# Supplementary material for: Signaling from the C. elegans Hypodermis Non-autonomously Facilitates Short-term Associative Memory
Source: bioRxiv preprint, doi:10.1101/2023.02.16.528821, version 1 (2023-02-16)
Supplement: Table S1 [file 528821_file02.xlsx]

## Sheet: Hypodermal AID auxin VS ctrl
WormBase ID	baseMean	log2FoldChange	lfcSE	stat	pvalue	padj
WBGene00001387	2242.61	3.35886	0.124531	26.9722	3.13422e-160	4.38822e-156	far-3
WBGene00004009	85.2974	2.36047	0.188488	12.5232	5.57464e-36	3.90253e-32	pgp-15
WBGene00020054	116.939	-1.89083	0.175467	-10.776	4.46712e-27	8.93488e-24	R13D7.2
WBGene00000613	97.6905	2.38934	0.198996	12.0069	3.26672e-33	1.14343e-29	col-36
WBGene00010528	106.343	2.08931	0.174299	11.987	4.15854e-33	1.16447e-29	K03D3.2
WBGene00004236	272.443	1.74322	0.157258	11.0851	1.48129e-28	3.4566e-25	ptr-22
WBGene00013007	125.656	-1.88653	0.180131	-10.4731	1.14842e-25	2.00987e-22	Y48E1B.8
WBGene00009485	133.011	-1.22697	0.171915	-7.13708	9.53378e-13	4.60284e-10	F36G9.3
WBGene00017331	934.354	1.26683	0.125557	10.0897	6.13533e-24	9.54452e-21	ugt-40
WBGene00017806	143.578	1.5713	0.158225	9.93083	3.05687e-23	4.27992e-20	F26A1.8
WBGene00017336	2381.47	0.932044	0.0944989	9.86302	6.02123e-23	7.66393e-20	ugt-41
WBGene00011753	1278.26	-1.18562	0.122557	-9.67404	3.88705e-22	4.53521e-19	T13F3.6
WBGene00045096	176.897	1.72133	0.182559	9.42888	4.14477e-21	4.46391e-18	K01A6.7
WBGene00004155	186.896	1.37628	0.155271	8.86372	7.73895e-19	7.7395e-16	pqn-73
WBGene00018758	2218.11	0.928418	0.107732	8.61785	6.8224e-18	6.36803e-15	F53E10.1
WBGene00019744	3199.11	1.08734	0.129074	8.42411	3.63512e-17	3.18096e-14	M02H5.8
WBGene00044471	22.1669	1.64041	0.198597	8.25997	1.45705e-16	1.20001e-13	F56D6.9
WBGene00012176	201.272	1.53779	0.18753	8.20024	2.399e-16	1.86602e-13	W01C9.2
WBGene00022386	763.185	0.936567	0.114742	8.16236	3.28547e-16	2.42105e-13	Y95B8A.6
WBGene00019234	421.2	0.963477	0.119899	8.03575	9.30067e-16	6.51093e-13	ugt-8
WBGene00020007	1235.08	0.800935	0.104057	7.69711	1.39175e-14	9.27902e-12	R11F4.1
WBGene00019021	45.1953	1.52483	0.199897	7.62808	2.3828e-14	1.51644e-11	F57H12.6
WBGene00019479	2072.12	-1.17678	0.0967224	-12.1666	4.68246e-34	2.1853e-30	K07C11.7
WBGene00219950	1522.57	1.09215	0.145289	7.51708	5.60146e-14	3.3198e-11	F46A8.13
WBGene00015710	50.1272	-1.15896	0.194607	-5.95538	2.5947e-09	5.6763e-07	C12D5.9
WBGene00002102	94.8407	-1.15735	0.192926	-5.99892	1.98636e-09	4.48565e-07	ins-19
WBGene00007957	1236.76	0.963547	0.133948	7.19343	6.31818e-13	3.27633e-10	C35C5.8
WBGene00011879	80.6565	-1.08338	0.172756	-6.27117	3.58352e-10	9.83781e-08	pho-7
WBGene00004052	75.0656	-1.07468	0.181907	-5.90784	3.46619e-09	7.13679e-07	parg-2
WBGene00008519	113.018	1.17242	0.164989	7.10607	1.19391e-12	5.57197e-10	cyp-13B1
WBGene00011042	33.0128	1.41116	0.200572	7.03569	1.98284e-12	8.95541e-10	R05H10.1
WBGene00012664	4312.34	0.972359	0.140454	6.92297	4.42284e-12	1.93513e-09	Y39B6A.1
WBGene00017134	36956.7	0.741422	0.108969	6.80395	1.01791e-11	4.31873e-09	EEED8.3
WBGene00009488	1221.08	0.836917	0.123288	6.78831	1.13453e-11	4.67194e-09	oac-20
WBGene00003504	26519.4	0.624619	0.0930125	6.71543	1.87514e-11	7.50111e-09	mut-7
WBGene00000111	282.589	0.943198	0.140835	6.6972	2.12447e-11	8.2624e-09	alh-5
WBGene00021948	1052.57	0.637451	0.0968358	6.5828	4.61667e-11	1.74697e-08	kvs-5
WBGene00017253	102.257	-1.03563	0.169112	-6.1239	9.13125e-10	2.32448e-07	sdz-9
WBGene00008803	529.3	0.917629	0.139901	6.55914	5.41199e-11	1.9429e-08	lips-10
WBGene00007932	916.799	0.800979	0.122227	6.55323	5.63053e-11	1.95315e-08	zip-5
WBGene00018403	1697.51	0.564606	0.0861876	6.55089	5.71952e-11	1.95315e-08	F44A2.3
WBGene00021797	78.6843	1.28261	0.196053	6.54217	6.06311e-11	2.02118e-08	plep-1
WBGene00008563	274.39	-0.999753	0.153179	-6.52671	6.72286e-11	2.18899e-08	F07H5.13
WBGene00015449	2985.65	0.830492	0.12749	6.51419	7.30821e-11	2.27383e-08	ugt-63
WBGene00044201	279.274	1.20083	0.184288	6.51608	7.21706e-11	2.27383e-08	H39E23.3
WBGene00021197	77.9769	-0.967356	0.192915	-5.01441	5.31968e-07	4.68433e-05	Y17G9A.4
WBGene00021032	23.433	-0.940738	0.200883	-4.68301	2.82693e-06	0.000172837	clec-118
WBGene00009487	17.4092	1.25146	0.197708	6.32988	2.45357e-10	7.01071e-08	clec-232
WBGene00017772	10955.2	0.563363	0.088981	6.33128	2.43142e-10	7.01071e-08	clec-1
WBGene00000756	12.4934	1.17306	0.186674	6.28402	3.29927e-10	9.23862e-08	col-183
WBGene00007450	67.7673	-0.91617	0.175033	-5.23427	1.65634e-07	1.91625e-05	C08F11.1
WBGene00000282	2289.5	0.7317	0.117151	6.24581	4.21609e-10	1.13518e-07	cah-4
WBGene00010515	26.059	-0.914684	0.199257	-4.59047	4.42255e-06	0.000234546	K02E11.6
WBGene00019413	52.7528	-0.911653	0.198966	-4.58196	4.60629e-06	0.000242454	fbxb-50
WBGene00011112	888.521	-0.887963	0.122025	-7.27691	3.41564e-13	1.91289e-10	R07E5.4
WBGene00009988	241.618	0.785963	0.128415	6.12048	9.32958e-10	2.33256e-07	F53F4.4
WBGene00010958	564.22	-0.863875	0.165392	-5.22321	1.75852e-07	1.98062e-05	ndfl-4
WBGene00015607	69.4559	-0.861444	0.178337	-4.83043	1.36238e-06	9.83234e-05	fbxb-13
WBGene00017251	158.86	-0.848598	0.15961	-5.3167	1.05664e-07	1.33279e-05	fbxb-105
WBGene00002024	2173.37	-0.496708	0.0821804	-6.04412	1.50227e-09	3.50555e-07	hsp-43
WBGene00007890	545.831	-0.847076	0.131808	-6.42659	1.30501e-10	3.97206e-08	C33A12.19
WBGene00012878	1084.11	-0.841801	0.138875	-6.06158	1.34794e-09	3.26448e-07	Y45F10C.2
WBGene00021779	237.913	-0.834761	0.159315	-5.2397	1.60838e-07	1.89235e-05	Y51H7C.1
WBGene00011117	102.089	-0.827867	0.169319	-4.88939	1.01148e-06	7.73864e-05	R07E5.11
WBGene00003752	686.372	0.582689	0.0981116	5.93905	2.86685e-09	6.17519e-07	nlp-14
WBGene00010274	267.142	-0.827551	0.139639	-5.92638	3.09687e-09	6.56958e-07	F58G6.3
WBGene00004322	13234.5	0.637629	0.107811	5.9143	3.33292e-09	6.96481e-07	rcq-5
WBGene00012038	160.513	-0.821137	0.155103	-5.29413	1.19583e-07	1.46867e-05	T26E3.5
WBGene00016621	133.145	-0.804167	0.181135	-4.43961	9.01231e-06	0.000409348	arch-1
WBGene00015551	5763.89	0.700881	0.120055	5.83801	5.28292e-09	1.05666e-06	adah-1
WBGene00019121	5156.37	0.649922	0.111448	5.83159	5.49015e-09	1.08264e-06	npl-4.2
WBGene00009442	7565.22	0.603534	0.104298	5.78665	7.18035e-09	1.39628e-06	F35G12.5
WBGene00010846	10230.7	0.70312	0.1218	5.77273	7.79989e-09	1.49598e-06	M04B2.2
WBGene00001912	26.9781	-0.796321	0.200662	-3.96847	7.23363e-05	0.00194001	his-38
WBGene00044431	335.959	-0.795372	0.174477	-4.55862	5.14918e-06	0.000262159	mzt-1
WBGene00004896	10385.3	0.622122	0.109084	5.70314	1.17617e-08	2.16679e-06	smu-2
WBGene00001477	2441.57	1.12776	0.197862	5.69974	1.19992e-08	2.18182e-06	fmo-2
WBGene00010609	44036.8	0.643189	0.113177	5.68305	1.32311e-08	2.37499e-06	dut-1
WBGene00020115	4111.89	-0.486476	0.0860679	-5.65223	1.58375e-08	2.80685e-06	mboa-6
WBGene00000781	6846.22	0.653128	0.115762	5.64201	1.68073e-08	2.90519e-06	cpr-1
WBGene00017678	788.308	1.13303	0.200848	5.64122	1.68847e-08	2.90519e-06	asp-12
WBGene00006726	345.406	-0.791897	0.177649	-4.45766	8.2858e-06	0.000379116	ubl-5
WBGene00007758	517.038	-0.791856	0.149655	-5.2912	1.21517e-07	1.47944e-05	C27A7.8
WBGene00018523	421.92	0.649934	0.11563	5.62082	1.90049e-08	3.1677e-06	lact-1
WBGene00016664	1156.18	0.693823	0.124569	5.56981	2.5502e-08	4.19569e-06	C45E5.1
WBGene00008554	40.6527	-0.791492	0.200947	-3.93881	8.18866e-05	0.00210366	F07C6.3
WBGene00007833	474.047	0.838903	0.150886	5.55985	2.70001e-08	4.34515e-06	oac-6
WBGene00017335	301.082	0.691355	0.124581	5.54943	2.86604e-08	4.55994e-06	F10D2.10
WBGene00009515	49.4586	-0.7909	0.194028	-4.07622	4.57731e-05	0.00138485	clec-170
WBGene00020947	961.598	0.660547	0.119209	5.54107	3.00634e-08	4.67686e-06	W02F12.2
WBGene00014030	11426.2	0.762923	0.137886	5.53301	3.14773e-08	4.8259e-06	glb-1
WBGene00017673	19.7713	1.02346	0.185018	5.53172	3.17108e-08	4.8259e-06	icmt-1
WBGene00017405	69.1413	-0.786318	0.180776	-4.34968	1.36334e-05	0.000551678	bath-31
WBGene00022781	41832.7	0.571989	0.103804	5.51029	3.58237e-08	5.33582e-06	pmt-1
WBGene00010723	173.95	0.956828	0.173813	5.50493	3.69306e-08	5.4428e-06	cpg-7
WBGene00019906	19.7842	-0.781847	0.200996	-3.88986	0.000100301	0.00248992	R05G9R.1
WBGene00009982	122.055	-0.779181	0.191721	-4.06414	4.82095e-05	0.00143005	F53F1.4
WBGene00001993	4233.5	-0.482287	0.0880155	-5.47957	4.26359e-08	6.09128e-06	hpd-1
WBGene00018016	18942.5	0.61105	0.112434	5.43474	5.48769e-08	7.76093e-06	lrr-1
WBGene00001936	27.0799	-0.775606	0.198555	-3.90625	9.37391e-05	0.00234784	his-62
WBGene00013446	2016.49	-0.773988	0.140234	-5.51925	3.40457e-08	5.12552e-06	Y66D12A.21
Gene:WBGene00219707	99.0975	-0.770763	0.181811	-4.23937	2.24147e-05	0.000815661	#N/A
WBGene00022642	21244.7	0.600331	0.1113	5.39382	6.89762e-08	9.37607e-06	lipl-5
WBGene00013308	2170.61	-0.769451	0.130639	-5.8899	3.86434e-09	7.84126e-07	nuo-3
WBGene00003997	1497.39	0.568326	0.105416	5.39129	6.99547e-08	9.37765e-06	pgp-3
WBGene00008535	6368.57	0.61974	0.115095	5.38458	7.26156e-08	9.59142e-06	F02H6.2
WBGene00013552	29575.9	0.638925	0.118877	5.37467	7.67229e-08	1.00392e-05	gmn-1
WBGene00020073	657.857	-0.764675	0.127016	-6.02032	1.74069e-09	3.99532e-07	sdz-28
WBGene00005602	275.003	0.691755	0.129374	5.34694	8.94534e-08	1.14903e-05	srj-14
WBGene00018601	22.7073	1.07436	0.20138	5.33496	9.55662e-08	1.21638e-05	F48C1.9
WBGene00015008	53.4128	-0.763143	0.201399	-3.78921	0.000151129	0.00338012	lmd-2
WBGene00003183	20762.1	0.642121	0.12103	5.30546	1.12392e-07	1.405e-05	mei-1
WBGene00019362	2301.75	-0.409654	0.077323	-5.29797	1.171e-07	1.4509e-05	cdk-2
WBGene00020800	25.8552	-0.759996	0.20089	-3.78315	0.000154859	0.00343066	zig-10
WBGene00013100	25.2958	-0.758453	0.198436	-3.82215	0.000132293	0.00306155	zip-7
WBGene00004085	1310.87	-0.499759	0.0945528	-5.2855	1.25363e-07	1.5131e-05	pph-4.1
WBGene00004388	15088.7	0.509068	0.096944	5.25116	1.51148e-07	1.80873e-05	rnp-5
WBGene00021024	5803.52	0.580734	0.110635	5.24911	1.52834e-07	1.81342e-05	W04C9.2
WBGene00020544	120.202	-0.758075	0.174463	-4.34518	1.39163e-05	0.000559891	fbxb-84
WBGene00000263	5271.86	0.596647	0.114054	5.23128	1.68345e-07	1.91625e-05	F23H11.5
WBGene00001500	95.9791	0.991422	0.189387	5.23489	1.65083e-07	1.91625e-05	ftn-1
WBGene00002117	24.2359	-0.75593	0.19113	-3.95506	7.65164e-05	0.00201753	ins-34
WBGene00009885	1380.74	0.705197	0.134775	5.2324	1.67324e-07	1.91625e-05	moc-5
WBGene00020542	126.499	-0.755552	0.183371	-4.12035	3.78294e-05	0.00118756	fbxb-82
WBGene00014034	579.51	-0.754164	0.147543	-5.11148	3.1965e-07	3.17406e-05	ZK643.2
WBGene00020695	1842.34	-0.461253	0.0885096	-5.21133	1.87492e-07	2.06699e-05	T22F3.2
WBGene00022166	5047.85	0.400263	0.0767891	5.21251	1.86307e-07	2.06699e-05	Y71H2AM.1
WBGene00001509	17904.2	0.449818	0.0867391	5.18588	2.15001e-07	2.35174e-05	fzo-1
WBGene00001166	35821	0.420776	0.0813379	5.17319	2.30134e-07	2.49776e-05	eftu-2
WBGene00009397	1450.64	0.674196	0.130408	5.16989	2.34233e-07	2.51443e-05	clec-66
WBGene00020543	106.404	-0.751583	0.181368	-4.14398	3.41332e-05	0.00110882	fbxb-83
WBGene00008682	85767.3	0.566639	0.109732	5.16384	2.41939e-07	2.5662e-05	lex-1
WBGene00007929	39.872	1.02651	0.198894	5.16111	2.45495e-07	2.58434e-05	dmd-10
WBGene00005010	9831.29	0.476952	0.0925935	5.15103	2.59059e-07	2.70678e-05	spr-5
WBGene00002004	26183.4	0.606925	0.118182	5.13552	2.81372e-07	2.91814e-05	hsf-1
WBGene00008354	107.828	-0.750267	0.166254	-4.51278	6.39824e-06	0.000314322	gcsh-1
WBGene00016877	44.2537	-0.748961	0.200017	-3.74448	0.000180767	0.00383472	C52D10.3
WBGene00219795	202.984	0.651461	0.127136	5.12411	2.98939e-07	3.05161e-05	C02F5.15
WBGene00008032	5357.26	0.653494	0.127721	5.1166	3.11097e-07	3.13358e-05	C39E9.8
WBGene00000200	31937.7	0.550383	0.107644	5.11297	3.17127e-07	3.1715e-05	arx-2
WBGene00017262	891.717	-0.748513	0.120928	-6.18972	6.02721e-10	1.59221e-07	F08F3.4
WBGene00019167	4783.3	0.420256	0.0825123	5.09325	3.51972e-07	3.4704e-05	H06I04.1
WBGene00010196	14744.6	0.64811	0.127471	5.08436	3.68877e-07	3.61164e-05	F57C2.4
WBGene00020087	3641.79	0.415386	0.081825	5.07652	3.84414e-07	3.73763e-05	R119.1
WBGene00015711	21.9303	-0.745713	0.194443	-3.83512	0.000125503	0.00294827	C12D5.10
WBGene00010681	13314	0.601297	0.118603	5.06982	3.98194e-07	3.81857e-05	mak-1
WBGene00044197	163.111	-0.744012	0.177142	-4.20008	2.66822e-05	0.000936283	fbxb-63
WBGene00016790	1984.57	0.538282	0.106406	5.05875	4.22024e-07	3.99241e-05	C49H3.3
WBGene00011589	2391.19	-0.491463	0.0971997	-5.05622	4.27647e-07	4.01845e-05	T07F10.3
WBGene00022591	29.8951	-0.742769	0.201412	-3.68781	0.000226192	0.00454364	cuti-1
WBGene00018420	9887.51	0.483551	0.0958943	5.04254	4.594e-07	4.24179e-05	F44E2.7
WBGene00015005	24.1544	-0.74157	0.201294	-3.68401	0.000229591	0.00455959	B0034.5
WBGene00014252	19008.6	0.650138	0.128985	5.04041	4.6453e-07	4.2509e-05	ZK1320.2
WBGene00022222	637.507	0.579346	0.115008	5.03745	4.71771e-07	4.28913e-05	Y73B3A.21
WBGene00005616	110.155	0.921144	0.183283	5.0258	5.0134e-07	4.49952e-05	srj-29
WBGene00020467	8280.21	0.625867	0.124515	5.02645	4.99632e-07	4.49952e-05	T12F5.2
WBGene00015894	424.108	-0.737327	0.199083	-3.70362	0.000212543	0.00436337	acdh-2
WBGene00018724	86.8191	0.914546	0.182102	5.02216	5.10942e-07	4.52766e-05	F53A9.1
WBGene00011391	459.336	-0.729005	0.135926	-5.36326	8.1733e-08	1.05958e-05	mrps-12
WBGene00008211	868.36	-0.728987	0.15237	-4.78431	1.71575e-06	0.00011632	C49F5.7
WBGene00011158	12.5773	0.888277	0.177727	4.99798	5.79336e-07	5.03807e-05	chil-16
WBGene00018606	182.649	-0.728498	0.17391	-4.18893	2.80267e-05	0.000968895	F48E3.6
WBGene00001694	254.795	-0.72778	0.150941	-4.82162	1.42396e-06	0.000101719	grd-5
WBGene00012521	40.0212	1.00356	0.20137	4.98367	6.23893e-07	5.30852e-05	Y32B12B.1
WBGene00015802	2445.54	-0.474528	0.0952268	-4.98314	6.25602e-07	5.30852e-05	kynu-1
WBGene00017881	8520.85	-0.497266	0.0998207	-4.98159	6.30629e-07	5.31894e-05	asp-13
WBGene00045261	912.145	-0.721173	0.126159	-5.71638	1.08816e-08	2.05882e-06	H29C22.1
WBGene00004323	18798.7	0.428412	0.0861356	4.9737	6.56883e-07	5.48628e-05	rde-1
WBGene00001820	238.45	-0.72116	0.147595	-4.88607	1.02869e-06	7.82753e-05	ham-1
WBGene00010084	3917.19	-0.49211	0.0993414	-4.95372	7.28071e-07	5.9963e-05	F55B11.2
WBGene00007097	719.147	0.951006	0.19224	4.94697	7.53767e-07	6.10029e-05	B0024.4
WBGene00012428	1572.12	-0.719234	0.100127	-7.18322	6.80904e-13	3.40476e-10	Y11D7A.3
WBGene00021938	9695.11	0.46337	0.0936571	4.94752	7.5165e-07	6.10029e-05	Y55F3BR.1
WBGene00019914	4223.4	-0.448559	0.0907448	-4.94309	7.68954e-07	6.18743e-05	clec-150
WBGene00007203	120.576	0.833943	0.168811	4.94011	7.80799e-07	6.24684e-05	best-1
WBGene00004051	13709.3	0.325211	0.0658464	4.93894	7.85501e-07	6.24875e-05	parg-1
WBGene00013725	5030.03	0.485865	0.098525	4.93139	8.16461e-07	6.45835e-05	ska-1
WBGene00009577	111.679	-0.719148	0.170854	-4.20913	2.56359e-05	0.000908678	F40F8.4
WBGene00018398	5054.77	0.619438	0.126023	4.91529	8.86527e-07	6.93423e-05	sptl-2
WBGene00008132	21069	0.558587	0.113894	4.90446	9.36835e-07	7.28701e-05	gale-1
WBGene00050885	1452.31	0.677971	0.138297	4.90228	9.473e-07	7.3277e-05	Y94H6A.12
WBGene00043983	616.898	0.730575	0.149212	4.89623	9.76936e-07	7.51543e-05	C39D10.11
WBGene00019643	39.7383	-0.716037	0.19987	-3.58251	0.000340304	0.00591875	K11C4.2
WBGene00012899	94.1855	-0.714553	0.177068	-4.03548	5.44917e-05	0.00155702	Y46G5A.7
WBGene00012732	1943.45	0.538212	0.11031	4.87908	1.06581e-06	8.06619e-05	wac-1.2
WBGene00013980	414.53	-0.714068	0.136737	-5.22218	1.76829e-07	1.98062e-05	dos-1
WBGene00015346	10029.6	0.551395	0.113344	4.86481	1.14566e-06	8.53495e-05	C02F5.3
WBGene00018384	288.212	0.610895	0.125576	4.86475	1.14604e-06	8.53495e-05	F43C11.7
WBGene00001990	23.6231	-0.714007	0.201126	-3.55004	0.00038517	0.00646615	hot-5
WBGene00011185	91.4506	-0.712114	0.164102	-4.33946	1.42832e-05	0.000571368	R10D12.1
WBGene00016017	187.877	0.949961	0.195827	4.85103	1.22822e-06	8.95642e-05	C23G10.11
WBGene00019261	8011.88	0.538509	0.111003	4.85129	1.2266e-06	8.95642e-05	H34I24.2
WBGene00011932	3924.15	-0.409054	0.0845142	-4.84006	1.298e-06	9.41625e-05	sptl-3
WBGene00008360	24.9049	-0.711587	0.201312	-3.53474	0.000408171	0.0067233	nspc-19
WBGene00008174	1969.34	-0.493791	0.102262	-4.82866	1.37454e-06	9.8692e-05	C48B4.11
WBGene00018021	67.5573	-0.708604	0.171603	-4.12932	3.63836e-05	0.00115774	F34D6.1
WBGene00014087	12324.4	0.44626	0.0926205	4.81816	1.44889e-06	0.000102974	ZK809.5
WBGene00235114	157.149	0.840416	0.174853	4.80641	1.53667e-06	0.000108661	ZK105.13
WBGene00004341	9045.37	0.532277	0.110924	4.79855	1.59815e-06	0.000112441	rfl-1
WBGene00011814	7554.35	0.435168	0.090726	4.79651	1.61457e-06	0.000113028	gtf-2H2C
WBGene00004248	5524.89	0.375648	0.0783561	4.79412	1.63394e-06	0.000113781	pus-1
WBGene00017642	20587.9	0.436028	0.0909684	4.79318	1.64157e-06	0.000113781	F20D12.2
WBGene00018707	86.8279	0.964358	0.201277	4.79119	1.65796e-06	0.00011435	oac-31
WBGene00007103	2710.38	0.44682	0.0932882	4.78967	1.67055e-06	0.000114654	crm-1
WBGene00022734	953.562	-0.707884	0.114916	-6.16002	7.27352e-10	1.88586e-07	ZK418.5
WBGene00016547	21.3608	-0.707193	0.201383	-3.51168	0.00044528	0.00717418	C40A11.4
WBGene00015310	18148.1	0.446264	0.0932857	4.78384	1.71976e-06	0.00011632	fan-1
WBGene00001869	12267.2	0.517588	0.108224	4.78257	1.73069e-06	0.000116497	him-10
WBGene00011017	725.236	-0.707071	0.149128	-4.74137	2.12277e-06	0.00013603	R04F11.5
WBGene00020394	91.0479	0.818155	0.171289	4.77646	1.78412e-06	0.00011895	T10B5.8
WBGene00010198	10429.4	0.434177	0.0910698	4.76752	1.86509e-06	0.000123663	spat-1
WBGene00003860	112.836	-0.703478	0.182405	-3.85667	0.000114942	0.00275565	oig-2
WBGene00000179	480.562	-0.484721	0.101775	-4.76265	1.91063e-06	0.000124805	aqp-11
WBGene00000749	38.8797	0.957866	0.201146	4.76203	1.91651e-06	0.000124805	col-176
WBGene00004884	8551.56	0.401321	0.0842694	4.76236	1.91344e-06	0.000124805	smg-6
WBGene00001752	515.424	-0.702892	0.141334	-4.97328	6.58306e-07	5.48628e-05	gst-4
WBGene00001595	284611	0.609523	0.128541	4.74187	2.11756e-06	0.00013603	gld-1
WBGene00004008	2912.61	0.671495	0.141639	4.7409	2.12775e-06	0.00013603	pgp-14
WBGene00022349	464.088	-0.702242	0.151979	-4.62064	3.82556e-06	0.000215975	Y82E9BR.17
WBGene00003164	7983.81	0.443122	0.0937233	4.72798	2.26763e-06	0.000144314	mdt-6
WBGene00013381	11142.7	0.439278	0.0931164	4.71752	2.3874e-06	0.000151249	cyp-31A5
WBGene00010597	2703.29	0.631606	0.134076	4.7108	2.46742e-06	0.000155337	K06A4.7
WBGene00015613	85.1505	-0.701846	0.190146	-3.69109	0.000223299	0.00453103	C08F1.10
WBGene00022176	21851.7	0.551773	0.117294	4.70417	2.54897e-06	0.000159322	Y71H2AM.11
WBGene00007404	202.124	0.704011	0.149822	4.69897	2.61475e-06	0.000162707	best-5
WBGene00000785	7243.05	0.634224	0.135066	4.69566	2.65749e-06	0.000164635	cpr-5
WBGene00007235	78702.7	0.578435	0.123335	4.68996	2.73261e-06	0.000168543	ahsa-1
WBGene00003092	48.8401	0.921474	0.196622	4.68653	2.77878e-06	0.000170639	lys-3
WBGene00008086	27.2086	-0.701436	0.199393	-3.51785	0.000435059	0.00705825	C44C10.5
WBGene00009048	383.116	0.53776	0.114982	4.67691	2.91231e-06	0.000177284	cth-1
WBGene00001628	14469.5	0.345629	0.0739978	4.67081	3.00022e-06	0.000181844	gly-3
WBGene00010439	6927.35	0.430195	0.0922444	4.66364	3.10664e-06	0.000186678	JC8.7
WBGene00017708	6800.2	0.584051	0.125215	4.66439	3.0953e-06	0.000186678	F22E5.9
WBGene00000250	13681.4	0.463344	0.0994486	4.65913	3.17551e-06	0.000189193	bir-2
WBGene00077490	64.4998	-0.700465	0.1811	-3.86783	0.00010981	0.00265535	M03A1.8
WBGene00007488	1609.9	-0.48299	0.103721	-4.65661	3.21452e-06	0.000190185	dph-2
WBGene00008145	8110.72	0.451414	0.0969467	4.65631	3.21932e-06	0.000190185	set-5
WBGene00009192	2582.34	0.478058	0.102944	4.64385	3.41978e-06	0.000201178	asah-2
WBGene00011908	9001.4	0.332479	0.0716144	4.64263	3.44e-06	0.000201266	pash-1
WBGene00019276	1150.49	-0.491053	0.105784	-4.64203	3.45003e-06	0.000201266	algn-5
WBGene00009429	3694.94	0.925587	0.199492	4.63972	3.48881e-06	0.000201847	irg-5
WBGene00012998	5316.91	0.380702	0.0820403	4.64043	3.47691e-06	0.000201847	Y48C3A.20
WBGene00012123	45.9397	-0.699087	0.194409	-3.59597	0.000323191	0.00568466	T28D6.3
WBGene00011481	38655.7	0.442584	0.0956504	4.6271	3.70818e-06	0.00021278	imp-2
WBGene00015160	12344.9	0.418068	0.0904002	4.62463	3.75265e-06	0.000214452	B0361.6
WBGene00002032	10603.1	0.460898	0.0997378	4.6211	3.81717e-06	0.000215975	htp-1
WBGene00004762	24987.1	0.420317	0.0909544	4.62118	3.81555e-06	0.000215975	sel-5
WBGene00006685	92.2551	-0.698792	0.182458	-3.82989	0.000128203	0.00299661	twk-33
WBGene00002131	1937.19	-0.410104	0.0888564	-4.61535	3.92425e-06	0.000220656	inx-9
WBGene00012591	71.9335	0.902579	0.195715	4.61169	3.99404e-06	0.000223643	nspe-1
WBGene00021763	4151.46	-0.42023	0.0911385	-4.6109	4.00931e-06	0.000223643	Y51F10.2
WBGene00011072	53.852	-0.696206	0.190599	-3.65273	0.000259471	0.00498776	tag-209
WBGene00004700	6363.63	-0.490201	0.106488	-4.60335	4.15753e-06	0.000228364	rsp-3
WBGene00009659	76.7896	-0.694816	0.194217	-3.57752	0.000346868	0.00601534	F43G6.7
WBGene00014243	31549.1	0.431868	0.0938235	4.60298	4.1648e-06	0.000228364	dcaf-1
WBGene00016342	3310.77	0.478811	0.104034	4.60245	4.1755e-06	0.000228364	#N/A
WBGene00019622	35.5139	-0.694216	0.195852	-3.54459	0.000393227	0.00654789	K10C2.7
WBGene00077664	52.9195	-0.68991	0.18714	-3.68659	0.000227276	0.00455529	C43D7.11
WBGene00010960	68095.9	-0.68816	0.181654	-3.7883	0.000151679	0.00338162	atp-6
WBGene00019801	9424.76	0.435724	0.094824	4.59508	4.32575e-06	0.000233803	aak-1
WBGene00235094	186.184	0.739018	0.160833	4.59493	4.32898e-06	0.000233803	K08D9.9
WBGene00016644	521.099	-0.68517	0.107806	-6.35559	2.07627e-10	6.18507e-08	abhd-3.2
WBGene00016838	299.227	-0.684911	0.123009	-5.56797	2.57717e-08	4.19569e-06	C50F2.4
WBGene00023263	94.7517	0.77501	0.168828	4.59053	4.42125e-06	0.000234546	D1005.t1
WBGene00017208	69.7391	-0.675339	0.17962	-3.75982	0.000170038	0.00366826	fbxb-35
WBGene00020374	205.218	-0.673512	0.184469	-3.65108	0.000261138	0.00498776	serp-1.2
WBGene00003635	1773.64	0.524068	0.114516	4.57637	4.73121e-06	0.000246374	nhr-45
WBGene00007989	28.3811	0.903644	0.197447	4.57665	4.72488e-06	0.000246374	fipr-22
WBGene00012662	485.489	0.578974	0.126517	4.57626	4.73356e-06	0.000246374	Y39A1C.1
WBGene00008729	17955.6	0.52825	0.115481	4.57435	4.77707e-06	0.000246804	F13B12.1
WBGene00019203	2347.08	-0.453296	0.0990941	-4.5744	4.7759e-06	0.000246804	ttr-47
WBGene00006913	8103.21	-0.495259	0.108293	-4.57334	4.80011e-06	0.000247082	vha-4
WBGene00019233	46.4417	0.891692	0.195038	4.57188	4.83369e-06	0.000247899	ugt-14
WBGene00012319	16579.7	0.460407	0.100908	4.56265	5.05116e-06	0.000258107	ipla-3
WBGene00000690	46.9479	-0.672946	0.19181	-3.50839	0.00045082	0.0072219	col-116
WBGene00002173	17089.7	0.40598	0.0891242	4.55522	5.23315e-06	0.000265468	itr-1
WBGene00004032	28813.9	0.447603	0.0985923	4.53994	5.62714e-06	0.000283659	pkc-1
WBGene00017964	3718.2	0.432985	0.0953765	4.53974	5.63225e-06	0.000283659	F31F7.1
WBGene00021363	13392.8	0.414379	0.0913251	4.53741	5.69505e-06	0.000285793	taf-6.2
WBGene00007017	22574.8	0.429881	0.094854	4.53203	5.84203e-06	0.000291869	mdt-17
WBGene00020981	459.681	0.523659	0.115561	4.53146	5.85781e-06	0.000291869	W03D2.6
WBGene00003474	432.063	0.598041	0.132363	4.51817	6.23751e-06	0.000309686	mtl-2
WBGene00021596	2483.18	-0.455832	0.100941	-4.51584	6.30674e-06	0.000312016	spsb-2
WBGene00015483	118.683	-0.668448	0.184202	-3.62888	0.000284657	0.00522268	C05D11.5
WBGene00019588	252.431	0.698451	0.154746	4.51352	6.376e-06	0.000314322	K09F6.5
WBGene00019164	2726.54	0.480037	0.10643	4.51034	6.4723e-06	0.000314648	H06H21.8
WBGene00020481	69567.7	0.302943	0.0671624	4.51061	6.46425e-06	0.000314648	T13C2.6
WBGene00022814	93.629	0.831215	0.184231	4.51181	6.42766e-06	0.000314648	ZK742.4
WBGene00020562	4896.71	0.631376	0.140133	4.50554	6.62058e-06	0.000320743	T19C3.4
WBGene00005007	23938	0.467126	0.103771	4.50152	6.747e-06	0.000325741	spr-2
WBGene00008061	6194.44	0.336763	0.0748704	4.49794	6.86152e-06	0.000330131	mina-1
WBGene00009189	9368.39	0.367711	0.0817737	4.49669	6.90193e-06	0.000330938	F27D4.4
WBGene00011330	3551.26	0.812354	0.180836	4.49221	7.04872e-06	0.000335677	T01D3.6
WBGene00019854	1162.99	0.438904	0.0977003	4.49236	7.04394e-06	0.000335677	R03H10.1
WBGene00003061	884.08	-0.666035	0.123561	-5.39033	7.03273e-08	9.37765e-06	lpd-5
WBGene00012657	105.226	-0.665279	0.174587	-3.81059	0.000138638	0.00317169	Y39A1A.20
WBGene00016331	14938.2	0.332012	0.0741539	4.47734	7.55784e-06	0.000356287	obr-4
WBGene00015047	2813.24	0.488743	0.109199	4.47573	7.61511e-06	0.000357782	faah-1
WBGene00004993	4721.67	0.498896	0.111505	4.47418	7.67043e-06	0.000358296	spp-8
WBGene00021160	6343.1	0.398792	0.0891355	4.47399	7.67722e-06	0.000358296	gba-4
WBGene00000939	29975.1	0.329898	0.073797	4.47034	7.80956e-06	0.000363261	dcr-1
WBGene00002257	450.483	0.535785	0.120006	4.46465	8.02013e-06	0.000370126	lbp-5
WBGene00008842	18.9443	0.882592	0.197653	4.46535	7.99373e-06	0.000370126	chil-28
WBGene00019388	268.627	-0.661661	0.159115	-4.15839	3.20505e-05	0.00106115	K04F1.9
WBGene00007744	988.591	0.485958	0.108875	4.46345	8.06508e-06	0.000370227	C26D10.3
WBGene00007517	100.934	-0.660092	0.183434	-3.59852	0.000320037	0.00566477	gpx-3
WBGene00002221	11937.6	0.526534	0.118217	4.45395	8.4306e-06	0.000384485	klp-10
WBGene00013259	407.916	-0.659635	0.159588	-4.13337	3.5748e-05	0.00114271	trpp-5
WBGene00017293	684.211	-0.658062	0.138053	-4.76672	1.87248e-06	0.000123663	bmy-1
WBGene00003082	1664.98	-0.657711	0.116771	-5.63248	1.77641e-08	2.99657e-06	lsm-8
WBGene00011428	139.758	-0.655092	0.18863	-3.47289	0.000514884	0.00782725	nlp-80
WBGene00019738	1392.98	0.502167	0.113205	4.43591	9.16841e-06	0.000411433	clec-265
WBGene00004465	34033.9	0.460211	0.103857	4.43121	9.37039e-06	0.000418236	rpn-9
WBGene00019647	387.755	-0.651132	0.159865	-4.07302	4.64067e-05	0.00138833	K11D12.7
WBGene00018431	1023.98	-0.64934	0.119843	-5.41827	6.01777e-08	8.42548e-06	F44E7.9
WBGene00003715	185.654	0.668407	0.150919	4.42892	9.47081e-06	0.000420387	nhr-125
WBGene00019987	1175.42	-0.406477	0.0917963	-4.42803	9.50973e-06	0.000420387	R09F10.3
WBGene00006638	45646.5	0.493858	0.111558	4.42692	9.55874e-06	0.000420855	tsp-12
WBGene00011201	1471.83	0.368887	0.0833495	4.42579	9.60921e-06	0.000421751	nth-1
WBGene00003375	1113.19	-0.493127	0.111523	-4.42174	9.79104e-06	0.000427054	mlp-1
WBGene00021750	605.879	-0.482316	0.109073	-4.42196	9.78105e-06	0.000427054	Y50D4C.6
WBGene00023486	104.762	-0.646827	0.169393	-3.81849	0.000134271	0.00309198	K08B4.7
WBGene00010227	769.599	-0.646376	0.155882	-4.14658	3.37481e-05	0.00110012	F58A4.2
WBGene00009882	13026.4	0.454501	0.103133	4.40696	1.0483e-05	0.000453	vha-17
WBGene00017838	120.366	0.802219	0.182271	4.40125	1.07629e-05	0.000463668	F26G1.2
WBGene00003331	58.9138	0.787813	0.179237	4.39537	1.10582e-05	0.00047203	mir-238
WBGene00003405	33341.3	0.482894	0.109845	4.39613	1.10196e-05	0.00047203	mre-11
WBGene00021350	6049.94	-0.645893	0.127518	-5.06511	4.08172e-07	3.88763e-05	Y37E3.8
WBGene00012545	222.694	-0.645503	0.154569	-4.17614	2.96501e-05	0.0010037	Y37D8A.3
WBGene00018627	12.9965	-0.64418	0.18395	-3.50194	0.000461887	0.00734039	F49D11.3
WBGene00013462	13546.1	0.477775	0.108992	4.38356	1.16754e-05	0.000493858	micu-1
WBGene00018543	112.886	-0.644084	0.152906	-4.21229	2.52793e-05	0.000898315	ugt-32
WBGene00020589	90.5888	-0.640792	0.179827	-3.56337	0.000366121	0.00624367	T19H12.3
WBGene00019113	186.762	0.672403	0.153605	4.37748	1.20057e-05	0.000503268	F59E11.7
WBGene00002071	1172.73	-0.374081	0.0855041	-4.375	1.21431e-05	0.000507507	ile-2
WBGene00002996	2180.92	0.495419	0.113353	4.37058	1.23918e-05	0.000516361	lin-7
WBGene00009013	757.018	-0.640766	0.13476	-4.75488	1.98563e-06	0.000128708	mrps-33
WBGene00021011	113.25	0.826321	0.189119	4.36933	1.2463e-05	0.000516803	W03G1.5
WBGene00007225	4642.68	-0.363198	0.0832008	-4.36532	1.26939e-05	0.000524269	C01G6.3
WBGene00206419	1469.98	-0.397451	0.0910939	-4.36309	1.28239e-05	0.00052808	#N/A
WBGene00013080	1762.38	0.56062	0.12854	4.36145	1.29201e-05	0.000530482	Y51A2D.13
WBGene00020112	1753.59	-0.497854	0.114201	-4.35946	1.30382e-05	0.000533766	pfd-5
WBGene00021295	1319.48	0.397489	0.0911964	4.35861	1.30894e-05	0.000534299	Y25C1A.8
WBGene00006656	514.488	-0.487191	0.111811	-4.35725	1.31704e-05	0.000536044	twk-1
WBGene00009740	226.317	-0.640507	0.170612	-3.75418	0.000173907	0.00373446	F45H10.3
WBGene00044323	305.451	-0.640301	0.137422	-4.65936	3.17191e-06	0.000189193	tag-281
WBGene00019120	2263.08	0.399782	0.0919768	4.34655	1.38296e-05	0.000558006	npl-4.1
WBGene00019605	668.15	-0.639782	0.126889	-5.04208	4.60504e-07	4.24179e-05	ctsa-4.1
WBGene00044636	949.597	0.511614	0.117817	4.34245	1.40904e-05	0.00056527	B0393.9
WBGene00012434	273.629	-0.637943	0.16552	-3.85418	0.000116119	0.00277912	Y11D7A.10
WBGene00016568	1934.97	-0.636319	0.0878852	-7.24033	4.47581e-13	2.41022e-10	C41G11.1
WBGene00021749	4676.42	0.2829	0.0652421	4.33616	1.44991e-05	0.000576712	Y50D4C.5
WBGene00000039	68.2437	-0.634863	0.175847	-3.61031	0.000305826	0.00548088	acn-1
WBGene00021795	1068.03	-0.632554	0.112157	-5.6399	1.70149e-08	2.90519e-06	Y52E8A.2
WBGene00018511	21694.1	0.521834	0.120964	4.31397	1.60345e-05	0.000632393	F46F11.8
WBGene00004827	244.641	-0.632199	0.156504	-4.03951	5.35634e-05	0.00153676	skr-21
WBGene00022093	109.983	-0.632048	0.173263	-3.64792	0.000264374	0.0050088	Y69A2AR.22
WBGene00016118	1523.25	-0.385434	0.0893727	-4.31266	1.61305e-05	0.000633993	C25H3.9
WBGene00002245	20723.5	0.377199	0.0875496	4.3084	1.64437e-05	0.000641189	lag-1
WBGene00007153	22489.9	0.544849	0.126515	4.3066	1.65781e-05	0.000641189	clec-41
WBGene00015025	2847.52	-0.414489	0.0962417	-4.30675	1.6567e-05	0.000641189	mrpl-9
WBGene00017077	1854.41	0.545151	0.126571	4.30707	1.6543e-05	0.000641189	D2096.10
WBGene00014254	108.575	0.741348	0.172255	4.30378	1.67907e-05	0.000647623	cyp-13A10
WBGene00022025	1434.27	0.38515	0.0895106	4.30284	1.68622e-05	0.000648593	cus-2
WBGene00000962	134294	0.457246	0.106439	4.29587	1.74013e-05	0.000667493	dhc-1
WBGene00013131	728.125	-0.471849	0.109855	-4.29519	1.74541e-05	0.000667691	pigl-1
WBGene00007336	1049.51	-0.49903	0.116208	-4.29428	1.75261e-05	0.00066862	C05C12.4
WBGene00008446	606.23	0.499217	0.116487	4.28561	1.8224e-05	0.000693355	E01G4.3
WBGene00020386	471.765	0.494287	0.115371	4.28434	1.8328e-05	0.00069542	dach-1
WBGene00015454	5667.32	0.403127	0.094113	4.28344	1.84028e-05	0.000696371	C04G6.4
WBGene00010458	1187.62	-0.492268	0.115077	-4.27772	1.88814e-05	0.000712556	mrpl-10
WBGene00018932	10780.6	0.569433	0.133261	4.27308	1.92794e-05	0.00072562	mrpl-2
WBGene00016930	3649.41	0.567013	0.132782	4.27026	1.95246e-05	0.000732878	madf-6
WBGene00010094	939.969	-0.417371	0.0978537	-4.26526	1.99674e-05	0.000747495	tsfm-1
WBGene00004335	73.2503	-0.630893	0.17369	-3.6323	0.00028091	0.00520241	ref-2
WBGene00018698	35624.9	0.449528	0.105473	4.26201	2.02595e-05	0.000754398	vha-18
WBGene00007580	17311.2	0.411379	0.0965913	4.25897	2.05375e-05	0.000760702	C14B1.9
WBGene00002018	11.5419	-0.629872	0.179922	-3.50081	0.000463855	0.0073481	hsp-16.41
WBGene00002052	1423.41	-0.45994	0.10813	-4.2536	2.10359e-05	0.000777105	ifa-4
WBGene00017954	579.616	-0.628556	0.131291	-4.78749	1.68879e-06	0.00011534	F31E8.4
WBGene00018164	1644.75	-0.417146	0.0981061	-4.25199	2.11879e-05	0.000778614	sup-36
WBGene00004116	21017.7	0.46183	0.108705	4.24846	2.15249e-05	0.000788928	pqn-27
WBGene00018950	13735.2	0.389752	0.0918073	4.24533	2.1827e-05	0.000797911	F56C9.6
WBGene00012185	997.529	-0.62536	0.0952215	-6.56742	5.1194e-11	1.88623e-08	W01F3.2
WBGene00015233	1164.87	-0.475504	0.112168	-4.23923	2.24291e-05	0.000815661	B0511.7
WBGene00044921	306.478	0.620999	0.146545	4.23761	2.25914e-05	0.000819437	F53C11.9
WBGene00003918	54179	0.445218	0.105099	4.23616	2.27377e-05	0.000822609	par-3
WBGene00022669	815.727	-0.48993	0.115756	-4.23242	2.3119e-05	0.000834252	ZK177.1
WBGene00020516	2666.78	-0.386634	0.0914988	-4.22556	2.38344e-05	0.000857856	T15B7.1
WBGene00021784	12827.1	0.396189	0.0938754	4.22037	2.439e-05	0.000875602	cogc-4
WBGene00004492	56736.4	0.350972	0.0832409	4.21634	2.48302e-05	0.000884601	rps-23
WBGene00009499	10436	-0.351846	0.0834478	-4.21637	2.48269e-05	0.000884601	ent-6
WBGene00017075	19773.1	-0.320292	0.0759446	-4.21744	2.4709e-05	0.000884601	nap-1
WBGene00019354	624.49	-0.622654	0.135551	-4.59351	4.35844e-06	0.000233803	K03B4.2
WBGene00019704	91.5974	-0.621867	0.180309	-3.44889	0.000562895	0.00824957	fbxb-40
WBGene00021929	3507.12	-0.396313	0.0941796	-4.20806	2.5757e-05	0.000910664	dcap-1
WBGene00012187	904.147	0.522206	0.124239	4.20322	2.63139e-05	0.000928012	rpb-11
WBGene00001862	3405.35	-0.425337	0.101248	-4.20095	2.65802e-05	0.000935049	him-3
WBGene00018746	240.57	-0.619071	0.150643	-4.10952	3.9648e-05	0.00123085	fbxb-103
WBGene00019035	158.497	-0.613409	0.171941	-3.56755	0.000360332	0.00618261	fbxb-26
WBGene00021334	6346.1	0.34684	0.0826615	4.1959	2.71786e-05	0.000948946	vps-4
WBGene00001161	1766.92	-0.410491	0.0978674	-4.19436	2.73641e-05	0.000953047	efl-1
WBGene00016701	4152.12	0.410842	0.0980267	4.19112	2.77578e-05	0.000964359	dsb-3
WBGene00023209	1077.4	-0.612399	0.107252	-5.70991	1.13039e-08	2.1102e-06	ZC513.7
WBGene00043064	1297.92	-0.469163	0.111988	-4.18939	2.79707e-05	0.000968895	nbet-1
WBGene00002324	1325.7	0.396183	0.0947263	4.1824	2.8845e-05	0.00098999	let-49
WBGene00008991	3239.46	0.418594	0.100086	4.18237	2.88491e-05	0.00098999	F20G4.2
WBGene00019958	4920.5	0.702182	0.167882	4.18259	2.88203e-05	0.00098999	#N/A
WBGene00006724	1609.54	-0.406274	0.0971787	-4.18069	2.90626e-05	0.00099246	ubh-4
WBGene00012683	105.133	0.821435	0.196497	4.1804	2.90997e-05	0.00099246	asp-17
WBGene00013878	12242.7	0.365381	0.0874204	4.17958	2.92046e-05	0.00099246	atfs-1
WBGene00016002	27498.3	0.465229	0.111301	4.17994	2.91587e-05	0.00099246	gyf-1
WBGene00044066	136.793	-0.611676	0.167387	-3.65426	0.000257927	0.00498776	fbxb-66
WBGene00022492	1475.68	-0.490473	0.117453	-4.17592	2.96787e-05	0.0010037	dss-1
WBGene00002031	661.68	-0.427007	0.102301	-4.174	2.99296e-05	0.0010049	hst-6
WBGene00019415	381.371	-0.609983	0.118006	-5.16907	2.35262e-07	2.51443e-05	K05F6.4
WBGene00018782	30736.2	0.42438	0.101669	4.17413	2.99122e-05	0.0010049	cct-3
WBGene00021548	962.142	0.45982	0.110268	4.17003	3.04564e-05	0.00102014	trx-4
WBGene00022797	1184.78	0.436751	0.104822	4.1666	3.09172e-05	0.00103311	best-24
WBGene00017332	69.9942	0.800749	0.19226	4.16494	3.1144e-05	0.00103821	ugt-37
WBGene00013808	9705.63	0.297242	0.0714338	4.16109	3.16733e-05	0.00105334	sfa-1
WBGene00006918	1317.13	-0.609737	0.137376	-4.43846	9.06067e-06	0.000409348	vha-9
WBGene00019692	6434.8	0.338819	0.0814798	4.15832	3.20595e-05	0.00106115	fubl-4
WBGene00007797	842.329	-0.608767	0.122101	-4.98577	6.17154e-07	5.30109e-05	C29A12.1
WBGene00009156	101.697	-0.607316	0.169828	-3.57606	0.000348817	0.00603682	clec-196
WBGene00020891	640.018	0.496153	0.119509	4.15161	3.30146e-05	0.00108507	cest-24
WBGene00007363	917.523	-0.437338	0.105379	-4.15014	3.32269e-05	0.00108948	stdh-1
WBGene00015091	7752.92	0.355345	0.0856356	4.1495	3.33196e-05	0.00108997	B0261.1
WBGene00017676	500.679	-0.607228	0.136834	-4.4377	9.09273e-06	0.000409348	F21F3.7
WBGene00016886	109.426	-0.605706	0.170905	-3.5441	0.00039395	0.00654789	fbxb-96
WBGene00012192	298.219	-0.603531	0.137799	-4.37979	1.18795e-05	0.000500979	W02A11.1
WBGene00016918	536.613	-0.602222	0.117554	-5.12296	3.0078e-07	3.05161e-05	test-1
WBGene00016564	2771.13	-0.312713	0.0755049	-4.14163	3.44845e-05	0.00111505	cmt-1
WBGene00014207	4744.67	0.564384	0.136299	4.1408	3.46103e-05	0.00111654	ZK1058.9
WBGene00022864	272.453	-0.601211	0.150807	-3.98663	6.70193e-05	0.00183124	ZK1236.5
WBGene00077543	184.192	-0.60079	0.174579	-3.44137	0.000578783	0.00835674	F27D4.8
WBGene00008363	3922.73	-0.383641	0.0927657	-4.13559	3.54041e-05	0.00113431	D1046.2
WBGene00019407	196.733	-0.599577	0.129378	-4.63432	3.58116e-06	0.000206337	lect-2
WBGene00044789	414.618	-0.467796	0.113257	-4.13039	3.62149e-05	0.001155	T07A9.14
WBGene00020592	1590.55	-0.598097	0.079587	-7.51501	5.69068e-14	3.3198e-11	ugt-12
WBGene00001761	3749.12	-0.416193	0.100817	-4.12819	3.65633e-05	0.00116082	gst-13
WBGene00010844	2609.76	0.415788	0.100733	4.12762	3.66543e-05	0.00116108	prp-3
WBGene00010484	4317.58	0.552417	0.133888	4.12595	3.69209e-05	0.00116426	dph-3
WBGene00011221	398.168	-0.48339	0.117144	-4.12646	3.68387e-05	0.00116426	R10E12.2
WBGene00012522	16687.7	0.335851	0.0814723	4.12227	3.75157e-05	0.00118035	Y32B12B.2
WBGene00012221	616.99	-0.59745	0.144238	-4.1421	3.44133e-05	0.00111505	W03C9.5
WBGene00006463	12796.2	0.386429	0.0938064	4.11944	3.79799e-05	0.00118961	nduf-2.2
WBGene00013559	152.012	0.740022	0.179694	4.11823	3.818e-05	0.00119321	Y75B8A.28
WBGene00012389	9938.01	0.340692	0.0828611	4.1116	3.92929e-05	0.00122526	Y6B3B.4
WBGene00012131	278.341	0.61736	0.150199	4.11028	3.95179e-05	0.00122953	T28F3.5
WBGene00007825	229.544	-0.595135	0.166688	-3.57035	0.000356499	0.00614632	C30H6.8
WBGene00015134	536.134	-0.594604	0.132503	-4.48748	7.20696e-06	0.000342049	B0304.2
WBGene00016443	2673.72	-0.362696	0.0884755	-4.09939	4.14234e-05	0.00128028	C35D10.6
WBGene00006574	10224	0.548869	0.133961	4.09723	4.18123e-05	0.00128946	tin-13
WBGene00007947	2831.96	-0.593561	0.118161	-5.02334	5.07815e-07	4.52766e-05	C35A5.3
WBGene00019333	9816.51	0.423825	0.10363	4.08977	4.31796e-05	0.00132579	moma-1
WBGene00019439	558.049	0.581322	0.142164	4.0891	4.33054e-05	0.00132674	K06B9.2
WBGene00007429	2370.78	-0.479735	0.11741	-4.08599	4.38887e-05	0.00133875	C08B6.8
WBGene00013083	878.397	-0.438619	0.107342	-4.08617	4.38562e-05	0.00133875	Y51A2D.18
WBGene00019207	965.607	-0.428246	0.104855	-4.08416	4.42361e-05	0.00134641	fgt-1
WBGene00009084	20373.8	0.289107	0.0709076	4.07723	4.55744e-05	0.00138414	F23B12.7
WBGene00010613	163.75	-0.59208	0.171577	-3.45081	0.000558911	0.00821987	K07A1.6
WBGene00044698	309.406	-0.590616	0.138657	-4.25954	2.04851e-05	0.000760702	K09F5.6
WBGene00077771	2681.82	-0.337893	0.0829162	-4.07512	4.59904e-05	0.00138774	tspo-1
WBGene00022663	1419.94	-0.589733	0.14468	-4.07611	4.57956e-05	0.00138485	glrx-21
WBGene00014053	1752.29	0.508849	0.124925	4.07324	4.63645e-05	0.00138833	ZK669.3
WBGene00014227	1811.9	-0.328436	0.0806232	-4.07372	4.62683e-05	0.00138833	ZK1128.1
WBGene00008526	176.01	-0.588253	0.136072	-4.3231	1.53855e-05	0.00060851	F02D10.6
WBGene00045036	59.6021	0.761698	0.187085	4.0714	4.67313e-05	0.00139506	K08E4.7
WBGene00000779	4323.2	-0.587979	0.0970095	-6.06105	1.35233e-09	3.26448e-07	cpn-3
WBGene00009964	128.064	0.735906	0.18099	4.06599	4.78288e-05	0.00142176	fip-6
WBGene00018151	2330.26	-0.586889	0.118419	-4.95603	7.19464e-07	5.96048e-05	F37C12.3
WBGene00015525	4775.99	0.413602	0.101815	4.06228	4.85968e-05	0.00143848	rha-2
WBGene00013260	3159.41	0.293087	0.0721705	4.06103	4.88566e-05	0.00144313	rsr-2
WBGene00012015	38265.4	0.380314	0.0936977	4.05894	4.92953e-05	0.00145302	T25B9.9
WBGene00001177	3681.26	0.491037	0.121008	4.05788	4.95198e-05	0.00145647	egl-8
WBGene00016650	54844.2	0.351098	0.0865326	4.05741	4.96203e-05	0.00145647	ubr-4
WBGene00020300	2494.74	0.51572	0.127151	4.05598	4.99256e-05	0.00146236	ssna-1
WBGene00022413	4360.48	0.371817	0.0917361	4.05312	5.05393e-05	0.00147725	Y102A11A.3
WBGene00018802	7528.09	0.537267	0.132576	4.05253	5.06678e-05	0.00147792	F54D8.6
WBGene00004333	11075.4	0.41676	0.102889	4.05058	5.10901e-05	0.00148714	rec-8
WBGene00012382	1501.07	-0.585557	0.133733	-4.37854	1.19475e-05	0.000502333	ttr-16
WBGene00001484	814.801	-0.368986	0.0911572	-4.0478	5.17018e-05	0.00149871	fox-1
WBGene00012253	14436.4	0.420518	0.103927	4.0463	5.20334e-05	0.00150521	clec-50
WBGene00000301	2497.02	-0.47137	0.116525	-4.04523	5.22718e-05	0.00150588	cav-1
WBGene00007561	2161.28	-0.444389	0.109853	-4.04532	5.22522e-05	0.00150588	ccm-3
WBGene00004339	12277.4	0.374851	0.0926935	4.04399	5.25502e-05	0.00151079	rfc-3
WBGene00044953	126.568	-0.585512	0.154433	-3.79136	0.000149827	0.00336173	D2096.13
WBGene00018806	3688.38	0.372551	0.0922582	4.03813	5.38788e-05	0.00154265	F54D10.5
WBGene00012686	147.747	-0.582813	0.172158	-3.38533	0.00071093	0.00973048	Y39B6A.27
WBGene00009562	1083.93	0.477938	0.118537	4.03197	5.53111e-05	0.00157721	flp-22
WBGene00011501	90066.2	0.410209	0.101781	4.03029	5.57071e-05	0.00158527	rmd-1
WBGene00018152	86233.9	0.489411	0.121547	4.02652	5.66078e-05	0.00160764	acs-4
WBGene00004254	24991.4	0.359042	0.0891798	4.02604	5.6723e-05	0.00160765	pxf-1
WBGene00019939	286.028	0.623959	0.154999	4.02556	5.68402e-05	0.00160772	lips-17
WBGene00022113	2436.38	0.395834	0.0984173	4.022	5.77057e-05	0.00162891	Y71F9AL.8
WBGene00000040	14703.9	0.382606	0.0951725	4.02013	5.81648e-05	0.00163856	aco-1
WBGene00021514	5411.55	0.731065	0.181902	4.01901	5.84437e-05	0.00164311	Y41D4B.11
WBGene00013882	1167.01	0.399181	0.0993975	4.01601	5.91925e-05	0.00166083	msa-1
WBGene00017769	966.19	-0.444221	0.110699	-4.01287	5.99843e-05	0.00167968	hmgs-1
WBGene00007207	8394.8	0.308177	0.0768543	4.00988	6.07492e-05	0.0016977	fask-1
WBGene00004815	215.983	-0.582109	0.136581	-4.26201	2.02594e-05	0.000754398	skr-9
WBGene00008191	298.111	-0.581576	0.140509	-4.13906	3.48734e-05	0.00112244	C49A1.10
WBGene00018290	10123.3	0.426908	0.106735	3.99968	6.34273e-05	0.001762	vps-60
WBGene00045498	618.329	-0.468487	0.11725	-3.99562	6.45249e-05	0.00178894	F56F4.8
WBGene00007365	944.334	0.434298	0.108724	3.99449	6.48335e-05	0.00179394	C06B3.6
WBGene00009389	457.162	0.518103	0.129762	3.99273	6.53175e-05	0.00180377	F35B12.10
WBGene00017143	585.295	-0.483145	0.121063	-3.99087	6.58325e-05	0.00181085	EEED8.15
WBGene00018902	2349.68	-0.429845	0.1077	-3.99113	6.57591e-05	0.00181085	F55G1.6
WBGene00003990	654.989	-0.581377	0.133657	-4.34977	1.36283e-05	0.000551678	pfn-2
WBGene00009435	54897.4	0.444319	0.111392	3.98878	6.64133e-05	0.00181967	F35G2.1
WBGene00021898	746.319	0.451086	0.113158	3.98635	6.70969e-05	0.00183124	Y54G2A.36
WBGene00018071	384.703	-0.580437	0.146832	-3.95306	7.7157e-05	0.00201921	F35H10.6
WBGene00013393	13211	-0.456244	0.114493	-3.9849	6.75076e-05	0.00183886	Y62H9A.5
WBGene00015308	7249.5	-0.337433	0.0846981	-3.98394	6.77809e-05	0.00184272	ddi-1
WBGene00022449	4027.33	0.436208	0.109531	3.9825	6.81929e-05	0.00185033	#N/A
WBGene00007397	68.0275	0.779727	0.196027	3.97764	6.96025e-05	0.00188492	C07A4.2
WBGene00016500	856.474	-0.397536	0.100001	-3.97533	7.02829e-05	0.00189601	memo-1
WBGene00021590	297.438	0.587772	0.147842	3.97568	7.01774e-05	0.00189601	Y46D2A.2
WBGene00007018	2992.72	-0.362371	0.0912147	-3.97272	7.10561e-05	0.00191318	mdt-18
WBGene00013238	3191.84	-0.295232	0.0743527	-3.9707	7.1662e-05	0.0019258	trap-4
WBGene00004448	877.941	-0.58041	0.15158	-3.82906	0.000128631	0.00300161	rpl-34
WBGene00006959	13251.5	0.287544	0.0724651	3.96803	7.24679e-05	0.00194001	xbp-1
WBGene00003561	1544.01	0.4273	0.107741	3.96598	7.30938e-05	0.00194931	ncr-1
WBGene00014001	3942.86	0.316155	0.0797108	3.96628	7.30029e-05	0.00194931	pyk-2
WBGene00013947	1661.12	-0.453695	0.114439	-3.9645	7.35502e-05	0.00195775	ZK228.4
WBGene00001231	7499.21	-0.295133	0.0744807	-3.96254	7.41553e-05	0.00197011	eif-3.H
WBGene00018566	512.407	0.512444	0.129364	3.96125	7.45581e-05	0.00197706	F47E1.2
WBGene00001753	3830.49	0.519928	0.131371	3.9577	7.56737e-05	0.00200249	gst-5
WBGene00003989	11072.9	-0.363345	0.0918165	-3.9573	7.58031e-05	0.00200249	pfn-1
WBGene00007261	447.797	-0.579374	0.107185	-5.40537	6.46739e-08	8.96533e-06	lron-3
WBGene00020190	1659.48	-0.445066	0.112544	-3.95458	7.66684e-05	0.00201773	guk-1
WBGene00020296	7882.66	0.429639	0.10866	3.95396	7.68671e-05	0.00201917	rrp-8
WBGene00018088	985.172	-0.57851	0.125831	-4.59753	4.27538e-06	0.000232917	trpp-4
WBGene00018138	17070.4	-0.390544	0.0987903	-3.95327	7.70907e-05	0.00201921	folt-2
WBGene00017041	168.416	-0.577923	0.151113	-3.82445	0.000131066	0.0030432	D2007.1
WBGene00017962	497.719	-0.576808	0.128579	-4.48603	7.25635e-06	0.00034323	fbxa-72
WBGene00017060	145.61	0.664384	0.16816	3.95089	7.78605e-05	0.002027	D2063.1
WBGene00004480	3216.71	-0.449451	0.11378	-3.95019	7.80896e-05	0.00202845	rps-11
WBGene00012756	4762.45	0.318273	0.0805939	3.94909	7.84476e-05	0.00203397	Y41C4A.9
WBGene00017385	14127	0.380212	0.0963694	3.94536	7.96813e-05	0.00206214	F11G11.5
WBGene00009505	11313.8	0.354536	0.0898763	3.94471	7.98967e-05	0.0020639	F37B12.3
WBGene00008157	147.023	-0.576436	0.160226	-3.59765	0.000321106	0.00567651	C47F8.1
WBGene00010724	767.019	-0.413098	0.10484	-3.94027	8.13913e-05	0.00209478	K09E9.1
WBGene00015112	749.433	-0.574645	0.131525	-4.3691	1.24762e-05	0.000516803	B0281.5
WBGene00018268	107.49	0.78314	0.198855	3.93825	8.20784e-05	0.00210472	F41C3.2
WBGene00021921	10990.9	0.375461	0.0953888	3.93611	8.28123e-05	0.00211966	rbm-39
WBGene00009580	5038.91	-0.358392	0.0911584	-3.93153	8.44083e-05	0.00215657	xbx-6
WBGene00011111	3878.37	-0.400161	0.101823	-3.92998	8.49518e-05	0.0021665	snfc-5
WBGene00007955	1232.86	-0.421076	0.107157	-3.92952	8.51146e-05	0.00216671	selt-1.1
WBGene00021183	114.829	0.724885	0.184756	3.92347	8.72832e-05	0.00221788	Y9C9A.16
WBGene00009977	2524.75	-0.351266	0.0895651	-3.92191	8.78503e-05	0.00222825	swan-1
WBGene00007718	4130.25	-0.354464	0.090408	-3.92072	8.82863e-05	0.00223526	otub-1
WBGene00013967	1280.21	-0.385755	0.0984374	-3.91878	8.89968e-05	0.00224918	ZK287.7
WBGene00007848	786.54	-0.407959	0.104241	-3.9136	9.09303e-05	0.0022939	cytb-5.1
WBGene00022798	708.56	-0.4512	0.115386	-3.91036	9.21581e-05	0.00232069	fahd-1
WBGene00013529	1421.21	-0.381814	0.0976855	-3.90861	9.28287e-05	0.0023292	gtf-2H4
WBGene00019592	726.193	0.507708	0.129881	3.90901	9.26738e-05	0.0023292	K09F6.9
WBGene00021960	609.29	-0.574051	0.15209	-3.77442	0.000160383	0.00352514	tmem-258
WBGene00009500	770.092	0.53427	0.136812	3.90515	9.41666e-05	0.00235433	cfh-1
WBGene00017621	155.622	0.654749	0.167875	3.90022	9.61053e-05	0.00239852	txt-17
WBGene00013394	5505.38	-0.434789	0.11158	-3.89667	9.75245e-05	0.00242961	ule-5
WBGene00001169	13709.1	-0.352577	0.0905999	-3.89159	9.95905e-05	0.00247667	eef-1A.2
WBGene00014091	1416.94	-0.571986	0.0954255	-5.99406	2.04662e-09	4.54836e-07	ZK822.4
WBGene00044080	8697.94	-0.353588	0.0909494	-3.88775	0.000101179	0.00250728	D1086.10
WBGene00012362	3861.64	-0.364706	0.0938324	-3.88678	0.000101581	0.00251278	W09D10.4
WBGene00011189	769.437	-0.422193	0.10867	-3.88507	0.0001023	0.00252611	R10D12.8
WBGene00022044	1993.96	-0.391006	0.10066	-3.88442	0.000102576	0.00252847	dpm-1
WBGene00010542	1232.09	-0.420912	0.108374	-3.8839	0.000102796	0.00252944	K03H1.7
WBGene00021329	13989.9	0.359369	0.09256	3.88255	0.000103368	0.00253904	Y34D9A.3
WBGene00000176	3279.31	-0.406491	0.104723	-3.88157	0.000103785	0.00254483	aqp-8
WBGene00002144	2720.14	-0.388237	0.100073	-3.87952	0.000104662	0.0025603	inx-22
WBGene00002274	307.314	0.493149	0.127147	3.87858	0.000105069	0.0025603	lec-11
WBGene00005002	868.207	-0.451893	0.116509	-3.87862	0.00010505	0.0025603	spp-17
WBGene00008483	134.305	0.68476	0.176558	3.8784	0.000105147	0.0025603	E04D5.4
WBGene00012644	20835.3	0.420732	0.108538	3.87637	0.000106028	0.00257726	rabx-5
WBGene00013703	10830.3	0.28603	0.0738328	3.87403	0.000107052	0.00259314	rbm-12
WBGene00015660	1516.77	0.368424	0.0950922	3.87438	0.000106894	0.00259314	catp-3
WBGene00020322	792.75	-0.571411	0.114031	-5.01101	5.41456e-07	4.73808e-05	T07F12.2
WBGene00001303	4036.32	-0.427973	0.110844	-3.86104	0.000112904	0.00272077	sec-61.G
WBGene00016966	2004.8	-0.432344	0.111976	-3.86105	0.000112901	0.00272077	aipr-1
WBGene00002044	2151.75	-0.460755	0.119382	-3.85951	0.000113616	0.00272863	hyl-2
WBGene00004304	39344.2	0.441035	0.114273	3.8595	0.00011362	0.00272863	ran-3
WBGene00008016	94.0217	-0.570471	0.167177	-3.41238	0.000643992	0.00904367	C38D9.8
WBGene00013391	1419.28	-0.56981	0.144164	-3.95251	7.73344e-05	0.00202007	Y62H9A.3
WBGene00010230	812.85	-0.569214	0.138636	-4.10581	4.02906e-05	0.00124803	rpac-19
WBGene00008140	10331.6	0.339923	0.0882951	3.84985	0.000118192	0.00281909	xpf-1
WBGene00005685	19.4529	0.760065	0.197451	3.84938	0.000118418	0.00281968	sru-22
WBGene00020688	348.806	-0.460597	0.11975	-3.84632	0.000119906	0.00285026	cest-6
WBGene00014000	1218.13	-0.4461	0.116	-3.8457	0.000120209	0.00285262	ZK550.6
WBGene00021063	1380.03	-0.414962	0.107959	-3.84371	0.000121186	0.00287095	sbds-1
WBGene00010061	45559.5	0.270667	0.0704442	3.84229	0.000121893	0.00288281	F54E12.2
WBGene00010850	2782.74	0.372438	0.0969607	3.84112	0.000122472	0.00289163	M04C3.1
WBGene00001747	44093.2	0.420559	0.109574	3.83812	0.000123978	0.00292225	gsp-1
WBGene00014965	4736.14	0.324872	0.0846577	3.83748	0.000124303	0.00292499	Y106G6D.5
WBGene00003771	146.232	-0.568821	0.153883	-3.69644	0.000218645	0.00446897	nlp-33
WBGene00017372	8882.79	0.310727	0.0810361	3.83443	0.000125855	0.00295158	F10G7.9
WBGene00001284	18168	0.30262	0.0789464	3.83323	0.000126471	0.00296107	emb-30
WBGene00017459	224.467	-0.568257	0.156512	-3.63076	0.000282587	0.00521277	F14D2.11
WBGene00000063	1516.16	-0.568226	0.128041	-4.43785	9.08601e-06	0.000409348	act-1
WBGene00015159	3757.11	-0.305131	0.0797266	-3.82722	0.000129601	0.00301737	psd-1
WBGene00015553	27505	0.506447	0.132337	3.82696	0.000129738	0.00301737	trxr-1
WBGene00021392	1283.46	-0.567966	0.123792	-4.58805	4.47405e-06	0.000236382	Y38A10A.7
WBGene00001830	33383.4	0.403124	0.105463	3.82244	0.000132139	0.00306155	hcp-2
WBGene00008375	338.124	-0.567285	0.128516	-4.41413	1.01418e-05	0.000440981	D1054.8
WBGene00018294	20507.4	0.389777	0.102014	3.82081	0.000133012	0.0030731	atg-18
WBGene00004881	14558.1	0.256161	0.0670735	3.8191	0.000133939	0.00308942	smg-3
WBGene00000205	1250.08	-0.566965	0.112401	-5.04413	4.55601e-07	4.24179e-05	arx-7
WBGene00004856	167.844	-0.492112	0.128974	-3.81559	0.000135859	0.00312343	sma-2
WBGene00023500	352.595	-0.483946	0.126882	-3.81415	0.000136651	0.00313648	C11H1.9
WBGene00016138	1803.66	-0.301491	0.0790762	-3.81266	0.000137478	0.00315029	flh-2
WBGene00010608	2140.79	-0.56492	0.122973	-4.59384	4.35172e-06	0.000233803	K07A1.1
WBGene00000110	13278.6	0.304738	0.0800033	3.80906	0.000139494	0.00318607	alh-4
WBGene00008782	117.754	-0.564866	0.160796	-3.51295	0.000443167	0.00714836	sdz-14
WBGene00000644	371.425	0.55162	0.144878	3.80748	0.000140389	0.00319607	col-68
WBGene00010337	1837.5	0.383462	0.100728	3.80693	0.000140705	0.00319806	serp-1.1
WBGene00003123	2338.36	-0.454763	0.119501	-3.80553	0.000141502	0.00321097	mag-1
WBGene00003982	24912.6	0.348707	0.0916807	3.80349	0.000142671	0.00323226	pes-9
WBGene00006704	16156.3	-0.391717	0.103068	-3.80057	0.000144362	0.00326529	ubc-7
WBGene00007333	31564	0.277983	0.0731697	3.79915	0.000145193	0.00327351	ufd-3
WBGene00011573	652.984	-0.483268	0.127192	-3.79952	0.000144979	0.00327351	anmt-3
WBGene00003144	18569.3	0.359869	0.0947639	3.79753	0.000146145	0.00328967	max-2
WBGene00020700	42.8863	0.756492	0.199292	3.79591	0.000147104	0.00330595	T22F3.11
WBGene00022515	405.292	-0.563419	0.140597	-4.00733	6.14093e-05	0.00171273	ttr-48
WBGene00012240	238.847	-0.452719	0.119457	-3.78981	0.000150765	0.00337738	W04A8.5
WBGene00010759	470.467	-0.55956	0.13977	-4.00344	6.24274e-05	0.00173766	cysl-2
WBGene00003891	51182.2	0.457535	0.120772	3.78841	0.000151616	0.00338162	osm-11
WBGene00010495	234.727	-0.558965	0.128901	-4.33639	1.44845e-05	0.000576712	K02B12.2
WBGene00050943	213.539	0.601848	0.158897	3.78766	0.000152071	0.00338497	ZC412.10
WBGene00044094	4877.52	-0.31498	0.0831696	-3.7872	0.000152354	0.00338589	fitm-2
WBGene00007362	2505.58	0.295365	0.0780632	3.78367	0.000154535	0.00342892	cyp-35C1
WBGene00004487	3230.76	-0.558916	0.117001	-4.77701	1.77917e-06	0.00011895	rps-18
WBGene00001949	1187.12	-0.438801	0.11609	-3.77984	0.00015693	0.00346862	hlh-2
WBGene00007574	377.192	-0.45581	0.120597	-3.77962	0.000157068	0.00346862	C14B1.3
WBGene00020901	946.954	0.386903	0.10239	3.7787	0.000157648	0.00347595	T28F2.2
WBGene00001392	1046.67	-0.558508	0.114765	-4.86655	1.13563e-06	8.53495e-05	far-8
WBGene00006635	149.167	-0.556127	0.156925	-3.5439	0.000394248	0.00654789	tsp-9
WBGene00022775	4225.66	-0.397261	0.105295	-3.77284	0.000161397	0.00354189	ZK616.5
WBGene00007907	3832.87	0.312422	0.0828468	3.77108	0.00016254	0.00356139	C34B4.2
WBGene00001088	1591.99	-0.434116	0.115156	-3.76982	0.000163366	0.00357388	dpy-30
WBGene00009366	20040	0.28149	0.0746962	3.76846	0.000164258	0.0035878	F33H2.2
WBGene00013360	4525.3	-0.364547	0.0967571	-3.76765	0.000164793	0.00359388	tmed-4
WBGene00004206	11124.7	0.356768	0.094721	3.76651	0.000165543	0.00360055	pst-1
WBGene00008167	4306.35	0.456452	0.121198	3.76618	0.000165766	0.00360055	acox-1.5
WBGene00014117	5904.75	-0.367805	0.0976641	-3.76602	0.000165871	0.00360055	clec-91
WBGene00012466	16303.2	0.396569	0.105387	3.76297	0.000167905	0.00363906	ippk-1
WBGene00007506	352.121	-0.555991	0.147775	-3.76242	0.000168277	0.00364149	fbxc-58
WBGene00011308	4471.03	0.374297	0.0995008	3.76175	0.00016873	0.00364565	pnn-1
WBGene00003509	225.006	-0.55551	0.140878	-3.94319	8.04042e-05	0.00207318	mxl-1
WBGene00020183	1290.44	0.388216	0.103343	3.75659	0.000172245	0.00371017	T03D3.5
WBGene00000917	6574.62	0.498595	0.132803	3.75439	0.000173761	0.00373446	daf-25
WBGene00007609	562.074	-0.550998	0.133144	-4.13836	3.49805e-05	0.00112331	C15C8.7
WBGene00009182	483.544	0.466477	0.124274	3.75363	0.000174295	0.00373708	F26H11.4
WBGene00010044	4855.03	0.340974	0.0908974	3.7512	0.000175994	0.00376772	F54C9.9
WBGene00011044	3898.46	0.385741	0.102875	3.74962	0.000177102	0.00378565	R05H10.3
WBGene00013021	7666.81	0.419108	0.111809	3.74842	0.000177954	0.00379808	ints-8
WBGene00017435	13889.3	0.306467	0.0818019	3.74645	0.000179354	0.00382212	F13H8.2
WBGene00013284	556.966	-0.550335	0.111907	-4.91778	8.75309e-07	6.88495e-05	daf-22
WBGene00017971	978.194	0.450364	0.12027	3.74462	0.000180666	0.00383472	F32A5.8
WBGene00022865	4544.53	0.279449	0.0746219	3.74487	0.000180491	0.00383472	ufbp-1
WBGene00008720	14050.2	0.328216	0.0876676	3.74387	0.000181207	0.00383824	F12F6.1
WBGene00001061	11156	0.315595	0.0844616	3.73655	0.000186561	0.00394569	dpl-1
WBGene00004879	26393.8	0.383556	0.102729	3.73365	0.000188721	0.00398534	smg-1
WBGene00013235	10984.1	0.282484	0.0757381	3.72975	0.000191673	0.0040355	Y56A3A.16
WBGene00016004	1650.15	-0.366099	0.0981564	-3.72975	0.000191669	0.0040355	C18H9.6
WBGene00004750	3701.67	0.356689	0.0957919	3.72358	0.000196419	0.00412302	sea-1
WBGene00007774	464.293	-0.477909	0.128341	-3.72376	0.000196277	0.00412302	C27C12.4
WBGene00007963	2610.75	0.396137	0.106461	3.72097	0.000198456	0.00414096	cyp-25A1
WBGene00010209	521	0.435555	0.117041	3.72138	0.000198139	0.00414096	fbxa-191
WBGene00013263	407.028	-0.548958	0.138949	-3.9508	7.78891e-05	0.002027	txdc-12.1
WBGene00021559	6726.72	0.377846	0.101515	3.72205	0.000197609	0.00414096	Y45G5AM.7
WBGene00002125	3479.75	-0.290809	0.0782467	-3.71656	0.000201951	0.00419267	inx-3
WBGene00006863	630.11	-0.455819	0.122625	-3.71716	0.000201473	0.00419267	gyg-1
WBGene00007413	19331.9	0.355043	0.0955447	3.71599	0.000202413	0.00419267	pro-2
WBGene00008399	9561.86	0.315545	0.0849021	3.71657	0.000201943	0.00419267	D2005.4
WBGene00016417	206.202	0.552061	0.148565	3.71596	0.000202431	0.00419267	C34F11.8
WBGene00001193	894.659	-0.409293	0.110347	-3.70914	0.000207963	0.00429453	egl-26
WBGene00007679	267.835	-0.468161	0.126216	-3.70921	0.000207906	0.00429453	C18D11.1
WBGene00001157	1305.6	0.416008	0.112207	3.7075	0.000209318	0.00430981	ech-8
WBGene00017178	4918.7	0.423647	0.11426	3.70774	0.000209118	0.00430981	atg-16.1
WBGene00021248	10342.8	-0.394714	0.106561	-3.7041	0.000212139	0.00436146	Y22D7AL.10
WBGene00009813	1651.9	-0.548628	0.101622	-5.39869	6.71293e-08	9.21449e-06	haly-1
WBGene00017887	1029.63	-0.380285	0.102708	-3.70259	0.00021341	0.00437475	F28B3.6
WBGene00009180	19761.7	0.337331	0.0911909	3.69918	0.000216299	0.00442749	nurf-1
WBGene00017999	298.723	-0.54663	0.161079	-3.39355	0.000689939	0.0095642	emc-6
WBGene00016321	2147.18	0.435744	0.117928	3.695	0.000219884	0.00448122	tppp-1
WBGene00021543	2237.13	0.458189	0.123995	3.69523	0.000219685	0.00448122	Y43B11AR.1
WBGene00007649	6316.98	0.394721	0.106861	3.69379	0.000220933	0.00449331	C17G1.2
WBGene00044305	7242.73	0.322983	0.0874446	3.69358	0.000221119	0.00449331	rad-8
WBGene00001950	95.2057	-0.546454	0.158124	-3.45586	0.000548543	0.00813576	hlh-3
WBGene00045483	1267.46	-0.37786	0.102383	-3.69066	0.000223675	0.00453209	oxy-5
WBGene00014025	2018.27	-0.377321	0.102273	-3.68937	0.000224814	0.0045355	asna-1
WBGene00018765	1402.37	-0.483162	0.130972	-3.68905	0.000225089	0.0045355	mpc-2
WBGene00020218	1415.46	-0.489694	0.132724	-3.68956	0.000224639	0.0045355	T04G9.7
WBGene00010424	605.755	-0.542665	0.145827	-3.72129	0.000198211	0.00414096	lep-5
WBGene00009980	5086.82	-0.280916	0.0761643	-3.68829	0.00022577	0.00454168	F53F1.2
WBGene00001682	1467.34	-0.541691	0.125012	-4.33311	1.47019e-05	0.00058312	gpc-2
WBGene00000189	408.286	-0.464773	0.126116	-3.68529	0.000228444	0.00455529	arl-5
WBGene00007384	710.159	0.53821	0.146021	3.68583	0.000227959	0.00455529	swt-3
WBGene00007650	1119.01	-0.389424	0.105662	-3.68557	0.000228196	0.00455529	ugt-23
WBGene00019003	4730.42	-0.404694	0.109823	-3.68498	0.000228724	0.00455529	tmed-3
WBGene00022750	20964.4	0.24655	0.0669023	3.68522	0.000228503	0.00455529	tres-1
WBGene00012829	591.261	-0.541194	0.11143	-4.8568	1.19298e-06	8.83752e-05	Y43F8C.7
WBGene00021594	216.99	0.515167	0.139819	3.68452	0.000229138	0.00455705	tig-3
WBGene00010055	2767.72	-0.539299	0.0982047	-5.49158	3.98358e-08	5.8098e-06	dhgd-1
WBGene00015102	138612	0.338421	0.091889	3.68293	0.000230565	0.00457243	cpg-2
WBGene00022153	4892.56	0.347548	0.0943923	3.68195	0.000231454	0.00458357	Y71G12B.13
WBGene00007980	29322.8	0.273429	0.0743804	3.67608	0.000236841	0.0046795	C36E8.1
WBGene00009052	10508.5	0.296744	0.0807258	3.67595	0.000236966	0.0046795	ekl-1
WBGene00000966	638.802	0.514291	0.140063	3.67187	0.000240786	0.0047349	dhs-2
WBGene00015695	1367.87	-0.538897	0.108018	-4.98897	6.07032e-07	5.24633e-05	ugt-26
WBGene00017322	1218.47	-0.312451	0.085088	-3.67209	0.000240577	0.0047349	clec-160
WBGene00007965	13663.3	0.249902	0.0680923	3.67004	0.000242509	0.00475146	C36A4.4
WBGene00009092	10997.8	0.426843	0.116293	3.6704	0.000242172	0.00475146	tomm-20
WBGene00022546	86.3961	0.66615	0.181517	3.6699	0.000242646	0.00475146	ZC196.2
WBGene00016148	937.928	-0.425113	0.115876	-3.6687	0.000243785	0.00476709	C26F1.3
WBGene00017926	777.461	-0.47237	0.128796	-3.66758	0.000244857	0.00477471	cox-6C
WBGene00206354	177.777	0.649916	0.177196	3.66778	0.000244667	0.00477471	F27E5.9
WBGene00012234	16069.2	0.295675	0.0807198	3.66298	0.000249294	0.00485446	ints-4
WBGene00007586	26716	0.273677	0.0747275	3.66233	0.000249928	0.00486005	ril-2
WBGene00007882	1671.74	-0.395868	0.108183	-3.65923	0.000252973	0.00491244	C33A12.3
WBGene00001023	56700	0.314999	0.0861222	3.65758	0.000254612	0.00493742	dnj-5
WBGene00012299	707.096	-0.399739	0.109312	-3.65687	0.000255315	0.00494422	W06D11.1
WBGene00000003	349.111	-0.491503	0.134632	-3.65073	0.000261499	0.00498776	aat-2
WBGene00000245	307.42	-0.443065	0.121355	-3.65099	0.00026123	0.00498776	bca-1
WBGene00003821	19828.6	0.279896	0.0766351	3.65232	0.00025988	0.00498776	nst-1
WBGene00008288	2050.76	-0.394535	0.10808	-3.65039	0.000261838	0.00498776	C54C6.6
WBGene00010350	655.556	0.492815	0.134962	3.65151	0.000260706	0.00498776	H01G02.3
WBGene00007107	454.803	-0.538729	0.153837	-3.50194	0.000461877	0.00734039	pfd-4
WBGene00012121	11808.5	0.411251	0.112625	3.6515	0.000260714	0.00498776	T28C6.7
WBGene00016501	7447.09	-0.378023	0.103487	-3.65285	0.000259345	0.00498776	C37C3.9
WBGene00018446	2579.89	0.429907	0.117688	3.65294	0.000259258	0.00498776	ceh-83
WBGene00013516	296.205	-0.538623	0.154252	-3.49183	0.000479726	0.00750463	Y73F4A.3
WBGene00022450	5495.92	0.408859	0.111923	3.65305	0.000259139	0.00498776	ubc-26
WBGene00020155	770.804	-0.538439	0.120612	-4.46421	8.03645e-06	0.000370126	T02B11.3
WBGene00021826	2472.2	-0.391086	0.107163	-3.64947	0.000262784	0.00499896	txl-1
WBGene00004302	33712.3	-0.321124	0.0880099	-3.64873	0.000263543	0.0050066	ran-1
WBGene00010624	1094.03	-0.378428	0.103727	-3.6483	0.000263986	0.00500822	mrps-15
WBGene00019381	1380.74	-0.537794	0.129445	-4.15461	3.25844e-05	0.0010752	K04C2.3
WBGene00009051	1132.38	-0.484608	0.132881	-3.64694	0.000265383	0.00502111	nduf-6
WBGene00010637	1457.27	-0.311912	0.0855489	-3.646	0.00026635	0.00502156	K07F5.12
WBGene00013463	6930.58	0.468008	0.128364	3.64594	0.000266419	0.00502156	kdp-1
WBGene00020113	1025.1	-0.414703	0.113746	-3.64588	0.000266482	0.00502156	R151.10
WBGene00010062	544.793	0.726868	0.199455	3.64426	0.000268163	0.00503342	lipl-1
WBGene00010828	12389.5	-0.266256	0.0730656	-3.64406	0.00026837	0.00503342	M02B1.3
WBGene00013075	4853.5	0.36641	0.100536	3.64456	0.000267853	0.00503342	ints-5
WBGene00015146	27347.1	0.413696	0.113531	3.64389	0.00026855	0.00503342	abi-1
WBGene00011801	367.363	0.453038	0.124394	3.64197	0.000270564	0.0050644	T16G1.7
WBGene00000766	4894.93	0.278477	0.0764969	3.64038	0.00027224	0.00508896	coq-6
WBGene00007516	742.425	-0.365999	0.100596	-3.63831	0.00027443	0.00511418	gpx-5
WBGene00018475	480.624	-0.461354	0.126792	-3.63866	0.00027406	0.00511418	mrpl-14
WBGene00220049	57.7243	0.650352	0.178763	3.63807	0.000274685	0.00511418	R106.7
WBGene00012156	1968.98	-0.535579	0.105586	-5.07242	3.92796e-07	3.79279e-05	ebp-2
WBGene00008142	86.7517	0.632659	0.173961	3.63678	0.000276065	0.00512501	C47E8.3
WBGene00011625	37996.7	0.319381	0.0878263	3.6365	0.000276365	0.00512501	vps-39
WBGene00004822	176.96	-0.535326	0.153546	-3.48642	0.000489526	0.00756455	skr-16
WBGene00012663	10530.2	0.283697	0.0781128	3.6319	0.000281347	0.00520361	hex-3
WBGene00010216	40.9036	0.731223	0.20139	3.63089	0.00028245	0.00521277	F57G8.7
WBGene00017730	403.85	-0.534754	0.120685	-4.431	9.37976e-06	0.000418236	F22H10.6
WBGene00001674	530.042	0.459166	0.126542	3.62858	0.000284989	0.00522268	gpa-12
WBGene00009594	30544.2	0.300467	0.0827849	3.62949	0.000283986	0.00522268	cyld-1
WBGene00001244	15395.1	-0.534465	0.121873	-4.38542	1.15765e-05	0.000491159	elo-6
WBGene00021260	648.348	0.462255	0.127375	3.62908	0.000284432	0.00522268	Y22D7AR.6
WBGene00021709	1063.27	-0.329222	0.0907151	-3.62918	0.000284319	0.00522268	ugt-29
WBGene00022334	280.477	-0.534302	0.138675	-3.85289	0.00011673	0.00278897	Y82E9BR.1
WBGene00000178	4674.42	0.396736	0.1094	3.62649	0.0002873	0.00525129	aqp-10
WBGene00017062	1988.32	-0.395902	0.109252	-3.62375	0.000290359	0.00530028	glrx-3
WBGene00006568	14078.4	0.380266	0.104953	3.6232	0.000290979	0.00530469	thk-1
WBGene00007605	3643.15	-0.499321	0.137827	-3.6228	0.000291428	0.00530596	hrg-7
WBGene00008838	283.925	-0.431315	0.119071	-3.62233	0.000291962	0.00530878	F15A4.2
WBGene00017344	770.609	0.407866	0.112609	3.62195	0.000292393	0.00530973	F10E7.2
WBGene00017532	1396.83	-0.378113	0.10444	-3.62038	0.000294167	0.00533502	ent-5
WBGene00009881	966.17	-0.464464	0.128318	-3.61962	0.000295039	0.00534392	F49C12.12
WBGene00011388	3235.04	0.374624	0.103531	3.61846	0.00029636	0.00535398	T02G6.5
WBGene00017757	1343.23	-0.406054	0.11221	-3.61869	0.000296094	0.00535398	bra-2
WBGene00019006	1907.69	0.26595	0.0735504	3.61589	0.000299316	0.00540041	spg-20
WBGene00000146	42314.7	0.444062	0.122844	3.61483	0.000300548	0.00541275	ape-1
WBGene00012383	568.043	-0.469733	0.129953	-3.61463	0.000300773	0.00541275	ttr-17
WBGene00003812	27719.7	0.608702	0.168535	3.61172	0.000304171	0.00546687	nrf-5
WBGene00016390	774.515	-0.533671	0.131795	-4.04924	5.13851e-05	0.00149262	ttc-1
WBGene00011934	153.778	0.560552	0.155257	3.61049	0.000305624	0.00548088	T22H2.4
WBGene00077692	36.3424	0.72683	0.201335	3.61006	0.000306125	0.00548088	C08E8.10
WBGene00004680	14106.6	0.345164	0.0956206	3.60972	0.000306526	0.00548107	rars-2
WBGene00009380	774.519	-0.419201	0.116172	-3.60844	0.000308041	0.00550113	F34H10.3
WBGene00006376	2039.68	-0.354171	0.0981734	-3.60761	0.00030903	0.00551176	syp-2
WBGene00017315	56.2072	0.67579	0.187442	3.60533	0.000311757	0.00555333	ugt-36
WBGene00000896	1518.53	-0.532866	0.130244	-4.09129	4.28985e-05	0.00132005	dad-1
WBGene00045433	2805.43	0.316161	0.087728	3.60388	0.000313498	0.00557016	F49D11.10
WBGene00010277	1118.92	-0.422177	0.117178	-3.60287	0.000314723	0.00558483	F58G6.7
WBGene00016027	5365.38	-0.274734	0.0762852	-3.6014	0.000316505	0.00560936	C23H5.8
WBGene00019550	1089.22	-0.531623	0.12661	-4.1989	2.68215e-05	0.00093882	K09C4.5
WBGene00023414	201.669	-0.530748	0.151475	-3.50387	0.000458557	0.00732071	R01H2.7
WBGene00000834	19979.8	0.262193	0.0728993	3.59665	0.000322344	0.00568466	cua-1
WBGene00003389	16050.1	0.236469	0.0657574	3.59608	0.000323045	0.00568466	mog-1
WBGene00008665	428.398	-0.423097	0.117645	-3.59638	0.000322672	0.00568466	ercc-1
WBGene00016641	255.143	-0.526898	0.127076	-4.14631	3.3787e-05	0.00110012	C44C1.1
WBGene00004420	11955.5	-0.402053	0.111933	-3.59189	0.000328286	0.00576704	rpl-9
WBGene00008990	33372.3	0.255972	0.0713176	3.58919	0.000331709	0.00581987	smgl-1
WBGene00013407	10493.6	0.404161	0.112658	3.5875	0.000333869	0.00585044	fld-1
WBGene00000875	17254.7	0.596349	0.166278	3.58645	0.000335209	0.00586657	cyk-4
WBGene00001455	459.252	0.575083	0.160497	3.58314	0.000339484	0.00591875	flp-12
WBGene00016631	2613.8	0.275193	0.076791	3.58366	0.000338809	0.00591875	C44B7.11
WBGene00017010	4751.55	0.331887	0.0926335	3.58279	0.000339942	0.00591875	D1007.15
WBGene00019686	1201.2	-0.524691	0.106029	-4.94854	7.47735e-07	6.10029e-05	K12H6.6
WBGene00022718	39020.1	0.344272	0.096072	3.58348	0.000339041	0.00591875	ZK370.4
WBGene00012992	1417.23	-0.498392	0.139145	-3.58183	0.000341201	0.00592699	mrpl-20
WBGene00000547	5550.12	0.27576	0.0770859	3.57731	0.000347146	0.00601534	clp-7
WBGene00044604	341.466	-0.524171	0.149731	-3.50075	0.000463947	0.0073481	T10F2.5
WBGene00009531	813.33	-0.523015	0.131079	-3.99006	6.60554e-05	0.00181342	F38B2.4
WBGene00015413	3090.68	-0.335104	0.0937626	-3.57396	0.000351622	0.00607784	pdhb-1
WBGene00004203	22563.5	0.356456	0.0997697	3.57279	0.0003532	0.0060976	swsn-1
WBGene00008926	1142.93	-0.522231	0.101913	-5.12431	2.98631e-07	3.05161e-05	F17H10.2
WBGene00015462	7358.02	0.334698	0.0937513	3.57006	0.0003569	0.00614632	C05C8.5
WBGene00000712	38.1479	0.712352	0.199564	3.56955	0.000357601	0.00615083	col-139
WBGene00001032	1709.04	-0.353486	0.0990819	-3.56761	0.00036025	0.00618261	dnj-14
WBGene00002268	2700.83	-0.521681	0.0861751	-6.05373	1.41525e-09	3.35847e-07	lec-5
WBGene00005643	444.022	-0.394442	0.110582	-3.56695	0.000361155	0.00618915	srp-2
WBGene00001402	4905.7	0.442595	0.124136	3.56542	0.000363276	0.00621788	fbf-2
WBGene00011985	8846.14	0.277448	0.0778355	3.56454	0.000364489	0.00622947	T24D1.2
WBGene00012934	8978.18	0.275584	0.0773181	3.56429	0.000364843	0.00622947	gly-9
WBGene00003623	137.362	-0.519981	0.150422	-3.45682	0.000546595	0.00812407	nhr-25
WBGene00020346	9283.82	0.341306	0.0958316	3.56152	0.000368714	0.00628024	rbm-5
WBGene00004186	16441	0.230295	0.0646756	3.56076	0.000369777	0.0062907	prpf-4
WBGene00022057	2589.33	0.300745	0.0844771	3.56007	0.000370752	0.00629964	Y67D2.7
WBGene00017811	9761.71	0.344837	0.0968817	3.55936	0.000371763	0.00630915	nonu-1
WBGene00001746	29528.5	0.371152	0.104298	3.55859	0.000372856	0.00632004	gsk-3
WBGene00003076	768.198	-0.465031	0.130747	-3.55671	0.000375528	0.00635166	lsm-1
WBGene00008687	944.417	-0.374566	0.105316	-3.55659	0.000375705	0.00635166	F11A10.6
WBGene00018402	97.3069	0.62117	0.174666	3.55632	0.000376082	0.00635166	kvs-3
WBGene00009661	59945.6	0.282321	0.0794715	3.55248	0.000381624	0.00642202	patr-1
WBGene00010229	2920.51	0.425611	0.119789	3.55301	0.000380857	0.00642202	F58A4.6
WBGene00011587	3073.6	-0.334248	0.094088	-3.5525	0.000381584	0.00642202	anp-1
WBGene00015789	429.043	-0.519957	0.127799	-4.06857	4.7303e-05	0.00140913	syx-6
WBGene00012555	2756.37	-0.386766	0.108941	-3.55023	0.000384893	0.00646615	npp-25
WBGene00017765	9642.76	0.289138	0.0814767	3.54871	0.000387117	0.00649104	gcst-1
WBGene00001632	6500.14	0.284924	0.0803403	3.54646	0.000390447	0.00653124	gly-7
WBGene00006474	1834.35	-0.455079	0.128314	-3.5466	0.000390242	0.00653124	wdr-5.1
WBGene00017970	2074.71	0.463632	0.130761	3.54563	0.000391675	0.00654396	F32A5.4
WBGene00000041	79821.9	0.384909	0.108586	3.54475	0.000392993	0.00654789	aco-2
WBGene00001636	327.134	-0.452206	0.127584	-3.54436	0.000393564	0.00654789	gly-11
WBGene00008922	1013.63	-0.5195	0.120479	-4.31195	1.61819e-05	0.000633993	F17C11.11
WBGene00017348	603.821	-0.517832	0.124652	-4.15423	3.26378e-05	0.0010752	F10E7.6
WBGene00007390	1715.96	-0.517486	0.117717	-4.39602	1.10252e-05	0.00047203	lmtr-3
WBGene00003702	287.329	0.445072	0.125621	3.54298	0.000395632	0.00655531	nhr-112
WBGene00004979	550.494	-0.402163	0.113507	-3.54307	0.000395505	0.00655531	sph-1
WBGene00001779	34.806	0.711483	0.201158	3.53694	0.000404787	0.00669863	gst-31
WBGene00016745	251.26	-0.456843	0.129174	-3.53665	0.000405238	0.00669863	C48B6.9
WBGene00009627	16851.9	0.372996	0.105481	3.53616	0.000405996	0.00670256	cup-15
WBGene00010815	23925.8	0.388052	0.109747	3.53587	0.000406433	0.00670256	M01F1.9
WBGene00003372	1096.58	-0.517434	0.116859	-4.42784	9.51807e-06	0.000420387	mlc-4
WBGene00009453	1298.14	-0.337369	0.0955248	-3.53174	0.000412832	0.00679131	F36A2.3
WBGene00013248	1431.63	0.463841	0.131345	3.53146	0.00041327	0.00679131	Y57A10A.3
WBGene00008316	965.308	-0.499609	0.141622	-3.52775	0.000419101	0.00687408	dod-18
WBGene00195239	246.131	-0.491262	0.139261	-3.52764	0.000419289	0.00687408	ZK1127.13
WBGene00001073	15756.2	0.388413	0.110129	3.52688	0.000420485	0.00688562	dpy-11
WBGene00018046	855.886	-0.434904	0.123372	-3.52515	0.000423246	0.00692274	coa-3
WBGene00011367	2341.06	-0.34039	0.096595	-3.52389	0.000425259	0.00694756	snpc-3.4
WBGene00001229	9198.37	-0.317075	0.0900551	-3.5209	0.000430077	0.00700907	eif-3.F
WBGene00013046	206.875	0.535386	0.15205	3.52111	0.000429752	0.00700907	Y50E8A.1
WBGene00022850	1504.82	-0.386617	0.109815	-3.52063	0.000430526	0.00700907	ZK1127.3
WBGene00003792	36326.1	0.263902	0.0750015	3.51862	0.0004338	0.00705415	npp-6
WBGene00003184	2500.89	-0.463519	0.131751	-3.51814	0.000434586	0.00705825	mei-2
WBGene00007194	174.354	-0.515544	0.143031	-3.60442	0.000312855	0.0055658	dph-5
WBGene00010747	245.43	0.562222	0.159906	3.51594	0.000438199	0.00710095	K10D11.3
WBGene00009033	14.4093	0.687004	0.195469	3.51464	0.000440343	0.00712745	F21H7.12
WBGene00009165	526.127	-0.425675	0.121147	-3.51372	0.000441882	0.00714411	gpx-1
WBGene00011029	691.735	-0.37985	0.108118	-3.51328	0.000442608	0.00714758	abhd-11.2
WBGene00010870	242.137	-0.515028	0.135226	-3.80864	0.000139733	0.00318633	let-522
WBGene00009588	967.022	-0.514244	0.126208	-4.07457	4.60999e-05	0.00138805	F40F11.3
WBGene00000987	6305.61	0.274178	0.0780975	3.51071	0.000446904	0.00717915	dhs-24
WBGene00008220	641.73	0.50741	0.144537	3.51058	0.000447126	0.00717915	C50B6.7
WBGene00013718	12509.6	0.351407	0.100095	3.51075	0.000446845	0.00717915	pdpr-1
WBGene00016116	7946.99	0.254202	0.0724424	3.50902	0.000449755	0.00721307	C25H3.7
WBGene00013139	878.684	-0.51404	0.123147	-4.17418	2.9906e-05	0.0010049	Y53C12A.3
WBGene00011898	10442.6	-0.400417	0.114189	-3.50661	0.000453848	0.00726209	T21C9.13
WBGene00002084	150.004	0.551981	0.15743	3.50619	0.000454569	0.00726532	ins-1
WBGene00045246	327.615	-0.513594	0.139223	-3.689	0.000225139	0.0045355	C29E4.15
WBGene00008944	1693.85	0.471291	0.13454	3.50298	0.000460088	0.00733677	F19B2.5
WBGene00004489	3760.33	-0.513183	0.105752	-4.85271	1.21787e-06	8.95642e-05	rps-20
WBGene00019963	204.588	-0.512534	0.151141	-3.3911	0.000696134	0.00960254	rips-1
WBGene00021473	272.346	0.469115	0.133948	3.50222	0.000461392	0.00734039	sydn-1
WBGene00007573	1075.16	-0.475852	0.135903	-3.50142	0.000462789	0.00734639	C14B1.2
WBGene00014031	392.696	-0.511451	0.118623	-4.31156	1.6211e-05	0.000633993	ZK637.14
WBGene00022280	1343.95	-0.510095	0.140244	-3.63721	0.000275608	0.00512454	Y74C10AL.2
WBGene00007689	566.379	-0.445691	0.127329	-3.50029	0.000464744	0.00735241	C18E9.9
WBGene00009514	1071.67	-0.41811	0.119483	-3.49934	0.000466419	0.00736377	F37H8.5
WBGene00022646	3452.53	-0.315535	0.0901714	-3.49928	0.000466514	0.00736377	acl-9
WBGene00000256	14.6247	0.647798	0.185385	3.49434	0.000475242	0.00749308	bli-6
WBGene00003157	33834.6	0.216939	0.0621065	3.49302	0.000477596	0.007498	mcm-5
WBGene00004167	33750.4	0.325241	0.0930987	3.49351	0.000476721	0.007498	pqn-87
WBGene00018150	6449.06	-0.360657	0.103231	-3.49368	0.000476404	0.007498	epg-4
WBGene00044998	598.89	0.697825	0.19978	3.49296	0.000477695	0.007498	M199.9
WBGene00008652	1044	0.431677	0.123597	3.49262	0.000478298	0.00749905	F10D11.6
WBGene00009047	293.682	0.502048	0.143773	3.49196	0.00047949	0.00750463	F22B8.4
WBGene00194892	1898.81	-0.51003	0.119925	-4.25292	2.11e-05	0.000777425	dsb-2
WBGene00009915	6970.31	-0.387156	0.110886	-3.49149	0.000480339	0.00750584	F52A8.1
WBGene00004027	1037.8	-0.479853	0.137463	-3.49079	0.000481597	0.00751655	pie-1
WBGene00007533	14647.2	0.429724	0.123123	3.49021	0.000482636	0.00751655	cbl-1
WBGene00011434	8136.52	0.310341	0.0889135	3.49036	0.000482361	0.00751655	T04D3.5
WBGene00018862	10144.6	0.318743	0.0913456	3.48942	0.000484071	0.00753053	wago-2
WBGene00022448	6039.67	0.44566	0.12773	3.48908	0.00048469	0.00753179	pinn-1
WBGene00010075	2425.31	-0.345325	0.0989973	-3.48823	0.000486227	0.00754729	F55A11.1
WBGene00004193	668.54	-0.369588	0.105994	-3.48688	0.000488699	0.00756455	prx-3
WBGene00015167	307.635	-0.509442	0.138732	-3.67212	0.000240547	0.0047349	B0403.3
WBGene00006618	3109.15	-0.402303	0.115368	-3.48712	0.000488255	0.00756455	trt-1
WBGene00008743	83.2886	0.629262	0.180495	3.48631	0.000489741	0.00756455	fcmt-1
WBGene00019116	293.424	0.447974	0.128501	3.48614	0.00049004	0.00756455	nhr-143
WBGene00013379	2876.97	-0.367873	0.105537	-3.48571	0.000490835	0.00756848	Y62E10A.13
WBGene00011850	435.176	0.482198	0.138392	3.48429	0.000493436	0.00760021	T20B3.1
WBGene00014261	215.197	0.418795	0.12021	3.48387	0.000494216	0.00760387	shk-1
WBGene00015349	7788.16	0.283063	0.081333	3.4803	0.00050086	0.00769763	henn-1
WBGene00185067	1023.2	-0.383563	0.110237	-3.47944	0.000502457	0.0077137	Y54G11A.17
WBGene00019892	2205.82	-0.386683	0.111166	-3.47841	0.000504391	0.007718	R05F9.9
WBGene00021020	2370.56	0.435386	0.125159	3.47865	0.000503944	0.007718	W04B5.3
WBGene00045237	7589.14	0.246867	0.0709613	3.4789	0.000503478	0.007718	mrt-1
WBGene00003787	7319.22	-0.340475	0.0979035	-3.47766	0.000505812	0.0077313	npp-1
WBGene00011222	5310.74	-0.324604	0.0933512	-3.47723	0.000506624	0.00773528	R10H10.3
WBGene00004483	94664	0.39889	0.114735	3.47661	0.0005078	0.00774478	rps-14
WBGene00020693	621.557	-0.337687	0.0971687	-3.47527	0.000510348	0.00777517	lron-8
WBGene00003485	2074.38	-0.441683	0.127136	-3.47409	0.000512583	0.00780074	mua-6
WBGene00003087	777.599	-0.508704	0.115389	-4.4086	1.04039e-05	0.000450975	lsy-2
WBGene00011412	981.863	-0.416128	0.11991	-3.47033	0.000519824	0.00789376	mrpl-16
WBGene00003472	23454.6	0.266227	0.0767277	3.46976	0.000520921	0.00790186	mtk-1
WBGene00004494	2996.13	-0.436178	0.125759	-3.46836	0.000523644	0.0079281	rps-25
WBGene00021247	1582.12	0.294997	0.0850556	3.46829	0.000523783	0.0079281	Y22D7AL.9
WBGene00000763	412.259	-0.410953	0.118526	-3.4672	0.000525918	0.00795182	coq-3
WBGene00001653	28036.7	0.227094	0.0655201	3.46602	0.000528217	0.00795223	gon-4
WBGene00006707	1445.33	-0.318114	0.0917757	-3.46621	0.000527853	0.00795223	ubc-12
WBGene00015554	699.113	-0.416177	0.12005	-3.46668	0.00052692	0.00795223	C06G3.8
WBGene00017012	2516.45	-0.291891	0.0842036	-3.46649	0.000527304	0.00795223	acs-22
WBGene00000383	17727.7	0.318654	0.0919558	3.4653	0.000529645	0.00795661	cdc-14
WBGene00002027	55710.9	0.357747	0.103229	3.46556	0.000529128	0.00795661	hsr-9
WBGene00004422	79221.5	0.309603	0.0893816	3.46383	0.000532538	0.00797511	rpl-11.1
WBGene00016906	430.289	-0.414693	0.119716	-3.46398	0.000532247	0.00797511	C53D5.5
WBGene00019663	298.586	-0.508669	0.134668	-3.77721	0.000158595	0.00349134	K11H12.7
WBGene00013250	2883.66	0.351043	0.101356	3.46346	0.000533272	0.00797686	Y57A10A.5
WBGene00003060	7754.65	0.344191	0.0993986	3.46273	0.000534719	0.00798145	lpd-3
WBGene00022831	11368.2	0.348211	0.100555	3.46288	0.000534423	0.00798145	cec-10
WBGene00019102	1049.53	0.365027	0.105471	3.46091	0.000538345	0.00802701	F59C12.3
WBGene00017888	1003.81	-0.405635	0.117295	-3.45824	0.000543709	0.00809481	acl-11
WBGene00022852	4408.19	0.367818	0.106365	3.45808	0.000544048	0.00809481	ZK1127.5
WBGene00010904	8665.49	-0.50856	0.110323	-4.60974	4.03178e-06	0.000224004	ugt-62
WBGene00045171	123.976	0.647702	0.187393	3.45638	0.000547485	0.00812867	K09E9.5
WBGene00012193	933.178	-0.506898	0.110123	-4.60301	4.16423e-06	0.000228364	vps-25
WBGene00003754	539.055	0.406352	0.117605	3.45523	0.00054983	0.00814621	nlp-16
WBGene00021917	122.884	0.564978	0.163538	3.45473	0.000550845	0.00815262	Y55D5A.3
WBGene00000187	3025.65	-0.332705	0.0963334	-3.45368	0.000552998	0.00817585	arl-1
WBGene00010578	54.2488	0.675742	0.195681	3.45328	0.000553824	0.00817941	K04H8.3
WBGene00018678	4555.01	0.305788	0.0885579	3.45297	0.000554442	0.00817992	tdpo-1
WBGene00021153	2816.25	-0.43076	0.124788	-3.45194	0.000556571	0.00820268	Y4C6A.3
WBGene00011280	3224.95	0.344042	0.099684	3.45133	0.000557833	0.00821264	pelo-1
WBGene00019922	231.742	-0.50644	0.139628	-3.62706	0.00028667	0.00524662	fbxc-28
WBGene00010642	275.42	0.415363	0.120401	3.44982	0.000560963	0.00824138	mks-6
WBGene00010901	15105.6	0.434004	0.125845	3.44871	0.000563275	0.00824957	M28.10
WBGene00015853	7996.03	0.306779	0.0889563	3.44865	0.000563395	0.00824957	C16C8.16
WBGene00017436	1709.89	-0.324364	0.0940617	-3.44842	0.000563877	0.00824957	F13H8.3
WBGene00022402	829.993	-0.503981	0.114692	-4.3942	1.11183e-05	0.000473154	lmtr-2
WBGene00015297	2358.8	0.324772	0.0941995	3.44771	0.000565362	0.00826267	sco-1
WBGene00007093	9589.66	0.333531	0.0967909	3.44589	0.000569184	0.00830984	B0001.8
WBGene00000090	19968.6	0.314386	0.0913026	3.44335	0.000574565	0.00834861	age-1
WBGene00010013	37358	0.314674	0.0913775	3.44367	0.000573871	0.00834861	F54B3.1
WBGene00011629	82865	0.327113	0.094987	3.44376	0.000573682	0.00834861	T08G11.1
WBGene00012497	16780	0.326154	0.0947235	3.44323	0.000574821	0.00834861	ragc-1
WBGene00020499	297.731	-0.461619	0.13406	-3.44339	0.000574472	0.00834861	mrps-18.C
WBGene00000506	1478.52	-0.300724	0.0873574	-3.44246	0.000576453	0.00835674	cic-1
WBGene00004180	7232.11	0.288124	0.0837258	3.44128	0.000578961	0.00835674	pri-1
WBGene00007106	897.858	-0.496691	0.144331	-3.44133	0.000578858	0.00835674	B0035.3
WBGene00012481	6499.22	-0.332109	0.0964779	-3.44233	0.000576733	0.00835674	Y18D10A.11
WBGene00020229	653.019	-0.422857	0.122856	-3.44189	0.000577655	0.00835674	T05A8.3
WBGene00006619	1375.9	-0.503619	0.0918047	-5.48577	4.11673e-08	5.9421e-06	try-1
WBGene00003562	152.163	0.495536	0.144016	3.44085	0.000579892	0.00835863	ncr-2
WBGene00011741	1633.36	-0.42869	0.124605	-3.44039	0.000580883	0.00835863	T12G3.6
WBGene00015691	10393.6	0.269021	0.0781928	3.44048	0.000580674	0.00835863	viln-1
WBGene00008805	3750.46	0.231516	0.0673143	3.43933	0.000583163	0.00837327	git-1
WBGene00015183	186.204	0.580628	0.168832	3.43908	0.000583695	0.00837327	B0432.1
WBGene00021647	1042.87	-0.396571	0.115305	-3.43933	0.000583152	0.00837327	Y47G6A.22
WBGene00011809	1498.09	-0.375692	0.109317	-3.43671	0.000588821	0.00843816	T16G12.8
WBGene00012678	276.545	-0.414831	0.120753	-3.43538	0.000591734	0.00847123	zhp-4
WBGene00014987	600.636	-0.392729	0.114371	-3.43382	0.000595138	0.00851126	ZK637.6
WBGene00021377	384.321	-0.394682	0.114984	-3.4325	0.000598044	0.0085441	Y37E11B.5
WBGene00000284	157.226	0.561705	0.163722	3.43084	0.000601705	0.00858764	cah-6
WBGene00013549	5284.29	0.32049	0.0934226	3.43054	0.000602387	0.00858862	Y75B8A.13
WBGene00007499	4431.73	0.33413	0.0974244	3.42963	0.000604409	0.00860868	C09H10.5
WBGene00006735	17595.3	0.373132	0.108834	3.42846	0.000607008	0.00863691	ula-1
WBGene00019241	4491.49	0.31985	0.0933149	3.42764	0.000608848	0.0086543	trm-2A
WBGene00021827	623.313	-0.469313	0.136947	-3.42695	0.000610395	0.00866749	dnc-6
WBGene00077658	489.917	-0.434815	0.126896	-3.42653	0.000611337	0.00867207	M106.8
WBGene00008686	35513.6	0.349751	0.102133	3.42447	0.000616	0.00872937	F11A10.5
WBGene00016375	1864.23	-0.396399	0.115929	-3.41934	0.000627731	0.00888661	rpap-3
WBGene00020090	1214.63	0.38374	0.112239	3.41896	0.000628606	0.00889001	R119.5
WBGene00014171	578.038	0.380258	0.111231	3.41862	0.000629402	0.00889229	nep-26
WBGene00018904	621.62	-0.40864	0.119576	-3.4174	0.000632214	0.00892301	pycr-4
WBGene00016244	2801.48	-0.364617	0.106704	-3.41709	0.000632936	0.0089242	C30B5.2
WBGene00001352	23271.5	0.222414	0.0650966	3.41668	0.000633905	0.00892887	evl-14
WBGene00016022	237.782	0.528326	0.154781	3.41337	0.000641643	0.00902878	C23H3.9
WBGene00014917	578.804	0.369141	0.108167	3.41269	0.000643242	0.0090422	fbxa-122
WBGene00012182	2027.57	-0.502928	0.0907528	-5.54173	2.99499e-08	4.67686e-06	osta-3
WBGene00002088	36.3996	0.685082	0.20102	3.40803	0.000654345	0.00917984	ins-5
WBGene00018725	22.7721	0.671679	0.197147	3.407	0.000656813	0.00920524	kreg-1
WBGene00003676	4891.9	0.413038	0.121254	3.40638	0.000658313	0.00921705	nhr-86
WBGene00020297	16150.1	0.359513	0.105564	3.40563	0.000660113	0.00923301	nog-1
WBGene00013558	4614.44	0.30177	0.0887117	3.40169	0.000669698	0.00935773	Y75B8A.25
WBGene00020088	1974.22	0.355833	0.104646	3.40034	0.000673022	0.0093948	R119.2
WBGene00000783	380.666	0.659154	0.193907	3.39933	0.000675506	0.00941188	cpr-3
WBGene00009673	868.808	-0.460793	0.13556	-3.39917	0.000675904	0.00941188	F43G9.13
WBGene00019301	4430.29	-0.304079	0.0894605	-3.39903	0.000676262	0.00941188	K02D10.1
WBGene00014119	24430	0.260745	0.0767978	3.39522	0.000685742	0.00952586	ZK858.6
WBGene00016392	19120.3	0.288325	0.0849216	3.39519	0.000685813	0.00952586	sdha-2
WBGene00004234	640.593	0.382285	0.112625	3.39433	0.000687973	0.00954639	ptr-20
WBGene00001239	4881.12	-0.502743	0.109479	-4.59214	4.3872e-06	0.000234448	elo-1
WBGene00011038	54975.5	0.449276	0.132412	3.39301	0.000691279	0.00957329	R05H5.3
WBGene00011462	26.8498	0.678942	0.20012	3.39268	0.000692112	0.00957536	vap-2
WBGene00011193	1925.44	-0.278732	0.082188	-3.3914	0.000695367	0.00960142	algn-13
WBGene00016616	292.743	-0.427273	0.125979	-3.39163	0.000694783	0.00960142	mtpn-1
WBGene00011432	591.989	-0.502587	0.106701	-4.71025	2.47412e-06	0.000155337	sdz-30
WBGene00008710	33223.8	0.347185	0.102394	3.39068	0.000697197	0.00960773	rif-1.1
WBGene00004311	350.791	-0.408144	0.120466	-3.38804	0.000703953	0.00969129	ras-2
WBGene00003912	5994.2	-0.33665	0.0994041	-3.38668	0.000707443	0.00972977	pal-1
WBGene00000888	2668.1	0.326143	0.0963406	3.38531	0.000710969	0.00973048	cyn-12
WBGene00008298	441.142	-0.472515	0.139535	-3.38635	0.000708293	0.00973048	C54D10.3
WBGene00008878	36415.8	0.260136	0.0768412	3.38537	0.000710821	0.00973048	ppfr-1
WBGene00021781	330.398	-0.502275	0.145006	-3.46381	0.000532586	0.00797511	Y51H7C.3
WBGene00022860	429.816	0.496555	0.14667	3.38553	0.000710407	0.00973048	#N/A
WBGene00013593	6313.88	0.336374	0.0993969	3.38415	0.000713987	0.00976223	Y87G2A.1
WBGene00015818	3666.56	0.347445	0.102708	3.38285	0.000717388	0.00979917	C16A11.5
WBGene00235102	751.252	-0.420302	0.124382	-3.37912	0.000727174	0.00992316	dib-1
WBGene00004076	43744.3	0.433394	0.128308	3.37777	0.000730753	0.00996229	pod-2
WBGene00019068	795.916	-0.353706	0.104727	-3.3774	0.000731739	0.00996603	faah-3
WBGene00001236	730.823	-0.373523	0.110646	-3.37584	0.000735907	0.0100131	elc-1
WBGene00007621	8358.32	0.248469	0.0736578	3.37329	0.00074276	0.0100965	C16C2.4
WBGene00006373	16812.8	0.320637	0.0950869	3.37204	0.000746136	0.0101325	syx-5
WBGene00014160	9411.76	0.292293	0.0866955	3.37149	0.00074764	0.0101333	ZK938.3
WBGene00017541	2947.92	-0.365452	0.108393	-3.37154	0.000747504	0.0101333	F17E9.4
WBGene00012830	217.746	-0.485368	0.143983	-3.37101	0.000748935	0.010141	mrps-28
WBGene00004917	3935.98	-0.351246	0.10423	-3.36991	0.000751914	0.0101713	snr-4
WBGene00022127	3866.51	-0.264136	0.0783867	-3.36966	0.000752623	0.0101713	yop-1
WBGene00021246	4244.63	0.347982	0.10332	3.36801	0.000757138	0.0102225	Y22D7AL.7
WBGene00016453	3154.05	-0.309968	0.0920663	-3.36679	0.000760479	0.0102478	vet-2
WBGene00018923	1823.39	0.304344	0.0903912	3.36696	0.000760015	0.0102478	eme-1
WBGene00008078	1702.29	0.269987	0.0802119	3.36592	0.000762883	0.0102622	vps-50
WBGene00017002	132.349	-0.584971	0.173795	-3.36587	0.000763017	0.0102622	D1007.4
WBGene00016408	17398.3	0.242094	0.0719638	3.36411	0.000767903	0.0103181	prmt-5
WBGene00019478	554.693	-0.456019	0.135614	-3.36263	0.000772041	0.0103637	cri-2
WBGene00007192	5593.2	-0.326838	0.0972397	-3.36116	0.00077616	0.010409	nduf-11
WBGene00010134	3083.08	0.341412	0.101607	3.36014	0.000779025	0.0104275	F55H12.3
WBGene00016407	7719.95	0.348332	0.10366	3.36033	0.000778488	0.0104275	unk-1
WBGene00001059	221.476	-0.512957	0.152676	-3.35977	0.000780071	0.0104315	dpf-6
WBGene00012004	529.514	-0.519056	0.15452	-3.35915	0.000781836	0.010441	dyrb-1
WBGene00016088	459.966	-0.481142	0.14324	-3.35899	0.000782273	0.010441	clec-266
WBGene00014242	48.9658	-0.66231	0.1972	-3.35857	0.000783469	0.010447	sdz-36
WBGene00018831	323.104	-0.532705	0.158626	-3.35823	0.000784424	0.0104498	F54E7.9
WBGene00009176	710.851	-0.418007	0.124487	-3.35784	0.000785545	0.0104548	nmat-2
WBGene00044294	1340.57	-0.302648	0.0901416	-3.35747	0.000786603	0.0104589	C01B10.11
WBGene00001394	76319.4	0.398597	0.118747	3.35668	0.000788836	0.0104787	fat-2
WBGene00009011	2611.05	-0.346738	0.103311	-3.35626	0.000790054	0.0104849	F21D5.6
WBGene00021985	3839.35	0.293158	0.087354	3.35598	0.000790851	0.0104855	Y59C2A.2
WBGene00012175	73.5593	0.596327	0.177726	3.35532	0.000792742	0.0105006	W01C9.1
WBGene00008857	1532.44	-0.313586	0.0934932	-3.35411	0.000796216	0.0105251	timm-23
WBGene00014022	1525.45	-0.375053	0.111825	-3.35391	0.00079678	0.0105251	ZK637.2
WBGene00016093	708.587	-0.337059	0.100498	-3.35389	0.000796844	0.0105251	srsx-34
WBGene00008051	375.761	0.380389	0.113446	3.35303	0.000799316	0.0105478	lron-4
WBGene00000226	39966.8	0.260709	0.0777702	3.3523	0.000801424	0.0105657	atl-1
WBGene00012188	360.275	-0.489988	0.146231	-3.35079	0.000805817	0.0106136	W01G7.4
WBGene00014057	102.891	0.580685	0.173423	3.34837	0.000812895	0.0106932	ZK673.1
WBGene00015298	407.045	-0.341241	0.101918	-3.3482	0.000813391	0.0106932	rml-4
WBGene00003167	89.2238	0.526101	0.157193	3.34685	0.00081735	0.0107254	mec-3
WBGene00013419	4714.54	0.346592	0.103558	3.34685	0.000817369	0.0107254	Y65A5A.2
WBGene00001620	1617.23	-0.460102	0.137506	-3.34606	0.000819687	0.0107457	glt-1
WBGene00003422	31876	0.232712	0.0695713	3.34495	0.00082298	0.0107788	msh-6
WBGene00009475	192.156	-0.493375	0.14757	-3.34333	0.000827803	0.0108273	F36F2.1
WBGene00020246	16557.1	0.296509	0.0886928	3.34311	0.000828462	0.0108273	clic-1
WBGene00020843	4877.58	0.241679	0.0722958	3.34293	0.000829001	0.0108273	T27A3.7
WBGene00020942	1786.38	-0.435351	0.130256	-3.34229	0.000830912	0.0108328	W02D7.6
WBGene00021832	6773.61	0.284663	0.0851706	3.34227	0.000830969	0.0108328	syp-5
WBGene00001057	9721.8	0.250411	0.0749794	3.33973	0.000838584	0.0109219	dpf-4
WBGene00021542	175.655	-0.595115	0.178247	-3.33871	0.00084167	0.0109519	Y43B11AL.1
WBGene00011727	172.562	0.485307	0.145382	3.33814	0.000843416	0.0109644	T12A7.6
WBGene00001919	96.8388	0.603206	0.180715	3.33788	0.000844206	0.0109645	his-45
WBGene00007375	18.4994	-0.664994	0.199282	-3.33694	0.000847048	0.0109768	C06C3.4
WBGene00007387	7503.05	0.391064	0.117198	3.33679	0.000847508	0.0109768	jmjd-5
WBGene00009510	53.0809	-0.660756	0.198005	-3.33707	0.000846663	0.0109768	F37D6.4
WBGene00007743	195.089	-0.579261	0.173661	-3.33558	0.00085121	0.0110146	C26C6.9
WBGene00021444	7186.85	0.286641	0.0859914	3.33337	0.000858011	0.0110924	ttc-7
WBGene00220140	11.6213	-0.598124	0.179449	-3.33311	0.000858817	0.0110925	Y34F4.7
WBGene00000421	44236.7	0.246829	0.0740811	3.33188	0.00086262	0.0111271	ced-7
WBGene00020992	417.817	0.43674	0.131085	3.33173	0.000863083	0.0111271	W03F8.2
WBGene00019959	1030.69	-0.307124	0.0921912	-3.33138	0.000864156	0.0111307	R08E3.3
WBGene00000202	7907.73	0.366868	0.110135	3.33106	0.000865159	0.0111334	exos-4.2
WBGene00022292	790.767	-0.368325	0.110601	-3.33021	0.000867802	0.0111571	Y75D11A.3
WBGene00003924	21195.5	0.26031	0.0781769	3.32976	0.000869211	0.011165	pas-3
WBGene00015171	926.882	-0.290073	0.087184	-3.32713	0.000877447	0.0112604	vang-1
WBGene00194674	2356.55	-0.566963	0.170439	-3.32649	0.000879485	0.0112762	F23D12.11
WBGene00002260	106.031	-0.648472	0.194984	-3.32577	0.000881761	0.0112951	lbp-8
WBGene00015191	517.152	-0.423199	0.127284	-3.32484	0.000884698	0.0113223	B0432.10
WBGene00003726	427.695	0.434128	0.130689	3.32184	0.000894268	0.0114344	nhr-136
WBGene00018103	61.5022	-0.620087	0.186739	-3.32061	0.000898211	0.0114639	F36H5.4
WBGene00018893	1865.31	-0.341971	0.102982	-3.32069	0.000897953	0.0114639	wdr-12
WBGene00004481	23331.1	0.345945	0.104196	3.32013	0.000899754	0.0114731	rps-12
WBGene00006430	3081.83	0.293632	0.0884817	3.31856	0.000904816	0.0115271	tag-51
WBGene00000080	4424.77	-0.280999	0.084714	-3.31703	0.000909812	0.0115769	adr-2
WBGene00001972	3021.57	-0.291492	0.0878822	-3.31685	0.000910379	0.0115769	hmg-1.2
WBGene00020781	22853.1	0.250194	0.0754762	3.31487	0.000916866	0.0116489	T24H7.2
WBGene00001155	14606.4	-0.314845	0.0949954	-3.31431	0.000918681	0.0116613	ech-6
WBGene00008918	9222.23	0.270092	0.081511	3.31356	0.000921153	0.0116734	pigt-1
WBGene00077441	41.7906	-0.652914	0.197045	-3.31352	0.000921296	0.0116734	C43D7.10
WBGene00006631	42.9857	-0.6271	0.189333	-3.31216	0.000925802	0.0117198	tsp-5
WBGene00000088	520.18	0.40304	0.121709	3.31151	0.00092795	0.0117364	aex-5
WBGene00005092	197.164	-0.537504	0.162427	-3.3092	0.000935633	0.0118173	srd-14
WBGene00016481	541.575	0.505853	0.152868	3.30908	0.000936029	0.0118173	C36C5.12
WBGene00011743	6820.84	0.35762	0.10814	3.307	0.000943001	0.0118946	T13F2.2
WBGene00013017	208.329	-0.439405	0.132883	-3.30671	0.00094399	0.0118963	Y48E1C.4
WBGene00015326	7430.97	0.361797	0.109447	3.30569	0.000947425	0.0119289	ivd-1
WBGene00016540	417.002	0.369925	0.111974	3.30368	0.00095426	0.0120003	C39F7.5
WBGene00017538	1225.08	-0.323825	0.0980244	-3.30351	0.000954809	0.0120003	ceh-49
WBGene00013015	449.532	-0.434772	0.131693	-3.30141	0.000961991	0.0120797	Y48E1C.2
WBGene00016965	1743.19	0.307333	0.093113	3.30065	0.000964625	0.0121019	C56C10.9
WBGene00017837	26920.3	0.270027	0.0818486	3.29911	0.000969929	0.0121575	F26G1.1
WBGene00016206	1717.84	0.419335	0.127194	3.29682	0.000977861	0.012246	C29E4.9
WBGene00002124	1974.65	-0.359877	0.109173	-3.29638	0.000979378	0.012254	inx-2
WBGene00018931	304.502	0.493737	0.149883	3.29415	0.00098721	0.012341	ugt-52
WBGene00003999	1276.55	-0.314162	0.0953976	-3.29319	0.000990586	0.0123722	pgp-5
WBGene00009783	3661.51	-0.35377	0.107452	-3.29234	0.000993581	0.0123985	rer-1
WBGene00004491	4170.97	-0.349986	0.10632	-3.29182	0.000995418	0.0124066	rps-22
WBGene00008968	11573.1	0.348518	0.105879	3.29165	0.000996001	0.0124066	elli-1
WBGene00018835	140.35	-0.563927	0.171602	-3.28624	0.00101535	0.0126364	F54F2.7
WBGene00004312	4347.62	-0.317622	0.096664	-3.28584	0.0010168	0.0126432	rba-1
WBGene00008431	2158.22	-0.388697	0.118325	-3.285	0.00101982	0.0126583	piga-1
WBGene00021233	588.626	0.6573	0.200076	3.28525	0.00101893	0.0126583	Y19D10B.4
WBGene00003514	7900.17	0.456026	0.138838	3.2846	0.00102128	0.0126651	myo-2
WBGene00011556	317.409	0.450886	0.137333	3.28317	0.00102647	0.0127183	vglu-3
WBGene00003090	16951.4	0.32541	0.0991863	3.2808	0.00103513	0.0127762	lys-1
WBGene00006606	2134.18	-0.296693	0.0904265	-3.28104	0.00103424	0.0127762	tra-3
WBGene00010918	628.297	-0.289724	0.0883198	-3.28039	0.00103662	0.0127762	M117.1
WBGene00018656	570.313	0.401441	0.122369	3.28058	0.00103593	0.0127762	txdc-12.2
WBGene00022165	235.876	0.514865	0.156897	3.28154	0.00103242	0.0127762	Y71H2AL.2
WBGene00197733	10.4064	0.584099	0.178041	3.2807	0.00103549	0.0127762	T25C12.5
WBGene00006646	242.984	-0.413953	0.12621	-3.27988	0.00103853	0.0127884	tsp-20
WBGene00009255	44.1912	0.659618	0.201329	3.27632	0.00105171	0.012928	ugt-34
WBGene00011350	16283.9	0.29088	0.088777	3.27652	0.00105094	0.012928	perm-1
WBGene00004752	17741	0.229596	0.070097	3.2754	0.00105511	0.012947	sec-5
WBGene00011834	4036.1	-0.303773	0.0927427	-3.27543	0.001055	0.012947	dvc-1
WBGene00006924	51439	-0.235042	0.0717827	-3.27435	0.00105904	0.0129839	vig-1
WBGene00008113	1163.43	-0.37448	0.114384	-3.27387	0.00106084	0.0129946	C46C2.5
WBGene00017422	61.4521	-0.6026	0.1841	-3.27321	0.00106333	0.0130137	F13C5.1
WBGene00000257	8437.32	0.220462	0.0673825	3.2718	0.00106867	0.0130168	bmk-1
WBGene00000722	51.4252	-0.647886	0.198024	-3.27176	0.00106882	0.0130168	col-149
WBGene00001444	7463.67	0.585393	0.178928	3.27166	0.00106916	0.0130168	flp-1
WBGene00007593	2229.44	0.251486	0.0768637	3.27184	0.0010685	0.0130168	C14H10.3
WBGene00010476	2730.9	0.294426	0.0899639	3.27271	0.0010652	0.0130168	rnf-113
WBGene00014253	1939.43	-0.339778	0.103854	-3.27168	0.0010691	0.0130168	ZK1320.3
WBGene00020709	12895.7	0.263132	0.0804419	3.27109	0.00107135	0.0130321	T23B3.1
WBGene00013122	1644.94	-0.346526	0.106088	-3.2664	0.00108926	0.0132365	impt-1
WBGene00013169	71.1364	0.633435	0.193937	3.26619	0.00109004	0.0132365	Y53F4B.23
WBGene00007702	168.549	-0.586747	0.179695	-3.26523	0.00109375	0.013262	C24H11.5
WBGene00012592	31.1086	-0.649226	0.198864	-3.26467	0.00109594	0.013262	Y38E10A.14
WBGene00017044	636.66	-0.476758	0.146034	-3.2647	0.00109578	0.013262	mrpl-18
WBGene00023409	1460.08	-0.31435	0.0962844	-3.26481	0.00109539	0.013262	mbd-2
WBGene00007392	592.953	0.487205	0.149258	3.26419	0.00109777	0.0132728	fbxa-156
WBGene00022696	214.686	0.458542	0.140538	3.26277	0.00110329	0.0133281	ift-139
WBGene00021159	668.095	-0.318395	0.0976158	-3.26172	0.0011074	0.0133661	slc-46A
WBGene00018217	629.843	-0.324776	0.0996574	-3.25892	0.00111836	0.0134867	F40A3.2
WBGene00012997	619.631	-0.364494	0.111906	-3.25713	0.00112544	0.0135605	Y48C3A.18
WBGene00020096	1937.44	-0.31727	0.0974286	-3.25643	0.00112821	0.0135822	R144.6
WBGene00002135	1114.41	-0.281341	0.0864178	-3.25559	0.00113158	0.0135994	inx-13
WBGene00044648	952.214	-0.401029	0.123181	-3.25561	0.00113147	0.0135994	R144.13
WBGene00044762	701.355	-0.428209	0.131556	-3.25497	0.00113405	0.0136174	ZK688.11
WBGene00022042	23442.9	0.350071	0.107575	3.25421	0.00113707	0.0136419	icd-2
WBGene00008920	184613	0.43233	0.132886	3.2534	0.00114034	0.0136694	eef-1G
WBGene00007393	32.7573	0.651589	0.200359	3.2521	0.00114555	0.0136936	fbxa-157
WBGene00007705	3840.2	-0.315935	0.0971627	-3.25161	0.00114754	0.0136936	C25A1.1
WBGene00008430	15129.6	0.23559	0.0724471	3.2519	0.00114638	0.0136936	hgap-2
WBGene00017504	268.727	0.436948	0.134363	3.25201	0.00114593	0.0136936	F16B4.2
WBGene00018595	646.596	-0.357077	0.109837	-3.25097	0.00115012	0.0136936	fbxa-145
WBGene00018898	21870.2	0.422005	0.129744	3.25261	0.00114352	0.0136936	F55F10.1
WBGene00019317	84.2556	-0.606683	0.186617	-3.25096	0.00115018	0.0136936	K02E10.1
WBGene00022059	7745.17	0.281123	0.0864719	3.25103	0.00114986	0.0136936	Y67D8A.2
WBGene00000156	27107.9	0.211168	0.0649956	3.24896	0.00115828	0.0137657	44652
WBGene00001332	7330.85	0.246082	0.0757592	3.24822	0.0011613	0.0137657	eri-1
WBGene00007317	79.3399	-0.552375	0.170086	-3.24763	0.0011637	0.0137657	C05A9.2
WBGene00012546	2060.86	-0.342493	0.10545	-3.24792	0.00116254	0.0137657	Y37D8A.4
WBGene00013151	1193.95	0.305411	0.0940385	3.24772	0.00116332	0.0137657	nsun-5
WBGene00014308	344.57	-0.446774	0.137547	-3.24815	0.00116158	0.0137657	F07H5.4
WBGene00016234	2686.22	0.444386	0.136838	3.24753	0.0011641	0.0137657	C29G2.6
WBGene00019166	477.284	0.380077	0.116998	3.24859	0.00115978	0.0137657	tat-2
WBGene00002065	5356.29	-0.318847	0.0982408	-3.24557	0.00117218	0.0138481	iff-2
WBGene00013739	4702.94	0.286182	0.0881821	3.24535	0.00117304	0.0138481	spin-4
WBGene00016195	3733	-0.285118	0.0878626	-3.24505	0.00117432	0.0138514	erd-2.2
WBGene00007435	5243.62	-0.271744	0.0837522	-3.24462	0.00117606	0.0138602	algn-6
WBGene00001909	1876.17	0.396368	0.122183	3.24404	0.00117848	0.0138771	his-35
WBGene00004030	367.769	0.477486	0.147263	3.24241	0.00118523	0.0139331	pin-2
WBGene00006490	28527.7	0.264212	0.0814835	3.24253	0.00118475	0.0139331	kdin-1
WBGene00016400	3082.81	-0.266652	0.0822639	-3.24142	0.00118936	0.013965	C34D4.4
WBGene00019232	584.543	0.396825	0.122428	3.24128	0.00118993	0.013965	ugt-13
WBGene00000797	1009.34	-0.347621	0.107261	-3.24088	0.00119162	0.013973	crn-4
WBGene00001094	57755.7	0.365935	0.112966	3.23933	0.00119812	0.0140316	dars-1
WBGene00014058	3356.51	-0.297853	0.0919527	-3.2392	0.00119867	0.0140316	ZK673.2
WBGene00017429	97.9484	0.544203	0.168017	3.23897	0.00119961	0.0140316	F13D11.4
WBGene00002299	2432.1	0.261494	0.0807442	3.23854	0.00120141	0.0140409	let-23
WBGene00007191	102.149	0.511717	0.158131	3.23604	0.00121201	0.0141471	lgc-20
WBGene00020498	13648.9	0.213929	0.0661108	3.23592	0.00121252	0.0141471	T14B4.1
WBGene00012005	321.566	-0.420748	0.130042	-3.23548	0.00121439	0.0141571	44713
WBGene00012813	933.057	-0.38422	0.118815	-3.23376	0.00122171	0.0142305	Y43F8B.2
WBGene00015807	2111.19	-0.320073	0.0990018	-3.233	0.00122497	0.0142567	C16A3.2
WBGene00017797	17294.8	0.308098	0.095321	3.23222	0.00122834	0.0142841	symk-1
WBGene00022138	6284.13	0.211246	0.0653935	3.23038	0.00123627	0.0143644	trpp-10
WBGene00018781	1925.84	0.264247	0.0818169	3.22974	0.00123904	0.0143727	F54A3.2
WBGene00021342	2207.09	0.333586	0.103281	3.22989	0.00123839	0.0143727	Y35H6.3
WBGene00018948	7244.92	-0.329759	0.102125	-3.22899	0.00124229	0.0143984	F56C9.3
WBGene00014258	3404.63	-0.312924	0.0970145	-3.22554	0.00125735	0.014561	ZK1320.9
WBGene00009260	252.648	-0.400525	0.1242	-3.22484	0.00126041	0.0145843	calm-1
WBGene00007799	444.911	0.336408	0.104328	3.22452	0.00126183	0.0145886	nrx-1
WBGene00044650	4937.51	-0.260093	0.0806776	-3.22385	0.00126478	0.0146107	Y71G10AR.4
WBGene00019153	1073.33	-0.333773	0.103548	-3.22337	0.00126691	0.0146233	H04M03.3
WBGene00007050	14984.9	0.298525	0.0926324	3.22269	0.00126993	0.0146461	utp-20
WBGene00003920	43517.3	0.269733	0.083728	3.22154	0.00127505	0.0146929	par-5
WBGene00020256	593.694	-0.407242	0.126489	-3.21959	0.00128372	0.0147807	T05C3.6
WBGene00022836	2504.4	-0.29893	0.0928617	-3.21908	0.00128602	0.014795	ZK973.11
WBGene00008356	485.042	-0.504482	0.156735	-3.21869	0.00128776	0.0148029	nspc-20
WBGene00020156	92.6405	-0.579047	0.179959	-3.21766	0.00129241	0.0148441	T02B11.4
WBGene00012449	205.383	0.579938	0.180462	3.21362	0.00131071	0.015034	nhr-231
WBGene00019956	196.841	-0.564918	0.175793	-3.21354	0.00131109	0.015034	fbxb-75
WBGene00017686	61573.6	0.234601	0.0730244	3.21263	0.00131525	0.0150609	tpp-2
WBGene00018568	199.825	-0.501291	0.156041	-3.21256	0.00131559	0.0150609	F47E1.4
WBGene00003630	3910.45	0.426906	0.132951	3.211	0.00132275	0.0151059	nhr-40
WBGene00004482	992.196	-0.459626	0.143137	-3.21109	0.00132232	0.0151059	rps-13
WBGene00011738	8459.53	0.323453	0.100722	3.21135	0.00132115	0.0151059	T12G3.2
WBGene00044344	1869.19	-0.28685	0.0893682	-3.20975	0.0013285	0.0151592	mrpl-39
WBGene00016097	695.705	0.375131	0.116895	3.20912	0.00133142	0.0151802	C25E10.8
WBGene00014294	1129.13	-0.357298	0.111363	-3.20842	0.00133465	0.0152046	C53C7.5
WBGene00219838	406.48	-0.434166	0.135353	-3.20765	0.00133822	0.0152329	C28H8.14
WBGene00017992	7563.41	0.341727	0.106562	3.20684	0.00134202	0.0152638	F32E10.5
WBGene00018270	2317.91	-0.398735	0.124407	-3.20509	0.0013502	0.0153442	eas-1
WBGene00012615	6169.86	-0.318095	0.0993001	-3.20337	0.00135828	0.0154236	dct-16
WBGene00011510	14092.8	-0.22437	0.0700575	-3.20265	0.00136168	0.0154497	pdha-1
WBGene00009544	339.917	0.396407	0.123788	3.20231	0.00136331	0.0154556	F38E11.9
WBGene00016073	6273.57	0.361883	0.113037	3.20146	0.00136734	0.0154888	C24H12.4
WBGene00010512	62.9574	-0.630348	0.197013	-3.19952	0.00137655	0.0155786	K02E11.3
WBGene00017755	79.8484	-0.586514	0.183324	-3.19933	0.00137749	0.0155786	zip-8
WBGene00001584	19879	0.244057	0.0763012	3.19859	0.001381	0.0156056	nrde-4
WBGene00044792	43.183	-0.617753	0.193209	-3.19734	0.00138703	0.0156611	F59C6.14
WBGene00007201	1433.83	-0.337967	0.10573	-3.19651	0.00139103	0.0156767	exos-4.1
WBGene00019680	553.528	-0.503368	0.157463	-3.19674	0.00138992	0.0156767	K12H4.5
WBGene00022769	1336.94	-0.292426	0.0914873	-3.19635	0.00139177	0.0156767	sorf-1
WBGene00009388	1575.11	0.371727	0.116345	3.19504	0.00139813	0.0157357	F35B12.9
WBGene00019878	897.816	0.347344	0.108726	3.19467	0.00139992	0.0157432	R05D3.3
WBGene00000204	1766.13	-0.398881	0.124878	-3.19417	0.00140232	0.0157576	arx-6
WBGene00023491	223.625	-0.465093	0.145721	-3.19168	0.0014145	0.0158816	tsp-21
WBGene00007531	70.4105	-0.556162	0.174312	-3.19062	0.00141966	0.0158895	C11H1.7
WBGene00008602	629.497	0.518081	0.162371	3.19073	0.00141914	0.0158895	oac-14
WBGene00010503	743.377	0.357111	0.111911	3.19101	0.00141775	0.0158895	K02C4.5
WBGene00045175	552.063	-0.601982	0.188673	-3.19061	0.00141974	0.0158895	C10C6.9
WBGene00008476	519.936	-0.330017	0.103584	-3.18599	0.00144261	0.0161325	E03H4.8
WBGene00020912	58.5278	0.570497	0.179135	3.18472	0.00144892	0.0161902	W01A11.7
WBGene00012128	12077	0.304641	0.0956962	3.18342	0.00145547	0.0162504	nra-1
WBGene00020617	178.007	0.492362	0.154719	3.1823	0.00146108	0.0163001	T20D4.11
WBGene00003391	1699.85	0.411021	0.12917	3.18201	0.00146257	0.0163037	mog-3
WBGene00044107	751.549	-0.425938	0.133893	-3.18118	0.00146676	0.0163374	F58G6.9
WBGene00010453	627.671	0.410167	0.129001	3.17957	0.00147496	0.0164157	fozi-1
WBGene00006791	4509.49	-0.280192	0.0881828	-3.1774	0.00148601	0.0165255	unc-57
WBGene00001978	19612.8	0.203701	0.0641231	3.17671	0.00148954	0.0165516	hmp-1
WBGene00007122	7076.18	0.377427	0.118902	3.17428	0.00150211	0.0166781	B0250.5
WBGene00017924	402.589	-0.450116	0.141812	-3.17403	0.0015034	0.0166792	mrps-21
WBGene00194707	2906.38	0.332623	0.104823	3.17317	0.00150784	0.0167152	C53A5.17
WBGene00003246	6030.93	0.28789	0.0907328	3.17294	0.00150904	0.0167153	mig-14
WBGene00017742	3272.87	0.320909	0.101252	3.1694	0.00152755	0.0169069	nfyc-1
WBGene00016836	5081.52	0.343791	0.108489	3.1689	0.00153018	0.0169227	C50F2.2
WBGene00015547	4208.34	0.342227	0.108019	3.1682	0.00153384	0.0169497	ain-1
WBGene00004316	280.048	0.422799	0.133472	3.16771	0.00153646	0.0169653	rbf-1
WBGene00019124	22770.8	0.267001	0.084297	3.16739	0.00153816	0.0169706	F59E12.9
WBGene00021058	5936.31	0.262389	0.082852	3.16696	0.00154041	0.0169821	vps-18
WBGene00013917	2189.63	0.257078	0.0811855	3.16655	0.00154261	0.016993	cdk-11.2
WBGene00044067	2816.99	-0.25664	0.0810727	-3.16555	0.00154788	0.0170376	zipt-7.1
WBGene00007343	61.8936	0.591473	0.186863	3.16527	0.0015494	0.0170409	C05E7.1
WBGene00001479	3298.12	0.311465	0.0984592	3.16339	0.00155941	0.0170912	fmo-4
WBGene00003161	3882.02	-0.276412	0.0873809	-3.1633	0.00155992	0.0170912	mdf-2
WBGene00011713	2137.86	-0.246376	0.0778823	-3.16344	0.00155917	0.0170912	htrl-1
WBGene00014016	3068.38	-0.346973	0.109688	-3.16327	0.00156007	0.0170912	ZK632.9
WBGene00016202	14198.9	0.261454	0.0826467	3.16351	0.00155877	0.0170912	kle-2
WBGene00007019	411.575	-0.432044	0.136611	-3.16259	0.00156371	0.0170918	mdt-19
WBGene00011860	14245.4	0.403519	0.127579	3.1629	0.00156205	0.0170918	pigc-1
WBGene00022702	4909.58	-0.286475	0.0905826	-3.16258	0.00156378	0.0170918	cutc-1
WBGene00017485	38.2242	-0.635138	0.201006	-3.1598	0.00157879	0.0172423	F15E6.4
WBGene00005718	292.591	0.39396	0.124732	3.15846	0.00158603	0.0173079	srv-7
WBGene00006539	517.29	-0.389377	0.123301	-3.15794	0.00158886	0.0173253	tbb-6
WBGene00016277	12026	0.217401	0.0688534	3.15744	0.00159159	0.0173415	C30G12.6
WBGene00020037	448.099	-0.424627	0.134523	-3.15654	0.00159655	0.0173803	mrps-6
WBGene00020701	1576.6	0.329418	0.104367	3.15634	0.00159763	0.0173803	T22F7.1
WBGene00001578	1672.94	0.323659	0.102571	3.15548	0.00160236	0.0174046	ges-1
WBGene00015956	2971.43	0.434877	0.137813	3.15555	0.00160198	0.0174046	C18B2.5
WBGene00020089	439.748	-0.424278	0.134576	-3.1527	0.00161767	0.0175574	R119.3
WBGene00016741	25675.3	0.289507	0.0918438	3.15216	0.00162065	0.017576	C48B6.3
WBGene00019952	87.3637	-0.587706	0.186459	-3.15193	0.00162194	0.0175764	fbxb-74
WBGene00001437	72.6608	-0.589041	0.186899	-3.15165	0.00162354	0.0175801	fkh-5
WBGene00021545	19517.4	0.320234	0.101654	3.15023	0.00163141	0.0176518	Y43H11AL.1
WBGene00001743	4411.58	-0.33489	0.10632	-3.14983	0.00163364	0.0176622	grp-1
WBGene00013455	49.156	0.598559	0.190058	3.14935	0.00163632	0.0176775	ssu-2
WBGene00021222	20.8034	0.603502	0.191746	3.14739	0.00164733	0.0177828	irld-53
WBGene00000382	16798.9	0.223615	0.07106	3.14684	0.00165043	0.0178026	cdc-6
WBGene00012337	15865	0.20188	0.0641773	3.14566	0.00165715	0.0178464	scyl-1
WBGene00018314	39.3142	0.631204	0.200672	3.14545	0.00165832	0.0178464	F41H10.1
WBGene00019130	6102.44	0.291597	0.092694	3.1458	0.00165633	0.0178464	gbas-1
WBGene00009064	6591.32	0.317306	0.100916	3.14426	0.00166505	0.017905	F22G12.4
WBGene00018240	183.538	-0.556491	0.177069	-3.14279	0.00167346	0.0179817	cox-17
WBGene00185076	159.409	0.566803	0.180375	3.14236	0.00167594	0.0179945	Y7A9A.79
WBGene00007712	464.753	-0.443254	0.141191	-3.13938	0.00169303	0.0181618	mrpl-34
WBGene00012795	1386.37	-0.303431	0.0966657	-3.13897	0.00169542	0.0181618	Y43E12A.3
WBGene00016652	4706.09	-0.246053	0.0783845	-3.13905	0.00169495	0.0181618	got-2.1
WBGene00005663	13871.7	0.239022	0.0761815	3.13753	0.00170378	0.0182375	sars-1
WBGene00003986	1864.37	-0.286202	0.0912712	-3.13573	0.00171429	0.018336	mct-4
WBGene00014203	956.707	-0.3782	0.120628	-3.13525	0.00171705	0.0183514	ZK1058.3
WBGene00019353	5238.83	0.309531	0.098784	3.13341	0.00172786	0.0184529	K03B4.1
WBGene00015055	292.335	-0.35943	0.114744	-3.13245	0.00173352	0.0184992	pitr-3
WBGene00015096	139.455	-0.498571	0.159183	-3.13205	0.00173589	0.0185104	B0261.8
WBGene00021607	1492.21	0.430037	0.137346	3.13104	0.00174188	0.0185602	Y46H3C.7
WBGene00000101	68021.4	0.233563	0.0746033	3.13074	0.00174368	0.0185652	aka-1
WBGene00011517	75.2068	0.569936	0.182148	3.12897	0.00175421	0.0186632	cgt-1
WBGene00009582	694.205	-0.333864	0.106712	-3.12864	0.0017562	0.0186701	slcr-46.3
WBGene00019304	547.136	0.323315	0.103348	3.1284	0.0017576	0.0186708	K02D10.4
WBGene00000007	311.836	-0.38017	0.121544	-3.12785	0.00176093	0.0186832	aat-6
WBGene00008611	52.1121	-0.596902	0.190867	-3.12732	0.0017641	0.0186832	fbxb-68
WBGene00010953	2194.41	0.369253	0.118068	3.12746	0.00176324	0.0186832	clec-190
WBGene00235385	1172.7	0.468675	0.14985	3.12763	0.00176223	0.0186832	Y48G1A.7
WBGene00022469	45.9928	0.602205	0.192593	3.12682	0.00176705	0.0187003	Y119C1B.3
WBGene00001091	2118.02	0.332369	0.106313	3.12633	0.00177001	0.0187174	drh-2
WBGene00006519	728.284	-0.403751	0.129191	-3.12523	0.00177663	0.0187733	cox-6A
WBGene00019294	560.995	0.301309	0.0964218	3.12491	0.00177862	0.0187801	K02A6.3
WBGene00016890	165.714	0.531741	0.170212	3.124	0.00178413	0.0188241	lst-5
WBGene00009245	12122.8	0.286286	0.091662	3.12328	0.00178847	0.0188415	rict-1
WBGene00015694	23.5335	0.62901	0.201393	3.12329	0.00178841	0.0188415	ugt-27
WBGene00002133	1236.02	-0.277158	0.0887703	-3.12219	0.0017951	0.0188971	inx-11
WBGene00010785	39552.5	0.314059	0.100603	3.12176	0.00179772	0.0189105	top-2
WBGene00008196	1946.66	-0.300203	0.0961978	-3.12068	0.00180432	0.0189657	C49C3.6
WBGene00009478	2486.41	-0.23277	0.0745955	-3.12043	0.00180588	0.0189673	syx-7
WBGene00022051	1751.27	0.344432	0.110387	3.12022	0.00180719	0.0189673	rep-1
WBGene00000517	4125.18	-0.240248	0.077016	-3.11945	0.00181188	0.0189882	cki-2
WBGene00012514	171.983	-0.514323	0.164872	-3.11953	0.00181142	0.0189882	Y26E6A.3
WBGene00013002	3235.07	0.206923	0.0663538	3.11848	0.00181789	0.0190369	Y48E1B.3
WBGene00000803	3376.71	0.310008	0.0994174	3.11825	0.00181931	0.0190375	csb-1
WBGene00017343	210.01	-0.475542	0.152534	-3.11763	0.00182315	0.0190634	F10E7.1
WBGene00019723	5705.94	0.340548	0.109247	3.11723	0.00182556	0.0190744	fbxc-47
WBGene00017594	291.033	0.434398	0.139426	3.11561	0.00183562	0.0191652	F19C7.4
WBGene00014097	29305.9	0.324308	0.104117	3.11484	0.00184044	0.0192012	ZK829.9
WBGene00010304	743.66	-0.323135	0.103812	-3.11271	0.0018538	0.0192687	clpf-1
WBGene00013365	351.294	-0.437239	0.140433	-3.11352	0.00184872	0.0192687	Y60A3A.19
WBGene00019836	5970.03	0.277771	0.0892342	3.11283	0.00185306	0.0192687	R02F2.7
WBGene00219217	202.263	-0.504368	0.162034	-3.11273	0.00185363	0.0192687	C08F8.15
WBGene00220225	666.665	0.460673	0.147991	3.11284	0.00185296	0.0192687	Y105E8A.50
WBGene00021811	1600.32	-0.334457	0.107522	-3.11059	0.00186716	0.0193789	ral-1
WBGene00219593	28.5352	0.617581	0.198532	3.11074	0.00186617	0.0193789	anr-15
WBGene00009164	29984	0.294532	0.0947107	3.1098	0.00187213	0.0194068	hrdl-1
WBGene00013132	4090.9	0.226006	0.0726773	3.10972	0.00187263	0.0194068	strd-1
WBGene00000804	1840.25	0.352095	0.113276	3.1083	0.00188166	0.0194861	csc-1
WBGene00013485	32.095	0.623156	0.200606	3.10637	0.001894	0.0195993	Y69H2.10
WBGene00013587	374.49	-0.370866	0.119414	-3.10571	0.00189824	0.0196142	hrg-10
WBGene00016494	4117.16	0.283682	0.0913373	3.10588	0.00189716	0.0196142	C37A2.8
WBGene00003074	6429.83	0.224945	0.0724473	3.10494	0.00190315	0.019636	lars-2
WBGene00021237	852.234	0.362442	0.116723	3.10515	0.00190182	0.019636	crtc-1
WBGene00009405	145.206	0.453319	0.146013	3.10465	0.00190503	0.0196409	F35C11.6
WBGene00009932	151.356	-0.503444	0.162187	-3.10409	0.00190864	0.0196637	#N/A
WBGene00021863	1867.85	0.272764	0.0879011	3.10308	0.00191517	0.0197164	Y54F10BM.9
WBGene00009486	10.7743	0.515421	0.166152	3.10211	0.00192149	0.0197525	F36G9.7
WBGene00020808	5960.3	-0.304782	0.0982473	-3.10219	0.00192091	0.0197525	clik-1
WBGene00022677	1943.45	-0.346071	0.111669	-3.09907	0.00194126	0.019941	rfth-1
WBGene00016169	7226.15	0.29368	0.0947922	3.09815	0.00194734	0.0199888	C27F2.7
WBGene00015938	36574.9	0.324676	0.104818	3.09752	0.0019515	0.0200168	anat-1
WBGene00011499	114.607	-0.527717	0.170456	-3.09591	0.0019621	0.0200725	T05G5.4
WBGene00013765	835.277	-0.317718	0.102628	-3.09582	0.00196267	0.0200725	cdkr-3
WBGene00015579	395.621	-0.523654	0.169129	-3.09617	0.00196035	0.0200725	C07H6.2
WBGene00022310	6623.71	0.310864	0.100398	3.09633	0.00195931	0.0200725	Y77E11A.7
WBGene00001755	2752.89	-0.361429	0.11688	-3.09232	0.00198597	0.020237	gst-7
WBGene00001874	27508.5	0.253504	0.0819694	3.09266	0.00198369	0.020237	him-17
WBGene00006391	489.259	-0.418649	0.135381	-3.09238	0.00198558	0.020237	taf-9
WBGene00013366	398.477	-0.355437	0.114913	-3.0931	0.00198081	0.020237	Y60A3A.21
WBGene00015391	7734.09	0.399599	0.129218	3.09245	0.00198515	0.020237	sdha-1
WBGene00006530	825.39	-0.310833	0.100541	-3.09162	0.00199067	0.0202668	tba-4
WBGene00020181	3398.56	-0.333428	0.107855	-3.09145	0.00199179	0.0202668	T02H6.11
WBGene00010007	5701.35	0.279071	0.0903027	3.0904	0.00199887	0.0203107	F53H4.2
WBGene00014176	935.102	-0.405291	0.131146	-3.09038	0.00199901	0.0203107	ZK1010.2
WBGene00004932	246.703	0.483715	0.15665	3.08787	0.00201599	0.0204638	sod-3
WBGene00018437	306.076	-0.480858	0.155733	-3.08772	0.002017	0.0204638	btb-8
WBGene00016811	2681.21	0.235404	0.0762543	3.08709	0.00202125	0.0204814	luc-7L3
WBGene00018249	3937.71	0.259143	0.0839456	3.08703	0.00202166	0.0204814	F40H3.1
WBGene00021925	1064.47	0.377723	0.122369	3.08676	0.00202353	0.0204855	immp-2
WBGene00013544	1921.46	0.303899	0.0984949	3.08542	0.00203262	0.0205627	Y75B8A.7
WBGene00003182	626.715	0.390923	0.126774	3.08362	0.00204497	0.0206727	mef-2
WBGene00003654	417.894	0.430094	0.139515	3.08277	0.00205082	0.0207168	nhr-64
WBGene00002980	56160.2	0.399936	0.129769	3.08192	0.00205673	0.0207466	lgg-1
WBGene00010420	1524.33	-0.323232	0.104875	-3.08206	0.00205575	0.0207466	mcrs-1
WBGene00002199	436.348	-0.443504	0.144108	-3.07757	0.00208694	0.0209909	kin-15
WBGene00004273	11648.4	0.304765	0.0990266	3.07761	0.00208666	0.0209909	rab-10
WBGene00012149	623.592	-0.337235	0.109558	-3.07815	0.00208289	0.0209909	VF13D12L.3
WBGene00015450	783.298	-0.336328	0.109279	-3.07769	0.00208612	0.0209909	C04F5.8
WBGene00007685	2022.25	0.270671	0.0879711	3.07682	0.00209224	0.0210291	C18E9.5
WBGene00004274	81316.6	0.276893	0.0900175	3.07599	0.00209805	0.0210723	rab-11.1
WBGene00018894	559.998	-0.412987	0.13443	-3.07213	0.00212537	0.0213314	mff-2
WBGene00001992	15.4955	-0.574604	0.18706	-3.07177	0.00212792	0.021339	hot-7
WBGene00010615	2399.55	-0.256524	0.0835148	-3.0716	0.00212917	0.021339	ate-1
WBGene00012806	4867.87	0.33981	0.110645	3.07117	0.00213224	0.0213392	dph-7
WBGene00020528	91.6476	0.502593	0.163644	3.07126	0.00213157	0.0213392	lgc-54
WBGene00009361	100.418	-0.513468	0.167221	-3.0706	0.0021363	0.0213646	F33E2.5
WBGene00008317	2740.38	0.263547	0.0858656	3.0693	0.00214561	0.021427	C54G4.7
WBGene00018474	5497.8	-0.266979	0.0869834	-3.06931	0.00214551	0.021427	cnep-1
WBGene00005552	1788.86	-0.306494	0.0999258	-3.06722	0.00216061	0.0215615	sri-40
WBGene00003085	35562	0.31464	0.102614	3.06626	0.00216758	0.0216002	ccar-1
WBGene00019239	145.458	-0.501961	0.163702	-3.06631	0.00216717	0.0216002	H24K24.2
WBGene00006932	4984.55	-0.215059	0.0701762	-3.06456	0.00217992	0.0217077	vps-34
WBGene00001910	111.127	-0.52407	0.171023	-3.06432	0.00218166	0.0217097	C50F4.6
WBGene00014081	783.601	0.376749	0.122957	3.06408	0.00218341	0.0217116	ipmk-1
WBGene00007316	348.083	0.522643	0.1706	3.06356	0.0021872	0.0217175	nlp-41
WBGene00009884	165.197	0.452562	0.147734	3.06336	0.00218865	0.0217175	F49C12.15
WBGene00015766	1169.26	-0.362909	0.118461	-3.06353	0.0021874	0.0217175	C14C11.2
WBGene00004404	1401.7	-0.306053	0.0999336	-3.06256	0.00219449	0.0217599	rom-5
WBGene00016638	50909.7	0.286824	0.0936995	3.0611	0.00220526	0.0218513	perm-4
WBGene00004342	752.966	0.281503	0.0919809	3.06045	0.00221002	0.0218829	rfs-1
WBGene00220076	178.422	0.450611	0.147289	3.05937	0.00221804	0.0219468	T21B4.21
WBGene00015481	29116.8	0.263273	0.0861273	3.05678	0.00223725	0.0221213	C05D11.1
WBGene00010435	6210.41	0.200506	0.0656034	3.05633	0.00224063	0.022139	JC8.2
WBGene00000857	380.885	-0.387805	0.126923	-3.05543	0.0022474	0.0221435	cwn-1
WBGene00007140	357.547	0.418515	0.13697	3.05553	0.00224663	0.0221435	cyp-29A4
WBGene00017053	4921.11	0.308461	0.100952	3.05551	0.00224675	0.0221435	D2024.5
WBGene00019518	102.487	0.535483	0.175223	3.05602	0.002243	0.0221435	K08B5.1
WBGene00022250	1466.85	-0.393576	0.12884	-3.05477	0.00225233	0.0221764	Y73B6BL.29
WBGene00001046	1961.48	0.266733	0.0873551	3.05343	0.0022624	0.0222599	dnj-28
WBGene00008429	22608.8	0.248801	0.081491	3.05312	0.00226479	0.0222678	etc-1
WBGene00003590	916.647	-0.328032	0.107468	-3.05237	0.00227039	0.0222765	nex-3
WBGene00019094	115.521	0.520563	0.170544	3.05237	0.00227044	0.0222765	F59A7.7
WBGene00020625	196.895	-0.43818	0.143546	-3.05254	0.00226916	0.0222765	mrrf-1
WBGene00006580	539.132	0.361225	0.118355	3.05203	0.00227297	0.0222856	tlp-1
WBGene00007312	486.738	-0.366678	0.120212	-3.05026	0.00228646	0.0223865	C04H5.1
WBGene00013735	1248.84	-0.345318	0.113208	-3.0503	0.00228615	0.0223865	Y111B2A.12
WBGene00005713	36.0619	0.600034	0.196826	3.04855	0.00229952	0.0224987	srv-2
WBGene00001150	159.681	0.470131	0.154231	3.04823	0.00230192	0.0225063	ech-1.1
WBGene00008111	199.878	0.426565	0.139957	3.04784	0.00230493	0.0225063	C46C2.3
WBGene00012033	24790.2	0.343514	0.112708	3.04781	0.00230512	0.0225063	T26C5.3
WBGene00022704	3065.59	-0.351215	0.115318	-3.04562	0.00232202	0.0226555	ZK353.9
WBGene00021412	208.946	0.518152	0.170188	3.04459	0.00233001	0.0227176	cyp-29A3
WBGene00045251	10.3702	-0.529253	0.173923	-3.04304	0.002342	0.0228186	F54F7.9
WBGene00016307	146.656	-0.451829	0.148587	-3.04083	0.00235931	0.0229713	fbxc-18
WBGene00000095	1241.43	-0.249075	0.0819199	-3.04047	0.00236213	0.0229822	aha-1
WBGene00010750	253.294	0.440696	0.144958	3.04016	0.00236451	0.0229822	K10D11.6
WBGene00016957	3147.43	-0.328158	0.107945	-3.04005	0.00236535	0.0229822	atic-1
WBGene00004276	2079.35	-0.246774	0.081189	-3.0395	0.00236975	0.0230089	rab-14
WBGene00004783	3527.52	0.25169	0.0828277	3.03871	0.0023759	0.0230527	seu-1
WBGene00012845	9023.7	0.244656	0.0805353	3.03787	0.00238255	0.0230975	set-24
WBGene00015336	79.597	-0.549544	0.180907	-3.03771	0.00238383	0.0230975	C02D5.2
WBGene00021132	4058.84	0.356138	0.11725	3.03743	0.00238602	0.0231028	nfyb-1
WBGene00011062	964.381	-0.334227	0.110076	-3.03631	0.0023949	0.0231248	R06C7.2
WBGene00015080	23.3881	-0.595516	0.196124	-3.03642	0.00239403	0.0231248	B0244.5
WBGene00015936	35.3176	-0.60581	0.199519	-3.03635	0.00239462	0.0231248	C17H12.11
WBGene00017080	802.443	-0.351797	0.115847	-3.03673	0.0023916	0.0231248	lec-12
WBGene00011737	5230.02	0.276661	0.091124	3.03609	0.00239665	0.0231258	sqst-1
WBGene00001709	636.777	0.290099	0.0955591	3.0358	0.00239896	0.0231321	grk-2
WBGene00018778	12803.7	0.258823	0.0852629	3.03559	0.00240067	0.0231327	F53H1.4
WBGene00016667	2045.85	0.572918	0.188768	3.03504	0.00240504	0.0231588	cpg-18
WBGene00022139	2221.59	0.346966	0.114337	3.0346	0.00240855	0.0231768	tub-2
WBGene00011648	603.378	-0.312267	0.10292	-3.03406	0.00241283	0.0231966	cni-1
WBGene00011742	5191.37	0.27702	0.0913074	3.03393	0.00241394	0.0231966	tgn-38
WBGene00000122	3389.46	-0.308921	0.101854	-3.03299	0.00242142	0.0232422	aly-3
WBGene00020269	17243.3	-0.281034	0.0926611	-3.03292	0.002422	0.0232422	erfa-1
WBGene00001456	337.449	0.419503	0.138438	3.03026	0.00244347	0.0234322	flp-13
WBGene00018181	1760.01	-0.358493	0.11834	-3.02936	0.00245075	0.0234859	mpdu-1
WBGene00004427	6541.4	-0.337972	0.111579	-3.02899	0.00245375	0.0234986	rpl-15
WBGene00019645	281.061	-0.395138	0.130487	-3.02818	0.00246032	0.0235455	swt-7
WBGene00000906	259.373	0.410343	0.135589	3.02637	0.00247512	0.0236547	daf-10
WBGene00009246	5369.61	0.257143	0.0849653	3.02644	0.0024745	0.0236547	gfm-1
WBGene00000120	143.148	-0.503607	0.16649	-3.02485	0.00248753	0.0237086	aly-1
WBGene00008426	436.786	-0.363196	0.120053	-3.02529	0.00248392	0.0237086	D2045.9
WBGene00018140	170.796	-0.450282	0.148851	-3.02506	0.00248587	0.0237086	F37B4.10
WBGene00020101	1412.7	0.317549	0.104979	3.0249	0.00248715	0.0237086	lmtr-5
WBGene00019412	195.116	-0.506737	0.167594	-3.0236	0.00249783	0.0237905	fbxb-49
WBGene00004100	61.3112	-0.550464	0.182075	-3.02329	0.00250043	0.0237991	pqn-8
WBGene00008031	335.221	0.421353	0.139424	3.02209	0.00251037	0.0238709	C39E9.7
WBGene00012098	79.1987	-0.575682	0.190499	-3.02197	0.00251138	0.0238709	fbxb-86
WBGene00009159	8756.39	0.24787	0.0820322	3.02161	0.00251432	0.0238826	F26E4.4
WBGene00019749	150.32	-0.448021	0.148302	-3.02101	0.00251933	0.023914	M03A8.3
WBGene00021202	329.349	-0.447598	0.148214	-3.01995	0.0025282	0.0239819	Y17G9B.5
WBGene00002055	467.12	0.467735	0.154995	3.01774	0.00254671	0.0241411	ifc-1
WBGene00006352	50434.4	0.242169	0.080268	3.017	0.0025529	0.0241834	sur-6
WBGene00009243	986.205	-0.283097	0.0938524	-3.0164	0.00255794	0.0241984	F29C6.1
WBGene00009629	736.721	0.401575	0.133129	3.01644	0.00255763	0.0241984	sprr-2
WBGene00000283	3114.28	0.311702	0.103376	3.01524	0.00256778	0.0242405	cah-5
WBGene00006450	8862.47	0.255768	0.0848204	3.01541	0.00256634	0.0242405	tag-77
WBGene00012100	2047.52	0.33249	0.110277	3.01506	0.00256931	0.0242405	sipa-1
WBGene00016235	11079.1	-0.271302	0.0899756	-3.01528	0.00256744	0.0242405	C29H12.2
WBGene00022821	406.341	-0.449232	0.149056	-3.01384	0.00257961	0.0243213	ZK813.2
WBGene00012041	130.569	-0.519704	0.172498	-3.01282	0.00258831	0.0243561	T26E3.8
WBGene00021419	6430.75	0.296882	0.0985328	3.01303	0.00258657	0.0243561	eri-5
WBGene00220094	320.918	0.450679	0.149588	3.0128	0.00258852	0.0243561	T25C12.12
WBGene00009280	69.611	-0.529983	0.175926	-3.01254	0.00259071	0.0243604	F31B9.3
WBGene00006437	31946.4	0.288375	0.0959033	3.00694	0.00263894	0.0247639	mrck-1
WBGene00007745	261.907	-0.415852	0.138292	-3.00706	0.00263788	0.0247639	C26D10.4
WBGene00077761	682.147	0.47259	0.157147	3.00731	0.00263575	0.0247639	zip-9
WBGene00018874	591.197	0.356852	0.118764	3.00472	0.0026583	0.0249289	tag-234
WBGene00000970	15689.3	0.318685	0.106085	3.00405	0.00266411	0.0249666	dhs-6
WBGene00016520	173.063	-0.476386	0.158601	-3.00368	0.00266739	0.0249806	C39B5.2
WBGene00018085	110.783	-0.568056	0.189142	-3.00333	0.00267042	0.0249863	ttr-20
WBGene00020601	13628.5	0.337099	0.112247	3.0032	0.00267156	0.0249863	T20B12.3
WBGene00003045	1694.66	-0.314793	0.104898	-3.00093	0.00269153	0.0251563	lir-2
WBGene00009430	3524.27	0.36808	0.122714	2.9995	0.0027042	0.0251964	F35E12.6
WBGene00009551	655.027	-0.341752	0.113932	-2.9996	0.00270331	0.0251964	mob-1
WBGene00013392	4364.68	-0.325594	0.108527	-3.00013	0.00269867	0.0251964	Y62H9A.4
WBGene00016489	3593.27	0.286437	0.0954897	2.99966	0.00270279	0.0251964	fubl-3
WBGene00018860	424.333	-0.358616	0.119561	-2.99943	0.00270483	0.0251964	vpat-1
WBGene00011059	1291.23	-0.290812	0.0969787	-2.99872	0.00271117	0.0252388	R06C1.4
WBGene00000380	52854.3	0.250845	0.083666	2.99818	0.00271602	0.0252454	cct-5
WBGene00001838	1408.14	0.267547	0.0892407	2.99803	0.00271729	0.0252454	hda-10
WBGene00022388	11546.4	0.235365	0.0785028	2.99817	0.00271603	0.0252454	zfr-1
WBGene00000298	1465.73	-0.356379	0.118909	-2.99707	0.00272587	0.0253083	cat-4
WBGene00020466	252.895	-0.480461	0.160332	-2.99667	0.00272949	0.0253251	sld-2
WBGene00000929	945.351	-0.279176	0.0931696	-2.99642	0.00273166	0.0253285	dao-3
WBGene00007950	225.039	-0.471866	0.157529	-2.99543	0.00274059	0.0253891	C35A5.6
WBGene00017934	1548.29	-0.268967	0.0898027	-2.99509	0.00274364	0.0253891	F30B5.4
WBGene00077690	343.642	0.366243	0.12228	2.99513	0.00274331	0.0253891	mtp-18
WBGene00013482	3351.37	0.280591	0.093711	2.99422	0.00275147	0.0254448	Y69H2.7
WBGene00009323	1093.4	-0.344867	0.115197	-2.9937	0.00275613	0.0254664	best-13
WBGene00011433	252.421	0.363672	0.121485	2.99356	0.00275745	0.0254664	pde-1
WBGene00011740	916.978	-0.339081	0.113278	-2.99335	0.00275937	0.0254673	mrpl-51
WBGene00008081	10981.1	0.234578	0.0783786	2.99289	0.00276354	0.025489	athp-1
WBGene00044423	140.276	-0.491501	0.164278	-2.99188	0.00277267	0.0255564	F53F10.8
WBGene00021687	139.71	-0.512414	0.171299	-2.99134	0.00277755	0.0255845	Y48G8AL.7
WBGene00013241	3836.67	0.296511	0.0991777	2.98969	0.00279262	0.0257064	ung-1
WBGene00000449	65.874	-0.551771	0.184614	-2.98878	0.0028009	0.0257657	ceh-27
WBGene00001092	626.396	-0.338962	0.113529	-2.98569	0.00282935	0.0260103	dro-1
WBGene00015145	769.744	-0.318699	0.106815	-2.98367	0.00284816	0.0261489	arle-14
WBGene00019404	31.8665	0.60098	0.201413	2.98383	0.00284669	0.0261489	K05B2.4
WBGene00017843	5570.3	0.33862	0.113522	2.98286	0.00285565	0.0262005	F26G5.1
WBGene00000145	1547.86	-0.310258	0.104034	-2.98228	0.00286106	0.0262314	apc-11
WBGene00015061	8439.8	0.322249	0.108061	2.9821	0.00286277	0.0262314	cpna-2
WBGene00022235	118757	0.291499	0.0977594	2.9818	0.00286559	0.0262401	sqd-1
WBGene00004765	1666.19	0.22743	0.0762859	2.98128	0.00287047	0.0262676	sel-8
WBGene00010912	16441.7	0.249611	0.0837403	2.98077	0.00287521	0.0262938	gmps-1
WBGene00020427	1450.23	0.358621	0.120322	2.98051	0.00287766	0.026299	sav-1
WBGene00006567	1393.27	-0.298436	0.100161	-2.97956	0.00288666	0.0263641	tgt-2
WBGene00018717	1557.11	0.304501	0.102217	2.97896	0.00289225	0.0263884	F52H2.5
WBGene00021883	1428.68	-0.297257	0.0997951	-2.97867	0.00289498	0.0263884	Y54G2A.18
WBGene00021884	134.288	-0.543154	0.182338	-2.97883	0.00289349	0.0263884	Y54G2A.19
WBGene00012544	20618.1	0.227706	0.0764504	2.97847	0.00289687	0.0263885	Y37D8A.2
WBGene00001087	20102.8	0.240227	0.0806618	2.9782	0.00289942	0.0263921	dpy-28
WBGene00021156	226.694	0.407165	0.136723	2.97803	0.00290104	0.0263921	Y4C6B.2
WBGene00013253	2994.13	0.24932	0.083752	2.97688	0.00291197	0.02644	Y57A10A.8
WBGene00016678	94.8285	-0.539414	0.181199	-2.97692	0.00291159	0.02644	txbp-3
WBGene00022281	3322.68	-0.249925	0.0839523	-2.97699	0.00291091	0.02644	abtm-1
WBGene00010058	34.3887	-0.59711	0.20067	-2.97558	0.00292436	0.0265353	F54E4.2
WBGene00007089	8270.03	0.239437	0.0804731	2.97537	0.00292636	0.0265362	B0001.4
WBGene00004889	7185.44	0.25883	0.0870195	2.97439	0.00293573	0.0265696	smp-1
WBGene00017144	8270.08	0.237948	0.0799949	2.97454	0.00293428	0.0265696	brap-2
WBGene00019938	3646.98	0.262511	0.088252	2.97456	0.00293412	0.0265696	R07E4.5
WBGene00006415	5175.17	0.262463	0.0882831	2.97297	0.00294933	0.0266754	tag-30
WBGene00019010	131.231	0.469791	0.158118	2.97114	0.00296701	0.026818	glo-2
WBGene00008477	18.6898	0.536001	0.180465	2.97011	0.00297694	0.0268801	clec-17
WBGene00009710	10.612	0.520845	0.175367	2.97003	0.00297771	0.0268801	F44G3.10
WBGene00007604	671.38	0.445198	0.149928	2.96942	0.00298363	0.0268988	xbx-9
WBGene00044493	281.035	-0.439076	0.147862	-2.96949	0.00298293	0.0268988	Y54G2A.50
WBGene00010197	2771.37	-0.317609	0.106975	-2.96899	0.00298781	0.0269018	F57C2.5
WBGene00018298	174.797	0.418366	0.140909	2.96905	0.00298719	0.0269018	nlp-50
WBGene00007421	115.158	-0.533161	0.17964	-2.96795	0.00299796	0.0269758	C07H4.1
WBGene00017607	10013.2	0.239233	0.0806228	2.96732	0.00300412	0.0270139	F19F10.11
WBGene00001945	422.153	-0.319972	0.107852	-2.96675	0.00300961	0.027046	his-71
WBGene00023417	224.213	-0.440162	0.148425	-2.96554	0.00302151	0.0271354	swm-1
WBGene00001310	12.9788	-0.56833	0.19192	-2.96128	0.00306365	0.0274786	end-1
WBGene00013443	9535.03	0.225673	0.076208	2.96128	0.0030636	0.0274786	such-1
WBGene00007030	21472	0.266993	0.0902106	2.95966	0.00307981	0.0276059	epc-1
WBGene00003904	6606.31	-0.286598	0.0968448	-2.95936	0.0030828	0.0276151	pabp-2
WBGene00013687	8197.01	0.196101	0.0662871	2.95836	0.0030928	0.0276869	exoc-8
WBGene00007801	492.085	0.36418	0.12312	2.95793	0.00309714	0.0277019	trpa-1
WBGene00021401	3440.41	0.298739	0.101	2.9578	0.00309844	0.0277019	prdx-6
WBGene00000203	1254	-0.233585	0.079001	-2.95673	0.00310917	0.0277291	arx-5
WBGene00001808	1407.07	-0.355003	0.12005	-2.95711	0.00310535	0.0277291	gut-2
WBGene00002054	3077.78	0.368342	0.124606	2.95606	0.00311595	0.0277291	ifb-2
WBGene00004989	1619.62	0.405455	0.137161	2.95605	0.0031161	0.0277291	spp-4
WBGene00008502	16917	0.187719	0.0634893	2.9567	0.00310954	0.0277291	skih-2
WBGene00008558	153.726	0.471717	0.159568	2.95622	0.00311433	0.0277291	F07H5.7
WBGene00009070	45.0949	0.589343	0.199377	2.95593	0.00311732	0.0277291	F23A7.5
WBGene00019217	26102.9	0.212619	0.0719144	2.95656	0.0031109	0.0277291	athp-2
WBGene00012317	1496.86	-0.260835	0.088249	-2.95567	0.00311987	0.0277342	ztf-6
WBGene00003877	5490.6	0.344784	0.116676	2.95504	0.0031263	0.0277737	pept-1
WBGene00016092	12.2173	0.515508	0.17448	2.95454	0.00313138	0.0278012	cyp-33B1
WBGene00022130	420.292	0.354738	0.120078	2.95423	0.00313451	0.0278113	Y71F9B.9
WBGene00006479	1887.93	-0.266888	0.0903618	-2.95355	0.0031414	0.0278196	tmbi-4
WBGene00010083	1593.57	0.318452	0.10782	2.95355	0.00314139	0.0278196	xdh-1
WBGene00016971	19405.4	0.247409	0.0837658	2.95359	0.00314106	0.0278196	toe-2
WBGene00000866	9766.59	-0.229151	0.0776185	-2.95227	0.00315444	0.0278822	cyb-2.1
WBGene00004204	58328	0.28082	0.0951169	2.95237	0.00315346	0.0278822	swsn-4
WBGene00006605	18644.1	0.224663	0.0760904	2.95258	0.00315127	0.0278822	tra-2
WBGene00017431	3031.71	0.271069	0.0918539	2.95109	0.00316655	0.0279715	cest-33
WBGene00006831	1872.95	0.251007	0.0850647	2.95078	0.00316977	0.0279823	unc-104
WBGene00012695	4296.46	0.254141	0.0861369	2.95044	0.00317325	0.0279954	Y39B6A.37
WBGene00022741	309.991	-0.357487	0.121199	-2.94959	0.003182	0.0280549	ZK430.5
WBGene00009829	3559.16	-0.304617	0.103314	-2.94846	0.00319357	0.0281392	tmed-10
WBGene00016867	1707.32	-0.292289	0.09915	-2.94795	0.0031989	0.0281507	C52B9.4
WBGene00018009	5167.39	-0.31017	0.105211	-2.94806	0.00319772	0.0281507	dhhc-3
WBGene00015965	686.372	-0.314171	0.10659	-2.94746	0.00320394	0.0281774	ugt-48
WBGene00022172	1373.43	-0.314068	0.106591	-2.94649	0.00321406	0.0282486	cosa-1
WBGene00020690	95.947	-0.50598	0.171798	-2.9452	0.0032275	0.028349	T22E5.1
WBGene00001263	34224.6	0.401574	0.136411	2.94386	0.00324148	0.028421	emb-9
WBGene00003659	1006.62	0.268227	0.0911124	2.94392	0.00324086	0.028421	nhr-69
WBGene00011662	10766.6	-0.285133	0.0968642	-2.94363	0.00324383	0.028421	T09F3.2
WBGene00013704	397.791	-0.400697	0.136117	-2.94377	0.00324245	0.028421	Y106G6D.8
WBGene00007436	1360.24	0.293779	0.0998427	2.94242	0.00325656	0.028497	C08B11.9
WBGene00206493	17.6727	0.583941	0.198453	2.94247	0.00325605	0.028497	Y38H8A.12
WBGene00077757	269.15	-0.522872	0.177714	-2.94221	0.0032588	0.0284987	E02H4.7
WBGene00000514	682.191	0.2899	0.0985803	2.94075	0.00327417	0.0286153	ckb-4
WBGene00012386	21115.2	0.252682	0.0859345	2.9404	0.00327784	0.0286294	agef-1
WBGene00002231	15728.4	0.25546	0.0868948	2.93987	0.00328346	0.0286607	knl-1
WBGene00004390	2873.89	0.267451	0.0909885	2.93939	0.00328859	0.0286738	rnp-7
WBGene00013268	1628.73	-0.280291	0.0953645	-2.93915	0.00329111	0.0286738	tric-1B.2
WBGene00015565	10066.3	0.325861	0.110868	2.93918	0.00329077	0.0286738	C07D8.6
WBGene00004061	909.343	0.302409	0.102909	2.93862	0.00329678	0.028685	pmp-4
WBGene00013719	5488.78	-0.275842	0.0938732	-2.93845	0.00329854	0.028685	Y106G6H.6
WBGene00018769	5072.53	-0.284857	0.0969367	-2.93859	0.00329707	0.028685	mnat-1
WBGene00000884	1206.58	-0.265198	0.0902573	-2.93824	0.00330081	0.0286869	cyn-8
WBGene00077698	89.2047	0.53189	0.181059	2.93767	0.00330693	0.0287223	lurp-4
WBGene00004244	7482.61	-0.313094	0.106598	-2.93715	0.00331244	0.0287345	puf-8
WBGene00004887	1670.2	-0.248618	0.0846439	-2.93722	0.00331173	0.0287345	smn-1
WBGene00019700	110.635	-0.480609	0.163682	-2.93624	0.00332222	0.0288015	btb-11
WBGene00001233	4057.76	-0.243724	0.08306	-2.93431	0.0033429	0.0289359	eif-3.K
WBGene00020509	6587.72	-0.222529	0.0758392	-2.93422	0.00334392	0.0289359	hex-1
WBGene00021764	6208.66	0.272729	0.0929469	2.93425	0.00334353	0.0289359	Y51F10.3
WBGene00010962	105772	-0.36337	0.123854	-2.93386	0.00334777	0.0289513	ctc-3
WBGene00013530	21323.7	0.272769	0.0929886	2.93337	0.00335309	0.0289794	ntl-11
WBGene00001058	36350.1	0.278876	0.0950774	2.93315	0.00335543	0.0289817	dpf-5
WBGene00009056	55.1991	-0.575559	0.19627	-2.93248	0.00336262	0.029026	F22D6.15
WBGene00004705	660.226	-0.375192	0.127958	-2.93215	0.00336624	0.0290393	rsp-8
WBGene00004238	1391.44	-0.239844	0.0818787	-2.92925	0.00339777	0.0292161	ptr-24
WBGene00012558	524.165	-0.355528	0.121338	-2.93007	0.00338888	0.0292161	rbm-7
WBGene00012738	1024.25	-0.335166	0.114412	-2.92945	0.0033956	0.0292161	eif-3.J
WBGene00019245	9109.93	0.22436	0.0765943	2.9292	0.00339839	0.0292161	sacy-1
WBGene00020836	333.393	-0.382906	0.130696	-2.92975	0.00339233	0.0292161	lgc-34
WBGene00021510	464.031	-0.365464	0.124769	-2.92912	0.00339926	0.0292161	frpr-19
WBGene00000216	48861.1	0.37849	0.129247	2.92843	0.0034068	0.029263	asp-3
WBGene00009272	6643.03	-0.287691	0.0982682	-2.92761	0.00341575	0.0293039	gras-1
WBGene00016788	610.237	-0.345109	0.117877	-2.9277	0.00341481	0.0293039	C49G7.10
WBGene00013432	352.51	0.410515	0.140269	2.92662	0.00342664	0.0293613	Y66D12A.6
WBGene00022445	37.0926	-0.578571	0.197692	-2.92663	0.00342654	0.0293613	Y110A2AL.9
WBGene00219964	2067.41	0.391702	0.133876	2.92586	0.00343508	0.0294156	F52G3.6
WBGene00002994	11860.8	0.300222	0.102626	2.9254	0.00344008	0.0294405	lin-5
WBGene00019508	23.3584	0.587657	0.200949	2.92441	0.00345115	0.0295171	K07H8.8
WBGene00007113	5681.29	0.336802	0.115214	2.92329	0.00346355	0.029569	B0035.15
WBGene00018704	265.03	-0.331278	0.113315	-2.92352	0.00346094	0.029569	ztf-13
WBGene00021114	340.895	-0.395671	0.135343	-2.92347	0.00346158	0.029569	W09C3.7
WBGene00022490	377.938	-0.400341	0.13701	-2.92198	0.00347815	0.0296756	nspg-8
WBGene00022265	402.249	-0.333812	0.114252	-2.92173	0.00348095	0.0296813	Y73C8C.8
WBGene00044774	28.1094	-0.583909	0.19988	-2.9213	0.00348573	0.029704	F16B3.3
WBGene00009556	348.226	-0.377623	0.129388	-2.91853	0.00351689	0.0299513	F39B2.5
WBGene00008133	1589.35	0.241896	0.0829137	2.91745	0.00352911	0.0300371	efsc-1
WBGene00019824	3555.53	-0.299985	0.102831	-2.91725	0.00353131	0.0300376	R02D3.7
WBGene00018598	464.629	-0.406466	0.139388	-2.91607	0.00354476	0.0301337	F48C1.5
WBGene00009779	54.1218	0.53949	0.185031	2.91568	0.0035492	0.0301531	F46C5.2
WBGene00012472	4331.15	0.277332	0.0951298	2.9153	0.00355349	0.0301713	Y17G7B.21
WBGene00010001	406.626	0.414672	0.142255	2.915	0.00355692	0.0301821	F53F8.4
WBGene00012094	673.873	-0.376234	0.129099	-2.91429	0.00356494	0.0302318	T27E9.2
WBGene00009654	9048.3	0.242876	0.0833552	2.91375	0.00357114	0.030266	sly-1
WBGene00022759	38259.2	0.317439	0.108957	2.91343	0.00357486	0.0302793	ZK546.2
WBGene00018646	55.1571	0.574864	0.197356	2.91283	0.00358168	0.0303187	mul-1
WBGene00003373	3752.55	0.223982	0.0769309	2.91147	0.00359734	0.0304329	mlh-1
WBGene00015815	2927.87	-0.268239	0.0921386	-2.91125	0.0035998	0.0304353	C16A11.2
WBGene00004703	12291.1	-0.275448	0.0946587	-2.90991	0.00361532	0.0305296	rsp-6
WBGene00009834	426.593	-0.353984	0.121644	-2.91	0.00361434	0.0305296	lsy-27
WBGene00018731	518.417	0.566064	0.194552	2.90958	0.00361919	0.0305438	F53A9.8
WBGene00022880	22602.3	0.29262	0.100618	2.90823	0.00363483	0.0306574	tbc-2
WBGene00017830	2032.64	-0.315063	0.108347	-2.90789	0.00363876	0.030672	rpb-8
WBGene00001749	6290.24	-0.303966	0.104555	-2.90722	0.00364651	0.0307189	gst-1
WBGene00017816	39831.1	0.254898	0.0876833	2.90703	0.00364881	0.0307198	hrpk-1
WBGene00044644	19.5753	-0.569014	0.195796	-2.90615	0.00365904	0.0307874	B0205.13
WBGene00001499	21214.9	0.290228	0.0998784	2.90581	0.00366298	0.030802	fsn-1
WBGene00002889	32654.5	0.222001	0.0764342	2.90448	0.00367865	0.0308967	let-765
WBGene00018735	2741.86	0.243202	0.0837322	2.90453	0.00367809	0.0308967	F53B1.2
WBGene00010204	62702.8	0.222618	0.0766938	2.90268	0.00369986	0.0310314	cpr-9
WBGene00012645	1037.74	-0.296836	0.102267	-2.90255	0.00370134	0.0310314	mrpl-22
WBGene00016469	1502.56	-0.266691	0.0918737	-2.9028	0.00369845	0.0310314	C36B7.6
WBGene00015842	332.458	-0.49845	0.171811	-2.90116	0.00371788	0.0311514	C16C8.4
WBGene00015811	2368.5	0.241922	0.0834064	2.90053	0.00372538	0.0311956	C16A3.6
WBGene00011238	10.5928	-0.54426	0.187724	-2.89926	0.00374048	0.0313033	ugt-59
WBGene00001149	9637.44	0.20441	0.07051	2.89902	0.00374328	0.031308	bcat-1
WBGene00011637	2174	-0.322981	0.111426	-2.89861	0.00374826	0.031331	sds-22
WBGene00022459	20869.4	0.230774	0.0796246	2.89827	0.00375225	0.0313456	Y110A7A.9
WBGene00015610	106.255	-0.501342	0.173066	-2.89683	0.00376953	0.0314712	C08F1.6
WBGene00050914	69.6753	-0.544276	0.187973	-2.8955	0.0037855	0.0315857	T12B5.15
WBGene00006986	625.238	0.354898	0.122586	2.8951	0.00379043	0.0316009	zip-1
WBGene00017298	1318.51	0.298624	0.103152	2.89498	0.00379184	0.0316009	toca-1
WBGene00003961	16100.9	0.206459	0.0713534	2.89348	0.00381003	0.0317171	pct-1
WBGene00017834	21045.1	0.214141	0.0740088	2.89345	0.00381031	0.0317171	F26F12.3
WBGene00008403	418.779	-0.366454	0.126709	-2.89209	0.00382688	0.0318361	csa-1
WBGene00010137	79.5196	-0.539771	0.18667	-2.89158	0.00383315	0.0318693	ztf-26
WBGene00017600	264.736	0.430142	0.14878	2.89114	0.00383851	0.031876	ttr-10
WBGene00021899	4752.43	0.222642	0.0770084	2.89114	0.00383851	0.031876	Y54H5A.1
WBGene00013694	3973.02	0.286111	0.0990101	2.88971	0.00385593	0.0319827	mekk-3
WBGene00022791	4555.43	0.486684	0.168418	2.88974	0.00385556	0.0319827	ZK686.1
WBGene00004270	609.298	-0.330106	0.114271	-2.8888	0.0038672	0.0320383	rab-6.2
WBGene00011528	471.397	-0.339382	0.117477	-2.88891	0.00386575	0.0320383	fndc-1
WBGene00015974	4529.4	0.301974	0.104548	2.88839	0.00387224	0.032061	snrp-40.2
WBGene00001898	160.634	-0.505383	0.175008	-2.88777	0.00387984	0.032105	his-24
WBGene00004895	10820.3	0.258306	0.0895333	2.88503	0.00391378	0.0323667	smu-1
WBGene00003230	20140.4	-0.321237	0.111363	-2.8846	0.00391906	0.0323912	mex-5
WBGene00013720	214.555	-0.487745	0.169185	-2.8829	0.00394029	0.0325283	Y106G6H.8
WBGene00021563	937.118	-0.263511	0.0913996	-2.88306	0.00393829	0.0325283	Y45G12B.2
WBGene00010047	2511.64	0.274075	0.0951045	2.88183	0.0039537	0.0326198	F54D1.6
WBGene00016099	285.23	-0.40061	0.139111	-2.87978	0.00397947	0.0328131	C25E10.10
WBGene00001137	132830	0.305505	0.106101	2.87937	0.00398472	0.032837	eat-6
WBGene00017426	509.667	0.431201	0.149803	2.87846	0.00399623	0.0329125	F13C5.5
WBGene00003963	21159	0.310027	0.107716	2.87819	0.00399958	0.0329207	pdi-2
WBGene00011981	66.2448	-0.502938	0.17479	-2.87738	0.00400995	0.0329673	enri-2
WBGene00022072	126.624	-0.468435	0.162796	-2.87743	0.00400926	0.0329673	cpg-9
WBGene00021977	858.983	-0.329506	0.114535	-2.87689	0.00401612	0.0329986	Y58A7A.3
WBGene00015282	13821.8	0.1865	0.0648393	2.87635	0.00402304	0.0330361	C01B10.8
WBGene00009297	112.813	-0.44358	0.154298	-2.87482	0.00404256	0.0331381	sdz-16
WBGene00019484	15.5235	-0.560027	0.1948	-2.87487	0.00404188	0.0331381	K07D4.4
WBGene00021732	7758.15	0.281918	0.0980617	2.87491	0.00404144	0.0331381	Y49G5B.1
WBGene00008237	3706.19	-0.280622	0.0976213	-2.8746	0.0040454	0.033142	nstp-10
WBGene00000424	5458.18	-0.231538	0.0805593	-2.87413	0.00405139	0.0331717	ced-10
WBGene00013373	2652.17	-0.261691	0.09106	-2.87383	0.00405524	0.0331838	popl-7
WBGene00003064	2054.57	-0.254101	0.0884312	-2.87343	0.00406036	0.0332063	nfu-1
WBGene00010619	182.227	-0.472868	0.164596	-2.87291	0.0040671	0.0332419	K07A1.15
WBGene00008398	433.49	-0.46959	0.163482	-2.87242	0.00407339	0.0332739	D2005.3
WBGene00001769	41.9744	0.57598	0.200554	2.87195	0.00407947	0.0332848	gst-21
WBGene00011791	230.015	-0.377542	0.131457	-2.87197	0.00407916	0.0332848	pap-2
WBGene00006708	8468.95	-0.237686	0.0827839	-2.87116	0.00408974	0.0333491	ubc-13
WBGene00044200	478.099	0.398025	0.138659	2.87053	0.00409787	0.0333959	H37A05.4
WBGene00020718	6336.62	0.282455	0.0984352	2.86945	0.00411181	0.03349	mrps-2
WBGene00002201	32605.8	0.1874	0.0653141	2.86921	0.004115	0.0334966	kin-18
WBGene00016987	885.371	-0.342029	0.119276	-2.86753	0.00413689	0.0336552	CC8.2
WBGene00000392	1521.81	-0.332845	0.116098	-2.86692	0.00414487	0.0337005	cdd-2
WBGene00014224	241.072	-0.419116	0.146206	-2.86661	0.00414894	0.0337096	mrps-23
WBGene00021922	2282.64	0.326622	0.113946	2.86647	0.0041508	0.0337096	atg-3
WBGene00009937	4676.4	-0.298095	0.104011	-2.86599	0.00415713	0.0337316	lsl-1
WBGene00086557	154.655	0.489679	0.170864	2.86589	0.00415833	0.0337316	K07A12.8
WBGene00045271	191.929	-0.442738	0.154535	-2.86497	0.00417051	0.0338108	F07G6.10
WBGene00016120	5959.91	0.336315	0.117524	2.86168	0.00421402	0.034128	C25H3.11
WBGene00017951	17588.6	0.233701	0.0816685	2.86158	0.00421535	0.034128	panl-2
WBGene00045245	44.6738	-0.554816	0.193893	-2.86146	0.00421695	0.034128	ttr-34
WBGene00000277	1701.34	-0.285041	0.0996489	-2.86045	0.0042304	0.0342171	cab-1
WBGene00009507	15237.2	0.204166	0.0713965	2.85961	0.00424164	0.0342882	mus-101
WBGene00010585	335.112	-0.424357	0.148451	-2.85857	0.00425555	0.0343809	K05C4.9
WBGene00009268	476.507	0.348368	0.121876	2.85838	0.00425807	0.0343813	F30A10.11
WBGene00012553	4238.73	-0.26421	0.092443	-2.85809	0.00426198	0.0343931	cox-5A
WBGene00022649	154.151	0.489727	0.171417	2.85694	0.0042775	0.0344984	ZK84.1
WBGene00013074	1571.75	0.255906	0.0895793	2.85675	0.00428005	0.0344991	hmit-1.2
WBGene00009493	439.513	-0.383235	0.134188	-2.85596	0.00429072	0.0345494	hrg-4
WBGene00013029	486.911	-0.391827	0.137216	-2.85556	0.00429616	0.0345494	glrx-5
WBGene00021909	2072.43	0.248239	0.0869308	2.8556	0.00429561	0.0345494	Y55B1BL.1
WBGene00022428	798.213	-0.353356	0.123732	-2.85582	0.0042926	0.0345494	rmif-2
WBGene00004978	9606.04	0.271542	0.0951456	2.85396	0.00431776	0.0346833	spg-7
WBGene00006912	3207.96	-0.348756	0.122198	-2.85403	0.00431688	0.0346833	vha-3
WBGene00001426	2314.33	-0.258152	0.0905491	-2.85096	0.00435879	0.0349876	fkb-1
WBGene00020382	1290.11	-0.317107	0.11124	-2.85067	0.00436275	0.0349876	T09B4.8
WBGene00020500	1452.21	-0.308703	0.108293	-2.85064	0.00436314	0.0349876	T14B4.3
WBGene00015788	50.4757	0.557266	0.195514	2.85026	0.00436841	0.0350098	C15B12.8
WBGene00021275	106.888	0.534548	0.187582	2.84968	0.00437633	0.0350532	dmsr-2
WBGene00017691	6218.32	0.341383	0.119817	2.84921	0.00438273	0.0350844	ilys-5
WBGene00006793	5952.65	-0.254814	0.0894518	-2.84861	0.00439101	0.0351106	unc-59
WBGene00021979	89.2112	-0.511954	0.179721	-2.84861	0.00439102	0.0351106	Y58A7A.5
WBGene00015477	1187.1	-0.237439	0.0833614	-2.84831	0.00439524	0.0351243	attf-4
WBGene00020401	216.292	0.411905	0.144663	2.84734	0.00440859	0.0352109	T10B11.5
WBGene00002153	16963.3	0.222899	0.0783288	2.84568	0.00443161	0.0353745	iars-2
WBGene00015505	2118.29	0.295809	0.10397	2.84513	0.00443931	0.0354158	C06A5.8
WBGene00000905	339.739	0.473477	0.16644	2.84473	0.00444489	0.0354401	daf-9
WBGene00006715	5374.26	-0.25637	0.0901478	-2.84389	0.00445663	0.0354811	ubc-20
WBGene00010283	9272.96	0.221389	0.0778493	2.84382	0.00445763	0.0354811	ccz-1
WBGene00016659	13.5681	0.542193	0.190656	2.84382	0.00445756	0.0354811	C45B2.2
WBGene00007090	1352.84	0.242274	0.0852232	2.84282	0.00447161	0.0355318	B0001.5
WBGene00008085	510.365	-0.355445	0.125028	-2.84294	0.00447	0.0355318	smcl-1
WBGene00016578	220.609	-0.461108	0.162182	-2.84316	0.00446687	0.0355318	sdz-5
WBGene00006910	7472.54	-0.271115	0.0953752	-2.84262	0.00447445	0.0355342	vha-1
WBGene00009996	6023.66	0.245786	0.0864759	2.84225	0.00447965	0.0355553	sde-2
WBGene00009801	3299.78	0.305398	0.107458	2.84203	0.00448273	0.0355596	ipla-2
WBGene00011010	5883.88	0.236584	0.0832502	2.84184	0.00448534	0.0355602	R04D3.2
WBGene00012471	14033.3	0.248127	0.0873578	2.84035	0.00450641	0.035707	Y17G7B.20
WBGene00021050	1584.54	-0.321398	0.113162	-2.84015	0.00450928	0.0357096	W05H9.3
WBGene00001835	7293.89	0.245921	0.0866168	2.83918	0.00452289	0.0357742	hda-2
WBGene00003983	828.036	-0.360512	0.126975	-2.83924	0.00452215	0.0357742	pes-10
WBGene00007666	6710.02	0.278667	0.0981556	2.83903	0.00452511	0.0357742	C18B12.4
WBGene00008418	6988.69	-0.257931	0.0908786	-2.83819	0.00453696	0.0358072	D2030.8
WBGene00013994	16141.1	0.213193	0.0751129	2.83829	0.00453553	0.0358072	ZK524.4
WBGene00022534	7647.06	0.25195	0.0887651	2.83839	0.00453421	0.0358072	syx-16
WBGene00013079	236.318	0.391773	0.138093	2.83702	0.00455373	0.0359193	ttr-26
WBGene00045418	785.038	-0.320364	0.112958	-2.83614	0.00456621	0.0359975	F15B9.10
WBGene00007493	13826.9	0.274028	0.0966353	2.83569	0.00457261	0.0360074	npp-23
WBGene00010625	1984.77	-0.290614	0.102484	-2.8357	0.00457258	0.0360074	K07C5.2
WBGene00012217	83.426	0.537667	0.189659	2.83492	0.00458373	0.0360747	W02H3.1
WBGene00045053	89.0291	-0.498775	0.175957	-2.83463	0.00458782	0.0360866	K12C11.7
WBGene00003634	153.563	0.464689	0.163955	2.83425	0.0045934	0.0360945	nhr-44
WBGene00015043	826.912	-0.290288	0.102423	-2.8342	0.00459399	0.0360945	cyp-34A8
WBGene00017005	824.292	-0.314553	0.111004	-2.8337	0.00460127	0.0361315	D1007.8
WBGene00021644	7679.63	0.271594	0.0958513	2.83349	0.00460424	0.0361345	Y47G6A.18
WBGene00010407	500.888	-0.329299	0.116236	-2.83302	0.0046111	0.0361681	scb-1
WBGene00001049	6513.17	0.211721	0.074749	2.83243	0.00461959	0.0361994	dog-1
WBGene00008456	2203.44	-0.262541	0.0926927	-2.83238	0.00462026	0.0361994	eral-1
WBGene00011263	180.833	-0.457566	0.161559	-2.83219	0.00462301	0.0362007	R13H4.5
WBGene00017818	395.557	-0.36807	0.129969	-2.83197	0.0046262	0.0362054	F26D11.1
WBGene00235256	1495.36	0.298968	0.10559	2.83139	0.00463456	0.0362505	Y54G11A.19
WBGene00012958	193.226	-0.40329	0.14253	-2.8295	0.00466201	0.0364449	Y47H10A.2
WBGene00011407	683.538	-0.280924	0.0993019	-2.82899	0.00466946	0.0364827	ppat-1
WBGene00003539	475.824	-0.402171	0.142175	-2.8287	0.00467375	0.0364896	nas-20
WBGene00016144	1549.37	-0.328014	0.115964	-2.82858	0.00467554	0.0364896	mmab-1
WBGene00050941	3394.99	0.340402	0.120442	2.82626	0.00470946	0.0367338	C33F10.14
WBGene00002045	18294.2	0.238357	0.084346	2.82595	0.00471412	0.0367497	icd-1
WBGene00019652	14.9523	0.528072	0.186898	2.82546	0.00472132	0.0367853	cest-34
WBGene00016229	663.886	0.316526	0.112046	2.82497	0.00472855	0.0368211	#N/A
WBGene00004169	1408.5	0.283652	0.100435	2.82425	0.00473921	0.0368837	pqn-89
WBGene00002335	9316.74	-0.264369	0.0936267	-2.82365	0.00474801	0.0369111	let-60
WBGene00013273	287.248	0.356502	0.126255	2.82367	0.00474774	0.0369111	44625
WBGene00007221	9039.06	-0.260537	0.0922842	-2.82321	0.00475462	0.0369419	cpna-3
WBGene00013433	116.256	-0.498274	0.176517	-2.82281	0.00476042	0.0369665	Y66D12A.7
WBGene00008414	662.365	-0.353322	0.125181	-2.82249	0.00476519	0.0369831	D2030.4
WBGene00012212	1220.55	0.376261	0.133362	2.82135	0.00478227	0.037095	W02D9.6
WBGene00008927	264.094	-0.346401	0.122799	-2.82088	0.00478919	0.0371282	snx-17
WBGene00004874	31962.4	0.231677	0.0821387	2.82056	0.004794	0.0371449	smc-4
WBGene00004068	19024.6	0.230783	0.0818467	2.8197	0.00480687	0.037224	pnk-1
WBGene00021637	1497.37	0.238872	0.0847694	2.81791	0.00483379	0.0374117	Y47G6A.7
WBGene00013698	253.616	-0.456443	0.162044	-2.81678	0.00485081	0.0375228	Y106G6D.1
WBGene00009237	4696.41	-0.264858	0.0940415	-2.81639	0.00485664	0.0375471	F28H7.3
WBGene00016335	774.775	0.378995	0.13461	2.81551	0.00486998	0.0376295	gba-1
WBGene00008173	734.616	-0.287824	0.102237	-2.81527	0.00487358	0.0376365	C48B4.10
WBGene00017549	620.449	-0.407873	0.144899	-2.81489	0.00487947	0.0376612	pid-1
WBGene00002234	929.952	0.289748	0.102989	2.81339	0.00490221	0.0378159	kqt-2
WBGene00006392	474.034	-0.336133	0.119494	-2.81297	0.00490868	0.0378449	taf-10
WBGene00012398	32.1523	0.56604	0.201262	2.81246	0.00491645	0.037884	Y6E2A.4
WBGene00012584	7537.59	0.307822	0.109486	2.81152	0.00493086	0.0379741	ceh-100
WBGene00002696	2029.09	0.305735	0.108751	2.81133	0.00493368	0.037975	let-504
WBGene00004283	1285.59	-0.240049	0.0853921	-2.81114	0.00493668	0.0379772	rab-33
WBGene00000542	17135.8	0.251489	0.0894843	2.81042	0.0049477	0.038041	clp-1
WBGene00003473	40.0204	0.559878	0.199229	2.81022	0.00495082	0.0380441	mtl-1
WBGene00008177	352.918	-0.368685	0.131221	-2.80965	0.00495961	0.0380813	C48D1.1
WBGene00016628	186.004	0.41815	0.148832	2.80955	0.0049611	0.0380813	slc-36.5
WBGene00006607	14359.6	-0.226655	0.0806993	-2.80863	0.00497523	0.038148	tre-1
WBGene00022614	146.058	-0.441956	0.157347	-2.8088	0.00497263	0.038148	ZC449.4
WBGene00010833	98.2768	-0.439225	0.156433	-2.80775	0.00498888	0.0381899	M03B6.1
WBGene00017852	4546.38	-0.231353	0.0823899	-2.80802	0.00498467	0.0381899	F27C1.2
WBGene00023502	24.7385	-0.564979	0.201211	-2.8079	0.00498658	0.0381899	clec-184
WBGene00011635	1037.55	-0.37689	0.134294	-2.80645	0.00500906	0.0383234	mdmh-35
WBGene00001030	19695	0.196305	0.0699841	2.80499	0.00503175	0.038466	dnj-12
WBGene00002078	108886	0.299876	0.106925	2.80455	0.00503869	0.038466	xpo-1
WBGene00018113	101.522	0.475147	0.169418	2.80459	0.00503814	0.038466	F36H9.5
WBGene00020097	65677.3	0.279639	0.0996991	2.80483	0.00503425	0.038466	larp-1
WBGene00010989	312.912	-0.362171	0.129165	-2.80394	0.0050483	0.0384974	R03D7.2
WBGene00044891	1553.04	0.227002	0.0809539	2.80409	0.0050459	0.0384974	T07C4.12
WBGene00022817	13328.8	0.269787	0.0962782	2.80216	0.00507617	0.0386889	upp-1
WBGene00004951	16972.1	0.362787	0.129476	2.80196	0.00507933	0.0386919	spc-1
WBGene00003805	5967.74	-0.186584	0.0666196	-2.80074	0.00509854	0.0388171	npp-19
WBGene00000103	804.73	0.24703	0.088225	2.8	0.00511019	0.0388635	akt-2
WBGene00020235	5822.45	0.20151	0.0719655	2.80009	0.00510885	0.0388635	T05A12.4
WBGene00015362	337.587	0.343007	0.12259	2.798	0.005142	0.0390842	fbxa-105
WBGene00013673	48.8459	-0.526207	0.188088	-2.79767	0.0051473	0.0391033	Y105E8A.13
WBGene00022597	275.34	-0.441161	0.157728	-2.79697	0.00515835	0.039166	ZC395.5
WBGene00006545	14.3143	-0.537374	0.192148	-2.79668	0.00516314	0.0391811	tbx-8
WBGene00006220	1280.99	-0.343642	0.122894	-2.79625	0.00516998	0.0392118	str-176
WBGene00044798	13.5998	-0.532899	0.190598	-2.79593	0.00517504	0.0392289	tbx-43
WBGene00000006	97.7958	-0.516922	0.185055	-2.79334	0.00521662	0.0393737	aat-5
WBGene00006740	1576.44	-0.326406	0.116804	-2.79448	0.00519839	0.0393737	ulp-5
WBGene00008372	210.231	0.43732	0.156552	2.79344	0.00521501	0.0393737	D1054.5
WBGene00010646	790.996	-0.250727	0.0897452	-2.79376	0.00520992	0.0393737	K08C7.1
WBGene00011859	272.835	-0.414678	0.148452	-2.79334	0.00521664	0.0393737	T20D3.6
WBGene00011916	8423.72	0.293872	0.105178	2.79404	0.00520533	0.0393737	T22C1.5
WBGene00015126	10446.4	0.188401	0.0674432	2.79348	0.00521445	0.0393737	B0303.4
WBGene00220040	615.744	0.310127	0.111013	2.79362	0.00521215	0.0393737	R10E11.13
WBGene00022801	2358.36	-0.284386	0.101817	-2.79311	0.00522042	0.039381	pcp-5
WBGene00011324	2927.79	-0.274195	0.0982096	-2.79193	0.00523939	0.0395028	hrde-2
WBGene00008684	18897.7	0.248978	0.0892017	2.79118	0.00525169	0.039553	mig-32
WBGene00011704	43.9145	-0.555574	0.199037	-2.79131	0.00524948	0.039553	sdz-31
WBGene00000097	990.96	-0.289614	0.10377	-2.79091	0.00525604	0.0395558	aip-1
WBGene00008152	18.1307	-0.54536	0.195413	-2.7908	0.00525772	0.0395558	C47E12.9
WBGene00000089	176.096	-0.443176	0.15882	-2.79043	0.00526386	0.0395757	aex-6
WBGene00007315	2073.38	0.369853	0.13255	2.79029	0.00526602	0.0395757	C04H5.7
WBGene00000696	13497.9	-0.361509	0.129573	-2.79001	0.00527065	0.0395893	col-122
WBGene00011109	4607.56	0.198573	0.0712108	2.78853	0.00529484	0.0397496	gpch-1
WBGene00022394	1254.78	-0.29454	0.105682	-2.78703	0.00531936	0.0399123	natb-1
WBGene00017993	3312.33	-0.295638	0.106089	-2.78671	0.00532468	0.0399308	cec-5
WBGene00006875	339.964	-0.329352	0.118215	-2.78605	0.00533552	0.0399907	vab-9
WBGene00021636	12371.4	0.235033	0.0843751	2.78557	0.00534341	0.0400284	pcaf-1
WBGene00044666	475.089	-0.412854	0.148274	-2.7844	0.00536267	0.0401512	F33G12.7
WBGene00015418	12611.6	0.264571	0.0950272	2.78416	0.00536671	0.04016	pac-1
WBGene00011832	3625.94	0.257621	0.0925462	2.78371	0.00537417	0.0401923	bgal-1
WBGene00022231	553.799	-0.359264	0.129067	-2.78355	0.00537677	0.0401923	tyr-6
WBGene00012966	544.69	-0.305265	0.109676	-2.78332	0.00538054	0.040199	exos-1
WBGene00006062	359.233	0.389187	0.139901	2.78188	0.00540457	0.040314	stn-1
WBGene00016424	432.569	-0.418106	0.15029	-2.78199	0.00540268	0.040314	C34H4.1
WBGene00018041	225.523	-0.440733	0.158415	-2.78214	0.0054001	0.040314	F35D2.3
WBGene00045357	718.924	-0.32671	0.117506	-2.78036	0.00542992	0.0404816	F13A7.14
WBGene00004980	25353.2	0.25345	0.0912159	2.77857	0.00545989	0.0406616	spk-1
WBGene00219985	2931.29	-0.323675	0.116483	-2.77872	0.00545732	0.0406616	F58D5.13
WBGene00010931	210.587	0.410393	0.147753	2.77755	0.00547699	0.0407639	M162.5
WBGene00018512	12025.7	0.189749	0.0683186	2.77741	0.00547944	0.0407639	trpp-8
WBGene00009921	5275.53	-0.305446	0.110009	-2.77657	0.00549364	0.0408478	F52B5.2
Gene:WBGene00195170	36.964	0.557475	0.200846	2.77564	0.00550934	0.0409428	#N/A
WBGene00044063	550.933	-0.290358	0.10463	-2.77509	0.00551867	0.0409904	bpnt-1
WBGene00019877	7573.37	-0.222867	0.0803188	-2.77478	0.00552385	0.0410071	R05D3.2
WBGene00001600	7602.3	0.185306	0.0668004	2.77402	0.00553675	0.0410673	glh-3
WBGene00004810	107.5	0.432238	0.15582	2.77396	0.00553783	0.0410673	skr-4
WBGene00008505	25842.3	-0.275693	0.0994001	-2.77357	0.0055445	0.0410733	F01G4.6
WBGene00011239	3005.69	-0.285698	0.103004	-2.77365	0.00554313	0.0410733	pges-2
WBGene00013966	233.259	-0.482141	0.173924	-2.77213	0.00556902	0.0412332	ztf-9
WBGene00005014	315.368	-0.409165	0.147681	-2.7706	0.00559527	0.0414056	spt-4
WBGene00000673	3158.02	0.556554	0.200896	2.77035	0.0055996	0.0414158	col-98
WBGene00011604	15085.7	0.205444	0.0741668	2.77002	0.00560529	0.0414244	T08A11.1
WBGene00021130	44.0876	-0.538106	0.194267	-2.76994	0.00560669	0.0414244	W10D9.2
WBGene00022501	1604.01	0.30387	0.109712	2.76969	0.00561088	0.0414335	ZC8.6
WBGene00008577	56.0895	0.557784	0.201407	2.76943	0.00561539	0.0414449	F08G2.5
WBGene00001372	2137.55	0.263331	0.0950939	2.76917	0.00561991	0.0414564	exo-3
WBGene00015814	7162.19	-0.212675	0.0768136	-2.76872	0.00562773	0.0414772	oatr-1
WBGene00019781	176.896	-0.383126	0.138379	-2.76866	0.00562865	0.0414772	M60.6
WBGene00020738	1228.99	-0.320207	0.115701	-2.76754	0.00564807	0.0415984	T23F2.5
WBGene00003225	4095.69	-0.249458	0.0901478	-2.76721	0.00565389	0.0416117	mev-1
WBGene00015950	17.2651	-0.544157	0.196653	-2.7671	0.00565582	0.0416117	C18A11.4
WBGene00002000	31959.1	0.272667	0.0985583	2.76655	0.00566523	0.0416372	hrpr-1
WBGene00006742	745.083	0.324801	0.117399	2.76663	0.00566389	0.0416372	unc-2
WBGene00011527	13141.6	0.31019	0.112153	2.76579	0.0056785	0.0417129	cchl-1
WBGene00002090	16.7956	-0.555644	0.200934	-2.7653	0.00568701	0.0417433	ins-7
WBGene00009726	1420.67	0.317006	0.114641	2.76521	0.00568861	0.0417433	tbc-13
WBGene00012714	8311.89	0.244926	0.0886128	2.764	0.00570973	0.0418764	abce-1
WBGene00012930	2809.87	0.221917	0.0803069	2.76337	0.00572082	0.0419137	obr-1
WBGene00044297	21.2188	0.542246	0.196225	2.76339	0.00572045	0.0419137	C25B8.8
WBGene00010966	9274.4	-0.452842	0.163898	-2.76295	0.00572822	0.041941	nduo-3
WBGene00021200	2337.49	-0.290811	0.105259	-2.76281	0.00573053	0.041941	cyp-31A3
WBGene00013596	6054.43	0.194576	0.0704322	2.7626	0.00573439	0.0419473	nyn-2
WBGene00000931	15978.7	0.230414	0.0834162	2.76222	0.00574095	0.0419734	dao-5
WBGene00012210	497.842	-0.375344	0.135912	-2.76166	0.00575082	0.0420236	W02D9.4
WBGene00195248	367.671	-0.345908	0.125265	-2.76141	0.0057552	0.0420337	emc-5
WBGene00001325	2262.72	0.24406	0.0884018	2.7608	0.00576591	0.04209	eor-2
WBGene00004915	5093.19	0.242702	0.0879295	2.76019	0.00577671	0.0421276	snr-2
WBGene00019762	21411.8	0.198008	0.0717375	2.76017	0.00577708	0.0421276	syf-3
WBGene00001374	194.555	0.360939	0.130784	2.75981	0.00578354	0.0421527	exp-2
WBGene00016797	79.5379	-0.486341	0.176293	-2.75871	0.00580299	0.0422725	C50A2.3
WBGene00012860	1234.36	-0.294218	0.106719	-2.75696	0.00583422	0.0424779	acdh-11
WBGene00001005	11211.8	-0.23802	0.0863516	-2.75641	0.00584397	0.0425267	dlc-1
WBGene00016975	276.851	0.340636	0.12361	2.75574	0.00585604	0.0425924	nhr-173
WBGene00015634	30.7927	0.553899	0.201012	2.75556	0.00585924	0.0425936	C09D4.3
WBGene00008390	484.31	-0.403203	0.146365	-2.75478	0.00587322	0.0426509	D1086.3
WBGene00021075	75.4266	0.466926	0.169494	2.75483	0.00587225	0.0426509	sms-5
WBGene00000800	13920.5	0.233545	0.0847994	2.75409	0.00588562	0.0427188	cars-1
WBGene00003129	759.872	-0.275647	0.100127	-2.75298	0.00590559	0.0427812	map-1
WBGene00006961	19903.2	0.187533	0.0681212	2.75293	0.00590643	0.0427812	xnp-1
WBGene00019797	149.724	-0.421653	0.153152	-2.75317	0.00590221	0.0427812	fbxb-31
WBGene00021978	25.6535	-0.546762	0.198587	-2.75326	0.00590053	0.0427812	Y58A7A.4
WBGene00013220	255.618	0.451878	0.164181	2.75232	0.00591743	0.0428386	ctl-3
WBGene00020719	16862.9	0.17529	0.0636955	2.752	0.00592328	0.0428588	natc-1
WBGene00003111	1636.21	-0.241232	0.0877012	-2.75061	0.00594843	0.0430186	mab-20
WBGene00010425	19597.2	0.223843	0.0813869	2.75035	0.00595311	0.0430211	lpin-1
WBGene00020931	596.01	-0.307383	0.111765	-2.75025	0.00595492	0.0430211	cytb-5.2
WBGene00022735	241.948	-0.415436	0.15112	-2.74904	0.00597692	0.0431577	ZK418.6
WBGene00007309	316.038	0.374198	0.136137	2.74869	0.00598346	0.0431739	C04G2.10
WBGene00012462	1112.41	0.354442	0.128954	2.74858	0.00598534	0.0431739	Y17G7B.8
WBGene00018010	838.313	-0.313716	0.114151	-2.74825	0.00599149	0.0431739	F33E11.2
WBGene00020935	14345.4	0.194658	0.0708278	2.74832	0.00599008	0.0431739	fnci-1
WBGene00010332	69.2727	-0.540705	0.196775	-2.74784	0.00599901	0.0431836	F59D12.5
WBGene00017537	371.687	-0.340414	0.123879	-2.74797	0.00599661	0.0431836	F17A9.5
WBGene00012676	2855.43	0.223646	0.0813975	2.74758	0.00600362	0.0431946	pro-3
WBGene00015357	1880.45	0.293787	0.106935	2.74735	0.00600798	0.0432038	C02F12.8
WBGene00001922	61.1878	-0.520386	0.189439	-2.74698	0.00601467	0.0432297	his-48
WBGene00022277	463.067	-0.345081	0.125764	-2.74388	0.00607177	0.0436177	homt-1
WBGene00008641	4817.25	-0.29608	0.107917	-2.74359	0.00607715	0.0436302	pch-2
WBGene00011609	104.538	0.488907	0.178209	2.74345	0.00607975	0.0436302	T08D2.4
WBGene00003220	9704.39	0.258346	0.0942121	2.74217	0.00610339	0.0436654	mes-2
WBGene00004924	2456.17	0.275249	0.100363	2.74254	0.00609666	0.0436654	snt-4
WBGene00015048	1205.95	0.255154	0.0930519	2.74206	0.00610544	0.0436654	faah-2
WBGene00019579	69.3129	-0.487609	0.1778	-2.74246	0.00609805	0.0436654	oac-57
WBGene00043705	163.852	-0.431869	0.157501	-2.74201	0.00610648	0.0436654	egrh-2
WBGene00045417	22.275	-0.545906	0.199064	-2.74236	0.00609998	0.0436654	Y37H2A.13
WBGene00194906	95.7645	-0.499566	0.182176	-2.74222	0.00610263	0.0436654	Y53C12A.11
WBGene00017889	2399.65	-0.291213	0.106238	-2.74113	0.0061228	0.0437598	F28B3.10
WBGene00010557	18295.2	0.307322	0.112125	2.74088	0.00612751	0.043771	mspn-1
WBGene00009994	1850.48	-0.274703	0.100236	-2.74056	0.0061335	0.0437915	F53F4.12
WBGene00001043	8069.35	0.225683	0.0823567	2.74031	0.00613814	0.0438023	dnj-25
WBGene00000964	1262.33	0.328921	0.120042	2.74006	0.00614278	0.0438131	dhp-2
WBGene00009584	4685.26	-0.195116	0.0712188	-2.73966	0.0061502	0.0438437	drap-1
WBGene00016135	334.541	0.377143	0.137695	2.73897	0.00616318	0.0439138	C26B9.6
WBGene00001790	2466.93	0.291387	0.106406	2.73843	0.00617326	0.0439633	gst-42
WBGene00013893	2306.04	-0.228435	0.0834531	-2.73728	0.00619488	0.0440948	coa-6
WBGene00012554	232.253	-0.403342	0.147411	-2.73618	0.00621572	0.0442207	Y37D8A.16
WBGene00021311	9818.21	0.231482	0.0846087	2.73591	0.00622087	0.0442349	thoc-5
WBGene00009299	348.384	0.365648	0.133721	2.73441	0.00624914	0.0444133	F31E9.6
WBGene00012353	7876.83	0.240037	0.0878224	2.73321	0.0062721	0.0445539	sac-2
WBGene00012019	5509.07	0.254101	0.0929925	2.73249	0.0062858	0.0446285	dkf-2
Gene:WBGene00219636	275.498	0.462963	0.169463	2.73194	0.00629634	0.0446708	#N/A
WBGene00010195	1000.99	-0.303343	0.11104	-2.73184	0.00629814	0.0446708	pot-2
WBGene00010513	11.8438	-0.521589	0.190999	-2.73085	0.00631717	0.0447831	K02E11.4
WBGene00015014	311.317	-0.402229	0.147318	-2.73035	0.00632676	0.0448285	bath-24
WBGene00015515	3294.59	0.271833	0.0995684	2.73011	0.00633129	0.0448378	spdl-1
WBGene00019737	203.117	-0.378059	0.138489	-2.72987	0.00633584	0.0448474	#N/A
WBGene00003619	2719.96	0.2473	0.0906415	2.72833	0.00636554	0.0450264	nhr-20
WBGene00008488	1721.96	-0.248744	0.0911797	-2.72806	0.00637078	0.0450264	F01D4.5
WBGene00010579	622.213	-0.353575	0.129605	-2.72809	0.0063702	0.0450264	K05C4.2
WBGene00010539	1141.41	-0.398149	0.145995	-2.72715	0.00638842	0.0451283	ttr-2
WBGene00013146	169.143	0.49819	0.182717	2.72657	0.00639972	0.0451853	Y53C12B.7
WBGene00011596	109.877	0.495896	0.181918	2.72592	0.0064122	0.0452506	T07G12.5
WBGene00007112	10111.2	0.300589	0.110392	2.72293	0.00647057	0.0456395	B0035.13
WBGene00007686	8484.75	-0.240131	0.0881998	-2.72258	0.00647735	0.0456452	tomm-40
WBGene00018225	169.829	0.50149	0.184198	2.72256	0.0064779	0.0456452	nep-14
WBGene00013459	81.986	-0.512997	0.188545	-2.72083	0.00651191	0.0458592	Y67A10A.10
WBGene00023418	1195.8	-0.319478	0.117426	-2.72068	0.00651482	0.0458592	R06F6.12
WBGene00022194	370.188	-0.430658	0.158315	-2.72026	0.00652297	0.0458705	Y71H2B.4
WBGene00044321	4356	-0.237094	0.0871568	-2.72031	0.00652201	0.0458705	mrps-30
WBGene00018976	108.023	0.460433	0.169286	2.71986	0.00653095	0.0459035	daam-1
WBGene00003687	19343.5	0.30097	0.110678	2.71934	0.00654133	0.0459073	nhr-97
WBGene00009730	284.201	0.376626	0.138484	2.71963	0.00653553	0.0459073	myo-6
WBGene00019472	67.1828	0.500272	0.183968	2.71934	0.00654131	0.0459073	cyp-35B1
WBGene00006702	3228.99	-0.239776	0.0881827	-2.71908	0.00654633	0.0459194	ubc-3
WBGene00008774	9527.42	-0.253071	0.0930991	-2.71829	0.00656195	0.046006	F13H10.3
WBGene00000388	3102.62	-0.284442	0.104658	-2.71783	0.00657121	0.0460478	cdc-25.3
WBGene00013633	516.633	0.290501	0.106922	2.71695	0.00658863	0.0461468	Y105C5A.8
[truncated: 44,748 more rows]

## Sheet: Hypodermal DAF-2(-) upregulated
WormBase ID	baseMean	log2FoldChange	lfcSE	stat	pvalue	padj		public name	Automated Description	Expression Cluster Summary
WBGene00001387	2242.61	3.35886	0.124531	26.9722	3.13e-160	4.39e-156	155.358	far-3	Predicted to enable lipid binding activity. Expressed in vulva and in male.	Enriched in cephalic sheath cell, dopaminergic neuron, hypodermis, ALM, PLM, AFD, male-specific anatomical entity and intestine according to tiling array, microarray and RNA-seq. Affected by daf-12, daf-2, cyc-1, ung-1, ets-4, sam-10, lin-35, oatr-1, daf-16, nhr-8, pgrn-1, let-7, gld-1, lem-2, emr-1, blmp-1, prg-1, fbf-1, puf-8, gld-2, clk-1, wrn-1, tdp-1, glp-1, swsn-2.2, rsks-1, npr-1, jmjd-1.2…
WBGene00000613	97.6905	2.38934	0.198996	12.0069	3.27e-33	1.14e-29	28.9431	col-36	Predicted to be a structural constituent of cuticle. Predicted to be part of collagen trimer.	Enriched in AVK according to RNA-seq. Affected by cyc-1, cid-1, lin-15B, prg-1, clk-1, daf-2, glp-1, dop-1, hsf-1, dpy-21, hrpr-1, daf-12, daf-16, lin-22, smg-1, nuo-6, drh-3, hmg-3, adr-1, nhl-2, ints-6, zip-3, smn-1, daf-1, daf-3, mut-16, ikb-1, nfki-1, sir-2.1, alg-1 and tax-6 according to microarray and RNA-seq. Affected by cholesterol, lathosterol, Sodium Chloride, Psoralens, allantoin, Siro…
WBGene00004009	85.2974	2.36047	0.188488	12.5232	5.57e-36	3.9e-32	31.4089	pgp-15	Expressed in head neurons and tail neurons.	Affected by dpy-21, glh-4, glh-1, pgl-1, pgl-3, smg-2, skn-1, dpy-7, alg-1, hmg-3, rrf-3, smn-1, alh-6, ngn-1, wdr-23 and eat-2 according to RNA-seq. Affected by Mercuric Chloride, multi-walled carbon nanotube, Sodium Chloride, Rifampin, Psoralens, Sirolimus and resveratrol according to microarray and RNA-seq.
WBGene00010528	106.343	2.08931	0.174299	11.987	4.16e-33	1.16e-29	28.9355	K03D3.2	Enriched in several structures, including cephalic sheath cell\; coelomocyte\; dopaminergic neurons\; mechanosensory neurons\; and ventral nerve cord based on tiling array and RNA-seq studies. Is affected by several genes including daf-16\; daf-2\; and daf-12 based on microarray and RNA-seq studies. Is affected by twenty chemicals including methylmercury hydroxide\; mianserin\; and nanoparticle b…	Enriched in cephalic sheath cell, coelomocyte, dopaminergic neuron, ventral nerve cord, hypodermis, PVD, OLL and somatic gonad precursor according to tiling array and RNA-seq. Affected by cyc-1, rsr-2, emr-1, clk-1, ash-2, daf-2, swsn-2.2, jmjd-1.2, dop-1, rbr-2, elli-1, daf-12, daf-16, dpy-21, emb-4, cox-5B, isp-1, nuo-6, alg-1, hmg-3, hmg-4, eat-2, pry-1, damt-1, atfs-1, efa-6, ptl-1, smn-1, un…
WBGene00004236	272.443	1.74322	0.157258	11.0851	1.48e-28	3.46e-25	24.4609	ptr-22	Involved in molting cycle. Predicted to be located in cytoplasmic vesicle membrane and plasma membrane. Is an ortholog of human PTCHD3 (patched domain containing 3 (gene\/pseudogene)).	Enriched in dopaminergic neuron according to tiling array. Affected by cyc-1, sma-2, sma-4, lin-15B, wdr-23, smg-2, smgl-2, eat-2, blmp-1, prg-1, ubc-9, fbf-1, clk-1, ham-3, swsn-2.2, jmjd-3.1, jmjd-1.2, mir-60, dpy-21, mir-34, daf-16, glh-4, glh-1, pgl-1, pgl-3, lin-22, mir-71, his-3, dpy-7, nhr-49, daf-2, drh-3, egl-9, hmg-3, hmg-4, pry-1, atfs-1, nuo-6, nhl-2, fog-2, nhr-86, rrf-3, hsp-6, mdt-…
WBGene00045096	176.897	1.72133	0.182559	9.42888	4.14e-21	4.46e-18	17.3507	K01A6.7	Enriched in amphid sheath cell and head mesodermal cell based on RNA-seq studies. Is affected by several genes including daf-16\; daf-2\; and eat-2 based on RNA-seq and microarray studies. Is affected by eleven chemicals including Ethanol\; Sodium Chloride\; and allantoin based on RNA-seq and microarray studies.	Enriched in amphid sheath cell and head mesodermal cell according to RNA-seq. Affected by lem-2, emr-1, blmp-1, bar-1, prg-1, clk-1, daf-2, daf-16, jmjd-1.2, mir-34, dpy-7, isp-1, hpl-2, alg-1, spt-16, eat-2, atfs-1, nhl-2, zip-3, aak-1, aak-2, flcn-1, spc-1, unc-70, numr-1, numr-2, sacy-1, ngn-1, set-2, vrk-1, unc-30, daf-18 and csr-1 according to RNA-seq and microarray. Affected by Ethanol, Sod…
WBGene00044471	22.1669	1.64041	0.198597	8.25997	1.46e-16	1.2e-13	12.9208	F56D6.9	Is affected by several genes including daf-16\; daf-2\; and glp-1 based on RNA-seq and microarray studies. Is affected by thirteen chemicals including rotenone\; Tunicamycin\; and indole based on RNA-seq and microarray studies.	Affected by smgl-2, pgrn-1, fbf-1, gld-2, clk-1, daf-2, glp-1, daf-16, dop-1, lin-28, mir-34, daf-12, dpy-21, set-4, glh-4, glh-1, pgl-1, pgl-3, hrde-1, exc-7, mbl-1, emb-4, isp-1, nuo-6, drh-3, hmg-3, hmg-4, spt-16, eat-2, pry-1, efa-6, ptl-1, sek-1, ceh-60, unc-70, nhr-14, wdr-5.1, sacy-1, lsm-1, atp-2, anc-1, cat-2, tdc-1, tph-1 and daf-18 according to microarray and RNA-seq. Affected by roten…
WBGene00017806	143.578	1.5713	0.158225	9.93083	3.06e-23	4.28e-20	19.3686	F26A1.8	Predicted to be located in membrane. Predicted to be integral component of membrane. Expressed in head and tail.	Enriched in intestine, amphid sheath cell and male-specific anatomical entity according to Chronogram analysis, RNA-seq and microarray. Affected by nhr-114, rsr-2, clk-1, daf-2, skn-1, jmjd-1.2, chd-3, let-418, mir-34, elli-1, daf-12, daf-16, lin-22, mir-71, dpy-7, nuo-6, alg-1, pfd-6, nhl-2, ints-4, hsp-6, aak-1, aak-2, numr-1, numr-2, yap-1, nhr-14, mex-1, mex-3, spn-4, wdr-5.1, npr-8, mrps-5, …
WBGene00012176	201.272	1.53779	0.18753	8.20024	2.4e-16	1.87e-13	12.7282	W01C9.2	Enriched in Z1.p\; Z4.a\; male distal tip cell\; mechanosensory neurons\; and somatic gonad precursor based on microarray and RNA-seq studies. Is affected by several genes including daf-16\; daf-2\; and glp-1 based on microarray\; RNA-seq\; and tiling array studies. Is affected by sixteen chemicals including methylmercuric chloride\; rotenone\; and mianserin based on microarray and RNA-seq studie…	Enriched in PVD, OLL, hermaphrodite-specific anatomical entity, gon_male_dtc posterior, gon_male_dtc anterior, Z1.p, Z4.a, Z4 and Z1 according to microarray and RNA-seq. Affected by cyc-1, nhr-114, smg-2, smgl-1, smgl-2, csr-1, prg-1, fbf-1, clk-1, wrn-1, daf-2, ham-3, jmjd-1.2, dop-1, hsf-1, rbr-2, glp-1, mes-2, mes-6, mir-34, daf-12, daf-16, dpy-21, set-4, glh-4, glh-1, pgl-1, pgl-3, morc-1, em…
WBGene00019021	45.1953	1.52483	0.199897	7.62808	2.38e-14	1.52e-11	10.8182	F57H12.6	Enriched in hypodermis\; intestine\; male-specific anatomical entity\; and sensory neurons based on microarray\; tiling array\; and RNA-seq studies. Is affected by several genes including daf-16\; daf-2\; and glp-1 based on proteomic\; microarray\; RNA-seq\; and studies. Is affected by twenty-eight chemicals including Nitric Oxide\; methylmercury hydroxide\; and 1-methylnicotinamide based on RNA-…	Enriched in PVD, OLL, hypodermis, intestine, sensory neuron and male-specific anatomical entity according to microarray, tiling array and RNA-seq. Affected by daf-2, cyc-1, nhr-49, rsr-2, smg-2, smgl-1, smgl-2, let-7, gld-1, lem-2, emr-1, blmp-1, csr-1, bar-1, hlh-30, prg-1, ubc-9, clk-1, tdp-1, glp-1, ham-3, swsn-2.2, tcer-1, npr-1, cox-5B, hsf-1, rbr-2, lin-28, daf-16, dpy-21, mir-34, elli-1, d…
WBGene00011042	33.0128	1.41116	0.200572	7.03569	1.98e-12	8.96e-10	9.04769	R05H10.1	Predicted to enable N-acetyltransferase activity.	Enriched in coelomocyte, hypodermis, male and sensory neuron according to tiling array, RNA-seq and proteomic study. Affected by cyc-1, sma-2, sma-4, wdr-23, rsr-2, smgl-1, smgl-2, eat-2, tatn-1, blmp-1, clk-1, wrn-1, tdp-1, daf-2, glp-1, npr-1, rbr-2, mir-60, daf-16, dpy-21, hlh-30, mir-34, glh-4, glh-1, pgl-1, pgl-3, mir-35, alg-1, alg-2, emb-4, smg-2, cox-5B, his-3, dpy-7, nhr-49, hpl-2, hmg-4…
WBGene00004155	186.896	1.37628	0.155271	8.86372	7.74e-19	7.74e-16	15.1113	pqn-73	Predicted to be located in membrane. Predicted to be integral component of membrane. Expressed in arcade cell.	Enriched in pharynx, Z4, Z1 and I1 neuron according to microarray and RNA-seq. Affected by lin-15B, smg-2, smgl-1, ubc-9, fbf-1, csr-1, daf-2, skn-1, npr-1, cox-5B, jmjd-3.1, jmjd-1.2, dop-1, mes-2, mes-6, mir-60, chd-3, let-418, skr-2, skr-1, mir-34, daf-12, daf-16, dpy-21, glh-4, glh-1, pgl-1, pgl-3, hrde-1, dpy-7, clk-1, nuo-6, hpl-2, hmg-3, spt-16, eat-2, pmt-2, pry-1, atfs-1, nhl-2, fog-2, r…
WBGene00021797	78.6843	1.28261	0.196053	6.54217	6.06e-11	2.02e-08	7.69465	plep-1	Predicted to be located in membrane. Predicted to be integral component of membrane. Is an ortholog of human MFSD11 (major facilitator superfamily domain containing 11).	Enriched in excretory cell according to tiling array. Affected by smgl-1, ced-3, emr-1, wdr-5.1, daf-2, swsn-2.2, hyl-2, hsf-1, mir-34, mafr-1, daf-16, hrde-1, sma-4, lin-22, mir-71, ins-11, isp-1, nuo-6, set-26, hpl-2, egl-9, eat-2, atfs-1, nhl-2, fog-2, efa-6, hda-6, rrf-3, hsb-1, aak-1, aak-2, his-72, ints-4, numr-1, numr-2, mex-1, spn-4, sin-3, skn-1, mrps-5, daf-1, daf-3, olrn-1, mut-16, sim…
WBGene00017331	934.354	1.26683	0.125557	10.0897	6.14e-24	9.54e-21	20.0205	ugt-40	Predicted to enable glucuronosyltransferase activity. Predicted to be located in intracellular membrane-bounded organelle. Human ortholog(s) of this gene implicated in several diseases, including Crigler-Najjar syndrome\; Gilbert syndrome\; and female reproductive organ cancer (multiple). Is an ortholog of several human genes including UGT1A10 (UDP glucuronosyltransferase family 1 member A10)\; U…	Affected by cyc-1, rsr-2, tatn-1, clk-1, daf-2, dop-1, dpy-21, mir-34, daf-12, daf-16, glh-4, glh-1, pgl-1, pgl-3, sma-4, lin-22, mir-71, cox-5B, isp-1, nuo-6, alg-1, hmg-3, adr-1, eat-2, pry-1, pfd-6, damt-1, atfs-1, nhr-86, rrf-3, atf-7, pmk-1, aak-1, aak-2, ints-4, numr-1, numr-2, mex-3, cfp-1, set-2, sin-3, mrps-5, rnp-6, ikb-1, nath-10, pie-1, nhr-49, alh-4, daf-18, csr-1 and daf-19 accordin…
WBGene00009487	17.4092	1.25146	0.197708	6.32988	2.45e-10	7.01e-08	7.15428	clec-232	Predicted to enable carbohydrate binding activity.	Enriched in DA neuron, VA neuron, body wall muscle cell and male according to tiling array and RNA-seq. Affected by nhr-114, smgl-2, csr-1, clk-1, npr-1, hsf-1, dpy-21, emb-4, mir-71, smo-1, hmg-3, adr-1, eat-2, daf-2, nhl-2, rrf-3, unc-70, raga-1, lin-29, nas-38, cat-2, tbh-1, tph-1 and mir-243 according to microarray, RNA-seq and proteomic study. Affected by D-glucose, Zidovudine, Psoralens, al…
WBGene00044201	279.274	1.20083	0.184288	6.51608	7.22e-11	2.27e-08	7.64397	H39E23.3	Predicted to enable microtubule binding activity.	Enriched in dopaminergic neuron according to tiling array. Affected by hpl-2, rsr-2, smgl-1, prg-1, puf-8, clk-1, daf-2, glp-1, daf-16, hsf-1, dpy-21, mir-34, hrpr-1, daf-12, glh-4, glh-1, pgl-1, pgl-3, lin-22, smg-1, mir-71, skn-1, dpy-7, isp-1, drh-3, cav-1, hmg-3, spt-16, adr-1, eat-2, pfd-6, ints-6, sek-1, smn-1, wdr-5.1, sftb-1, xbp-1, daf-1, lsm-1, srbc-48, atp-2, ikb-1, unc-30, nhr-49, daf…
WBGene00000756	12.4934	1.17306	0.186674	6.28402	3.3e-10	9.24e-08	7.03433	col-183	Predicted to be a structural constituent of cuticle. Predicted to be located in membrane. Predicted to be integral component of membrane. Expressed in hypodermis.	Enriched in AVK according to RNA-seq. Affected by cyc-1, age-1, prg-1, clk-1, wrn-1, daf-2, dop-1, hsf-1, lin-28, mir-34, daf-12, daf-16, dpy-21, glh-4, glh-1, pgl-1, pgl-3, emb-4, mir-71, nuo-6, hpl-2, alg-1, cav-1, hmg-3, adr-1, eat-2, nhl-2, zip-3, sek-1, smn-1, wdr-5.1, set-6, baz-2, ikb-1, nfki-1, nas-38, nhr-49, sir-2.1, mir-243, tax-6 and nhr-25 according to microarray and RNA-seq. Affecte…
WBGene00008519	113.018	1.17242	0.164989	7.10607	1.19e-12	5.57e-10	9.25414	cyp-13B1	Predicted to enable heme binding activity\; iron ion binding activity\; and oxidoreductase activity. Human ortholog(s) of this gene implicated in several diseases, including Ghosal hematodiaphyseal syndrome\; familial Mediterranean fever\; and leukemia (multiple). Is an ortholog of several human genes including CYP3A4 (cytochrome P450 family 3 subfamily A member 4)\; CYP3A43 (cytochrome P450 fami…	Enriched in PVD, OLL, dopaminergic neuron, hypodermis, intestine and pharyngeal muscle cell according to microarray and tiling array. Affected by daf-16, cyc-1, nhr-114, prp-8, rsr-2, smgl-1, emr-1, lem-2, blmp-1, prg-1, tdp-1, daf-2, swsn-2.2, npr-1, jmjd-1.2, mir-60, chd-3, let-418, dpy-21, mir-34, glh-4, glh-1, pgl-1, pgl-3, morc-1, alg-1, alg-2, emb-4, sma-2, mir-71, cox-5B, smo-1, clk-1, isp…
WBGene00017678	788.308	1.13303	0.200848	5.64122	1.69e-08	2.91e-06	5.53611	asp-12	Predicted to enable aspartic-type endopeptidase activity. Involved in innate immune response. Predicted to be located in lysosome. Is an ortholog of several human genes including CTSE (cathepsin E)\; PGA4 (pepsinogen A4)\; and PGC (progastricsin).	Enriched in intestine according to tiling array, RNA-seq and microarray. Affected by cyc-1, ets-4, sma-2, sma-4, lin-15B, nhr-49, hcf-1, wdr-23, nhr-8, eat-2, emr-1, bar-1, ZK1236.1, prg-1, clk-1, wrn-1, glh-4, glh-1, pgl-1, pgl-3, daf-2, glp-1, mdt-15, hrde-1, rsks-1, jmjd-3.1, jmjd-1.2, hsf-1, rbr-2, chd-3, let-418, cec-4, flp-6, dpy-21, daf-12, daf-16, alg-1, emb-4, sta-1, his-3, elt-7, elt-2,…
WBGene00001477	2441.57	1.12776	0.197862	5.69974	1.2e-08	2.18e-06	5.66154	fmo-2	Predicted to enable monooxygenase activity. Located in cytoplasm. Expressed in excretory gland cell\; intestinal cell\; intestine\; and neurons. Is an ortholog of human FMO5 (flavin containing dimethylaniline monoxygenase 5).	Enriched in intestine, amphid sheath cell and RID according to RNA-seq. Affected by vhl-1, cyc-1, wdr-23, smgl-1, drh-3, hlh-30, fbf-1, clk-1, elt-2, wrn-1, tdp-1, swsn-2.2, npr-1, jmjd-3.1, jmjd-1.2, hsf-1, chd-3, let-418, lmn-1, daf-16, dpy-21, mir-34, unc-39, hrpr-1, dep-1, daf-12, glh-4, glh-1, pgl-1, pgl-3, morc-1, emb-4, sta-1, sma-2, sma-4, mir-71, cox-5B, his-3, dpy-7, nhr-49, daf-2, isp-…
WBGene00219950	1522.57	1.09215	0.145289	7.51708	5.6e-14	3.32e-11	10.4789	F46A8.13	Enriched in neurons based on RNA-seq and microarray studies. Is affected by several genes including rrf-3\; hsf-1\; and sir-2.1 based on RNA-seq and microarray studies. Is affected by eleven chemicals including Tunicamycin\; bisphenol S\; and glycine based on RNA-seq and microarray studies.	Enriched in ADF, AFD, AIB, AIN, AIY, AIZ, ASEL, ASER, ASG, ASI, ASK, AWB, AWC-OFF, AWC-ON, BAG, I6 neuron, M5 neuron, PHB, RIC, RIG, RIV, RMH, VB2, DD neuron, VD neuron and neuron according to RNA-seq and microarray. Affected by prg-1, cep-1, hsf-1, cox-5B, adr-1, atfs-1, nuo-6, rrf-3, kri-1, sftb-1, mrps-5, set-2, bcat-1, prx-5, unc-30, sir-2.1, aak-2, tax-6, hlh-29, tbx-2 and hlh-25 according t…
WBGene00019744	3199.11	1.08734	0.129074	8.42411	3.64e-17	3.18e-14	13.4976	M02H5.8	Enriched in AFD\; head mesodermal cell\; intestine\; pharyngeal muscle cell\; and rectal gland cell based on tiling array\; RNA-seq\; and microarray studies. Is affected by several genes including daf-16\; daf-2\; and glp-1 based on microarray\; RNA-seq\; proteomic\; and tiling array studies. Is affected by twenty-two chemicals including 1-methylnicotinamide\; methylmercuric chloride\; and mianse…	Enriched in intestine, pharyngeal muscle cell, AFD, head mesodermal cell and rectal gland cell according to tiling array, RNA-seq and microarray. Affected by cid-1, aak-2, lin-15B, atx-3, hpl-2, smg-2, nhr-8, ZK1236.1, wrn-1, lin-35, glp-1, fshr-1, swsn-2.2, rsks-1, daf-2, elt-2, npr-1, jmjd-3.1, hyl-2, hsf-1, rbr-2, chd-3, let-418, daf-16, skn-1, cox-5B, mir-34, glh-4, glh-1, pgl-1, pgl-3, mir-3…
WBGene00018601	22.7073	1.07436	0.20138	5.33496	9.56e-08	1.22e-05	4.91364	F48C1.9	Enriched in hypodermis based on tiling array studies. Is affected by several genes including daf-16\; daf-2\; and glp-1 based on microarray\; RNA-seq\; and studies. Is affected by twenty-one chemicals including 1-methylnicotinamide\; methylmercuric chloride\; and rotenone based on RNA-seq and microarray studies.	Enriched in hypodermis according to tiling array. Affected by cyc-1, lin-35, age-1, daf-16, wdr-23, smgl-2, prg-1, ubc-9, fbf-1, puf-8, daf-2, glp-1, npr-1, lin-28, dpy-21, mir-34, glh-4, glh-1, pgl-1, pgl-3, hrde-1, emb-4, smg-1, mir-71, dpy-7, nhr-49, drh-3, alg-1, cav-1, egl-9, hmg-3, eat-2, pmt-2, pfd-6, nhl-2, efa-6, hda-6, pmk-1, sek-1, ceh-60, spc-1, unc-70, numr-1, numr-2, skn-1, npr-8, s…
WBGene00007929	39.872	1.02651	0.198894	5.16111	2.45e-07	2.58e-05	4.58838	dmd-10	Predicted to enable DNA-binding transcription factor activity, RNA polymerase II-specific and RNA polymerase II cis-regulatory region sequence-specific DNA binding activity. Involved in mechanosensory behavior and response to osmotic stress. Predicted to be located in nucleus. Expressed in several structures, including AVG\; body wall musculature\; head neurons\; intestine\; and vulval muscle. Is…	Enriched in coelomocyte, dopaminergic neuron, pharynx, neuron, AFD, ASER, sensory neuron and ALN according to tiling array, RNA-seq and microarray. Affected by cyc-1, daf-16, rsr-2, drh-3, prg-1, wrn-1, csr-1, daf-2, hsf-1, ifg-1, chd-3, let-418, mir-34, daf-12, dpy-21, glh-4, glh-1, pgl-1, pgl-3, emb-4, lin-22, mir-71, nuo-6, hpl-2, hmg-3, adr-1, eat-2, pmt-2, zip-3, smn-1, unc-70, egl-43, set-2…
WBGene00017673	19.7713	1.02346	0.185018	5.53172	3.17e-08	4.83e-06	5.31605	icmt-1	Predicted to enable protein C-terminal S-isoprenylcysteine carboxyl O-methyltransferase activity. Predicted to be involved in C-terminal protein methylation. Predicted to be located in endoplasmic reticulum. Is an ortholog of human ICMT (isoprenylcysteine carboxyl methyltransferase).	Enriched in germ line, male, ASER and ASEL according to RNA-seq. Affected by cyc-1, ung-1, age-1, nhr-114, wdr-23, prp-8, smgl-1, eat-2, nhr-62, lem-2, emr-1, blmp-1, gld-2, gld-4, daf-2, csr-1, glh-4, glh-1, pgl-1, pgl-3, fog-3, hpk-1, npr-1, cox-5B, hsf-1, glp-1, mes-6, dpy-21, mir-34, mafr-1, daf-16, morc-1, sma-2, sma-4, lin-22, mir-71, elt-7, elt-2, isp-1, pmt-2, fbf-2, fbf-1, damt-1, atfs-1…
WBGene00012521	40.0212	1.00356	0.20137	4.98367	6.24e-07	5.31e-05	4.27491	Y32B12B.1	Predicted to be located in membrane. Predicted to be integral component of membrane.	Enriched in DA neuron, VA neuron and hypodermis according to tiling array. Affected by nhr-114, clk-1, mir-34, hmg-3, eat-2, daf-2, pfd-6, ints-5, spn-4, wdr-5.1, cat-2, tdc-1, tph-1 and mir-243 according to microarray and RNA-seq. Affected by methylmercuric chloride, Zidovudine, allantoin, Sirolimus, Rifampin, paraquat, resveratrol and Colistin according to microarray and RNA-seq.
WBGene00001500	95.9791	0.991422	0.189387	5.23489	1.65e-07	1.92e-05	4.7167	ftn-1	Enables identical protein binding activity. Involved in cellular iron ion homeostasis. Predicted to be located in cytoplasm. Expressed in intestine and pharyngeal-intestinal valve. Human ortholog(s) of this gene implicated in several diseases, including COVID-19\; hemochromatosis type 5\; and hyperferritinemia-cataract syndrome. Is an ortholog of human FTH1 (ferritin heavy chain 1)\; FTHL17 (ferr…	Enriched in dopaminergic neuron, intestine, ASER and head mesodermal cell according to tiling array, RNA-seq, proteomic study and microarray. Affected by zfp-1, cyc-1, ung-1, lin-35, daf-16, wdr-23, smgl-1, eat-2, pgrn-1, tatn-1, bar-1, hlh-30, prg-1, clk-1, wrn-1, daf-2, glp-1, swsn-2.2, elt-2, npr-1, jmjd-3.1, hsf-1, rbr-2, mir-60, chd-3, let-418, mir-34, glh-4, glh-1, pgl-1, pgl-3, mir-35, hrd…
WBGene00012664	4312.34	0.972359	0.140454	6.92297	4.42e-12	1.94e-09	8.7122	Y39B6A.1	Predicted to be located in nucleolus and nucleoplasm.	Enriched in intestine, PVD, OLL, body wall muscle cell, head mesodermal cell and muscle cell according to SAGE analysis, microarray, tiling array and RNA-seq. Affected by cyc-1, isp-1, cid-1, aak-2, lin-15B, nhr-49, daf-16, rsr-2, smgl-1, prg-1, clk-1, wrn-1, tdp-1, daf-2, crtc-1, glh-4, glh-1, pgl-1, pgl-3, tcer-1, elt-2, hyl-2, hsf-1, rbr-2, chd-3, let-418, skn-1, mir-34, daf-12, dpy-21, ash-2,…
WBGene00018707	86.8279	0.964358	0.201277	4.79119	1.66e-06	0.00011435	3.94176	oac-31	Predicted to enable acyltransferase activity, transferring groups other than amino-acyl groups. Predicted to be located in membrane. Predicted to be integral component of membrane.	Enriched in intestine and head mesodermal cell according to RNA-seq and microarray. Affected by cyc-1, wdr-23, smg-2, bar-1, tdp-1, daf-2, fshr-1, ham-3, npr-1, jmjd-3.1, jmjd-1.2, dop-1, hyl-2, hsf-1, mir-60, dpy-21, mys-1, mir-34, glh-4, glh-1, pgl-1, pgl-3, mir-35, alg-1, alg-2, alg-5, exc-7, mbl-1, emb-4, sid-3, sma-2, sma-4, mir-71, ins-11, nuo-6, his-69, his-70, his-72, his-74, his-71, hmg-…
WBGene00007957	1236.76	0.963547	0.133948	7.19343	6.32e-13	3.28e-10	9.48413	C35C5.8	Enriched in dopaminergic neurons\; hypodermis\; and somatic gonad precursor based on tiling array and RNA-seq studies. Is affected by several genes including daf-16\; daf-2\; and skn-1 based on microarray\; RNA-seq\; and studies. Is affected by twenty-one chemicals including rotenone\; Tunicamycin\; and Ethanol based on RNA-seq and microarray studies.	Enriched in dopaminergic neuron, hypodermis and somatic gonad precursor according to tiling array and RNA-seq. Affected by alg-1, rde-4, zfp-1, rheb-1, cyc-1, nhr-114, smgl-1, smgl-2, tatn-1, clk-1, daf-2, tcer-1, npr-1, dop-1, hsf-1, skn-1, dpy-21, daf-12, daf-16, emb-4, sid-3, sma-2, sma-4, his-3, nuo-6, flr-4, adr-2, eat-2, pmt-2, pfd-6, atfs-1, nhl-2, mina-1, sek-1, aak-1, aak-2, nmad-1, spc-…
WBGene00019234	421.2	0.963477	0.119899	8.03575	9.3e-16	6.51e-13	12.1864	ugt-8	Predicted to enable glucuronosyltransferase activity. Predicted to be located in intracellular membrane-bounded organelle. Human ortholog(s) of this gene implicated in several diseases, including Crigler-Najjar syndrome\; Gilbert syndrome\; and female reproductive organ cancer (multiple). Is an ortholog of several human genes including UGT1A10 (UDP glucuronosyltransferase family 1 member A10)\; U…	Enriched in excretory cell, AFD, PLM, hypodermis, intestine and muscle cell according to tiling array, RNA-seq and microarray. Affected by cyc-1, hpl-2, nhr-114, wdr-23, smgl-1, smgl-2, eat-2, tatn-1, bar-1, blmp-1, prg-1, clk-1, daf-2, csr-1, ham-3, swsn-2.2, npr-1, dop-1, hyl-2, hsf-1, rbr-2, dpy-27, skn-1, dpy-21, mir-34, morc-1, alg-1, alg-2, alg-5, sma-4, lin-22, flr-4, pry-1, nhl-2, efa-6, …
WBGene00000749	38.8797	0.957866	0.201146	4.76203	1.92e-06	0.0001248	3.90379	col-176	Predicted to be a structural constituent of cuticle.	Enriched in coelomocyte, ventral nerve cord, hypodermis, PVD, OLL and male-specific anatomical entity according to tiling array and RNA-seq. Affected by zfp-1, cyc-1, lin-35, wdr-23, ahr-1, bar-1, blmp-1, prg-1, ubc-9, clk-1, tdp-1, daf-2, aak-2, crtc-1, glp-1, daf-16, ham-3, swsn-2.2, npr-1, jmjd-1.2, osm-9, dop-1, hsf-1, rbr-2, dpy-21, cox-5B, mir-34, elli-1, daf-12, glh-4, glh-1, pgl-1, pgl-3,…
WBGene00010723	173.95	0.956828	0.173813	5.50493	3.69e-08	5.44e-06	5.2644	cpg-7	Enriched in AIM\; PLM\; and hypodermis based on tiling array and RNA-seq studies. Is affected by several genes including daf-16\; daf-2\; and glp-1 based on RNA-seq\; microarray\; and studies. Is affected by eleven chemicals including D-glucose\; Cadmium Chloride\; and Sodium Chloride based on RNA-seq and microarray studies.	Enriched in hypodermis, AIM and PLM according to tiling array and RNA-seq. Affected by rsr-2, emr-1, lem-2, daf-2, glp-1, ham-3, tcer-1, dop-1, hyl-2, rbr-2, daf-16, skn-1, dpy-21, mir-34, daf-12, vgln-1, alg-5, emb-4, cox-5B, sod-2, cav-1, hmg-3, hmg-4, eat-2, pmt-2, pry-1, atfs-1, nhl-2, rrf-3, sek-1, unc-70, mex-1, mex-3, sin-3, spn-4, npr-8, mrps-5, daf-1, daf-3, wdr-23, mut-16, hira-1, set-2…
WBGene00007097	719.147	0.951006	0.19224	4.94697	7.54e-07	6.1e-05	4.21467	B0024.4	Located in membrane raft.	Enriched in neuron, dopaminergic neuron, intestine, PVD and OLL according to tiling array and RNA-seq. Affected by lin-15B, hpl-2, hcf-1, wdr-23, smg-2, smgl-1, smgl-2, nhr-8, rsks-1, daf-2, lem-2, emr-1, bar-1, hlh-30, prg-1, clk-1, ham-3, hrde-1, hpk-1, elt-2, npr-1, jmjd-1.2, hyl-2, hsf-1, rbr-2, mir-60, lmn-1, lin-28, daf-16, skn-1, skr-2, skr-1, cox-5B, mir-34, hrpr-1, dpy-21, glh-4, glh-1, …
WBGene00016017	187.877	0.949961	0.195827	4.85103	1.23e-06	8.96e-05	4.04769	C23G10.11	Expressed in hypodermal cell.	Enriched in AVK according to RNA-seq. Affected by alg-1, rde-4, zfp-1, rheb-1, rsr-2, smgl-1, smgl-2, clk-1, npr-1, hsf-1, dpy-21, emb-4, sma-2, sma-4, mir-71, his-3, drh-3, eat-2, pmt-2, pfd-6, atf-7, pmk-1, sek-1, spc-1, unc-70, nhr-14, skn-1, wdr-5.1, xbp-1, mrps-5, stt-3, lsm-1, pqm-1, skpo-1, fzo-1, nhr-49, csr-1, sir-2.1, daf-16, ash-2, aak-2, crh-1, tax-6, cdk-4, cyd-1, tdp-1, hpl-1, hpl-2…
WBGene00000111	282.589	0.943198	0.140835	6.6972	2.12e-11	8.26e-09	8.08302	alh-5	Predicted to enable aldehyde dehydrogenase (NAD+) activity. Predicted to be involved in cellular aldehyde metabolic process. Predicted to be located in cytoplasm. Human ortholog(s) of this gene implicated in arteriosclerosis. Is an ortholog of human ALDH3A1 (aldehyde dehydrogenase 3 family member A1).	Enriched in intestine and head mesodermal cell according to tiling array and RNA-seq. Affected by lin-15B, hpl-2, hcf-1, wdr-23, smgl-1, let-7, gld-1, clk-1, wrn-1, daf-2, npr-1, unc-75, dop-1, chd-3, let-418, dpy-21, daf-12, daf-16, glh-4, glh-1, pgl-1, pgl-3, hrde-1, alg-1, sma-2, sma-4, ins-11, isp-1, nuo-6, egl-9, flr-4, pmt-2, pry-1, pfd-6, damt-1, atfs-1, nhl-2, nhr-86, mina-1, ifo-1, ints-…
WBGene00022386	763.185	0.936567	0.114742	8.16236	3.29e-16	2.42e-13	12.6162	Y95B8A.6	Enriched in hypodermis\; muscle cell\; and neurons based on tiling array and microarray studies. Is affected by several genes including daf-16\; daf-2\; and glp-1 based on microarray\; RNA-seq\; and studies. Is affected by sixteen chemicals including rotenone\; Tunicamycin\; and Zidovudine based on RNA-seq and microarray studies.	Enriched in hypodermis, muscle cell and neuron according to tiling array and microarray. Affected by cyc-1, atfs-1, spg-7, smg-2, smgl-2, tatn-1, blmp-1, clk-1, daf-2, jmjd-1.2, dop-1, mir-34, daf-12, daf-16, dpy-21, glh-4, glh-1, pgl-1, pgl-3, alg-2, emb-4, sma-2, sma-4, isp-1, nuo-6, hmg-3, thoc-5, eat-2, rrf-3, ints-5, aak-1, aak-2, nmad-1, ints-4, iff-1, mex-1, mex-3, mrps-5, egl-43, srbc-48,…
WBGene00017336	2381.47	0.932044	0.0944989	9.86302	6.02e-23	7.66e-20	19.1158	ugt-41	Predicted to enable glucuronosyltransferase activity. Predicted to be located in intracellular membrane-bounded organelle. Human ortholog(s) of this gene implicated in several diseases, including Crigler-Najjar syndrome\; Gilbert syndrome\; and female reproductive organ cancer (multiple). Is an ortholog of several human genes including UGT1A10 (UDP glucuronosyltransferase family 1 member A10)\; U…	Enriched in excretory cell, AFD and PLM according to tiling array and RNA-seq. Affected by clk-1, cyc-1, lin-15B, daf-16, prp-8, smg-2, smgl-1, eat-2, pgrn-1, blmp-1, ubc-9, ash-2, daf-2, glp-1, ham-3, rsks-1, npr-1, jmjd-3.1, jmjd-1.2, hyl-2, hsf-1, dpy-27, dpy-21, mir-34, mafr-1, elli-1, glh-4, glh-1, pgl-1, pgl-3, hrde-1, emb-4, sma-2, sma-4, lin-22, elt-2, elt-7, sod-2, set-26, hmg-3, pry-1, …
WBGene00018758	2218.11	0.928418	0.107732	8.61785	6.82e-18	6.37e-15	14.1959	F53E10.1	Predicted to enable catalytic activity\; molybdenum ion binding activity\; and pyridoxal phosphate binding activity. Expressed in head. Is an ortholog of human MTARC1 (mitochondrial amidoxime reducing component 1) and MTARC2 (mitochondrial amidoxime reducing component 2).	Enriched in intestine, PVD, OLL and sensory neuron according to Chronogram analysis, microarray and RNA-seq. Affected by cyc-1, sma-2, sma-4, age-1, nhr-114, wdr-23, smgl-1, let-7, gld-1, lem-2, emr-1, clk-1, daf-2, htz-1, hsf-1, hlh-30, mir-34, glh-4, glh-1, pgl-1, pgl-3, emb-4, smg-2, flr-4, eat-2, damt-1, nhr-86, hsp-6, aak-1, aak-2, spc-1, unc-70, iff-1, mex-3, sin-3, cfp-1, set-2, lin-29, mr…
WBGene00009429	3694.94	0.925587	0.199492	4.63972	3.49e-06	0.00020185	3.69497	irg-5	Involved in defense response to Gram-positive bacterium.	Enriched in pharynx, cephalic sheath cell, ventral nerve cord, intestine, PVD, OLL, DA neuron and VA neuron according to microarray and tiling array. Affected by daf-12, mpk-1, hlh-30, aak-2, daf-16, wdr-23, tatn-1, blmp-1, prg-1, clk-1, daf-2, glh-4, glh-1, pgl-1, pgl-3, fshr-1, ham-3, swsn-2.2, rsks-1, npr-1, jmjd-3.1, dop-1, rbr-2, mir-60, lmn-1, lsm-1, lin-28, skn-1, dpy-21, mys-1, elli-1, se…
WBGene00003092	48.8401	0.921474	0.196622	4.68653	2.78e-06	0.00017064	3.76792	lys-3	Involved in stress response to copper ion.	Enriched in dopaminergic neuron, intestine, head mesodermal cell and muscle cell according to tiling array, RNA-seq and microarray. Affected by zfp-1, cyc-1, lin-15B, wdr-23, smg-2, nhr-8, eat-2, ubc-9, clk-1, wrn-1, daf-2, glp-1, skn-1, swsn-2.2, npr-1, jmjd-1.2, dop-1, hyl-2, hsf-1, lmn-1, daf-16, skr-2, skr-1, dpy-21, mir-34, glh-4, glh-1, pgl-1, pgl-3, mir-35, alg-1, alg-2, alg-5, exc-7, mbl-…
WBGene00005616	110.155	0.921144	0.183283	5.0258	5.01e-07	4.5e-05	4.34679	srj-29	Predicted to be located in membrane. Predicted to be integral component of membrane.	Affected by cyc-1, hpl-2, rsr-2, smgl-1, npr-1, spt-16, flr-4, adr-1, ifo-1, kri-1, nhr-14, nfki-1, plp-1, cat-2, eat-2 and nhr-49 according to microarray, tiling array and RNA-seq. Affected by multi-walled carbon nanotube, stavudine, paraquat, silicon dioxide nanoparticle, resveratrol and nitroguanidine according to RNA-seq and microarray.
WBGene00008803	529.3	0.917629	0.139901	6.55914	5.41e-11	1.94e-08	7.7122	lips-10	Predicted to enable lipase activity. Predicted to be involved in lipid catabolic process.	Enriched in hypodermis, Z4, Z1, somatic gonad precursor and body wall musculature according to tiling array, RNA-seq and microarray. Affected by lin-35, cyc-1, nhr-49, wdr-23, smgl-1, emr-1, lem-2, prg-1, clk-1, daf-16, ham-3, tcer-1, npr-1, jmjd-1.2, chd-3, let-418, mir-34, unc-39, daf-12, glh-4, glh-1, pgl-1, pgl-3, alg-1, alg-2, adr-2, sma-2, sma-4, lin-22, ins-11, his-69, his-70, his-72, his-…
WBGene00018724	86.8191	0.914546	0.182102	5.02216	5.11e-07	4.53e-05	4.3439	F53A9.1	Predicted to be involved in stress response to metal ion.	Enriched in PVD, OLL, dopaminergic neuron, ASER, head mesodermal cell and intestine according to microarray, tiling array and RNA-seq. Affected by hda-1, cyc-1, cid-1, ung-1, aak-2, nhr-114, wdr-23, smg-2, nhr-8, eat-2, htz-1, daf-2, glp-1, skn-1, ham-3, swsn-2.2, npr-1, cox-5B, jmjd-3.1, hyl-2, hsf-1, rbr-2, mir-60, daf-16, skr-2, skr-1, dpy-21, mir-34, mir-35, alg-1, alg-2, alg-5, emb-4, sma-2,…
WBGene00007989	28.3811	0.903644	0.197447	4.57665	4.72e-06	0.00024637	3.60841	fipr-22	Predicted to be involved in innate immune response.	Enriched in excretory cell, GABAergic neuron and hypodermis according to tiling array and RNA-seq. Affected by cyc-1, smg-2, blmp-1, bar-1, hlh-30, prg-1, clk-1, daf-2, daf-16, ham-3, jmjd-1.2, dop-1, hsf-1, daf-12, dpy-21, glh-4, glh-1, pgl-1, pgl-3, hrde-1, exc-7, mbl-1, sma-2, elt-2, elt-7, dpy-7, nhr-49, isp-1, nuo-6, drh-3, set-26, hpl-2, cav-1, egl-9, hmg-3, hmg-4, spt-16, flr-4, eat-2, pry…
WBGene00012591	71.9335	0.902579	0.195715	4.61169	3.99e-06	0.00022364	3.65045	nspe-1	Enriched in PLM based on RNA-seq studies. Is affected by several genes including daf-16\; daf-2\; and dpy-10 based on microarray\; tiling array\; RNA-seq\; and studies. Is affected by thirty-three chemicals including methylmercury hydroxide\; 1-methylnicotinamide\; and rotenone based on RNA-seq and microarray studies. Is predicted to encode a protein with the following domains: Protein of unknown…	Enriched in PLM according to RNA-seq. Affected by clk-1, cyc-1, hpl-2, wdr-23, smg-2, smgl-1, eat-2, bar-1, wrn-1, tdp-1, npr-1, jmjd-3.1, dop-1, dpy-21, mir-34, hrpr-1, daf-16, glh-4, glh-1, pgl-1, pgl-3, alg-1, alg-2, sid-3, sta-1, sma-2, sma-4, lin-22, ins-11, dpy-7, drh-3, his-69, his-70, his-72, his-74, his-71, egl-9, thoc-5, pry-1, daf-2, damt-1, nhl-2, efa-6, mdt-15, zip-3, sek-1, aak-1, a…
WBGene00019233	46.4417	0.891692	0.195038	4.57188	4.83e-06	0.0002479	3.60572	ugt-14	Predicted to enable glucuronosyltransferase activity. Predicted to be located in intracellular membrane-bounded organelle. Human ortholog(s) of this gene implicated in several diseases, including Crigler-Najjar syndrome\; Gilbert syndrome\; and female reproductive organ cancer (multiple). Is an ortholog of several human genes including UGT1A10 (UDP glucuronosyltransferase family 1 member A10)\; U…	Enriched in NSM, AFD and PLM according to tiling array and RNA-seq. Affected by cyc-1, wdr-23, smgl-2, clk-1, daf-2, skn-1, npr-1, hyl-2, chd-3, let-418, dpy-21, mir-34, lin-22, mir-71, cox-5B, nuo-6, egl-9, hmg-3, spt-16, eat-2, damt-1, atfs-1, nhl-2, efa-6, nhr-86, rrf-3, daf-16, hsp-6, mdt-15, sek-1, numr-1, numr-2, ztf-11, mex-3, spn-4, cfp-1, set-2, wdr-5.1, mrps-5, daf-1, daf-3, plp-1, swsn…
WBGene00011158	12.5773	0.888277	0.177727	4.99798	5.79e-07	5.04e-05	4.29757	chil-16	Predicted to enable chitin binding activity. Predicted to be involved in carbohydrate metabolic process. Predicted to be located in membrane. Predicted to be integral component of membrane.	Affected by rsr-2, clk-1, daf-16, dpy-21, daf-12, rrf-3, ints-5, smn-1, spc-1, daf-18, mut-2 and lin-35 according to tiling array, microarray and RNA-seq. Affected by methylmercuric chloride, Sodium Chloride, allantoin, Sirolimus, metformin, Rifampin, stearic acid, sucrose and resveratrol according to microarray and RNA-seq.
WBGene00008842	18.9443	0.882592	0.197653	4.46535	7.99e-06	0.00037013	3.43165	chil-28	Is affected by several genes including daf-16\; daf-2\; and daf-12 based on microarray\; tiling array\; and RNA-seq studies. Is affected by eight chemicals including multi-walled carbon nanotube\; Psoralens\; and allantoin based on RNA-seq and microarray studies.	Affected by cyc-1, ung-1, lin-15B, lin-35, rsr-2, smg-2, smgl-1, smgl-2, daf-2, daf-16, daf-12, dpy-21, sma-2, sma-4, isp-1, nuo-6, drh-3, hpl-2, spt-16, eat-2, pals-22, pals-25, hpx-2, smn-1, ikb-1, tdc-1 and mdt-15 according to microarray, tiling array and RNA-seq. Affected by multi-walled carbon nanotube, Psoralens, allantoin, Sirolimus, metformin, Rifampin, CGP37157, resveratrol and nitroguan…
WBGene00235114	157.149	0.840416	0.174853	4.80641	1.54e-06	0.00010866	3.96393	ZK105.13	Enriched in amphid sheath cell\; arcade cell\; and pharyngeal-intestinal valve cell based on RNA-seq studies. Is affected by several genes including daf-16\; daf-2\; and rrf-3 based on RNA-seq\; \; and microarray studies. Is affected by six chemicals including allantoin\; Sirolimus\; and Psoralens based on RNA-seq and microarray studies. Is predicted to encode a protein with the following domains…	Enriched in amphid sheath cell, arcade cell and pharyngeal-intestinal valve cell according to RNA-seq. Affected by clk-1, daf-2, isp-1, nuo-6, his-69, his-70, his-72, his-74, his-71, atfs-1, rrf-3, aak-1, aak-2, smn-1, unc-70, sftb-1, daf-1, daf-3, ngn-1, pqm-1, ikb-1, fhod-1, nas-38, swsn-1, swsn-9, spr-5, csr-1, daf-16, tdp-1, hpl-1, hpl-2, his-24, daf-10 and tbx-2 according to RNA-seq and micr…
WBGene00007833	474.047	0.838903	0.150886	5.55985	2.7e-08	4.35e-06	5.36151	oac-6	Predicted to enable acyltransferase activity, transferring groups other than amino-acyl groups. Predicted to be located in membrane. Predicted to be integral component of membrane.	Enriched in intestine according to tiling array and RNA-seq. Affected by clk-1, hpl-2, smg-2, daf-16, nhr-8, rsks-1, daf-2, lem-2, emr-1, glh-4, glh-1, pgl-1, pgl-3, skn-1, glp-1, fshr-1, npr-1, cox-5B, hyl-2, hsf-1, rbr-2, chd-3, let-418, cec-4, dpy-21, hrde-1, morc-1, alg-1, alg-2, alg-5, sid-3, sta-1, sma-2, sma-4, lin-22, elt-7, elt-2, nhr-49, his-69, his-70, his-72, his-74, his-71, set-26, e…
WBGene00009488	1221.08	0.836917	0.123288	6.78831	1.13e-11	4.67e-09	8.33068	oac-20	Predicted to enable acyltransferase activity, transferring groups other than amino-acyl groups. Predicted to be located in membrane. Predicted to be integral component of membrane.	Enriched in intestine according to tiling array and RNA-seq. Affected by npr-1, hpl-2, wdr-23, smg-2, smgl-1, daf-16, lem-2, emr-1, wrn-1, tdp-1, daf-2, cox-5B, jmjd-1.2, hyl-2, hsf-1, mir-60, cec-4, dpy-21, mir-34, mafr-1, glh-4, glh-1, pgl-1, pgl-3, hrde-1, morc-1, sid-3, sta-1, sma-2, sma-4, elt-2, nhr-49, isp-1, nuo-6, alg-1, egl-9, flr-4, thoc-5, eat-2, damt-1, atfs-1, nhl-2, pals-22, pals-2…
WBGene00007203	120.576	0.833943	0.168811	4.94011	7.81e-07	6.25e-05	4.20412	best-1	Predicted to enable chloride channel activity. Predicted to be involved in chloride transport. Predicted to be located in plasma membrane. Predicted to be integral component of membrane. Predicted to be part of chloride channel complex. Human ortholog(s) of this gene implicated in autosomal dominant vitreoretinochoroidopathy and retinal degeneration (multiple). Is an ortholog of human BEST1 (best…	Enriched in excretory cell, GABAergic neuron and germline precursor cell according to tiling array. Affected by lin-35, rde-4, zfp-1, rheb-1, cyc-1, sma-2, sma-4, egl-5, smgl-1, smgl-2, blmp-1, clk-1, wrn-1, daf-2, hsf-1, dpy-21, mir-34, daf-12, daf-16, glh-4, glh-1, pgl-1, pgl-3, mir-35, emb-4, his-3, nuo-6, hpl-2, alg-1, eat-2, pmt-2, pry-1, pfd-6, damt-1, atfs-1, nhl-2, mina-1, rrf-3, atf-7, p…
WBGene00022814	93.629	0.831215	0.184231	4.51181	6.43e-06	0.00031465	3.50217	ZK742.4	Predicted to enable FMN binding activity and oxidoreductase activity.	Enriched in sensory neuron according to RNA-seq. Affected by cyc-1, lin-15B, hcf-1, wdr-23, eat-2, bar-1, daf-2, tcer-1, cox-5B, jmjd-3.1, jmjd-1.2, chd-3, let-418, fog-2, sma-2, sma-4, lin-22, elt-7, dpy-7, skn-1, nhr-49, isp-1, nuo-6, adr-2, pry-1, damt-1, nhl-2, daf-16, atf-7, pmk-1, hsp-6, sek-1, aak-1, aak-2, spc-1, unc-70, sin-3, cfp-1, sftb-1, alh-6, mrps-5, srbc-48, set-2, pqm-1, ikb-1, s…
WBGene00015449	2985.65	0.830492	0.12749	6.51419	7.31e-11	2.27e-08	7.64397	ugt-63	Predicted to enable glucuronosyltransferase activity. Predicted to be located in intracellular membrane-bounded organelle. Expressed in hypodermis and muscle cell. Human ortholog(s) of this gene implicated in alcoholic pancreatitis\; cholangiocarcinoma\; and pancreatic cancer. Is an ortholog of several human genes including UGT1A10 (UDP glucuronosyltransferase family 1 member A10)\; UGT1A7 (UDP g…	Enriched in dopaminergic neuron, germ line and body wall musculature according to tiling array, RNA-seq and microarray. Affected by cyc-1, sma-2, sma-4, mab-5, age-1, nhr-114, rsr-2, smgl-1, pgrn-1, blmp-1, wrn-1, ham-3, swsn-2.2, tcer-1, npr-1, jmjd-1.2, dop-1, hyl-2, rbr-2, mir-60, chd-3, skn-1, dpy-21, mir-34, glh-4, glh-1, pgl-1, pgl-3, hrde-1, morc-1, alg-1, alg-2, alg-5, cox-5B, daf-2, sod-…
WBGene00021011	113.25	0.826321	0.189119	4.36933	1.25e-05	0.0005168	3.28668	W03G1.5	Enriched in amphid neurons\; intestine\; and sensory neurons based on RNA-seq and microarray studies. Is affected by several genes including daf-16\; daf-2\; and daf-12 based on RNA-seq\; microarray\; and studies. Is affected by sixteen chemicals including Mercuric Chloride\; Tunicamycin\; and Cadmium Chloride based on microarray and RNA-seq studies. Is predicted to encode a protein with the foll…	Enriched in sensory neuron, ASG, ASJ, AWA, AWC-OFF, AWC-ON and intestine according to RNA-seq and microarray. Affected by daf-2, daf-16, cec-4, dpy-21, mir-34, daf-12, glh-4, glh-1, pgl-1, pgl-3, emb-4, sma-2, sma-4, lin-22, cox-5B, elt-2, elt-7, isp-1, nuo-6, his-69, his-70, his-72, his-74, his-71, alg-1, hmg-4, spt-16, eat-2, pry-1, damt-1, atfs-1, zip-3, aak-1, aak-2, unc-70, ints-4, numr-1, n…
WBGene00012683	105.133	0.821435	0.196497	4.1804	2.91e-05	0.00099246	3.00329	asp-17	Predicted to enable aspartic-type endopeptidase activity. Predicted to be involved in cell death. Predicted to be located in lysosome. Is an ortholog of several human genes including CTSE (cathepsin E)\; PGA4 (pepsinogen A4)\; and PGC (progastricsin).	Enriched in DA neuron, VA neuron, dopaminergic neuron and intestine according to tiling array and RNA-seq. Affected by cyc-1, lin-35, hcf-1, smg-2, smgl-1, nhr-8, daf-2, ubc-9, clk-1, glp-1, mdt-15, cox-5B, jmjd-1.2, dop-1, hyl-2, hsf-1, mir-60, lin-28, dpy-21, mir-34, hrpr-1, mafr-1, daf-16, set-4, glh-4, glh-1, pgl-1, pgl-3, hrde-1, alg-2, emb-4, sid-3, sta-1, sma-2, sma-4, lin-22, smg-1, mir-7…
WBGene00020394	91.0479	0.818155	0.171289	4.77646	1.78e-06	0.00011895	3.92464	T10B5.8	Predicted to enable FMN binding activity and oxidoreductase activity.	Affected by cyc-1, smg-2, smgl-1, smgl-2, lem-2, emr-1, clk-1, daf-2, daf-16, ham-3, npr-1, cox-5B, jmjd-3.1, jmjd-1.2, dop-1, hrpr-1, elli-1, glh-4, glh-1, pgl-1, pgl-3, hrde-1, fog-2, sta-1, sma-2, lin-22, mir-71, ins-11, alg-1, hmg-3, adr-2, pry-1, damt-1, atfs-1, nuo-6, nhl-2, pals-25, numr-1, numr-2, iff-1, mex-3, spn-4, set-2, skn-1, wdr-5.1, alh-6, mrps-5, sacy-1, set-6, baz-2, daf-3, isp-…
WBGene00011330	3551.26	0.812354	0.180836	4.49221	7.05e-06	0.00033568	3.47407	T01D3.6	Predicted to enable calcium ion binding activity and serine-type endopeptidase inhibitor activity. Predicted to be involved in negative regulation of endopeptidase activity. Predicted to be located in extracellular matrix and extracellular space. Is an ortholog of human FCGBP (Fc gamma binding protein).	Enriched in intestine, pharyngeal muscle cell and head mesodermal cell according to SAGE analysis, tiling array, RNA-seq and microarray. Affected by daf-12, daf-16, alg-1, lin-15B, lec-6, nhr-49, atfs-1, spg-7, smg-2, let-7, gld-1, tatn-1, wrn-1, elt-2, daf-2, glp-1, fshr-1, mdt-15, swsn-2.2, rsks-1, npr-1, jmjd-3.1, jmjd-1.2, hyl-2, hsf-1, chd-3, let-418, skn-1, mir-34, mafr-1, glh-4, glh-1, pgl…
WBGene00017838	120.366	0.802219	0.182271	4.40125	1.08e-05	0.00046367	3.33379	F26G1.2	Enriched in germline precursor cell\; hypodermis\; neurons\; and somatic gonad precursor based on tiling array\; RNA-seq\; and proteomic studies. Is affected by several genes including daf-16\; daf-2\; and rrf-3 based on microarray\; RNA-seq\; and studies. Is affected by seventeen chemicals including rotenone\; Tunicamycin\; and 4-bromodiphenyl ether based on RNA-seq and microarray studies.	Enriched in dopaminergic neuron, germline precursor cell, hypodermis, somatic gonad precursor, sensory neuron and ASK according to tiling array, RNA-seq and proteomic study. Affected by hda-1, zfp-1, sam-10, daf-16, wdr-23, eat-2, blmp-1, bar-1, fbf-1, clk-1, wrn-1, daf-2, chd-3, dpy-21, mir-34, glh-4, glh-1, pgl-1, pgl-3, mir-35, emb-4, sma-2, sma-4, hmg-3, spt-16, pmt-2, pry-1, pfd-6, atfs-1, n…
WBGene00007932	916.799	0.800979	0.122227	6.55323	5.63e-11	1.95e-08	7.70997	zip-5	Predicted to enable DNA-binding transcription activator activity, RNA polymerase II-specific and RNA polymerase II transcription regulatory region sequence-specific DNA binding activity. Predicted to be involved in regulation of transcription by RNA polymerase II. Predicted to be located in nucleus. Expressed in head muscle\; head neurons\; tail neurons\; and ventral nerve cord.	Enriched in germ line, intestine, head mesodermal cell and sensory neuron according to RNA-seq and microarray. Affected by unc-120, atfs-1, spg-7, wdr-23, smg-2, smgl-1, nhr-8, lem-2, emr-1, csr-1, prg-1, ubc-9, ash-2, wdr-5.1, glp-1, skn-1, mdt-15, daf-16, swsn-2.2, npr-1, cox-5B, jmjd-3.1, hsf-1, mir-60, chd-3, let-418, dpy-21, glh-4, glh-1, pgl-1, pgl-3, morc-1, alg-1, alg-2, alg-5, emb-4, sta…
WBGene00020007	1235.08	0.800935	0.104057	7.69711	1.39e-14	9.28e-12	11.0325	R11F4.1	Predicted to enable glycerol kinase activity. Predicted to be involved in several processes, including glycerol metabolic process\; glycerol-3-phosphate biosynthetic process\; and triglyceride metabolic process. Predicted to be located in mitochondrion. Human ortholog(s) of this gene implicated in glycerol kinase deficiency. Is an ortholog of human GK (glycerol kinase) and GK2 (glycerol kinase 2).	Enriched in body wall musculature, vulval muscle, ventral nerve cord, nerve ring, dorsal nerve cord, somatic neuron, tail neuron, germline precursor cell, hypodermis, intestine and pharyngeal muscle cell according to Chronogram analysis, tiling array and proteomic study. Affected by alg-1, rde-4, zfp-1, prp-8, blmp-1, bar-1, rsd-2, wrn-1, daf-2, glp-1, ham-3, swsn-2.2, mir-34, daf-12, daf-16, dpy…
WBGene00017332	69.9942	0.800749	0.19226	4.16494	3.11e-05	0.00103821	2.98371	ugt-37	Predicted to enable glucuronosyltransferase activity. Predicted to be located in intracellular membrane-bounded organelle. Human ortholog(s) of this gene implicated in several diseases, including Crigler-Najjar syndrome\; Gilbert syndrome\; and female reproductive organ cancer (multiple). Is an ortholog of several human genes including UGT1A10 (UDP glucuronosyltransferase family 1 member A10)\; U…	Enriched in AFD and ASER according to RNA-seq. Affected by rsr-2, smg-2, smgl-1, clk-1, csr-1, npr-1, jmjd-1.2, dpy-21, mir-34, daf-16, set-4, glh-4, glh-1, pgl-1, pgl-3, hrde-1, adr-2, lin-22, elt-2, his-69, his-70, his-72, his-74, his-71, spt-16, thoc-5, eat-2, pry-1, atfs-1, atf-7, mdt-15, spc-1, unc-70, ints-4, raga-1, mex-1, spn-4, cfp-1, set-2, sin-3, skn-1, mrps-5, rnp-6, nfki-1, met-2, sp…
WBGene00003331	58.9138	0.787813	0.179237	4.39537	1.11e-05	0.00047203	3.32603	mir-238	Is affected by several genes including eat-2\; glp-4\; and alg-1 based on RNA-seq studies. Is affected by silicon dioxide nanoparticle based on microarray studies. Used to study Parkinson's disease.	Affected by prg-1, eat-2, glp-4, alg-1, alg-2, alg-5, smg-2, mir-71, ints-4, meg-3, meg-4, hrpk-1, mrps-5 and nfki-1 according to RNA-seq. Affected by silicon dioxide nanoparticle according to microarray.
WBGene00009988	241.618	0.785963	0.128415	6.12048	9.33e-10	2.33e-07	6.63264	F53F4.4	Is affected by several genes including daf-16\; daf-2\; and daf-12 based on RNA-seq and microarray studies. Is affected by ten chemicals including methylmercuric chloride\; Psoralens\; and allantoin based on microarray and RNA-seq studies.	Affected by smgl-1, prg-1, wrn-1, hsf-1, unc-39, daf-12, daf-16, dpy-21, emb-4, sma-2, ins-11, daf-2, thoc-5, adr-1, atfs-1, hsp-6, his-72, iff-1, wdr-5.1, sftb-1, mut-16, hda-1, lin-14, lin-4, mir-243, isp-1 and nuo-6 according to microarray and RNA-seq. Affected by methylmercuric chloride, Psoralens, allantoin, Sirolimus, metformin, Rifampin, paraquat, single-walled carbon nanotube, dafa#1 and …
WBGene00018268	107.49	0.78314	0.198855	3.93825	8.21e-05	0.00210472	2.67681	F41C3.2	Predicted to enable transmembrane transporter activity. Predicted to be involved in transmembrane transport. Predicted to be located in membrane. Predicted to be integral component of membrane. Expressed in body wall musculature and uterine muscle.	Enriched in germline precursor cell, RID and hypodermis according to tiling array, RNA-seq and proteomic study. Affected by hlh-30, daf-16, hpl-2, pgrn-1, lem-2, emr-1, wrn-1, daf-2, hpk-1, jmjd-1.2, hsf-1, rbr-2, unc-39, glh-4, glh-1, pgl-1, pgl-3, mir-35, hrde-1, alg-1, alg-2, sma-2, sma-4, adr-2, eat-2, pry-1, nhl-2, rrf-3, ints-1, hsp-6, aak-1, aak-2, flcn-1, nmad-1, mdt-15, mex-3, sin-3, daf…
WBGene00007397	68.0275	0.779727	0.196027	3.97764	6.96e-05	0.00188492	2.72471	C07A4.2	Predicted to be located in extracellular space.	Enriched in hypodermis and sensory neuron according to tiling array and RNA-seq. Affected by alg-1, zfp-1, age-1, sma-2, sma-4, nhr-114, smgl-1, smgl-2, glp-1, daf-2, ham-3, hsf-1, chd-3, let-418, dpy-21, mir-34, daf-12, daf-16, glh-4, glh-1, pgl-1, pgl-3, hrde-1, fog-2, emb-4, smg-2, mir-71, set-26, egl-9, flr-4, eat-2, atfs-1, nuo-6, nhl-2, rrf-3, hsp-6, rpl-33, rpl-5, sek-1, sin-3, daf-1, daf-…
WBGene00023263	94.7517	0.77501	0.168828	4.59053	4.42e-06	0.00023455	3.62976	D1005.t1	Enriched in somatic gonad precursor based on RNA-seq studies. Is affected by several genes including eat-2\; tph-1\; and sek-1 based on RNA-seq studies. Is affected by Rifampin\; allantoin\; and Sirolimus based on RNA-seq studies.	Enriched in somatic gonad precursor according to RNA-seq. Affected by chd-3, let-418, ash-2, cox-5B, isp-1, egl-9, hmg-3, eat-2, atfs-1, nuo-6, sek-1, smn-1, ints-4, wdr-5.1, stt-3, hira-1, swsn-1, cat-2, tdc-1, tph-1 and unc-30 according to RNA-seq. Affected by Rifampin, allantoin and Sirolimus according to RNA-seq.
WBGene00014030	11426.2	0.762923	0.137886	5.53301	3.15e-08	4.83e-06	5.31605	glb-1	Predicted to enable several functions, including heme binding activity\; oxygen binding activity\; and oxygen carrier activity. Predicted to be involved in oxygen transport. Predicted to be located in cytoplasm. Expressed in VC neuron\; germ line\; head muscle\; head neurons\; and tail neurons.	Enriched in cephalic sheath cell, head mesodermal cell, sensory neuron, AQR, ASK, AVG, AWB, PQR, intestine and muscle cell according to tiling array, RNA-seq and microarray. Affected by daf-2, clk-1, cyc-1, daf-16, mab-5, aak-2, age-1, atx-3, K10D11.2, hcf-1, nhr-114, hlh-30, fbf-1, tdp-1, glp-1, cox-5B, jmjd-3.1, jmjd-1.2, hyl-2, skn-1, dep-1, daf-12, dpy-21, glh-4, glh-1, pgl-1, pgl-3, hrde-1, …
WBGene00045036	59.6021	0.761698	0.187085	4.0714	4.67e-05	0.00139506	2.85541	K08E4.7	Enriched in NSM\; germ line\; hypodermis\; and in male based on RNA-seq studies. Is affected by several genes including daf-2\; daf-12\; and dpy-10 based on tiling array\; microarray\; and RNA-seq studies. Is affected by thirteen chemicals including manganese chloride\; D-glucose\; and Rifampin based on RNA-seq and microarray studies. Is predicted to encode a protein with the following domains: P…	Enriched in germ line, NSM, male and hypodermis according to RNA-seq. Affected by daf-12, nhr-114, wdr-23, eat-2, nhr-62, emr-1, lem-2, prg-1, fog-3, npr-1, jmjd-3.1, hsf-1, mir-34, elli-1, glh-4, glh-1, pgl-1, pgl-3, sma-4, mir-71, hmg-3, daf-2, nhl-2, pals-22, ints-2, aak-1, aak-2, smn-1, set-2, plp-1, hlh-11, unc-30, nath-10, lin-14, lin-4, dpy-10, mir-243, tax-6, octr-1 and isp-1 according to…
WBGene00005685	19.4529	0.760065	0.197451	3.84938	0.00011842	0.00281968	2.5498	sru-22	Predicted to be located in membrane. Predicted to be integral component of membrane.	Affected by hpl-2, nhr-114, clk-1, glp-1, mir-34, hrpr-1, his-3, hmg-3, spt-16, daf-2, flcn-1, lin-29, nhr-49, eat-2 and let-60 according to tiling array, microarray and RNA-seq. Affected by tryptophan, Sodium Chloride, sucrose, stearic acid, Atrazine, single-walled carbon nanotube and Sirolimus according to microarray and RNA-seq.
WBGene00020700	42.8863	0.756492	0.199292	3.79591	0.0001471	0.00330595	2.4807	T22F3.11	Predicted to enable transmembrane transporter activity. Predicted to be involved in transmembrane transport. Predicted to be located in membrane. Predicted to be integral component of membrane.	Enriched in AVK, AIN, AIY, SDQ and neuron according to RNA-seq and microarray. Affected by alg-1, rde-4, zfp-1, rheb-1, ung-1, nhr-114, rsr-2, smg-2, smgl-1, smgl-2, tdp-1, csr-1, daf-2, npr-1, cox-5B, dop-1, hsf-1, daf-16, skn-1, dpy-21, hlh-30, emb-4, sma-2, sma-4, his-3, hpl-2, eat-2, pmt-2, pry-1, pfd-6, atfs-1, nuo-6, nhl-2, fog-2, hpx-2, mina-1, sek-1, kri-1, mpk-2, spc-1, unc-70, ints-4, n…
WBGene00017134	36956.7	0.741422	0.108969	6.80395	1.02e-11	4.32e-09	8.36452	EEED8.3	Enriched in germ line\; germline precursor cell\; head mesodermal cell\; and pharyngeal muscle cell based on tiling array and RNA-seq studies. Is affected by several genes including daf-16\; daf-2\; and rrf-3 based on microarray\; RNA-seq\; tiling array\; and proteomic studies. Is affected by seventeen chemicals including Heme\; methylmercury hydroxide\; and rotenone based on microarray and RNA-s…	Enriched in pharyngeal muscle cell, germ line, germline precursor cell and head mesodermal cell according to tiling array and RNA-seq. Affected by cgh-1, cyc-1, aak-2, rsr-2, tatn-1, fbf-1, puf-8, gld-2, daf-2, npr-1, jmjd-3.1, hyl-2, hsf-1, flp-6, lin-28, mir-34, mafr-1, daf-12, daf-16, glh-4, glh-1, pgl-1, pgl-3, ash-2, pig-1, fog-2, hrde-1, emb-4, sma-2, sma-4, smg-2, elt-2, his-69, his-70, hi…
WBGene00014254	108.575	0.741348	0.172255	4.30378	1.68e-05	0.00064762	3.18868	cyp-13A10	Predicted to enable heme binding activity\; iron ion binding activity\; and oxidoreductase activity. Predicted to be located in membrane. Predicted to be integral component of membrane. Human ortholog(s) of this gene implicated in several diseases, including Ghosal hematodiaphyseal syndrome\; familial Mediterranean fever\; and leukemia (multiple). Is an ortholog of several human genes including C…	Enriched in neuron, Z4, Z1, PLM, somatic gonad precursor and sensory neuron according to tiling array and RNA-seq. Affected by cyc-1, cid-1, sma-2, sma-4, lin-15B, wdr-23, rsr-2, drh-3, prg-1, daf-2, npr-1, jmjd-3.1, blmp-1, skn-1, dpy-21, mir-34, daf-16, glh-4, glh-1, pgl-1, pgl-3, mir-35, lin-22, mir-71, cox-5B, elt-2, nhr-49, clk-1, isp-1, nuo-6, sod-2, alg-1, hmg-4, eat-2, pry-1, damt-1, atfs…
WBGene00013559	152.012	0.740022	0.179694	4.11823	3.82e-05	0.00119321	2.92328	Y75B8A.28	Enriched in intestine based on tiling array and RNA-seq studies. Is affected by several genes including daf-16\; daf-2\; and rrf-3 based on microarray\; tiling array\; and RNA-seq studies. Is affected by ten chemicals including Heme\; D-glucose\; and nanoparticle based on microarray and RNA-seq studies.	Enriched in intestine according to tiling array and RNA-seq. Affected by lin-35, cyc-1, lin-15B, hpl-2, smg-2, aak-2, crtc-1, daf-2, fshr-1, npr-1, hyl-2, rbr-2, mir-60, chd-3, let-418, cec-4, daf-12, daf-16, glh-4, glh-1, pgl-1, pgl-3, morc-1, vit-2, alg-1, alg-2, alg-5, sta-1, adr-2, sma-2, sma-4, smg-1, elt-7, elt-2, ins-11, nuo-6, egl-9, eat-2, pmt-2, atfs-1, pals-22, efa-6, ifo-1, rrf-3, hsp…
WBGene00235094	186.184	0.739018	0.160833	4.59493	4.33e-06	0.0002338	3.63116	K08D9.9	Enriched in spermatheca based on RNA-seq studies. Is affected by several genes including daf-2\; rrf-3\; and eat-2 based on RNA-seq and microarray studies. Is affected by seven chemicals including bisphenol S\; metformin\; and Psoralens based on RNA-seq studies.	Enriched in spermatheca according to RNA-seq. Affected by daf-2, hrpr-1, fog-2, sma-2, mir-71, cox-5B, isp-1, nuo-6, eat-2, hda-6, rrf-3, ints-1, sek-1, aak-1, aak-2, kri-1, mpk-2, numr-1, numr-2, mrps-5, stt-3, daf-1, olrn-1, anc-1, ikb-1, nfki-1, unc-30, hrde-1, mep-1, nhr-49 and sir-2.1 according to RNA-seq and microarray. Affected by bisphenol S, metformin, Psoralens, allantoin, Sirolimus, Ri…
WBGene00009964	128.064	0.735906	0.18099	4.06599	4.78e-05	0.00142176	2.84717	fip-6	Enriched in AWA\; germline precursor cell\; and hypodermis based on tiling array and RNA-seq studies. Is affected by several genes including daf-16\; daf-2\; and glp-1 based on microarray\; tiling array\; and RNA-seq studies. Is affected by fifteen chemicals including Nitric Oxide\; methylmercury hydroxide\; and rotenone based on RNA-seq and microarray studies.	Enriched in germline precursor cell, hypodermis and AWA according to tiling array and RNA-seq. Affected by cyc-1, lin-15B, hpl-2, nhr-114, lem-2, emr-1, hlh-30, prg-1, ubc-9, clk-1, wrn-1, daf-2, glp-1, jmjd-1.2, hsf-1, mir-34, daf-12, daf-16, glh-4, glh-1, pgl-1, pgl-3, hrde-1, alg-1, alg-5, lin-22, mir-71, cox-5B, dpy-7, his-69, his-70, his-72, his-74, his-71, egl-9, eat-2, pry-1, atfs-1, hda-6…
WBGene00000282	2289.5	0.7317	0.117151	6.24581	4.22e-10	1.14e-07	6.9431	cah-4	Enables carbonate dehydratase activity. Involved in small molecule metabolic process. Expressed in several structures, including body wall musculature\; enteric muscle\; excretory cell\; rectal muscle\; and somatic nervous system. Is an ortholog of human CA13 (carbonic anhydrase 13) and CA3 (carbonic anhydrase 3).	Enriched in excretory cell, GABAergic neuron, germline precursor cell, pharyngeal muscle cell, ADF, AIN, AIZ, AUA, PQR, RIB, RIH, RIR, URX, male-specific anatomical entity and intestine according to tiling array, RNA-seq and microarray. Affected by vhl-1, rde-4, cyc-1, cid-1, mab-5, aak-2, age-1, let-7, gld-1, tatn-1, lem-2, emr-1, clk-1, daf-2, daf-16, tcer-1, rsks-1, jmjd-1.2, hsf-1, skn-1, dpy…
WBGene00010216	40.9036	0.731223	0.20139	3.63089	0.00028245	0.00521277	2.28293	F57G8.7	Enriched in several structures, including cephalic sheath cell\; coelomocyte\; dopaminergic neurons\; mechanosensory neurons\; and ventral nerve cord based on tiling array studies. Is affected by several genes including daf-16\; daf-2\; and daf-12 based on microarray\; tiling array\; RNA-seq\; and studies. Is affected by sixteen chemicals including Heme\; Tunicamycin\; and Zidovudine based on mic…	Enriched in cephalic sheath cell, coelomocyte, dopaminergic neuron, ventral nerve cord, hypodermis, PVD and OLL according to tiling array. Affected by daf-12, hpl-2, rsr-2, ubc-9, clk-1, ash-2, tdp-1, dop-1, daf-2, mir-34, hrpr-1, daf-16, dpy-21, glh-4, glh-1, pgl-1, pgl-3, hrde-1, alg-1, emb-4, cox-5B, isp-1, nuo-6, hmg-3, flr-4, adr-1, damt-1, atfs-1, mdt-15, smn-1, ints-4, numr-1, numr-2, raga…
WBGene00021514	5411.55	0.731065	0.181902	4.01901	5.84e-05	0.00164311	2.78433	Y41D4B.11	Predicted to be located in nucleus.	Enriched in body wall muscle cell and germ line according to tiling array and RNA-seq. Affected by eat-2, let-7, gld-1, tatn-1, daf-16, swsn-2.2, hsf-1, emb-4, isp-1, nuo-6, alg-1, nhl-2, pals-22, aak-1, aak-2, iff-1, mrps-5, set-2, atp-2, unc-30, sir-2.1, lin-54 and tdp-1 according to RNA-seq, proteomic study and microarray. Affected by D-glucose, Chlorpyrifos, Diazinon and Humic Substances acco…
WBGene00043983	616.898	0.730575	0.149212	4.89623	9.77e-07	7.52e-05	4.12378	C39D10.11	Enriched in head mesodermal cell\; intestine\; and neurons based on tiling array and RNA-seq studies. Is affected by several genes including daf-16\; daf-2\; and glp-1 based on RNA-seq\; microarray\; and studies. Is affected by seven chemicals including Tunicamycin\; D-glucopyranose\; and stavudine based on microarray and RNA-seq studies.	Enriched in DA neuron, VA neuron, dopaminergic neuron, intestine, neuron, ASER, head mesodermal cell, sensory neuron and AIZ according to tiling array and RNA-seq. Affected by lem-2, emr-1, prg-1, daf-2, glp-1, mdt-15, daf-16, jmjd-3.1, chd-3, let-418, dpy-21, mir-34, glh-4, glh-1, pgl-1, pgl-3, emb-4, sma-2, sma-4, elt-2, elt-7, flr-4, nhl-2, rpl-33, rpl-5, sek-1, nmad-1, sin-3, egl-43, wdr-23, …
WBGene00010062	544.793	0.726868	0.199455	3.64426	0.00026816	0.00503342	2.29814	lipl-1	Predicted to enable hydrolase activity, acting on ester bonds. Involved in lipid catabolic process. Located in lysosome. Expressed in intestine. Human ortholog(s) of this gene implicated in Wolman disease\; autosomal recessive congenital ichthyosis 8\; and cholesterol ester storage disease. Is an ortholog of several human genes including LIPA (lipase A, lysosomal acid type)\; LIPF (lipase F, gast…	Enriched in intestine according to RNA-seq and microarray. Affected by alg-1, rde-4, zfp-1, cyc-1, lin-15B, age-1, daf-16, smgl-1, eat-2, prg-1, daf-2, glp-1, npr-1, jmjd-1.2, hsf-1, rbr-2, dpy-21, daf-12, glh-4, glh-1, pgl-1, pgl-3, hrde-1, morc-1, exc-7, mbl-1, emb-4, sid-3, sta-1, sma-2, sma-4, lin-22, cox-5B, elt-7, elt-2, nuo-6, his-69, his-70, his-72, his-74, his-71, flr-4, pmt-2, hif-1, at…
WBGene00077692	36.3424	0.72683	0.201335	3.61006	0.00030612	0.00548088	2.26115	C08E8.10	Enriched in several structures, including PLM\; cephalic sheath cell\; dopaminergic neurons\; germline precursor cell\; and somatic gonad precursor based on tiling array and RNA-seq studies. Is affected by several genes including daf-16\; daf-2\; and glp-1 based on RNA-seq and microarray studies. Is affected by sixteen chemicals including rotenone\; sodium arsenite\; and multi-walled carbon nanot…	Enriched in cephalic sheath cell, dopaminergic neuron, germline precursor cell, hypodermis, PLM and somatic gonad precursor according to tiling array and RNA-seq. Affected by wdr-23, smg-2, smgl-1, smgl-2, prg-1, daf-2, glp-1, skn-1, daf-16, alg-1, alg-2, alg-5, dpy-7, nhr-49, hpl-2, flr-4, atfs-1, mpk-2, spc-1, mex-1, spn-4, sftb-1, alh-6, isp-1, ikb-1, nfki-1, swsn-9, met-2, unc-30 and csr-1 ac…
WBGene00021183	114.829	0.724885	0.184756	3.92347	8.73e-05	0.00221788	2.65406	Y9C9A.16	Predicted to enable FAD binding activity and sulfide:quinone oxidoreductase activity. Predicted to be involved in sulfide oxidation, using sulfide:quinone oxidoreductase. Predicted to be located in mitochondrion. Is an ortholog of human SQOR (sulfide quinone oxidoreductase).	Enriched in dopaminergic neuron, hypodermis, PLM, sensory neuron and BDU according to tiling array and RNA-seq. Affected by nhr-114, rsks-1, daf-2, prg-1, fbf-1, clk-1, wdr-5.1, wrn-1, glp-1, jmjd-1.2, blmp-1, hsf-1, mir-34, daf-12, daf-16, dpy-21, glh-4, glh-1, pgl-1, pgl-3, lin-22, cox-5B, dpy-7, isp-1, nuo-6, drh-3, hmg-3, hmg-4, spt-16, eat-2, pfd-6, atfs-1, zip-3, sek-1, flcn-1, klf-1, set-2…
WBGene00000712	38.1479	0.712352	0.199564	3.56955	0.0003576	0.00615083	2.21107	col-139	Predicted to be a structural constituent of cuticle. Predicted to be located in membrane. Predicted to be integral component of membrane.	Enriched in hypodermis according to tiling array. Affected by atx-3, clk-1, cyc-1, wdr-23, blmp-1, hlh-30, prg-1, tdp-1, daf-2, glp-1, daf-16, npr-1, hyl-2, rbr-2, mir-60, chd-3, let-418, lmn-1, dpy-21, mafr-1, lin-41, let-7, glh-4, glh-1, pgl-1, pgl-3, morc-1, alg-1, alg-2, emb-4, sma-2, sma-4, mir-71, cox-5B, dpy-7, nuo-6, drh-3, set-26, pry-1, pfd-6, nhl-2, pals-25, efa-6, ptl-1, ptrn-1, hsp-6…
WBGene00001779	34.806	0.711483	0.201158	3.53694	0.00040479	0.00669863	2.17401	gst-31	Predicted to enable glutathione transferase activity. Predicted to be involved in glutathione metabolic process. Is an ortholog of human HPGDS (hematopoietic prostaglandin D synthase).	Enriched in AFD, ASER, PLM, sensory neuron, AVG, I5 neuron, DA neuron, SAB, retrovesicular ganglion, VA neuron and neuron according to RNA-seq and microarray. Affected by wdr-23, daf-2, daf-16, npr-1, skn-1, dpy-21, mir-34, daf-12, glh-4, glh-1, pgl-1, pgl-3, cox-5B, nhr-49, isp-1, nuo-6, his-69, his-70, his-72, his-74, his-71, alg-1, eat-2, pry-1, damt-1, atfs-1, sek-1, unc-70, numr-1, numr-2, m…
WBGene00009885	1380.74	0.705197	0.134775	5.2324	1.67e-07	1.92e-05	4.7167	moc-5	Predicted to enable several functions, including 4 iron, 4 sulfur cluster binding activity\; GTP 3',8'-cyclase activity\; and ion binding activity. Predicted to be involved in Mo-molybdopterin cofactor biosynthetic process. Predicted to be part of molybdopterin synthase complex. Human ortholog(s) of this gene implicated in molybdenum cofactor deficiency type A. Is an ortholog of human MOCS1 (moly…	Enriched in excretory cell, GABAergic neuron, somatic gonad precursor, neuron, muscle cell and body wall musculature according to tiling array, RNA-seq and microarray. Affected by zfp-1, age-1, sma-2, wdr-23, prg-1, hsf-1, dpy-21, mir-34, glh-4, glh-1, pgl-1, pgl-3, sma-4, elt-7, elt-2, pmt-2, rrf-3, aak-1, aak-2, mex-1, mex-3, sin-3, spn-4, mrps-5, set-6, baz-2, egl-43, spr-1, sir-2.1, dcr-1, ai…
WBGene00007404	202.124	0.704011	0.149822	4.69897	2.61e-06	0.00016271	3.78859	best-5	Predicted to enable chloride channel activity. Predicted to be involved in chloride transport. Predicted to be located in plasma membrane. Predicted to be integral component of membrane. Predicted to be part of chloride channel complex. Human ortholog(s) of this gene implicated in autosomal dominant vitreoretinochoroidopathy and retinal degeneration (multiple). Is an ortholog of human BEST1 (best…	Enriched in intestine and head mesodermal cell according to RNA-seq. Affected by rde-4, zfp-1, lin-15B, smgl-1, eat-2, clk-1, daf-2, skn-1, swsn-2.2, npr-1, dop-1, rbr-2, dpy-21, mir-34, glh-4, glh-1, pgl-1, pgl-3, ash-2, alg-1, alg-2, alg-5, sma-2, sma-4, lin-22, elt-7, elt-2, nhr-49, isp-1, nuo-6, adr-2, pry-1, damt-1, atfs-1, nhl-2, ifo-1, rrf-3, hsp-6, aak-1, aak-2, ceh-60, mex-3, lmn-1, daf-…
WBGene00010846	10230.7	0.70312	0.1218	5.77273	7.8e-09	1.5e-06	5.82391	M04B2.2	Predicted to enable tRNA (guanine) methyltransferase activity. Predicted to be involved in tRNA methylation. Is an ortholog of human THUMPD3 (THUMP domain containing 3).	Enriched in body wall muscle cell, AFD, ASER, intestine, germ line and germline precursor cell according to tiling array and RNA-seq. Affected by daf-12, tatn-1, prg-1, clk-1, mir-34, glh-4, glh-1, pgl-1, pgl-3, emb-4, smg-2, isp-1, nuo-6, hpl-2, damt-1, iff-1, olrn-1, atfs-1, unc-30, sir-2.1, mir-243, lin-54, lin-35 and eat-2 according to tiling array, RNA-seq and microarray. Affected by mangane…
WBGene00019958	4920.5	0.702182	0.167882	4.18259	2.88e-05	0.00098999	3.00437	#N/A	#N/A	#N/A
WBGene00015551	5763.89	0.700881	0.120055	5.83801	5.28e-09	1.06e-06	5.97469	adah-1	Predicted to enable adenosine deaminase activity. Predicted to be involved in negative regulation of adenosine receptor signaling pathway and purine-containing compound metabolic process. Predicted to be located in cytosol and external side of plasma membrane. Human ortholog(s) of this gene implicated in several diseases, including Legionnaires' disease\; Q fever\; and lung disease (multiple). Is…	Enriched in PVD, OLL, intestine, muscle cell, sensory neuron, I2 neuron, I3 neuron and PVP according to tiling array and RNA-seq. Affected by age-1, atx-3, daf-12, wdr-23, daf-2, daf-16, tatn-1, hlh-30, glp-1, cox-5B, jmjd-3.1, jmjd-1.2, chd-3, let-418, skn-1, mir-34, glh-4, glh-1, pgl-1, pgl-3, emb-4, sma-2, sma-4, lin-22, nhl-2, pals-22, aak-1, aak-2, nmad-1, unc-70, sin-3, set-6, baz-2, egl-43…
WBGene00019588	252.431	0.698451	0.154746	4.51352	6.38e-06	0.00031432	3.50263	K09F6.5	Is affected by several genes including eat-2\; sir-2.1\; and pgl-1 based on RNA-seq and microarray studies. Is affected by eleven chemicals including hydrogen sulfide\; metformin\; and Sirolimus based on microarray and RNA-seq studies.	Affected by lem-2, emr-1, set-25, met-2, glh-4, glh-1, pgl-1, pgl-3, hpl-2, alg-1, dlc-1, eat-2, pmt-2, ints-1, hsb-1, aak-1, aak-2, meg-3, meg-4, mrps-5, nfki-1, atfs-1, prx-5, sir-2.1 and mir-243 according to RNA-seq and microarray. Affected by hydrogen sulfide, metformin, Sirolimus, Rifampin, allantoin, Cadmium Chloride, stearic acid, sucrose, Atrazine, paraquat and dibromoacetic acid accordin…
WBGene00044998	598.89	0.697825	0.19978	3.49296	0.0004777	0.007498	2.12505	M199.9	Enriched in cephalic sheath cell based on tiling array studies. Is affected by several genes including daf-2\; eat-2\; and tph-1 based on tiling array\; RNA-seq\; microarray\; and studies. Is affected by eleven chemicals including 1-methylnicotinamide\; bisphenol A\; and Psoralens based on RNA-seq and microarray studies.	Enriched in cephalic sheath cell according to tiling array. Affected by rsr-2, daf-2, dop-1, mir-34, emb-4, drh-3, hpl-2, alg-1, hmg-3, pmt-2, nhl-2, fog-2, pals-22, pals-25, efa-6, ptl-1, sek-1, kri-1, iff-1, nhr-14, npr-8, stt-3, daf-1, daf-3, srbc-48, acr-2, isp-1, pqm-1, plp-1, swsn-1, cat-2, tbh-1, tph-1, eat-2 and nhr-49 according to tiling array, RNA-seq and microarray. Affected by 1-methy…
WBGene00016664	1156.18	0.693823	0.124569	5.56981	2.55e-08	4.2e-06	5.37675	C45E5.1	Predicted to enable phosphatase activity. Predicted to be involved in dephosphorylation. Predicted to be located in cytoplasm. Is an ortholog of human PDXP (pyridoxal phosphatase) and PGP (phosphoglycolate phosphatase).	Enriched in hypodermis, intestine, PVD, OLL and PLM according to tiling array and RNA-seq. Affected by nhr-49, smg-2, smgl-1, lem-2, emr-1, ubc-9, wrn-1, mdt-15, daf-16, elt-2, skn-1, mir-34, elli-1, glh-4, glh-1, pgl-1, pgl-3, emb-4, sma-2, lin-22, mir-71, daf-2, flr-4, eat-2, damt-1, nhl-2, ifo-1, atf-7, hsp-6, sek-1, aak-1, aak-2, smn-1, spc-1, unc-70, sin-3, cfp-1, sftb-1, mrps-5, hira-1, nfk…
WBGene00005602	275.003	0.691755	0.129374	5.34694	8.95e-08	1.15e-05	4.9393	srj-14	Predicted to be located in membrane. Predicted to be integral component of membrane.	Affected by wdr-23, lem-2, emr-1, clk-1, daf-2, glp-1, npr-1, cec-4, mir-34, elli-1, daf-16, emb-4, sma-2, sma-4, lin-22, smg-2, elt-2, nuo-6, eat-2, pmt-2, pry-1, damt-1, nhl-2, aak-1, aak-2, smn-1, unc-70, wdr-5.1, sacy-1, ngn-1, isp-1, pqm-1, plp-1, unc-30, daf-18, csr-1, tax-6, tdp-1 and nhr-25 according to RNA-seq and microarray. Affected by tryptophan, rotenone, Psoralens, allantoin, Siroli…
WBGene00017335	301.082	0.691355	0.124581	5.54943	2.87e-08	4.56e-06	5.34104	F10D2.10	Enriched in body wall muscle cell\; coelomocyte\; germ line\; head mesodermal cell\; and intestine based on proteomic\; tiling array\; RNA-seq\; and microarray studies. Is affected by several genes including daf-16\; daf-2\; and daf-12 based on RNA-seq and microarray studies. Is affected by sixteen chemicals including Ethanol\; 1-methylnicotinamide\; and Tunicamycin based on RNA-seq and microarra…	Enriched in germ line, body wall muscle cell, coelomocyte, intestine and head mesodermal cell according to proteomic study, tiling array, RNA-seq and microarray. Affected by aak-2, spe-44, nhr-8, prg-1, tdp-1, elt-2, npr-1, cox-5B, jmjd-3.1, hsf-1, chd-3, let-418, daf-12, daf-16, dpy-21, glh-4, glh-1, pgl-1, pgl-3, sma-4, lin-22, elt-7, daf-2, sod-2, eat-2, pmt-2, pry-1, nhl-2, pals-25, mdt-15, r…
WBGene00009033	14.4093	0.687004	0.195469	3.51464	0.00044034	0.00712745	2.14707	F21H7.12	Predicted to be located in membrane. Predicted to be integral component of membrane.	Enriched in dopaminergic neuron, hypodermis, germ line and intestine according to tiling array, RNA-seq and microarray. Affected by cyc-1, nhr-114, rsr-2, smgl-2, bar-1, clk-1, daf-2, daf-16, mir-34, daf-12, dpy-21, glh-4, glh-1, pgl-1, pgl-3, emb-4, lin-22, mir-71, cox-5B, his-3, dpy-7, isp-1, nuo-6, sod-2, hmg-3, spt-16, eat-2, aak-1, aak-2, flcn-1, ints-4, sftb-1, mrps-5, srbc-48, pqm-1, nas-3…
WBGene00002088	36.3996	0.685082	0.20102	3.40803	0.00065434	0.00917984	2.03716	ins-5	Predicted to enable hormone activity. Involved in dauer larval development. Predicted to be located in extracellular region. Expressed in several structures, including coelomocyte\; head muscle\; neurons\; somatic nervous system\; and vulva.	Enriched in neuron, AFD, germ line, sensory neuron, ASI and ASJ according to RNA-seq. Affected by cyc-1, wdr-23, emr-1, prg-1, csr-1, daf-16, dpy-21, glh-4, glh-1, pgl-1, pgl-3, alg-1, sma-2, lin-22, cox-5B, daf-2, isp-1, nuo-6, drh-3, set-26, pmt-2, damt-1, atfs-1, aak-1, aak-2, nmad-1, numr-1, numr-2, iff-1, cfp-1, olrn-1, hira-1, bcat-1, fhod-1, unc-30, hda-1, mep-1, pmk-1, crh-1, tax-6, nhr-2…
WBGene00008483	134.305	0.68476	0.176558	3.8784	0.00010515	0.0025603	2.59171	E04D5.4	Enriched in AFD\; OLL\; PVD\; dopaminergic neurons\; and intestine based on tiling array and RNA-seq studies. Is affected by several genes including daf-16\; daf-2\; and daf-12 based on tiling array\; RNA-seq\; microarray\; and studies. Is affected by twenty chemicals including 1-methylnicotinamide\; Tunicamycin\; and mianserin based on RNA-seq and microarray studies. Is predicted to encode a pro…	Enriched in dopaminergic neuron, intestine, PVD, OLL and AFD according to tiling array and RNA-seq. Affected by daf-12, hpl-2, smg-2, smgl-1, emr-1, lem-2, clk-1, daf-2, cox-5B, jmjd-3.1, hyl-2, mir-34, daf-16, dpy-21, set-4, glh-4, glh-1, pgl-1, pgl-3, ash-2, emb-4, sid-3, sta-1, sma-2, sma-4, lin-22, mir-71, elt-7, dpy-7, isp-1, flr-4, eat-2, pmt-2, pfd-6, nhl-2, nhr-86, sek-1, ceh-60, kri-1, i…
WBGene00011462	26.8498	0.678942	0.20012	3.39268	0.00069211	0.00957536	2.01884	vap-2	Predicted to be located in membrane. Predicted to be integral component of membrane. Is an ortholog of human CRISP2 (cysteine rich secretory protein 2) and CRISP3 (cysteine rich secretory protein 3).	Enriched in hypodermis, hermaphrodite-specific anatomical entity and intestine according to RNA-seq and microarray. Affected by atx-3, sma-2, sma-4, rsr-2, smg-2, smgl-1, smgl-2, eat-2, daf-2, ham-3, hyl-2, daf-16, mafr-1, lin-22, mir-71, ins-11, nuo-6, drh-3, set-26, hpl-2, pmt-2, pry-1, pfd-6, atfs-1, nhl-2, pals-22, efa-6, rrf-3, ints-2, adr-1, smn-1, ints-4, numr-1, numr-2, sftb-1, mir-1, npr…
WBGene00050885	1452.31	0.677971	0.138297	4.90228	9.47e-07	7.33e-05	4.1349	Y94H6A.12	Predicted to enable aminoacyl-tRNA hydrolase activity. Is an ortholog of human PTRHD1 (peptidyl-tRNA hydrolase domain containing 1).	Enriched in body wall muscle cell, intestine and somatic gonad precursor according to tiling array and RNA-seq. Affected by prg-1, jmjd-3.1, pmt-2, damt-1, meg-3, meg-4, hcf-1, sir-2.1 and daf-2 according to RNA-seq and microarray. Affected by rotenone, stavudine, Rifampin, allantoin and antimycin according to RNA-seq.
WBGene00017315	56.2072	0.67579	0.187442	3.60533	0.00031176	0.00555333	2.25545	ugt-36	Predicted to enable glucuronosyltransferase activity. Predicted to be located in intracellular membrane-bounded organelle. Human ortholog(s) of this gene implicated in several diseases, including Crigler-Najjar syndrome\; Gilbert syndrome\; and female reproductive organ cancer (multiple). Is an ortholog of several human genes including UGT1A10 (UDP glucuronosyltransferase family 1 member A10)\; U…	Enriched in excretory cell, AFD, ASER, PLM and neuron according to tiling array, RNA-seq and microarray. Affected by cyc-1, atfs-1, spg-7, nhr-114, rsr-2, smg-2, smgl-1, ubc-9, clk-1, cox-5B, jmjd-3.1, daf-2, mir-60, dpy-21, mir-34, lin-22, isp-1, nuo-6, eat-2, pmt-2, pry-1, damt-1, hsp-6, mdt-15, kri-1, mpk-2, unc-70, spn-4, wdr-5.1, mrps-5, malt-1, nfki-1, ilc-17.1, bcat-1, hlh-11, swsn-1, cat-…
WBGene00010578	54.2488	0.675742	0.195681	3.45328	0.00055382	0.00817941	2.08728	K04H8.3	Enriched in male-specific anatomical entity and in male based on RNA-seq and microarray studies. Is affected by several genes including daf-2\; rrf-3\; and eat-2 based on tiling array\; microarray\; and RNA-seq studies. Is affected by four chemicals including allantoin\; Sirolimus\; and metformin based on RNA-seq and microarray studies.	Enriched in male and male-specific anatomical entity according to RNA-seq and microarray. Affected by rsr-2, clk-1, glh-4, glh-1, pgl-1, pgl-3, sma-2, sma-4, cox-5B, hmg-4, spt-16, eat-2, daf-2, nhl-2, rrf-3, aak-1, aak-2, adr-1, ints-4, cfp-1, set-2, mrps-5, nfki-1, cat-2, tbh-1, tph-1, nhr-49, csr-1, rrf-2 and ain-1 according to tiling array, microarray and RNA-seq. Affected by allantoin, Sirol…
WBGene00009397	1450.64	0.674196	0.130408	5.16989	2.34e-07	2.51e-05	4.60033	clec-66	Predicted to enable carbohydrate binding activity. Involved in innate immune response. Expressed in intestine.	Enriched in intestine according to tiling array and RNA-seq. Affected by daf-12, cyc-1, lin-15B, age-1, nhr-49, hcf-1, atfs-1, spg-7, wdr-23, smg-2, nhr-8, let-7, gld-1, prg-1, wrn-1, lin-35, elt-2, daf-2, glp-1, skn-1, fshr-1, mdt-15, hrde-1, daf-16, npr-1, jmjd-3.1, jmjd-1.2, blmp-1, hyl-2, hsf-1, rbr-2, let-418, lmn-1, mir-34, glh-4, glh-1, pgl-1, pgl-3, morc-1, alg-1, atm-1, emb-4, sid-3, sta…
WBGene00019113	186.762	0.672403	0.153605	4.37748	1.2e-05	0.00050327	3.2982	F59E11.7	Predicted to be located in membrane. Predicted to be integral component of membrane. Expressed in AVG.	Enriched in dopaminergic neuron, hypodermis, Z4, Z1, gon_male_dtc posterior, gon_male_dtc anterior, Z1.p, Z4.a, somatic gonad precursor, sensory neuron and AVG according to tiling array and RNA-seq. Affected by hda-1, cyc-1, nhr-114, rsr-2, smgl-1, eat-2, nhr-62, blmp-1, prg-1, fbf-1, clk-1, tdp-1, daf-2, glp-1, npr-1, jmjd-1.2, dop-1, dpy-21, mir-34, daf-12, daf-16, glh-4, glh-1, pgl-1, pgl-3, m…
WBGene00018725	22.7721	0.671679	0.197147	3.407	0.00065681	0.00920524	2.03596	kreg-1	Involved in stress response to copper ion.	Enriched in PVD, OLL, intestine, ASER and head mesodermal cell according to microarray, tiling array and RNA-seq. Affected by hda-1, cyc-1, lin-15B, wdr-23, smg-2, smgl-1, nhr-8, lem-2, emr-1, prg-1, fbf-1, clk-1, wrn-1, glp-1, skn-1, npr-1, cox-5B, hyl-2, hsf-1, mir-60, chd-3, let-418, dpy-21, mir-34, hrpr-1, glh-4, glh-1, pgl-1, pgl-3, mir-35, alg-1, alg-2, alg-5, exc-7, mbl-1, emb-4, sma-2, sm…
WBGene00004008	2912.61	0.671495	0.141639	4.7409	2.13e-06	0.00013603	3.86637	pgp-14	Predicted to enable ATPase-coupled transmembrane transporter activity. Involved in response to nematicide. Predicted to be integral component of membrane. Human ortholog(s) of this gene implicated in several diseases, including autoimmune disease (multiple)\; carcinoma (multiple)\; and intrahepatic cholestasis (multiple). Is an ortholog of several human genes including ABCB1 (ATP binding cassette…	Enriched in arcade cell, pharyngeal-intestinal valve cell, pharyngeal muscle cell and NSM according to RNA-seq and proteomic study. Affected by cyc-1, hpl-2, let-7, wdr-23, eat-2, gld-1, bar-1, clk-1, wrn-1, daf-2, glp-1, jmjd-3.1, jmjd-1.2, skn-1, mir-34, glh-4, glh-1, pgl-1, pgl-3, alg-1, alg-2, sma-2, sma-4, lin-22, ins-11, dpy-7, isp-1, nuo-6, set-9, set-26, egl-9, spt-16, dlc-1, pmt-2, pry-1…
WBGene00003715	185.654	0.668407	0.150919	4.42892	9.47e-06	0.00042039	3.37635	nhr-125	Predicted to enable DNA-binding transcription factor activity\; sequence-specific DNA binding activity\; and zinc ion binding activity. Predicted to be involved in regulation of transcription, DNA-templated. Predicted to be located in nucleus. Human ortholog(s) of this gene implicated in several diseases, including Alzheimer's disease\; cystic fibrosis\; fatty liver disease\; and hepatocellular c…	Enriched in intestine and somatic gonad precursor according to RNA-seq. Affected by eat-2, clk-1, daf-2, mir-34, glh-4, glh-1, pgl-1, pgl-3, lin-22, isp-1, nuo-6, pry-1, pals-22, atf-7, pmk-1, mex-1, mex-3, sin-3, spn-4, daf-12, srbc-48, set-2 and atfs-1 according to RNA-seq and microarray. Affected by multi-walled carbon nanotube, stavudine, Psoralens, allantoin, Sirolimus, Rifampin, paraquat an…
WBGene00022546	86.3961	0.66615	0.181517	3.6699	0.00024265	0.00475146	2.32317	ZC196.2	Predicted to enable FFAT motif binding activity. Predicted to be involved in endoplasmic reticulum membrane organization and endoplasmic reticulum-plasma membrane tethering. Predicted to be located in endoplasmic reticulum membrane and plasma membrane. Human ortholog(s) of this gene implicated in amyotrophic lateral sclerosis type 8 and autosomal dominant adult-onset proximal spinal muscular atro…	Enriched in dopaminergic neuron and intestine according to tiling array. Affected by cyc-1, lin-15B, lin-35, daf-16, hpl-2, prp-8, smgl-1, rsks-1, daf-2, bar-1, fbf-1, clk-1, wrn-1, glp-1, hsf-1, mir-34, daf-12, dpy-21, glh-4, glh-1, pgl-1, pgl-3, isp-1, nuo-6, hmg-3, eat-2, damt-1, atfs-1, pals-22, pals-25, hsp-6, mpk-2, spc-1, unc-70, ints-4, sftb-1, klf-1, daf-3, lsm-1, nas-38, met-2, spr-5, p…
WBGene00017060	145.61	0.664384	0.16816	3.95089	7.79e-05	0.002027	2.69315	D2063.1	Predicted to enable alcohol dehydrogenase (NAD+) activity. Located in striated muscle dense body.	Enriched in PLM, body wall muscle cell, sensory neuron, ADF, AWA and muscle cell according to RNA-seq, proteomic study and microarray. Affected by hpl-2, smgl-1, smgl-2, ubc-9, npr-1, rbr-2, cec-4, glh-4, glh-1, pgl-1, pgl-3, emb-4, adr-2, lin-22, elt-2, elt-7, smo-1, ins-11, daf-2, alg-1, egl-9, eat-2, atfs-1, nuo-6, pals-22, pals-25, hda-6, ifo-1, rrf-3, sek-1, aak-1, aak-2, smn-1, spc-1, unc-7…
WBGene00020947	961.598	0.660547	0.119209	5.54107	3.01e-08	4.68e-06	5.32975	W02F12.2	Predicted to enable N-acylsphingosine amidohydrolase activity. Predicted to be involved in sphingosine biosynthetic process. Predicted to be integral component of Golgi membrane. Is an ortholog of human ACER2 (alkaline ceramidase 2).	Enriched in arcade cell, pharyngeal-intestinal valve cell, somatic gonad precursor and sensory neuron according to RNA-seq. Affected by cyc-1, lin-15B, wdr-23, smgl-1, nhr-8, eat-2, clk-1, blmp-1, hsf-1, dpy-21, mir-34, elli-1, daf-12, daf-16, glh-4, glh-1, pgl-1, pgl-3, alg-1, alg-2, fog-2, sma-4, cox-5B, isp-1, egl-9, pry-1, nhl-2, ints-1, aak-1, aak-2, nmad-1, ints-4, mex-1, mex-3, sin-3, set-…
WBGene00000783	380.666	0.659154	0.193907	3.39933	0.00067551	0.00941188	2.02632	cpr-3	Predicted to enable cysteine-type endopeptidase activity. Involved in innate immune response. Predicted to be located in extracellular space and lysosome. Human ortholog(s) of this gene implicated in several diseases, including autoimmune disease of the nervous system (multiple)\; carcinoma (multiple)\; and type 2 diabetes mellitus. Is an ortholog of human CTSB (cathepsin B).	Enriched in intestine, PVD, OLL, CEPshVR, CEPshVL, CEPshDR, CEPshDL, head mesodermal cell and rectal gland cell according to tiling array, RNA-seq and microarray. Affected by zfp-1, alg-1, cyc-1, sma-2, lin-15B, hpl-2, wdr-23, smg-2, smgl-1, nhr-8, emr-1, lem-2, tdp-1, daf-2, glp-1, mdt-15, swsn-2.2, elt-2, npr-1, hyl-2, hsf-1, rbr-2, mir-60, chd-3, let-418, flp-6, daf-16, skn-1, skr-2, skr-1, kg…
WBGene00017621	155.622	0.654749	0.167875	3.90022	9.61e-05	0.00239852	2.62006	txt-17	Enriched in PLM\; dopaminergic neurons\; intestine\; neuronal sheath cell\; and in male based on tiling array\; RNA-seq\; and microarray studies. Is affected by several genes including daf-16\; daf-2\; and glp-1 based on microarray\; RNA-seq\; and studies. Is affected by fifteen chemicals including rotenone\; D-glucose\; and Cry5B based on RNA-seq and microarray studies. Is predicted to encode a …	Enriched in cephalic sheath cell, dopaminergic neuron, amphid sheath cell, male, PLM and intestine according to tiling array, RNA-seq and microarray. Affected by daf-16, cid-1, smgl-1, smgl-2, emr-1, lem-2, set-2, wrn-1, daf-2, glp-1, hsf-1, hlh-30, mir-34, glh-4, glh-1, pgl-1, pgl-3, mir-35, emb-4, lin-22, elt-2, pmt-2, pry-1, nhl-2, ints-5, ints-6, hsb-1, aak-1, aak-2, nmad-1, spc-1, unc-70, me…
WBGene00008032	5357.26	0.653494	0.127721	5.1166	3.11e-07	3.13e-05	4.50446	C39E9.8	Enriched in germline precursor cell\; hypodermis\; and intestine based on tiling array and microarray studies. Is affected by several genes including daf-16\; daf-2\; and dpy-10 based on microarray and RNA-seq studies. Is affected by twenty-four chemicals including 1-methylnicotinamide\; D-glucose\; and Cry5B based on RNA-seq and microarray studies.	Enriched in germline precursor cell, hypodermis and intestine according to tiling array and microarray. Affected by cyc-1, aak-2, atfs-1, spg-7, wdr-23, lem-2, emr-1, bar-1, prg-1, clk-1, wdr-5.1, tdp-1, daf-2, npr-1, cox-5B, jmjd-3.1, jmjd-1.2, hyl-2, rbr-2, chd-3, dpy-21, hlh-30, mir-34, glh-4, glh-1, pgl-1, pgl-3, mir-35, hrde-1, vit-2, alg-1, alg-2, emb-4, sma-2, lin-22, isp-1, nuo-6, set-9, …
WBGene00000781	6846.22	0.653128	0.115762	5.64201	1.68e-08	2.91e-06	5.53611	cpr-1	Predicted to enable cysteine-type endopeptidase activity. Predicted to be involved in proteolysis involved in cellular protein catabolic process. Predicted to be located in extracellular space and lysosome. Human ortholog(s) of this gene implicated in several diseases, including autoimmune disease of the nervous system (multiple)\; carcinoma (multiple)\; and type 2 diabetes mellitus. Is an orthol…	Enriched in intestine, PVD, OLL, AVA, hypodermis, head mesodermal cell, I5 neuron, DA neuron, SAB, retrovesicular ganglion, VA neuron, neuron and muscle cell according to SAGE analysis, microarray, tiling array, RNA-seq and proteomic study. Affected by rde-4, zfp-1, cyc-1, hlh-30, sam-10, aak-2, daf-16, wdr-23, smgl-1, clk-1, wrn-1, tdp-1, glh-4, glh-1, pgl-1, pgl-3, daf-2, glp-1, fshr-1, ham-3, …
WBGene00219795	202.984	0.651461	0.127136	5.12411	2.99e-07	3.05e-05	4.5157	C02F5.15	Is affected by cep-1 and nfki-1 based on RNA-seq studies. Is affected by Tunicamycin based on RNA-seq studies.	Affected by cep-1, nfki-1 and fzo-1 according to RNA-seq. Affected by Tunicamycin according to RNA-seq.
WBGene00220049	57.7243	0.650352	0.178763	3.63807	0.00027469	0.00511418	2.29122	R106.7	Enriched in head mesodermal cell and sensory neurons based on RNA-seq studies. Is affected by several genes including sek-1\; cep-1\; and sma-4 based on RNA-seq studies. Is affected by stavudine based on RNA-seq studies.	Enriched in head mesodermal cell and sensory neuron according to RNA-seq. Affected by cep-1, sma-4, nuo-6, sek-1, set-2 and atfs-1 according to RNA-seq. Affected by stavudine according to RNA-seq.
WBGene00014252	19008.6	0.650138	0.128985	5.04041	4.65e-07	4.25e-05	4.37161	ZK1320.2	Involved in innate immune response.	Enriched in intestine, pharyngeal muscle cell, PVD, OLL and head mesodermal cell according to SAGE analysis, tiling array, RNA-seq and microarray. Affected by rde-4, zfp-1, cyc-1, ung-1, atfs-1, spg-7, nhr-114, prg-1, clk-1, set-2, tdp-1, aak-2, crtc-1, glp-1, elt-2, npr-1, rbr-2, chd-3, let-418, dpy-21, glh-4, glh-1, pgl-1, pgl-3, hrde-1, vit-2, emb-4, sta-1, sma-2, sma-4, lin-22, mir-71, elt-7,…
WBGene00018523	421.92	0.649934	0.11563	5.62082	1.9e-08	3.17e-06	5.49894	lact-1	Enriched in several structures, including cephalic sheath cell\; head mesodermal cell\; muscle cell\; neurons\; and ventral nerve cord based on tiling array\; RNA-seq\; and microarray studies. Is affected by several genes including daf-16\; daf-2\; and glp-1 based on microarray\; tiling array\; RNA-seq\; and proteomic studies. Is affected by thirteen chemicals including Tunicamycin\; D-glucose\; …	Enriched in DA neuron, VA neuron, neuron, body wall muscle cell, cephalic sheath cell, GABAergic neuron, ventral nerve cord, muscle cell, intestine, head mesodermal cell, sensory neuron, AQR, PQR and VA12 according to tiling array, RNA-seq and microarray. Affected by cyc-1, ets-4, daf-12, daf-2, elt-2, jmjd-1.2, dop-1, hyl-2, hsf-1, daf-16, dpy-21, cox-5B, glp-1, glh-4, glh-1, pgl-1, pgl-3, vit-2…
WBGene00019121	5156.37	0.649922	0.111448	5.83159	5.49e-09	1.08e-06	5.96658	npl-4.2	Predicted to enable ubiquitin binding activity and ubiquitin protein ligase binding activity. Involved in ER-associated misfolded protein catabolic process and embryo development. Located in nucleus. Part of VCP-NPL4-UFD1 AAA ATPase complex. Is an ortholog of human NPLOC4 (NPL4 homolog, ubiquitin recognition factor).	Enriched in germ line according to RNA-seq. Affected by aak-2, tatn-1, emr-1, lem-2, glp-1, skn-1, daf-16, rpn-10, hsf-1, dep-1, glh-4, glh-1, pgl-1, pgl-3, emb-4, sma-2, sma-4, fbf-2, fbf-1, pfd-6, pals-22, sek-1, set-2, smo-1, sir-2.1 and cep-1 according to RNA-seq, proteomic study and microarray. Affected by rotenone, nicotine, stavudine, Zidovudine, Testosterone, Cry5B, Chlorpyrifos, Diazinon…
WBGene00206354	177.777	0.649916	0.177196	3.66778	0.00024467	0.00477471	2.32105	F27E5.9	Predicted to be located in membrane. Predicted to be integral component of membrane.	Enriched in head mesodermal cell according to RNA-seq. Affected by prg-1, mdt-15, npr-1, hsf-1, mir-60, daf-16, skn-1, hrpr-1, sma-2, sma-4, elt-7, elt-2, nuo-6, flr-4, eat-2, nhl-2, efa-6, ifo-1, hsp-6, sek-1, ceh-60, unc-70, raga-1, nhr-14, sin-3, wdr-5.1, daf-1, ngn-1, malt-1, nfki-1, ilc-17.1, set-2, isp-1, ikb-1, hlh-11, atfs-1, prx-5, nath-10, nhr-49 and daf-18 according to RNA-seq and micr…
WBGene00010196	14744.6	0.64811	0.127471	5.08436	3.69e-07	3.61e-05	4.44249	F57C2.4	Enriched in several structures, including cephalic sheath cell\; dopaminergic neurons\; excretory cell\; germ line\; and spermatheca based on tiling array and RNA-seq studies. Is affected by several genes including daf-16\; daf-2\; and rrf-3 based on microarray\; tiling array\; and RNA-seq studies. Is affected by eighteen chemicals including Heme\; hydrogen sulfide\; and Ethanol based on microarr…	Enriched in cephalic sheath cell, dopaminergic neuron, excretory cell, hypodermis, germ line, hermaphrodite-specific anatomical entity and spermatheca according to tiling array and RNA-seq. Affected by clk-1, cyc-1, sma-2, sma-4, hpl-2, rsr-2, hlh-30, tcer-1, hsf-1, lin-28, cox-5B, mir-34, mafr-1, daf-12, daf-16, glh-4, glh-1, pgl-1, pgl-3, morc-1, nuo-6, hmg-3, thoc-5, eat-2, atfs-1, nhl-2, rrf-…
WBGene00000256	14.6247	0.647798	0.185385	3.49434	0.00047524	0.00749308	2.12534	bli-6	Predicted to be a structural constituent of cuticle. Involved in cuticle development involved in collagen and cuticulin-based cuticle molting cycle. Predicted to be located in membrane. Predicted to be integral component of membrane.	Enriched in hypodermis, neuron, amphid sheath cell and AVK according to tiling array and RNA-seq. Affected by cyc-1, age-1, nhr-49, rsr-2, smgl-1, bar-1, prg-1, aak-2, crtc-1, daf-2, glp-1, npr-1, hsf-1, skn-1, hrpr-1, lin-41, let-7, daf-12, set-4, glh-4, glh-1, pgl-1, pgl-3, hrde-1, morc-1, alg-1, alg-2, emb-4, nrx-1, nlg-1, sma-2, sma-4, lin-22, mir-71, cox-5B, ins-11, set-9, set-26, hpl-2, egl…
WBGene00045171	123.976	0.647702	0.187393	3.45638	0.00054748	0.00812867	2.08998	K09E9.5	Enriched in sensory neurons and somatic gonad precursor based on RNA-seq studies. Is affected by several genes including daf-12\; cep-1\; and prg-1 based on tiling array and RNA-seq studies. Is affected by multi-walled carbon nanotube based on RNA-seq studies.	Enriched in somatic gonad precursor and sensory neuron according to RNA-seq. Affected by daf-12, prg-1, cep-1, hpl-2, hmg-3, dlc-1 and lag-1 according to tiling array and RNA-seq. Affected by multi-walled carbon nanotube according to RNA-seq.
WBGene00010609	44036.8	0.643189	0.113177	5.68305	1.32e-08	2.37e-06	5.62525	dut-1	Predicted to enable dUTP diphosphatase activity and magnesium ion binding activity. Predicted to be involved in dUMP biosynthetic process and dUTP catabolic process. Expressed in intestine. Is an ortholog of human DUT (deoxyuridine triphosphatase).	Enriched in cephalic sheath cell, germline precursor cell, hypodermis, pharyngeal muscle cell, germ line, intestine and head mesodermal cell according to tiling array, RNA-seq and proteomic study. Affected by cyc-1, tatn-1, gld-2, daf-2, jmjd-3.1, hsf-1, cec-4, set-25, met-2, mir-34, mafr-1, glh-4, glh-1, pgl-1, pgl-3, fog-2, emb-4, sma-2, sma-4, smo-1, his-69, his-70, his-72, his-74, his-71, hpl…
WBGene00003183	20762.1	0.642121	0.12103	5.30546	1.12e-07	1.41e-05	4.85078	mei-1	Enables several functions, including ATP binding activity\; MATH domain binding activity\; and microtubule-severing ATPase activity. Involved in several processes, including cytoskeleton organization\; female meiotic nuclear division\; and negative regulation of meiotic spindle elongation. Located in chromatin\; meiotic spindle pole\; and nucleus. Part of katanin complex. Expressed in ciliated ne…	Enriched in germ line according to RNA-seq. Affected by daf-12, tatn-1, lem-2, emr-1, bar-1, hsf-1, mir-34, mafr-1, glh-4, glh-1, pgl-1, pgl-3, emb-4, sma-2, sma-4, nhl-2, pals-22, mina-1, sek-1, aak-1, aak-2, sin-3, sftb-1, anp-1, mrps-5, srbc-48, bcat-1, hlh-11, atfs-1, spr-1, nath-10, sir-2.1, dpy-9, dpy-10, fbf-1, mir-243, isp-1 and nuo-6 according to tiling array, RNA-seq and microarray. Aff…
WBGene00013552	29575.9	0.638925	0.118877	5.37467	7.67e-08	1e-05	5	gmn-1	Enables DNA-binding transcription factor binding activity. Involved in negative regulation of DNA replication and negative regulation of cell cycle.	Enriched in body wall muscle cell, pharyngeal muscle cell and germ line according to tiling array and RNA-seq. Affected by isp-1, aak-2, hpl-2, tatn-1, prg-1, gld-2, daf-2, crtc-1, lin-35, fog-3, jmjd-3.1, hsf-1, cec-4, set-25, met-2, mir-34, glh-4, glh-1, pgl-1, pgl-3, fog-2, emb-4, sma-2, sma-4, lin-22, nuo-6, dlc-1, nhl-2, pals-22, ints-5, aak-1, spc-1, unc-70, mex-1, mex-3, sin-3, mrps-5, srb…
WBGene00004322	13234.5	0.637629	0.107811	5.9143	3.33e-09	6.96e-07	6.15739	rcq-5	Predicted to enable 3'-5' DNA helicase activity and four-way junction helicase activity. Predicted to be involved in DNA unwinding involved in DNA replication and double-strand break repair via homologous recombination. Located in nucleus. Expressed in several structures, including germ line\; intestinal cell\; and oocyte. Is an ortholog of human RECQL5 (RecQ like helicase 5).	Enriched in AVA, body wall muscle cell, germ line and germline precursor cell according to tiling array and RNA-seq. Affected by cox-5B, hsf-1, sma-4, daf-2, isp-1, nuo-6, damt-1, pals-22, sek-1, srbc-48, ikb-1, nfki-1, hlh-11, swsn-1, unc-30 and fbf-1 according to RNA-seq and microarray. Affected by rotenone, D-glucose, stavudine, Zidovudine, metformin, Sirolimus, antimycin, Humic Substances and…
WBGene00021948	1052.57	0.637451	0.0968358	6.5828	4.62e-11	1.75e-08	7.75696	kvs-5	Predicted to enable delayed rectifier potassium channel activity. Predicted to be involved in potassium ion transmembrane transport. Located in plasma membrane. Predicted to be part of voltage-gated potassium channel complex. Is an ortholog of human KCNF1 (potassium voltage-gated channel modifier subfamily F member 1).	Enriched in PVD, OLL, body wall muscle cell, dopaminergic neuron, sensory neuron, PQR, PVN and muscle cell according to microarray, tiling array and RNA-seq. Affected by cyc-1, nhr-49, rsr-2, smgl-1, emr-1, skn-1, daf-16, rsks-1, jmjd-3.1, jmjd-1.2, dop-1, hyl-2, chd-3, let-418, mir-34, glh-4, glh-1, pgl-1, pgl-3, alg-1, emb-4, sid-3, sma-2, lin-22, daf-2, hpl-2, pmt-2, nhl-2, pals-22, atf-7, pmk…
WBGene00000785	7243.05	0.634224	0.135066	4.69566	2.66e-06	0.00016464	3.78346	cpr-5	Predicted to enable cysteine-type endopeptidase activity. Predicted to be involved in proteolysis involved in cellular protein catabolic process. Predicted to be located in extracellular space and lysosome. Human ortholog(s) of this gene implicated in several diseases, including autoimmune disease of the nervous system (multiple)\; carcinoma (multiple)\; and type 2 diabetes mellitus. Is an orthol…	Enriched in PVD, OLL and intestine according to microarray, tiling array and RNA-seq. Affected by daf-2, isp-1, lin-15B, wdr-23, smg-2, smgl-1, daf-16, pgrn-1, tatn-1, ZK1236.1, wrn-1, tdp-1, glp-1, plep-1, mdt-15, elt-2, npr-1, jmjd-3.1, dop-1, hsf-1, chd-3, let-418, mir-34, hrpr-1, daf-12, dpy-21, glh-4, glh-1, pgl-1, pgl-3, ash-2, hrde-1, morc-1, emb-4, cox-5B, elt-7, smo-1, flr-4, thoc-5, eat…
WBGene00008142	86.7517	0.632659	0.173961	3.63678	0.00027607	0.00512501	2.29031	C47E8.3	Predicted to enable G protein-coupled receptor activity. Predicted to be involved in G protein-coupled receptor signaling pathway. Predicted to be located in membrane. Predicted to be integral component of membrane.	Enriched in DA neuron, VA neuron, neuron, AVG, RIM, PVC, AVA, AVD, AVE, RIS, sensory neuron, I5 neuron, M4 neuron, PVN, RIB, SAB and retrovesicular ganglion according to tiling array, RNA-seq and microarray. Affected by daf-12, rsr-2, smgl-1, mir-34, glh-4, glh-1, pgl-1, pgl-3, sma-2, sma-4, smg-2, alg-1, eat-2, sek-1, aak-1, aak-2, unc-70, wdr-5.1, srbc-48, isp-1, atfs-1, unc-30, hda-1, ain-1, a…
WBGene00010597	2703.29	0.631606	0.134076	4.7108	2.47e-06	0.00015534	3.80872	K06A4.7	Enriched in intestine based on RNA-seq and microarray studies. Is affected by several genes including daf-2\; skn-1\; and age-1 based on microarray and RNA-seq studies. Is affected by fourteen chemicals including 1-methylnicotinamide\; methylmercuric chloride\; and rotenone based on RNA-seq and microarray studies.	Enriched in intestine according to RNA-seq and microarray. Affected by cyc-1, isp-1, age-1, nhr-8, prg-1, elt-2, daf-2, npr-1, cox-5B, jmjd-1.2, hyl-2, hsf-1, rbr-2, chd-3, let-418, lin-28, skn-1, mir-34, glh-4, glh-1, pgl-1, pgl-3, morc-1, vit-2, alg-1, emb-4, sma-2, sma-4, clk-1, nuo-6, ints-2, sek-1, nmad-1, mex-1, mex-3, sin-3, spn-4, wdr-5.1, sftb-1, mrps-5, stt-3, srbc-48, rnp-6, set-2, hlh…
WBGene00020562	4896.71	0.631376	0.140133	4.50554	6.62e-06	0.00032074	3.49385	T19C3.4	Predicted to enable microtubule binding activity. Predicted to be involved in endoplasmic reticulum tubular network organization. Predicted to be located in cytoplasmic microtubule\; endoplasmic reticulum membrane\; and endoplasmic reticulum tubular network. Human ortholog(s) of this gene implicated in distal hereditary motor neuronopathy type 5B\; hereditary spastic paraplegia 31\; and hereditar…	Enriched in muscle cell, ASER, PLM, CEPshVR, CEPshVL, CEPshDR, CEPshDL and sensory neuron according to RNA-seq. Affected by cyc-1, daf-12, smgl-1, cox-5B, jmjd-3.1, jmjd-1.2, hlh-30, mir-34, glh-4, glh-1, pgl-1, pgl-3, vit-2, emb-4, sma-2, sma-4, daf-2, nuo-6, pals-22, sek-1, nmad-1, sin-3, egl-43 and alg-1 according to microarray, tiling array and RNA-seq. Affected by Cry5B, stavudine, Rifampin,…
WBGene00008743	83.2886	0.629262	0.180495	3.48631	0.00048974	0.00756455	2.12122	fcmt-1	Predicted to be involved in lipid biosynthetic process.	Enriched in male according to RNA-seq. Affected by wdr-23, eat-2, alg-3, alg-4, clk-1, csr-1, glh-4, glh-1, pgl-1, pgl-3, daf-2, jmjd-3.1, chd-3, let-418, mir-35, alg-1, alg-2, sma-2, sma-4, lin-22, mir-71, dpy-7, isp-1, set-9, hpl-2, egl-9, hmg-3, pmt-2, fbf-2, fbf-1, pfd-6, damt-1, nhl-2, pals-22, rrf-3, ints-6, aak-1, aak-2, smn-1, nmad-1, spc-1, unc-70, nhr-14, mex-1, mex-3, sin-3, spn-4, skn…
WBGene00020467	8280.21	0.625867	0.124515	5.02645	5e-07	4.5e-05	4.34679	T12F5.2	Predicted to be located in membrane. Predicted to be integral component of membrane.	Enriched in hypodermis, germ line, VC5 and VC4 according to RNA-seq. Affected by cyc-1, eat-2, tatn-1, csr-1, drh-3, glh-4, glh-1, pgl-1, pgl-3, daf-16, npr-1, mir-34, mafr-1, alg-1, emb-4, sma-2, sma-4, lin-22, smg-2, daf-2, nuo-6, uaf-1, pmt-2, pry-1, pfd-6, damt-1, atfs-1, hsp-6, aak-1, aak-2, spc-1, sin-3, wdr-23, unc-30, sir-2.1, rde-4, ain-1, ain-2, dpy-10, fbf-1, mir-243 and tbx-2 accordin…
WBGene00003504	26519.4	0.624619	0.0930125	6.71543	1.88e-11	7.5e-09	8.12494	mut-7	Predicted to enable 3'-5'-exoribonuclease activity involved in mature miRNA 3'-end processing. Involved in RNA interference\; negative regulation of transposition, DNA-mediated\; and olfactory learning. Located in cytosol\; mutator focus\; and nucleus. Expressed in AWCL\; AWCR\; and somatic cell. Is an ortholog of human EXD3 (exonuclease 3'-5' domain containing 3).	Enriched in germ line, PVD, OLL, germline precursor cell and somatic gonad precursor according to proteomic study, microarray and RNA-seq. Affected by daf-12, nhr-114, tatn-1, drh-3, gld-2, htz-1, glp-1, skn-1, npr-1, jmjd-3.1, hsf-1, mafr-1, glh-4, glh-1, pgl-1, pgl-3, emb-4, sma-2, sma-4, lin-22, elt-2, elt-7, daf-2, nuo-6, thoc-5, dlc-1, eat-2, damt-1, nhl-2, pals-22, sek-1, aak-1, aak-2, spc-…
WBGene00019939	286.028	0.623959	0.154999	4.02556	5.68e-05	0.00160772	2.79379	lips-17	Predicted to enable lipase activity. Predicted to be involved in lipid catabolic process.	Enriched in hypodermis and PLM according to tiling array and RNA-seq. Affected by age-1, daf-16, hpl-2, eat-2, prg-1, clk-1, wrn-1, daf-2, npr-1, jmjd-3.1, jmjd-1.2, blmp-1, mir-34, mir-35, alg-1, alg-2, emb-4, sma-2, sma-4, lin-22, dpy-7, spt-16, pry-1, nhl-2, hsp-6, mdt-15, zip-3, adr-1, unc-70, numr-1, numr-2, ztf-11, mex-3, sin-3, sftb-1, lin-29, pqm-1, hlh-11, nas-38, atfs-1, prx-5, cat-2, t…
WBGene00004896	10385.3	0.622122	0.109084	5.70314	1.18e-08	2.17e-06	5.66354	smu-2	Involved in several processes, including mechanosensory behavior\; nematode larval development\; and regulation of alternative mRNA splicing, via spliceosome. Located in nucleolus. Predicted to be part of spliceosomal complex. Expressed widely. Is an ortholog of human IK (IK cytokine).	Enriched in body wall muscle cell, excretory cell and germ line according to tiling array and RNA-seq. Affected by sma-2, let-7, gld-1, tatn-1, npr-1, jmjd-3.1, unc-75, mir-34, glp-1, glh-4, glh-1, pgl-1, pgl-3, emb-4, sma-4, smg-2, nuo-6, alg-1, pmt-2, damt-1, nhl-2, pals-22, aak-1, aak-2, set-6, baz-2, egl-43, srbc-48, bcat-1, hlh-11, sir-2.1, slr-2, fbf-1, mir-243 and hlh-25 according to micro…
WBGene00018402	97.3069	0.62117	0.174666	3.55632	0.00037608	0.00635166	2.19711	kvs-3	Predicted to enable delayed rectifier potassium channel activity. Predicted to be involved in potassium ion transmembrane transport. Predicted to be integral component of membrane. Predicted to be part of voltage-gated potassium channel complex. Expressed in AVAL\; AVAR\; and nervous system. Is an ortholog of human KCNF1 (potassium voltage-gated channel modifier subfamily F member 1).	Enriched in neuron, ventral nerve cord, NSM, sensory neuron, PVW and RIR according to tiling array and RNA-seq. Affected by cyc-1, smgl-1, csr-1, jmjd-3.1, dpy-21, glh-4, glh-1, pgl-1, pgl-3, sma-2, sma-4, alg-1, adr-1, aak-1, aak-2, mex-1, mex-3, spn-4, wdr-23, srbc-48, set-2, bcat-1, eat-2, unc-30 and nhr-49 according to microarray and RNA-seq. Affected by multi-walled carbon nanotube, Rifampin…
WBGene00044921	306.478	0.620999	0.146545	4.23761	2.26e-05	0.00081944	3.08648	F53C11.9	Predicted to enable serine-type endopeptidase inhibitor activity. Predicted to be involved in negative regulation of endopeptidase activity. Predicted to be located in extracellular region.	Enriched in body wall muscle cell, cephalic sheath cell, dopaminergic neuron, coelomocyte, PDB, DD neuron and VD neuron according to tiling array and RNA-seq. Affected by smgl-1, hlh-30, clk-1, daf-2, daf-16, mir-34, glh-4, glh-1, pgl-1, pgl-3, emb-4, sma-2, sma-4, mir-71, isp-1, nuo-6, pfd-6, damt-1, nhl-2, rrf-3, ints-6, hsp-6, sek-1, nmad-1, spc-1, mex-3, sin-3, spn-4, srbc-48, hira-1, rnp-6, …
WBGene00008535	6368.57	0.61974	0.115095	5.38458	7.26e-08	9.59e-06	5.01818	F02H6.2	Enriched in AB\; germ line\; hypodermis\; and pharyngeal muscle cell based on tiling array and RNA-seq studies. Is affected by several genes including daf-2\; glp-1\; and skn-1 based on microarray\; tiling array\; RNA-seq\; and studies. Is affected by twelve chemicals including D-glucose\; Zidovudine\; and metformin based on RNA-seq and microarray studies. Is predicted to encode a protein with th…	Enriched in hypodermis, pharyngeal muscle cell, germ line and AB according to tiling array and RNA-seq. Affected by cyc-1, sma-2, sma-4, rsr-2, eat-2, lem-2, emr-1, csr-1, puf-8, daf-2, glp-1, skn-1, npr-1, mir-34, glh-4, glh-1, pgl-1, pgl-3, morc-1, emb-4, his-69, his-70, his-72, his-74, his-71, hpl-2, hmg-3, pmt-2, atfs-1, nhl-2, pals-22, rrf-3, hsp-6, mdt-15, aak-1, aak-2, spc-1, iff-1, mex-3,…
WBGene00018398	5054.77	0.619438	0.126023	4.91529	8.87e-07	6.93e-05	4.15927	sptl-2	Predicted to enable serine C-palmitoyltransferase activity. Predicted to be involved in ceramide biosynthetic process and sphingosine biosynthetic process. Predicted to be part of serine C-palmitoyltransferase complex. Human ortholog(s) of this gene implicated in hereditary sensory and autonomic neuropathy type 1C. Is an ortholog of human SPTLC2 (serine palmitoyltransferase long chain base subuni…	Enriched in pharynx, GABAergic neuron, PVD, OLL, intestine, head mesodermal cell and neuron according to microarray and RNA-seq. Affected by rde-4, zfp-1, cyc-1, sma-2, lin-15B, nhr-49, smg-2, let-7, gld-1, ubc-9, wrn-1, htz-1, lin-35, glp-1, ham-3, cox-5B, jmjd-3.1, jmjd-1.2, blmp-1, hsf-1, mir-34, daf-16, glh-4, glh-1, pgl-1, pgl-3, hrde-1, alg-1, sid-3, sta-1, sma-4, elt-2, elt-7, flr-4, eat-2…
WBGene00012131	278.341	0.61736	0.150199	4.11028	3.95e-05	0.00122953	2.91026	T28F3.5	Predicted to enable ATP binding activity and acetyl-CoA carboxylase activity. Predicted to be involved in fatty acid biosynthetic process and malonyl-CoA biosynthetic process. Is an ortholog of human ACACA (acetyl-CoA carboxylase alpha) and ACACB (acetyl-CoA carboxylase beta).	Enriched in body wall muscle cell, neuron, AVK and sensory neuron according to tiling array and RNA-seq. Affected by clk-1, cyc-1, wdr-23, smgl-1, let-7, gld-1, tatn-1, daf-2, swsn-2.2, jmjd-3.1, jmjd-1.2, hsf-1, glh-4, glh-1, pgl-1, pgl-3, emb-4, sma-2, sma-4, lin-22, smg-2, isp-1, nuo-6, set-26, alg-1, dlc-1, pmt-2, atfs-1, pals-22, pals-25, mina-1, rrf-3, hsp-6, hsb-1, aak-1, aak-2, smn-1, nma…
WBGene00018016	18942.5	0.61105	0.112434	5.43474	5.49e-08	7.76e-06	5.11014	lrr-1	Involved in mitotic DNA replication checkpoint signaling. Located in nucleus. Predicted to be part of Cul2-RING ubiquitin ligase complex. Is an ortholog of human LRR1 (leucine rich repeat protein 1).	Enriched in germ line, AFD and germline precursor cell according to RNA-seq. Affected by isp-1, tatn-1, fog-1, fog-3, hsf-1, mir-34, mafr-1, glh-4, glh-1, pgl-1, pgl-3, emb-4, sma-2, sma-4, his-69, his-70, his-72, his-74, his-71, adr-2, damt-1, nhl-2, pals-22, ints-5, hsp-6, aak-1, aak-2, iff-1, sin-3, srbc-48, hira-1, set-2, ikb-1, nfki-1, hlh-11, atfs-1, spr-1, unc-30, sir-2.1, fbf-1, mir-243 a…
WBGene00018384	288.212	0.610895	0.125576	4.86475	1.15e-06	8.53e-05	4.06905	F43C11.7	Predicted to enable zinc ion binding activity. Involved in defense response to Gram-positive bacterium and determination of adult lifespan. Human ortholog(s) of this gene implicated in several diseases, including Henoch-Schoenlein purpura\; Sweet syndrome\; and hematologic cancer (multiple). Is an ortholog of several human genes including MEFV (MEFV innate immuity regulator, pyrin)\; TRIM61 (trip…	Enriched in GABAergic neuron and intestine according to tiling array and RNA-seq. Affected by rheb-1, lin-15B, daf-12, hpl-2, nhr-114, smgl-1, smgl-2, ubc-9, clk-1, daf-2, glp-1, daf-16, swsn-2.2, tcer-1, elt-2, hsf-1, rbr-2, dpy-21, mys-1, mir-34, mafr-1, set-4, glh-4, glh-1, pgl-1, pgl-3, mir-35, ash-2, hrde-1, morc-1, alg-1, alg-2, emb-4, sma-2, sma-4, lin-22, smg-2, elt-7, nhr-49, nuo-6, hsp-…
WBGene00001595	284611	0.609523	0.128541	4.74187	2.12e-06	0.00013603	3.86637	gld-1	Enables mRNA 3'-UTR binding activity\; mRNA 5'-UTR binding activity\; and single-stranded RNA binding activity. Involved in negative regulation of nitrogen compound metabolic process\; oocyte fate determination\; and regulation of reproductive process. Located in P granule and cytosol. Expressed in germ line\; head neurons\; tail neurons\; ventral nerve cord\; and in male. Is an ortholog of human…	Enriched in PVD, OLL, BAG, body wall muscle cell, germline precursor cell, germ line, head mesodermal cell, I5 neuron, DA neuron, SAB, retrovesicular ganglion, hermaphrodite-specific anatomical entity, VA neuron, neuron and muscle cell according to microarray, tiling array and RNA-seq. Affected by hpl-2, spe-44, let-7, gld-1, tatn-1, lem-2, emr-1, drh-3, fbf-1, gld-2, tdp-1, daf-2, fog-3, npr-1, …
WBGene00003812	27719.7	0.608702	0.168535	3.61172	0.00030417	0.00546687	2.26226	nrf-5	Enables phosphatidylserine binding activity. Involved in lipid transport and positive regulation of engulfment of apoptotic cell. Located in extracellular region. Expressed in apoptotic cell\; body wall musculature\; intestine\; and pharyngeal cell.	Enriched in body wall muscle cell, muscle cell, PLM and GABAergic neuron according to tiling array, RNA-seq and microarray. Affected by rde-4, zfp-1, cyc-1, let-7, gld-1, glp-1, daf-16, chd-3, let-418, glh-4, glh-1, pgl-1, pgl-3, fog-2, emb-4, sma-2, sma-4, lin-22, nuo-6, thoc-5, eat-2, nhl-2, pals-22, nmad-1, sin-3, daf-12, skn-1, set-2, spr-1, dpy-10, ash-2 and hlh-29 according to microarray, p…
WBGene00002004	26183.4	0.606925	0.118182	5.13552	2.81e-07	2.92e-05	4.53462	hsf-1	Enables several functions, including DNA-binding transcription factor activity\; calmodulin binding activity\; and promoter-specific chromatin binding activity. Involved in several processes, including ascaroside biosynthetic process\; defense response to other organism\; and positive regulation of metabolic process. Located in chromatin\; cytoplasm\; and nucleus. Expressed in several structures,…	Enriched in germ line according to proteomic study and RNA-seq. Affected by cyc-1, isp-1, daf-12, tatn-1, gld-2, hsf-1, lin-28, morc-1, vgln-1, emb-4, sma-2, sma-4, flr-4, damt-1, nhl-2, pals-22, iff-1, sin-3, set-6, baz-2, egl-43, srbc-48, hlh-11, spr-1, sir-2.1, mut-2, slr-2, dpy-9, dpy-10 and fbf-1 according to microarray, tiling array and RNA-seq. Affected by Alovudine, stavudine, Zidovudine,…
WBGene00009442	7565.22	0.603534	0.104298	5.78665	7.18e-09	1.4e-06	5.85387	F35G12.5	Enriched in NSM\; germ line\; and germline precursor cell based on RNA-seq and tiling array studies. Is affected by several genes including daf-2\; dpy-10\; and hsf-1 based on microarray and RNA-seq studies. Is affected by eight chemicals including manganese chloride\; stavudine\; and Zidovudine based on RNA-seq and microarray studies.	Enriched in germ line, NSM and germline precursor cell according to RNA-seq and tiling array. Affected by spe-44, gld-2, clk-1, hsf-1, mafr-1, glh-4, glh-1, pgl-1, pgl-3, emb-4, elt-2, elt-7, daf-2, isp-1, nuo-6, pfd-6, sek-1, sftb-1, srbc-48, rnp-6, set-2, atfs-1, unc-30, sir-2.1, dpy-9 and dpy-10 according to microarray and RNA-seq. Affected by manganese chloride, stavudine, Zidovudine, allanto…
WBGene00050943	213.539	0.601848	0.158897	3.78766	0.00015207	0.00338497	2.47045	ZC412.10	Enriched in OLL\; PVD\; dopaminergic neurons\; hypodermis\; and in male based on tiling array and RNA-seq studies. Is affected by several genes including skn-1\; rrf-3\; and hsf-1 based on tiling array\; RNA-seq\; microarray\; and studies. Is affected by five chemicals including 1-methylnicotinamide\; Tunicamycin\; and Cry5B based on RNA-seq and microarray studies.	Enriched in dopaminergic neuron, hypodermis, PVD, OLL and male according to tiling array and RNA-seq. Affected by hpl-2, prp-8, rsr-2, eat-2, nhr-62, alg-3, alg-4, bar-1, wrn-1, csr-1, glh-4, glh-1, pgl-1, pgl-3, skn-1, jmjd-3.1, hsf-1, mir-34, hrde-1, alg-1, alg-2, emb-4, sma-2, sma-4, lin-22, isp-1, nuo-6, set-9, egl-9, spt-16, ifo-1, rrf-3, kri-1, spc-1, unc-70, mex-1, mex-3, spn-4, npr-8, mrp…
WBGene00010681	13314	0.601297	0.118603	5.06982	3.98e-07	3.82e-05	4.41794	mak-1	Enables protein kinase activity and protein kinase binding activity. Involved in adult locomotory behavior\; behavioral response to nicotine\; and protein autophosphorylation. Located in A band. Expressed in body wall muscle cell and tail. Human ortholog(s) of this gene implicated in patterned macular dystrophy 3. Is an ortholog of human MAPKAPK2 (MAPK activated protein kinase 2) and MAPKAPK3 (MA…	Enriched in intestine, ASER, muscle cell, body wall musculature and neuron according to Chronogram analysis, RNA-seq and microarray. Affected by alg-1, rde-4, zfp-1, cyc-1, hlh-30, daf-16, aak-2, daf-12, csr-1, clk-1, hsf-1, mir-34, glh-4, glh-1, pgl-1, pgl-3, emb-4, sma-2, sma-4, lin-22, daf-2, thoc-5, pmt-2, atfs-1, nuo-6, nhl-2, pals-22, atf-7, pmk-1, ints-6, aak-1, smn-1, mex-1, mex-3, set-2,…
WBGene00022642	21244.7	0.600331	0.1113	5.39382	6.9e-08	9.38e-06	5.0278	lipl-5	Predicted to enable hydrolase activity, acting on ester bonds. Involved in defense response to Gram-negative bacterium\; lipid homeostasis\; and triglyceride catabolic process. Located in lysosome. Expressed in coelomocyte and intestine. Human ortholog(s) of this gene implicated in Wolman disease\; autosomal recessive congenital ichthyosis 8\; and cholesterol ester storage disease. Is an ortholog…	Enriched in intestine, pharyngeal muscle cell, head mesodermal cell, I5 neuron, DA neuron, SAB, retrovesicular ganglion and VA neuron according to tiling array, RNA-seq and microarray. Affected by clk-1, isp-1, lin-15B, smgl-1, nhr-8, bar-1, prg-1, wrn-1, aak-2, crtc-1, daf-2, daf-16, elt-2, npr-1, cox-5B, hsf-1, rbr-2, chd-3, let-418, dpy-27, glh-4, glh-1, pgl-1, pgl-3, hrde-1, vit-2, alg-2, emb…
WBGene00003474	432.063	0.598041	0.132363	4.51817	6.24e-06	0.00030969	3.50907	mtl-2	Enables cadmium ion binding activity and zinc ion binding activity. Involved in response to cadmium ion and response to heat. Expressed in intestinal cell and intestine.	Enriched in intestine, AFD, ASER, PLM, M4 neuron and male-specific anatomical entity according to tiling array, RNA-seq and microarray. Affected by cyc-1, aak-2, lin-15B, lin-35, hpl-2, smgl-1, nhr-8, eat-2, prg-1, daf-2, glp-1, tcer-1, elt-2, npr-1, jmjd-3.1, hsf-1, rbr-2, chd-3, flp-6, lin-28, skn-1, glh-4, glh-1, pgl-1, pgl-3, morc-1, alg-1, emb-4, sma-2, sma-4, lin-22, his-3, elt-7, egl-9, pm…
WBGene00000263	5271.86	0.596647	0.114054	5.23128	1.68e-07	1.92e-05	4.7167	F23H11.5	Predicted to be located in membrane. Predicted to be integral component of membrane. Expressed in hypodermis\; intestine\; and pharyngeal muscle cell.	Enriched in NSM, distal tip cell, gonadal sheath cell, spermatheca, intestine and neuron according to RNA-seq and microarray. Affected by cyc-1, aak-2, let-7, gld-1, alg-3, alg-4, prg-1, cox-5B, jmjd-3.1, jmjd-1.2, morc-1, emb-4, daf-2, nuo-6, unc-30, sir-2.1, daf-16, cdk-4 and cyd-1 according to microarray, RNA-seq and proteomic study. Affected by rotenone, D-glucose, Rifampin, allantoin, Choles…
WBGene00000875	17254.7	0.596349	0.166278	3.58645	0.00033521	0.00586657	2.23162	cyk-4	Enables GTPase activator activity. Involved in cytoskeleton-dependent cytokinesis\; mitotic spindle midzone assembly\; and positive regulation of GTPase activity. Located in mitotic spindle midzone and plasma membrane. Part of centralspindlin complex. Expressed in germ cell\; gonad\; and tail. Is an ortholog of human RACGAP1 (Rac GTPase activating protein 1).	Enriched in germ line according to proteomic study and RNA-seq. Affected by cyc-1, lin-35, tatn-1, lem-2, emr-1, prg-1, tdp-1, htz-1, fog-3, hsf-1, lmn-1, cec-4, mir-34, mafr-1, glh-4, glh-1, pgl-1, pgl-3, morc-1, pig-1, emb-4, sma-2, sma-4, adr-2, pry-1, damt-1, nhl-2, pals-22, atf-7, pmk-1, hsp-6, sek-1, aak-1, aak-2, spc-1, unc-70, egl-43, srbc-48, set-2, bcat-1, hlh-11, atfs-1, sir-2.1, lin-1…
WBGene00021590	297.438	0.587772	0.147842	3.97568	7.02e-05	0.00189601	2.72216	Y46D2A.2	Enriched in AFD\; OLL\; PVD\; head mesodermal cell\; and intestine based on microarray\; tiling array\; and RNA-seq studies. Is affected by several genes including daf-16\; daf-2\; and elt-2 based on microarray\; RNA-seq\; and studies. Is affected by sixteen chemicals including Heme\; rotenone\; and D-glucopyranose based on microarray and RNA-seq studies. Is predicted to encode a protein with the…	Enriched in PVD, OLL, intestine, AFD and head mesodermal cell according to microarray, tiling array and RNA-seq. Affected by cyc-1, rsks-1, daf-2, clk-1, mdt-15, daf-16, npr-1, cox-5B, jmjd-3.1, jmjd-1.2, hyl-2, chd-3, let-418, mir-34, glh-4, glh-1, pgl-1, pgl-3, emb-4, sid-3, sta-1, sma-2, sma-4, lin-22, elt-2, elt-7, ins-11, hpl-2, egl-9, pmt-2, nhl-2, pals-22, ifo-1, pmk-1, aak-1, aak-2, nmad-…
WBGene00017708	6800.2	0.584051	0.125215	4.66439	3.1e-06	0.00018668	3.7289	F22E5.9	Predicted to be located in membrane. Predicted to be integral component of membrane. Expressed in several structures, including intestine.	Enriched in body wall muscle cell, germline precursor cell, germ line, seam cell and muscle cell according to tiling array, RNA-seq and microarray. Affected by cyc-1, isp-1, tatn-1, gld-2, jmjd-3.1, mir-34, elli-1, glh-4, glh-1, pgl-1, pgl-3, sma-4, alg-1, aak-1, aak-2, mex-1, mex-3, sin-3, cfp-1, olrn-1, set-2, hlh-11, atfs-1, let-418, spr-1, sir-2.1 and fbf-1 according to microarray and RNA-seq…
WBGene00003752	686.372	0.582689	0.0981116	5.93905	2.87e-09	6.18e-07	6.20901	nlp-14	Predicted to enable neuropeptide hormone activity. Involved in cellular response to carbon dioxide and negative regulation of pharyngeal pumping. Expressed in neurons and in male.	Enriched in DA neuron, VA neuron, BAG, dopaminergic neuron, ventral nerve cord, FLP, neuron, sensory neuron, ADL, AIY, ALA, ASH, ASI, AVF, AVH, AVJ, DVA, PHA, PVM, PVP, PVQ and RID according to tiling array, microarray and RNA-seq. Affected by rde-4, cyc-1, lin-39, hpl-2, wdr-23, tatn-1, clk-1, daf-2, glp-1, cox-5B, jmjd-3.1, jmjd-1.2, hsf-1, chd-3, let-418, dpy-21, elli-1, glh-4, glh-1, pgl-1, p…
WBGene00019439	558.049	0.581322	0.142164	4.0891	4.33e-05	0.00132674	2.87721	K06B9.2	Enriched in germ line based on RNA-seq studies. Is affected by several genes including daf-16\; daf-2\; and hsf-1 based on microarray and RNA-seq studies. Is affected by four chemicals including allantoin\; Sirolimus\; and Rifampin based on RNA-seq studies. Human UAP1 enables identical protein binding activity. Is an ortholog of human UAP1 (UDP-N-acetylglucosamine pyrophosphorylase 1) and UAP1L1 …	Enriched in germ line according to RNA-seq. Affected by lin-35, aak-2, daf-16, hsf-1, chd-3, let-418, mir-34, glh-4, glh-1, pgl-1, pgl-3, emb-4, smg-2, mir-71, daf-2, isp-1, nuo-6, dlc-1, eat-2, nhl-2, sek-1, meg-3, meg-4, raga-1, mex-3, wdr-5.1, henn-1, mut-16, simr-1, set-2, sir-2.1 and mir-243 according to microarray and RNA-seq. Affected by allantoin, Sirolimus, Rifampin and cholesterol accor…
WBGene00021024	5803.52	0.580734	0.110635	5.24911	1.53e-07	1.81e-05	4.74232	W04C9.2	Predicted to be involved in cristae formation. Predicted to be located in mitochondrial crista junction. Predicted to be part of MICOS complex. Human ortholog(s) of this gene implicated in combined oxidative phosphorylation deficiency 37. Is an ortholog of human MICOS13 (mitochondrial contact site and cristae organizing system subunit 13).	Enriched in germ line, hypodermis, NSM, ASER, germline precursor cell and intestine according to proteomic study, tiling array, RNA-seq and microarray. Affected by age-1, sma-2, aak-2, daf-16, npr-1, jmjd-3.1, blmp-1, mir-34, sma-4, smo-1, daf-2, nuo-6, atfs-1, ints-5, sin-3, set-6, baz-2, egl-43, sir-2.1 and gld-1 according to microarray, RNA-seq and proteomic study. Affected by rotenone, Rifamp…
WBGene00015183	186.204	0.580628	0.168832	3.43908	0.00058369	0.00837327	2.0771	B0432.1	Predicted to be located in membrane. Predicted to be integral component of membrane.	Enriched in germ line, sensory neuron and AWA according to RNA-seq. Affected by clk-1, let-418, lin-22, hmg-3, daf-2, nhl-2, mex-1, mex-3, spn-4, sin-3, wdr-5.1, pqm-1, nfki-1, swsn-1, hda-1, mep-1, sir-2.1, isp-1, nuo-6, lin-35 and hsp-6 according to microarray and RNA-seq. Affected by Alovudine, stavudine, Psoralens, allantoin, metformin, Sirolimus, Rifampin, Atrazine, Diazinon and adsorbable o…
WBGene00022222	637.507	0.579346	0.115008	5.03745	4.72e-07	4.29e-05	4.36754	Y73B3A.21	Is affected by several genes including hsf-1\; eat-2\; and pgl-1 based on tiling array\; RNA-seq\; and microarray studies. Is affected by nine chemicals including Alovudine\; Psoralens\; and allantoin based on RNA-seq and microarray studies.	Affected by hpl-2, drh-3, hsf-1, glh-4, glh-1, pgl-1, pgl-3, hrde-1, smg-2, adr-2, eat-2, pmt-2, mex-1, daf-3, mut-16, simr-1, set-2, atfs-1, let-418, unc-30 and fbf-1 according to tiling array, RNA-seq and microarray. Affected by Alovudine, Psoralens, allantoin, Sirolimus, metformin, Rifampin, Atrazine, fluoranthene and Colistin according to RNA-seq and microarray.
WBGene00012662	485.489	0.578974	0.126517	4.57626	4.73e-06	0.00024637	3.60841	Y39A1C.1	Located in striated muscle dense body. Expressed in nerve ring. Human ortholog(s) of this gene implicated in autosomal recessive nonsyndromic deafness 6 and sensorineural hearing loss. Is an ortholog of human TMIE (transmembrane inner ear).	Enriched in PVD, OLL, DA neuron, VA neuron, muscle cell, head mesodermal cell, AVG, OLQ, PHC and neuron according to microarray, tiling array and RNA-seq. Affected by csr-1, cox-5B, jmjd-3.1, mir-34, sma-4, adr-2, eat-2, nhl-2, mex-1, mex-3, sin-3, spn-4, set-2, malt-1, nfki-1, ilc-17.1, rnp-6, spr-1, daf-19, tdp-1, alg-1, isp-1 and nuo-6 according to RNA-seq and microarray. Affected by rotenone,…
WBGene00007235	78702.7	0.578435	0.123335	4.68996	2.73e-06	0.00016854	3.7733	ahsa-1	Predicted to enable ATPase activator activity. Predicted to be involved in positive regulation of ATPase activity and protein folding. Predicted to be located in cytosol. Is an ortholog of human AHSA1 (activator of HSP90 ATPase activity 1).	Enriched in PVD, OLL, germ line, somatic gonad precursor and muscle cell according to tiling array, RNA-seq and microarray. Affected by daf-12, K10D11.2, let-7, gld-1, tatn-1, clk-1, jmjd-3.1, hsf-1, glp-1, sma-2, sma-4, lin-22, daf-2, hmg-3, pals-22, smn-1, unc-70, iff-1, sin-3, csr-1, prg-1, egl-43, mut-16, set-2, spr-1, nath-10, smo-1, hda-1, sir-2.1 and nuo-6 according to tiling array, proteo…
WBGene00001455	459.252	0.575083	0.160497	3.58314	0.00033948	0.00591875	2.22777	flp-12	Involved in negative regulation of turning behavior involved in mating. Expressed in nerve ring and neurons.	Enriched in pharynx, GABAergic neuron, PVD, OLL, Psub1, neuron, sensory neuron, BDU, DA9, LUA, PDA, PDE, SDQ, SMB, VA12, DA neuron and VA neuron according to microarray and RNA-seq. Affected by rde-4, zfp-1, cyc-1, lin-39, wdr-23, eat-2, tatn-1, clk-1, ash-2, dpy-21, kgb-1, mir-34, glh-4, glh-1, pgl-1, pgl-3, emb-4, sma-2, sma-4, lin-22, daf-2, isp-1, nuo-6, adr-2, pmt-2, atfs-1, hsp-6, sek-1, ad…
WBGene00022781	41832.7	0.571989	0.103804	5.51029	3.58e-08	5.34e-06	5.27246	pmt-1	Enables phosphoethanolamine N-methyltransferase activity. Involved in multicellular organism reproduction\; nematode larval development\; and phosphatidylcholine biosynthesis from phosphoryl-ethanolamine via N-dimethylethanolamine phosphate and CDP-choline. Predicted to be located in cytosol. Expressed in seam cell. Used to study lipid metabolism disorder.	Enriched in hypodermis, intestine and somatic gonad precursor according to tiling array and RNA-seq. Affected by daf-2, cyc-1, cid-1, aak-2, atx-3, nhr-49, wdr-23, rsr-2, wrn-1, crtc-1, daf-16, cox-5B, jmjd-3.1, jmjd-1.2, dpy-21, mir-34, glh-4, glh-1, pgl-1, pgl-3, emb-4, sma-2, sma-4, thoc-5, eat-2, pmt-2, pry-1, efa-6, atf-7, pmk-1, ints-6, aak-1, nmad-1, sin-3, cfp-1, skn-1, wdr-5.1, mrps-5, s…
WBGene00018932	10780.6	0.569433	0.133261	4.27308	1.93e-05	0.00072562	3.13929	mrpl-2	Predicted to enable RNA binding activity. Predicted to be a structural constituent of ribosome. Predicted to be involved in mitochondrial translation. Predicted to be located in ribosome. Predicted to be part of mitochondrial large ribosomal subunit. Is an ortholog of human MRPL2 (mitochondrial ribosomal protein L2).	Enriched in germ line according to RNA-seq. Affected by alg-1, rde-4, zfp-1, let-7, gld-1, htz-1, swsn-2.2, npr-1, cox-5B, jmjd-3.1, jmjd-1.2, glh-4, glh-1, pgl-1, pgl-3, emb-4, sma-2, sma-4, elt-7, daf-2, iff-1, mrps-5, atp-2, ain-1, ain-2, lin-35 and atfs-1 according to microarray, proteomic study and RNA-seq. Affected by rotenone, Zidovudine, Cry5B, Sirolimus and allantoin according to RNA-seq…
WBGene00003997	1497.39	0.568326	0.105416	5.39129	7e-08	9.38e-06	5.0278	pgp-3	Predicted to enable ATPase-coupled transmembrane transporter activity and efflux transmembrane transporter activity. Involved in defense response to Gram-negative bacterium\; innate immune response\; and stress response to cadmium ion. Located in apical plasma membrane. Expressed in excretory canal\; excretory cell\; intestinal cell\; intestine\; and pharynx. Human ortholog(s) of this gene implic…	Enriched in excretory cell, GABAergic neuron and intestine according to tiling array and RNA-seq. Affected by clk-1, wdr-23, aak-2, crtc-1, daf-2, glp-1, tcer-1, elt-2, jmjd-3.1, jmjd-1.2, hsf-1, mir-60, chd-3, let-418, dpy-21, mir-34, glh-4, glh-1, pgl-1, pgl-3, sma-2, sma-4, lin-22, eat-2, pry-1, pals-22, sek-1, nmad-1, ztf-11, mex-1, mrps-5, daf-1, daf-3, pqm-1, ikb-1, endu-2, hda-1, sir-2.1, …
WBGene00016930	3649.41	0.567013	0.132782	4.27026	1.95e-05	0.00073288	3.13497	madf-6	Enriched in germ line\; germline precursor cell\; and head mesodermal cell based on tiling array and RNA-seq studies. Is affected by several genes including daf-16\; elt-2\; and sir-2.1 based on microarray\; RNA-seq\; and proteomic studies. Is affected by nine chemicals including manganese chloride\; stavudine\; and Zidovudine based on RNA-seq and microarray studies. Is predicted to encode a prot…	Enriched in germline precursor cell, germ line and head mesodermal cell according to tiling array and RNA-seq. Affected by cyc-1, daf-16, nhr-114, tatn-1, drh-3, npr-1, mafr-1, glh-4, glh-1, pgl-1, pgl-3, emb-4, elt-2, elt-7, clk-1, nhl-2, ints-1, aak-1, aak-2, iff-1, mex-3, sin-3, mut-16, srbc-48, set-2, ikb-1, nfki-1, atfs-1, sir-2.1, fbf-1, tdp-1, isp-1 and nuo-6 according to microarray, RNA-s…
WBGene00008682	85767.3	0.566639	0.109732	5.16384	2.42e-07	2.57e-05	4.59007	lex-1	Predicted to enable ATP hydrolysis activity\; chromatin binding activity\; and histone binding activity. Involved in regulation of heterochromatin assembly. Predicted to be located in nucleus. Is an ortholog of human ATAD2 (ATPase family AAA domain containing 2) and ATAD2B (ATPase family AAA domain containing 2B).	Enriched in germ line according to RNA-seq. Affected by lin-15B, daf-12, tatn-1, ZK1236.1, daf-2, hsf-1, mafr-1, glh-4, glh-1, pgl-1, pgl-3, hrde-1, morc-1, pig-1, emb-4, sma-2, sma-4, adr-2, dlc-1, nhl-2, pals-22, hsp-6, sin-3, sftb-1, set-6, baz-2, srbc-48, set-2, ikb-1, nfki-1, bcat-1, hlh-11, atfs-1, spr-1, smo-1, hda-1, dpy-9, dpy-10, fbf-1 and gld-1 according to microarray, tiling array, RN…
WBGene00021917	122.884	0.564978	0.163538	3.45473	0.00055085	0.00815262	2.0887	Y55D5A.3	Predicted to enable fatty acid amide hydrolase activity. Predicted to be involved in N-acylethanolamine metabolic process and fatty acid metabolic process. Predicted to be located in lysosome. Predicted to be extrinsic component of membrane. Is an ortholog of human NAAA (N-acylethanolamine acid amidase).	Enriched in muscle cell according to microarray. Affected by cyc-1, lin-15B, mir-34, glh-4, glh-1, pgl-1, pgl-3, ins-11, hpl-2, eat-2, damt-1, nhl-2, rrf-3, hsp-6, sek-1, unc-70, mex-3, sin-3, spn-4, set-2, srbc-48, hira-1 and spr-1 according to microarray and RNA-seq. Affected by methylmercuric chloride, stavudine, Zidovudine, allantoin, Sirolimus, Rifampin, antimycin and Atrazine according to m…
WBGene00018403	1697.51	0.564606	0.0861877	6.55089	5.72e-11	1.95e-08	7.70997	F44A2.3	Predicted to enable lipid binding activity. Predicted to be located in extracellular space. Expressed in amphid socket cell\; excretory duct\; head\; hypodermis\; and vulva. Human ortholog(s) of this gene implicated in Crohn's disease\; atherosclerosis\; and severe acute respiratory syndrome. Is an ortholog of several human genes including BPI (bactericidal permeability increasing protein)\; BPIF…	Enriched in hypodermis according to RNA-seq. Affected by cyc-1, wdr-23, rsr-2, eat-2, nhr-62, clk-1, wrn-1, tdp-1, daf-2, tcer-1, cox-5B, jmjd-3.1, jmjd-1.2, skn-1, mir-34, daf-12, daf-16, glh-4, glh-1, pgl-1, pgl-3, alg-1, alg-2, sma-2, sma-4, mir-71, elt-2, elt-7, egl-9, hmg-3, pmt-2, pry-1, damt-1, nhl-2, efa-6, nhr-86, ifo-1, ints-5, mdt-15, aak-1, aak-2, adr-1, adr-2, spc-1, mex-1, mex-3, sp…
WBGene00014207	4744.67	0.564384	0.136299	4.1408	3.46e-05	0.00111654	2.95213	ZK1058.9	Enriched in body wall muscle cell\; germ line\; and muscle cell based on tiling array\; proteomic\; RNA-seq\; and microarray studies. Is affected by several genes including daf-16\; glp-1\; and daf-12 based on tiling array\; microarray\; RNA-seq\; and proteomic studies. Is affected by seventeen chemicals including methylmercuric chloride\; rotenone\; and D-glucose based on microarray and RNA-seq …	Enriched in body wall muscle cell, germ line and muscle cell according to tiling array, proteomic study, RNA-seq and microarray. Affected by daf-12, clk-1, wrn-1, glp-1, npr-1, jmjd-3.1, jmjd-1.2, rbr-2, mes-2, mes-6, mir-34, daf-16, glh-4, glh-1, pgl-1, pgl-3, sma-2, sma-4, nuo-6, damt-1, nhl-2, pals-22, aak-1, aak-2, smn-1, tofu-6, nmad-1, ztf-11, mex-1, mex-3, sin-3, spn-4, csr-1, wdr-23, mut-…
WBGene00017772	10955.2	0.563363	0.088981	6.33128	2.43e-10	7.01e-08	7.15428	clec-1	Predicted to enable carbohydrate binding activity. Predicted to be located in external side of plasma membrane.	Enriched in germ line, hypodermis and intestine according to proteomic study, tiling array and microarray. Affected by hda-1, zfp-1, clk-1, cyc-1, cid-1, daf-16, hpl-2, nhr-8, pgrn-1, daf-2, npr-1, mir-60, lmn-1, cec-4, mir-34, daf-12, glh-4, glh-1, pgl-1, pgl-3, mir-35, emb-4, sma-2, sma-4, lin-22, thoc-5, eat-2, pry-1, nhl-2, efa-6, ifo-1, rrf-3, ints-1, hsp-6, mdt-15, nmad-1, mex-1, sin-3, mrp…
WBGene00010747	245.43	0.562222	0.159906	3.51594	0.0004382	0.00710095	2.14868	K10D11.3	Enriched in OLL\; PVD\; and intestine based on microarray\; tiling array\; and RNA-seq studies. Is affected by several genes including daf-16\; hsf-1\; and elt-2 based on microarray and RNA-seq studies. Is affected by twelve chemicals including rotenone\; multi-walled carbon nanotube\; and D-glucose based on RNA-seq and microarray studies. Is predicted to encode a protein with the following domai…	Enriched in PVD, OLL and intestine according to microarray, tiling array and RNA-seq. Affected by cyc-1, lin-15B, wdr-23, smg-2, smgl-1, nhr-8, csr-1, npr-1, hyl-2, hsf-1, mir-34, hrde-1, sid-3, sta-1, adr-2, sma-2, sma-4, his-3, elt-7, elt-2, nuo-6, hmg-3, flr-4, eat-2, pry-1, atfs-1, hif-1, nhl-2, nhr-86, ifo-1, atf-7, pmk-1, hsp-6, aak-1, aak-2, ceh-60, kri-1, smn-1, nmad-1, ints-4, nhr-14, me…
WBGene00000284	157.226	0.561705	0.163722	3.43084	0.00060171	0.00858764	2.06613	cah-6	Predicted to enable carbonate dehydratase activity. Predicted to be involved in one-carbon metabolic process. Predicted to be located in cytoplasm. Expressed in head neurons\; nervous system\; and tail neurons. Human ortholog(s) of this gene implicated in cerebellar ataxia, mental retardation and dysequlibrium syndrome. Is an ortholog of human CA8 (carbonic anhydrase 8).	Enriched in GABAergic neuron, DA neuron, VA neuron, neuron, AVE, dopaminergic neuron, ventral nerve cord, NSM, HOB, IL2 neuron, CEM, ray neuron type B, male, AFD, head mesodermal cell, RIS, sensory neuron, ALN, I1 neuron, IL2VR, IL2VL, IL2DR, IL2DL, IL2R, IL2L, PDA, PDB, PDE, PVP, RIH, URB and DD neuron according to microarray, tiling array and RNA-seq. Affected by ubc-9, wrn-1, daf-2, glp-1, chd…
WBGene00013080	1762.38	0.56062	0.12854	4.36145	1.29e-05	0.00053048	3.27533	Y51A2D.13	Predicted to enable catalytic activity. Predicted to be located in membrane. Predicted to be integral component of membrane. Human ortholog(s) of this gene implicated in spinocerebellar ataxia 46. Is an ortholog of human PLD3 (phospholipase D family member 3)\; PLD4 (phospholipase D family member 4)\; and PLD5 (phospholipase D family member 5).	Enriched in intestine, muscle cell and head mesodermal cell according to tiling array, RNA-seq and microarray. Affected by cyc-1, age-1, rsr-2, smgl-1, eat-2, aak-2, crtc-1, glh-4, glh-1, pgl-1, pgl-3, elt-2, daf-2, npr-1, hsf-1, rbr-2, chd-3, let-418, dpy-21, mir-34, daf-12, daf-16, mir-35, alg-1, alg-2, alg-5, emb-4, sma-2, sma-4, lin-22, smg-1, elt-7, nhr-49, nuo-6, flr-4, pry-1, damt-1, nhl-2…
WBGene00011934	153.778	0.560552	0.155257	3.61049	0.00030562	0.00548088	2.26115	T22H2.4	Enriched in body wall muscle cell\; body wall musculature\; and muscle cell based on tiling array and microarray studies. Is affected by several genes including daf-16\; sir-2.1\; and pgl-1 based on tiling array\; RNA-seq\; and microarray studies. Is affected by five chemicals including Rifampin\; Sirolimus\; and Atrazine based on RNA-seq and microarray studies.	Enriched in body wall muscle cell, muscle cell and body wall musculature according to tiling array and microarray. Affected by daf-16, lem-2, emr-1, prg-1, mir-34, glh-4, glh-1, pgl-1, pgl-3, set-6, baz-2, sir-2.1, ain-1 and ain-2 according to tiling array, RNA-seq and microarray. Affected by Rifampin, Sirolimus, Atrazine, Humic Substances and copper sulfate according to RNA-seq and microarray.
WBGene00008132	21069	0.558587	0.113894	4.90446	9.37e-07	7.29e-05	4.13727	gale-1	Enables UDP-N-acetylglucosamine 4-epimerase activity and UDP-glucose 4-epimerase activity. Involved in several processes, including defense response to Gram-positive bacterium\; gonad morphogenesis\; and positive regulation of vulval development. Predicted to be located in cytosol. Expressed in head. Used to study galactosemia. Human ortholog(s) of this gene implicated in galactose epimerase defi…	Enriched in germline precursor cell, germ line, somatic gonad precursor, BAG and gonadal sheath cell according to tiling array and RNA-seq. Affected by cyc-1, K10D11.2, wdr-23, smgl-1, daf-16, emr-1, gld-2, clk-1, tdp-1, mdt-15, daf-2, jmjd-3.1, hyl-2, rbr-2, dpy-21, ash-2, vit-2, alg-1, alg-2, emb-4, sma-2, sma-4, smo-1, flr-4, nhl-2, pals-22, efa-6, ifo-1, atf-7, pmk-1, aak-1, aak-2, kri-1, smn…
WBGene00010484	4317.58	0.552417	0.133888	4.12595	3.69e-05	0.00116426	2.93395	dph-3	Predicted to enable metal ion binding activity. Predicted to be involved in peptidyl-diphthamide biosynthetic process from peptidyl-histidine and tRNA wobble uridine modification. Located in nucleus. Is an ortholog of human DPH3 (diphthamide biosynthesis 3).	Enriched in germ line and somatic gonad precursor according to RNA-seq. Affected by cyc-1, age-1, egl-5, aak-2, unc-120, smg-2, lem-2, emr-1, daf-16, cox-5B, jmjd-3.1, jmjd-1.2, mir-34, glh-4, glh-1, pgl-1, pgl-3, emb-4, sma-4, spc-1, unc-70, iff-1, cfp-1, sin-3, sftb-1, spr-1, unc-30, sir-2.1, ain-2, lin-54, tdp-1, tbx-2, isp-1, nuo-6 and hlh-25 according to microarray and RNA-seq. Affected by r…
WBGene00016417	206.202	0.552061	0.148565	3.71596	0.00020243	0.00419267	2.37751	C34F11.8	Enriched in FLP and hypodermis based on microarray and RNA-seq studies. Is affected by several genes including daf-16\; daf-2\; and rrf-3 based on microarray and RNA-seq studies. Is affected by eighteen chemicals including rotenone\; 4-bromodiphenyl ether\; and Ag nanoparticles based on RNA-seq and microarray studies.	Enriched in FLP and hypodermis according to microarray and RNA-seq. Affected by alg-1, rde-4, zfp-1, isp-1, wdr-23, smg-2, blmp-1, clk-1, wrn-1, elt-2, dpy-21, mir-34, daf-12, daf-16, glh-4, glh-1, pgl-1, pgl-3, mir-35, emb-4, sma-2, sma-4, mir-71, cox-5B, his-3, dpy-7, daf-2, nuo-6, set-9, hpl-2, hmg-3, hmg-4, spt-16, thoc-5, eat-2, pmt-2, damt-1, atfs-1, mina-1, rrf-3, rpl-33, rpl-5, aak-1, aak…
WBGene00002084	150.004	0.551981	0.15743	3.50619	0.00045457	0.00726532	2.13875	ins-1	Predicted to enable hormone activity. Involved in several processes, including learning or memory\; negative regulation of insulin receptor signaling pathway\; and regulation of dauer entry. Located in several cellular components, including cytoplasmic vesicle\; neuron projection\; and neuronal cell body. Expressed in several structures, including distal tip cell\; egg-laying apparatus\; head mus…	Enriched in DA neuron, VA neuron, neuron, BAG, ventral nerve cord, NSM, sensory neuron, AIA, AIM, AIN, AIZ, ASJ, I5 neuron, IL2R, IL2L, PVW, RID, SAB and retrovesicular ganglion according to tiling array, RNA-seq and microarray. Affected by glh-4, glh-1, pgl-1, pgl-3, sma-2, sma-4, daf-2, nuo-6, alg-1, eat-2, pry-1, nhl-2, ints-1, unc-70, numr-1, numr-2, mex-1, mex-3, sin-3, spn-4, srbc-48, set-2…
WBGene00022176	21851.7	0.551773	0.117294	4.70417	2.55e-06	0.00015932	3.79773	Y71H2AM.11	Predicted to enable peptidase activity. Predicted to be involved in proteolysis. Human ortholog(s) of this gene implicated in glomerulonephritis. Is an ortholog of human CNDP2 (carnosine dipeptidase 2).	Enriched in coelomocyte, PVD, OLL, AVK and head mesodermal cell according to tiling array and RNA-seq. Affected by cyc-1, nhr-49, hpl-2, clk-1, npr-1, cox-5B, jmjd-3.1, jmjd-1.2, hsf-1, dpy-21, mir-34, ash-2, sma-2, sma-4, daf-2, isp-1, nuo-6, pmt-2, pals-22, iff-1, sin-3, mrps-5, hlh-11, spr-1, smo-1, slr-2, ahr-1, fbf-1, tax-6 and gei-8 according to microarray, proteomic study, tiling array and…
WBGene00000644	371.425	0.55162	0.144878	3.80748	0.00014039	0.00319607	2.49538	col-68	Predicted to be a structural constituent of cuticle. Predicted to be located in membrane. Predicted to be integral component of membrane.	Enriched in VA12 and male-specific anatomical entity according to RNA-seq and microarray. Affected by age-1, rsr-2, tdp-1, ham-3, npr-1, jmjd-1.2, hsf-1, mir-34, daf-12, daf-16, dpy-21, glh-4, glh-1, pgl-1, pgl-3, lin-22, cox-5B, isp-1, nuo-6, sod-2, hpl-2, hmg-3, hmg-4, eat-2, nhl-2, pals-25, rrf-3, aak-1, aak-2, spc-1, unc-70, ints-4, mdt-15, iff-1, mex-1, mex-3, spn-4, mrps-5, lsm-1, hira-1, s…
WBGene00015346	10029.6	0.551395	0.113344	4.86481	1.15e-06	8.53e-05	4.06905	C02F5.3	Predicted to enable GTP binding activity. Predicted to be involved in cytoplasmic translation. Predicted to be located in cytoplasm. Is an ortholog of human DRG2 (developmentally regulated GTP binding protein 2).	Enriched in PVD, OLL, body wall muscle cell, dopaminergic neuron, hypodermis, muscle cell and germ line according to microarray, tiling array and RNA-seq. Affected by cyc-1, K10D11.2, let-7, gld-1, tatn-1, jmjd-3.1, jmjd-1.2, mir-34, emb-4, smo-1, daf-2, aak-1, aak-2, iff-1, mrps-5, set-2 and sir-2.1 according to microarray, proteomic study and RNA-seq. Affected by Zidovudine, metformin, Sirolimu…
WBGene00000200	31937.7	0.550383	0.107644	5.11297	3.17e-07	3.17e-05	4.49894	arx-2	Predicted to contribute to actin filament binding activity. Involved in Arp2\/3 complex-mediated actin nucleation\; embryonic morphogenesis\; and epithelial cell migration. Predicted to be located in cytoplasm and cytoskeleton. Predicted to be part of Arp2\/3 protein complex. Expressed in Q cell\; anchor cell\; apoptotic cell\; seam cell\; and socket cell. Human ortholog(s) of this gene implicate…	Enriched in germ line according to proteomic study and RNA-seq. Affected by isp-1, aak-2, daf-12, K10D11.2, hsf-1, emb-4, sma-2, sma-4, smo-1, daf-2, sek-1, iff-1, cfp-1, wdr-5.1, meg-3, csr-1, set-6, baz-2, mut-16, sir-2.1, fbf-1 and gld-1 according to microarray, RNA-seq, tiling array and proteomic study. Affected by stavudine, Zidovudine, Cry5B, Hydrolyzable Tannins, Humic Substances and Sirol…
WBGene00006574	10224	0.548869	0.133961	4.09723	4.18e-05	0.00128946	2.88959	tin-13	Predicted to enable metal ion binding activity. Predicted to be involved in protein insertion into mitochondrial inner membrane. Predicted to be located in mitochondrial inner membrane and mitochondrial intermembrane space. Predicted to be part of mitochondrial intermembrane space protein transporter complex. Is an ortholog of human TIMM13 (translocase of inner mitochondrial membrane 13).	Enriched in hypodermis, Psub1, ASER, germ line and intestine according to tiling array, RNA-seq and microarray. Affected by daf-16, aak-2, daf-12, prg-1, tdp-1, htz-1, npr-1, cox-5B, jmjd-3.1, jmjd-1.2, hsf-1, glh-4, glh-1, pgl-1, pgl-3, nlg-1, sma-4, daf-2, pmt-2, damt-1, smn-1, unc-70, sin-3, mrps-5, set-6, baz-2, egl-43, atp-2, unc-30, sir-2.1, lin-14, lin-4 and gei-8 according to tiling array…
WBGene00017077	1854.41	0.545151	0.126571	4.30707	1.65e-05	0.00064119	3.19301	D2096.10	Enriched in germ line\; head mesodermal cell\; hypodermis\; neurons\; and in male based on microarray\; tiling array\; and RNA-seq studies. Is affected by several genes including daf-16\; daf-12\; and eat-2 based on RNA-seq\; microarray\; and tiling array studies. Is affected by eight chemicals including mianserin\; sesamin\; and Psoralens based on RNA-seq and microarray studies. Is predicted to …	Enriched in PVD, OLL, AVA, hypodermis, male, AFD, ASER, germ line, head mesodermal cell, RIS and neuron according to microarray, tiling array and RNA-seq. Affected by tatn-1, clk-1, lin-35, cox-5B, jmjd-3.1, jmjd-1.2, mes-6, mir-34, daf-12, daf-16, morc-1, sma-4, smg-2, ins-11, flr-4, eat-2, damt-1, zip-3, aak-1, aak-2, unc-70, mex-1, mex-3, spn-4, wdr-5.1, set-2, unc-30, csr-1, sir-2.1 and alg-1…
WBGene00007153	22489.9	0.544849	0.126515	4.3066	1.66e-05	0.00064119	3.19301	clec-41	Predicted to enable carbohydrate binding activity. Involved in positive regulation of chemotaxis.	Enriched in intestine according to tiling array and RNA-seq. Affected by cyc-1, ets-4, sma-2, lin-15B, prp-8, smg-2, smgl-1, daf-2, let-7, gld-1, bar-1, prg-1, clk-1, wrn-1, htz-1, glh-4, glh-1, pgl-1, pgl-3, glp-1, skn-1, mdt-15, daf-16, ham-3, swsn-2.2, npr-1, cox-5B, jmjd-3.1, jmjd-1.2, hyl-2, chd-3, let-418, cec-4, mafr-1, mir-35, hrde-1, alg-1, emb-4, sid-3, sta-1, adr-2, sma-4, lin-22, elt-…
WBGene00019261	8011.88	0.538509	0.111003	4.85129	1.23e-06	8.96e-05	4.04769	H34I24.2	Enriched in OLL\; PVD\; head mesodermal cell\; intestine\; and pharyngeal muscle cell based on microarray\; tiling array\; and RNA-seq studies. Is affected by several genes including daf-16\; daf-2\; and skn-1 based on microarray\; proteomic\; and RNA-seq studies. Is affected by eighteen chemicals including manganese chloride\; mianserin\; and Psoralens based on RNA-seq and microarray studies.	Enriched in PVD, OLL, intestine, pharyngeal muscle cell and head mesodermal cell according to microarray, tiling array and RNA-seq. Affected by cyc-1, lec-6, atfs-1, spg-7, eat-2, bar-1, prg-1, tdp-1, elt-2, daf-2, skn-1, npr-1, jmjd-3.1, jmjd-1.2, hyl-2, chd-3, let-418, daf-16, mir-34, mafr-1, elli-1, glh-4, glh-1, pgl-1, pgl-3, emb-4, sid-3, sta-1, sma-2, sma-4, mir-71, elt-7, nuo-6, alg-1, flr…
WBGene00016790	1984.57	0.538282	0.106406	5.05875	4.22e-07	3.99e-05	4.39903	C49H3.3	Predicted to enable basal RNA polymerase II transcription machinery binding activity. Predicted to be involved in dendrite extension. Predicted to be located in nucleolus. Is an ortholog of human LLPH (LLP homolog, long-term synaptic facilitation factor).	Enriched in AFD, germ line and somatic gonad precursor according to RNA-seq. Affected by tatn-1, clk-1, glp-1, skn-1, jmjd-3.1, hsf-1, daf-16, glh-4, glh-1, pgl-1, pgl-3, sma-2, sma-4, daf-2, isp-1, nuo-6, set-9, pmt-2, aak-1, aak-2, unc-70, sin-3, sftb-1, mrps-5, egl-43, set-2 and gei-8 according to RNA-seq and microarray. Affected by rotenone, stavudine, Rifampin, allantoin, fluoranthene, Cry5B…
WBGene00012732	1943.45	0.538212	0.11031	4.87908	1.07e-06	8.07e-05	4.09313	wac-1.2	Predicted to enable RNA polymerase II complex binding activity and chromatin binding activity. Predicted to be involved in histone monoubiquitination\; positive regulation of TORC1 signaling\; and regulation of autophagy. Predicted to be located in nucleus.	Enriched in germ line and somatic gonad precursor according to RNA-seq. Affected by cgh-1, daf-12, daf-2, jmjd-3.1, sma-2, sma-4, rpl-33, rpl-5, iff-1, set-2, hlh-11, atfs-1 and sir-2.1 according to microarray, tiling array and RNA-seq. Affected by rotenone, stavudine, Rifampin and allantoin according to RNA-seq.
WBGene00007384	710.159	0.53821	0.146021	3.68583	0.00022796	0.00455529	2.34148	swt-3	Predicted to enable sugar transmembrane transporter activity. Predicted to be involved in carbohydrate transport. Predicted to be integral component of membrane. Expressed in Z1\; Z4\; and spermatheca. Is an ortholog of human SLC50A1 (solute carrier family 50 member 1).	Enriched in intestine, hypodermis, hermaphrodite-specific anatomical entity, AFD, ASER, CAN and neuron according to Chronogram analysis, tiling array, RNA-seq and microarray. Affected by clk-1, cyc-1, age-1, pgrn-1, lem-2, emr-1, csr-1, ubc-9, daf-2, glp-1, ham-3, swsn-2.2, cox-5B, dop-1, hyl-2, set-25, met-2, daf-16, skn-1, mir-34, daf-12, dpy-21, glh-4, glh-1, pgl-1, pgl-3, hrde-1, vit-2, vgln-…
WBGene00009048	383.116	0.53776	0.114982	4.67691	2.91e-06	0.00017728	3.75134	cth-1	Predicted to enable cystathionine gamma-lyase activity and pyridoxal phosphate binding activity. Predicted to be involved in cysteine biosynthetic process via cystathionine and transsulfuration. Predicted to be located in cytoplasm. Human ortholog(s) of this gene implicated in cystathioninuria. Is an ortholog of human CTH (cystathionine gamma-lyase).	Enriched in intestine, pharyngeal muscle cell, PVD, OLL and muscle cell according to tiling array, RNA-seq and microarray. Affected by clk-1, age-1, nhr-49, smgl-1, nhr-8, daf-2, lem-2, emr-1, bar-1, ubc-9, lin-35, mdt-15, daf-16, tcer-1, elt-2, jmjd-3.1, dop-1, hyl-2, rbr-2, mir-34, dep-1, elli-1, glh-4, glh-1, pgl-1, pgl-3, mir-35, ash-2, hrde-1, morc-1, emb-4, sta-1, sma-2, sma-4, lin-22, smg-…
WBGene00018802	7528.09	0.537267	0.132576	4.05253	5.07e-05	0.00147792	2.83035	F54D8.6	Expressed in head. Is predicted to encode a protein with the following domain: Phosphorylation site.	Enriched in PVD, OLL, neuron, AVA and germ line according to microarray, tiling array and RNA-seq. Affected by dcr-1, tatn-1, npr-1, jmjd-3.1, jmjd-1.2, hsf-1, emb-4, sma-4, smg-2, flr-4, adr-2, zip-3, sek-1, iff-1, set-6, baz-2, olrn-1, srbc-48, hlh-11, unc-30 and alg-1 according to proteomic study, RNA-seq and microarray. Affected by D-glucose, stavudine, silicon dioxide nanoparticle, Progester…
WBGene00002257	450.483	0.535785	0.120006	4.46465	8.02e-06	0.00037013	3.43165	lbp-5	Enables fatty acid binding activity. Predicted to be involved in fatty acid transport. Located in nucleus and perinuclear region of cytoplasm. Expressed in hypodermis and tail. Human ortholog(s) of this gene implicated in several diseases, including Alzheimer's disease\; Down syndrome\; artery disease (multiple)\; and type 2 diabetes mellitus. Is an ortholog of human FABP3 (fatty acid binding pro…	Enriched in intestine, ASER, head mesodermal cell and gonadal sheath cell according to Chronogram analysis, tiling array and RNA-seq. Affected by cyc-1, cid-1, lin-15B, age-1, hpl-2, eat-2, daf-2, csr-1, daf-16, cox-5B, jmjd-3.1, jmjd-1.2, hsf-1, chd-3, let-418, set-25, met-2, hlh-30, mir-34, glh-4, glh-1, pgl-1, pgl-3, morc-1, pig-1, sma-2, sma-4, lin-22, smo-1, ins-11, egl-9, pmt-2, pry-1, nhl-…
WBGene00013046	206.875	0.535386	0.15205	3.52111	0.00042975	0.00700907	2.15434	Y50E8A.1	Enriched in hypodermis and seam cell based on tiling array and RNA-seq studies. Is affected by several genes including daf-16\; daf-2\; and age-1 based on microarray\; RNA-seq\; and studies. Is affected by twelve chemicals including methylmercuric chloride\; Tunicamycin\; and mianserin based on microarray and RNA-seq studies.	Enriched in hypodermis and seam cell according to tiling array and RNA-seq. Affected by cyc-1, sam-10, age-1, smgl-1, clk-1, daf-2, cox-5B, dop-1, hsf-1, daf-12, daf-16, dpy-21, glh-4, glh-1, pgl-1, pgl-3, sma-2, sma-4, nuo-6, pmt-2, pry-1, nhl-2, efa-6, rrf-3, hsp-6, aak-1, aak-2, kri-1, spc-1, unc-70, mex-3, sin-3, spn-4, set-2, srbc-48, pqm-1, spr-1, fzo-1, sir-2.1, dcr-1 and mir-243 according…
WBGene00009500	770.092	0.53427	0.136812	3.90515	9.42e-05	0.00235433	2.62813	cfh-1	Enriched in amphid sheath cell\; dopaminergic neurons\; and intestine based on Chronogram\; tiling array\; RNA-seq\; and microarray studies. Is affected by several genes including daf-2\; rrf-3\; and daf-12 based on microarray\; tiling array\; RNA-seq\; and studies. Is affected by fourteen chemicals including hydrogen sulfide\; D-glucose\; and stavudine based on microarray and RNA-seq studies. Hu…	Enriched in intestine, dopaminergic neuron, amphid sheath cell and hermaphrodite-specific anatomical entity according to Chronogram analysis, tiling array, RNA-seq and microarray. Affected by clk-1, cyc-1, daf-12, lem-2, emr-1, bar-1, prg-1, wrn-1, daf-2, ham-3, jmjd-3.1, jmjd-1.2, chd-3, let-418, mir-34, glh-4, glh-1, pgl-1, pgl-3, alg-1, alg-2, emb-4, sma-2, sma-4, cox-5B, elt-2, elt-7, dpy-7, …
WBGene00004341	9045.37	0.532277	0.110924	4.79855	1.6e-06	0.00011244	3.94908	rfl-1	Predicted to enable NEDD8 activating enzyme activity. Involved in negative regulation of DNA damage response, signal transduction by p53 class mediator and protein neddylation. Located in cytoplasm and nucleus. Expressed in head\; tail\; and vulval cell. Is an ortholog of human UBA3 (ubiquitin like modifier activating enzyme 3).	Enriched in cephalic sheath cell, germ line, AFD, germline precursor cell, AVK, CEPshVR, CEPshVL, CEPshDR, CEPshDL, LUA, VA12, VB2 and intestine according to tiling array, RNA-seq and microarray. Affected by cyc-1, isp-1, jmjd-3.1, mir-34, glh-4, glh-1, pgl-1, pgl-3, emb-4, sma-4, thoc-5, sek-1, iff-1, egl-43, sir-2.1, ain-2 and fbf-1 according to microarray and RNA-seq. Affected by Zidovudine an…
WBGene00016022	237.782	0.528326	0.154781	3.41337	0.00064164	0.00902878	2.04437	C23H3.9	Enriched in several structures, including head mesodermal cell\; intestine\; neurons\; pharynx\; and ventral nerve cord based on microarray\; tiling array\; and RNA-seq studies. Is affected by several genes including daf-16\; daf-2\; and skn-1 based on microarray\; RNA-seq\; and studies. Is affected by seventeen chemicals including methylmercury hydroxide\; Zidovudine\; and allantoin based on RNA…	Enriched in pharynx, PVD, OLL, AVA, AVE, ventral nerve cord, intestine, AVK, head mesodermal cell, AVJ, RIA, RIV, RMDR, RMDL, SMD, neuron and body wall musculature according to microarray, tiling array and RNA-seq. Affected by clk-1, cyc-1, fer-1, smg-2, bar-1, csr-1, daf-2, ham-3, jmjd-3.1, jmjd-1.2, mir-34, daf-12, daf-16, dpy-21, alg-1, alg-2, sma-2, sma-4, lin-22, dpy-7, skn-1, nuo-6, set-9, …
WBGene00008729	17955.6	0.52825	0.115481	4.57435	4.78e-06	0.0002468	3.60765	F13B12.1	Predicted to be involved in poly(A)+ mRNA export from nucleus. Located in nucleus. Expressed in anal depressor muscle\; head neurons\; pharyngeal-intestinal valve\; and tail. Is an ortholog of human IWS1 (interacts with SUPT6H, CTD assembly factor 1).	Enriched in ventral nerve cord, body wall musculature, vulval muscle, nerve ring, dorsal nerve cord, somatic neuron, tail neuron, lateral nerve cord, pharynx and germ line according to Chronogram analysis and RNA-seq. Affected by cyc-1, daf-12, tatn-1, jmjd-3.1, hsf-1, sma-4, nuo-6, nhl-2, pals-22, sin-3, set-6, baz-2, egl-43, srbc-48, set-2, bcat-1, hlh-11 and sir-2.1 according to microarray, ti…
WBGene00002221	11937.6	0.526534	0.118217	4.45395	8.43e-06	0.00038448	3.41513	klp-10	Enriched in germ line\; head mesodermal cell\; and intestine based on proteomic\; RNA-seq\; and microarray studies. Is affected by several genes including daf-16\; dpy-10\; and eat-2 based on microarray and RNA-seq studies. Is affected by eleven chemicals including rotenone\; manganese chloride\; and D-glucose based on RNA-seq and microarray studies.	Enriched in germ line, head mesodermal cell and intestine according to proteomic study, RNA-seq and microarray. Affected by lin-35, cyc-1, tatn-1, drh-3, daf-16, npr-1, lin-28, mafr-1, elli-1, glh-4, glh-1, pgl-1, pgl-3, emb-4, sma-2, sma-4, smg-2, adr-2, eat-2, fbf-2, fbf-1, nhl-2, pals-22, ints-5, hsp-6, sek-1, aak-1, aak-2, iff-1, sin-3, anp-1, hira-1, hlh-11, atfs-1, let-418, spr-1, sir-2.1, …
WBGene00003635	1773.64	0.524068	0.114516	4.57637	4.73e-06	0.00024637	3.60841	nhr-45	Predicted to enable DNA-binding transcription factor activity\; sequence-specific DNA binding activity\; and zinc ion binding activity. Predicted to be involved in regulation of transcription, DNA-templated. Predicted to be located in nucleus.	Enriched in PVD, OLL, HOB, IL2 neuron, CEM, ray neuron type B, AFD, ASER, sensory neuron, ASI, AWC-OFF, AWC-ON, PHB and neuron according to microarray, tiling array and RNA-seq. Affected by cyc-1, daf-12, hpl-2, prg-1, elt-2, npr-1, cox-5B, jmjd-3.1, jmjd-1.2, dpy-21, mir-34, cebp-1, glh-4, glh-1, pgl-1, pgl-3, sma-2, sma-4, nuo-6, alg-1, flr-4, dlc-1, eat-2, pmt-2, nhl-2, pals-22, efa-6, sek-1, …
WBGene00020981	459.681	0.523659	0.115561	4.53146	5.86e-06	0.00029187	3.53481	W03D2.6	Enriched in OLL\; PVD\; and intestine based on microarray studies. Is affected by several genes including daf-16\; daf-2\; and glp-1 based on microarray\; tiling array\; and RNA-seq studies. Is affected by seventeen chemicals including rotenone\; manganese chloride\; and D-glucopyranose based on RNA-seq and microarray studies.	Enriched in PVD, OLL and intestine according to microarray. Affected by lin-35, clk-1, cyc-1, lin-15B, hpl-2, hcf-1, atfs-1, spg-7, smg-2, smgl-1, eat-2, lem-2, emr-1, bar-1, hlh-30, daf-2, glp-1, mdt-15, daf-16, swsn-2.2, elt-2, npr-1, hsf-1, mir-60, dpy-21, elli-1, glh-4, glh-1, pgl-1, pgl-3, mir-35, alg-1, emb-4, sma-2, sma-4, mir-71, elt-7, nuo-6, hmg-3, pmt-2, pfd-6, nhl-2, pals-22, pals-25,…
WBGene00012187	904.147	0.522206	0.124239	4.20322	2.63e-05	0.00092801	3.03245	rpb-11	Predicted to contribute to DNA-directed 5'-3' RNA polymerase activity. Predicted to be involved in transcription, DNA-templated. Predicted to be located in nucleus. Predicted to be part of RNA polymerase II, core complex. Is an ortholog of human POLR2J (RNA polymerase II subunit J).	Enriched in AFD, ASER, germ line, I5 neuron, DA neuron, SAB, retrovesicular ganglion and VA neuron according to RNA-seq and microarray. Affected by cyc-1, mab-5, aak-2, hpl-2, tatn-1, lem-2, emr-1, gld-2, clk-1, cox-5B, jmjd-3.1, jmjd-1.2, hsf-1, lmn-1, flp-6, mir-34, glh-4, glh-1, pgl-1, pgl-3, emb-4, sma-4, nuo-6, pmt-2, nhl-2, aak-1, adr-1, iff-1, sin-3, mrps-5, set-6, baz-2, set-2, hlh-11, un…
WBGene00018511	21694.1	0.521834	0.120964	4.31397	1.6e-05	0.00063239	3.19902	F46F11.8	Enriched in OLL\; body wall muscle cell\; germ line\; germline precursor cell\; and interneuron based on microarray\; tiling array\; and RNA-seq studies. Is affected by several genes including clk-1\; pgl-1\; and aak-2 based on RNA-seq and microarray studies. Is affected by ten chemicals including rotenone\; manganese chloride\; and Zidovudine based on RNA-seq and microarray studies.	Enriched in PVD, OLL, AVA, body wall muscle cell, germline precursor cell, germ line and AVK according to microarray, tiling array and RNA-seq. Affected by tatn-1, clk-1, jmjd-3.1, glh-4, glh-1, pgl-1, pgl-3, emb-4, sma-2, sma-4, lin-22, smg-2, hpl-2, pfd-6, nhl-2, pals-22, aak-1, aak-2, unc-70, iff-1, sin-3, cfp-1, mrps-5, srbc-48, hira-1, set-2, ikb-1, nfki-1, atfs-1 and mir-243 according to RN…
WBGene00001753	3830.49	0.519928	0.131371	3.9577	7.57e-05	0.00200249	2.69843	gst-5	Predicted to enable glutathione transferase activity. Involved in innate immune response. Expressed in intestine and nerve ring. Human ortholog(s) of this gene implicated in several diseases, including eye disease (multiple)\; gastrointestinal system cancer (multiple)\; and hematologic cancer (multiple). Is an ortholog of human HPGDS (hematopoietic prostaglandin D synthase).	Enriched in pharynx, dopaminergic neuron, excretory cell, GABAergic neuron, intestine, NSM, amphid sheath cell, head mesodermal cell, sensory neuron, ADL, AIN, ASG, AVA, AVE, AVG, cephalic sheath cell, CEP, coelomocyte, excretory gland cell, FLP, I1 neuron, I2 neuron, I3 neuron, I4 neuron, I6 neuron, IL2R, IL2L, MC neuron, MI neuron, OLQ, PHA, PHB, URB, URY and neuron according to microarray, til…
WBGene00009389	457.162	0.518103	0.129762	3.99273	6.53e-05	0.00180377	2.74382	F35B12.10	Predicted to enable BMP binding activity and receptor ligand activity. Predicted to be involved in animal organ morphogenesis and sequestering of BMP from receptor via BMP binding activity. Predicted to be located in extracellular space. Human ortholog(s) of this gene implicated in tooth agenesis. Is an ortholog of human GREM1 (gremlin 1, DAN family BMP antagonist).	Enriched in intestine, head mesodermal cell, ALN, AVH, AVJ and PLN according to RNA-seq. Affected by eat-2, lem-2, emr-1, daf-16, cox-5B, jmjd-3.1, jmjd-1.2, mir-34, glh-4, glh-1, pgl-1, pgl-3, fog-2, emb-4, sma-2, sma-4, elt-7, elt-2, flr-4, thoc-5, nhl-2, pals-22, nmad-1, sin-3, wdr-5.1, srbc-48, bcat-1, plp-1, atfs-1, spr-1 and hda-1 according to RNA-seq and microarray. Affected by stavudine, …
WBGene00001869	12267.2	0.517588	0.108224	4.78257	1.73e-06	0.0001165	3.93367	him-10	Predicted to enable structural molecule activity. Involved in nuclear chromosome segregation and organelle organization. Located in kinetochore. Part of Ndc80 complex. Human ortholog(s) of this gene implicated in several diseases, including castration-resistant prostate carcinoma\; gastrointestinal system cancer (multiple)\; and oral cavity carcinoma in situ. Is an ortholog of human NUF2 (NUF2 co…	Enriched in germ line according to RNA-seq. Affected by lin-35, isp-1, tatn-1, clk-1, htz-1, daf-2, npr-1, hsf-1, cec-4, set-25, met-2, glp-1, glh-4, glh-1, pgl-1, pgl-3, pig-1, emb-4, sma-2, sma-4, thoc-5, damt-1, nhl-2, pals-22, sek-1, aak-1, aak-2, mex-3, cfp-1, anp-1, mut-16, srbc-48, set-2, ikb-1, nfki-1, bcat-1, hlh-11, atfs-1, unc-30, smo-1, daf-16, dpy-10, fbf-1, mir-243, cdk-4, cyd-1, cd…
WBGene00020300	2494.74	0.51572	0.127151	4.05598	4.99e-05	0.00146236	2.83495	ssna-1	Enriched in germ line\; neurons\; and retrovesicular ganglion based on RNA-seq and microarray studies. Is affected by several genes including daf-16\; daf-2\; and hsf-1 based on RNA-seq and microarray studies. Is affected by seven chemicals including rotenone\; Rifampin\; and Psoralens based on RNA-seq and microarray studies. Human SSNA1 enables identical protein binding activity. Is an ortholog …	Enriched in AFD, germ line, I5 neuron, DA neuron, SAB, retrovesicular ganglion, VA neuron and neuron according to RNA-seq and microarray. Affected by tatn-1, gld-2, daf-2, cox-5B, jmjd-3.1, hsf-1, mir-34, glh-4, glh-1, pgl-1, pgl-3, alg-1, emb-4, sma-4, hpl-2, pmt-2, pals-22, aak-1, aak-2, iff-1, sin-3, mrps-5, srbc-48, hlh-11, atfs-1, ain-1, ain-2, fbf-1, mir-243, tdp-1 and daf-16 according to R…
WBGene00021594	216.99	0.515167	0.139819	3.68452	0.00022914	0.00455705	2.34132	tig-3	Predicted to enable cytokine activity. Predicted to be involved in SMAD protein signal transduction and positive regulation of pathway-restricted SMAD protein phosphorylation. Predicted to be located in extracellular space.	Enriched in intestine according to RNA-seq and microarray. Affected by smgl-1, clk-1, daf-16, daf-2, mir-34, elli-1, sma-2, egl-9, hmg-3, eat-2, pmt-2, ifo-1, ceh-60, wdr-5.1, mrps-5, isp-1, pqm-1, ikb-1, nfki-1, unc-30, hcf-1, sir-2.1 and ain-2 according to microarray and RNA-seq. Affected by Zidovudine, paraquat, 2 and 4-dinitroanisole according to RNA-seq and microarray.
WBGene00000966	638.802	0.514291	0.140063	3.67187	0.00024079	0.0047349	2.32469	dhs-2	Predicted to enable oxidoreductase activity. Predicted to be located in membrane. Predicted to be integral component of membrane. Human ortholog(s) of this gene implicated in autosomal recessive congenital ichthyosis 13\; fundus albipunctatus\; and night blindness. Is an ortholog of human HSD17B6 (hydroxysteroid 17-beta dehydrogenase 6) and SDR9C7 (short chain dehydrogenase\/reductase family 9C m…	Enriched in intestine and head mesodermal cell according to tiling array and RNA-seq. Affected by clk-1, daf-12, smgl-1, nhr-8, let-7, gld-1, csr-1, set-2, wdr-5.1, htz-1, daf-2, glp-1, mdt-15, daf-16, elt-2, npr-1, hsf-1, rbr-2, chd-3, let-418, dpy-21, mir-34, glh-4, glh-1, pgl-1, pgl-3, hrde-1, vit-2, emb-4, sma-2, sma-4, elt-7, alg-1, egl-9, eat-2, pry-1, pals-22, pals-25, ptl-1, ifo-1, atf-7,…
WBGene00018566	512.407	0.512444	0.129364	3.96125	7.46e-05	0.00197706	2.70398	F47E1.2	Predicted to enable sodium-independent organic anion transmembrane transporter activity. Predicted to be involved in sodium-independent organic anion transport. Predicted to be integral component of plasma membrane. Is an ortholog of human SLCO3A1 (solute carrier organic anion transporter family member 3A1).	Enriched in dopaminergic neuron, excretory cell, hypodermis and intestine according to tiling array and microarray. Affected by cyc-1, wdr-23, smgl-2, blmp-1, csr-1, daf-2, jmjd-3.1, jmjd-1.2, dop-1, dpy-21, glh-4, glh-1, pgl-1, pgl-3, alg-2, emb-4, sma-2, mir-71, ins-11, dpy-7, hpl-2, alg-1, hmg-3, eat-2, pry-1, damt-1, atfs-1, nhl-2, rrf-3, ints-1, zip-3, sek-1, smn-1, ztf-11, mex-1, mex-3, sin…
WBGene00044636	949.597	0.511614	0.117817	4.34245	1.41e-05	0.00056527	3.24774	B0393.9	Enriched in coelomocyte\; germ line\; head mesodermal cell\; and sensory neurons based on tiling array and RNA-seq studies. Is affected by several genes including daf-16\; daf-2\; and skn-1 based on microarray and RNA-seq studies. Is affected by eight chemicals including tryptophan\; manganese chloride\; and Psoralens based on microarray and RNA-seq studies.	Enriched in coelomocyte, germ line, head mesodermal cell and sensory neuron according to tiling array and RNA-seq. Affected by smg-2, clk-1, daf-2, swsn-2.2, hsf-1, chd-3, let-418, mir-34, daf-12, daf-16, dpy-21, glh-4, glh-1, pgl-1, pgl-3, ash-2, sma-2, sma-4, isp-1, nuo-6, hpl-2, hmg-3, pfd-6, pals-25, atf-7, ints-5, mex-1, mex-3, set-2, skn-1, henn-1, srbc-48, rnp-6, spr-1, unc-30, daf-18, sir…
WBGene00004388	15088.7	0.509068	0.096944	5.25116	1.51e-07	1.81e-05	4.74232	rnp-5	Predicted to enable RNA binding activity. Predicted to be involved in mRNA splicing, via spliceosome. Predicted to be located in cytoplasm and nucleoplasm. Predicted to be part of ASAP complex. Is an ortholog of human RNPS1 (RNA binding protein with serine rich domain 1).	Enriched in PVD, OLL, germ line, NSM and AFD according to microarray and RNA-seq. Affected by cyc-1, eat-2, tatn-1, gld-2, clk-1, daf-16, jmjd-3.1, jmjd-1.2, hsf-1, lmn-1, glh-4, glh-1, pgl-1, pgl-3, emb-4, sma-2, sma-4, nuo-6, daf-2, nhl-2, aak-1, aak-2, spc-1, unc-70, iff-1, sacy-1, malt-1, nfki-1, ilc-17.1, srbc-48, set-2, cox-5B, bcat-1, hlh-11, unc-30, hda-1, sir-2.1, lin-14, lin-4 and tdp-1…
WBGene00014053	1752.29	0.508849	0.124925	4.07324	4.64e-05	0.00138833	2.85751	ZK669.3	Predicted to enable oxidoreductase activity. Predicted to be located in extracellular region. Is an ortholog of human IFI30 (IFI30 lysosomal thiol reductase).	Enriched in dopaminergic neuron, ventral nerve cord, hypodermis, PVD, OLL and sensory neuron according to tiling array and RNA-seq. Affected by cyc-1, cid-1, daf-12, rsr-2, smgl-2, eat-2, hlh-30, clk-1, daf-2, dpy-21, mir-34, elli-1, sma-2, sma-4, lin-22, isp-1, nuo-6, hpl-2, hmg-3, pmt-2, damt-1, nhl-2, ifo-1, rrf-3, sek-1, aak-1, aak-2, nmad-1, spc-1, unc-70, skn-1, lin-29, mrps-5, pqm-1, ikb-1…
WBGene00019592	726.193	0.507708	0.129881	3.90901	9.27e-05	0.0023292	2.63279	K09F6.9	Enriched in coelomocyte\; intestine\; motor neurons\; pharynx\; and sensory neurons based on microarray\; tiling array\; and RNA-seq studies. Is affected by several genes including daf-16\; rrf-3\; and hsf-1 based on microarray and RNA-seq studies. Is affected by seven chemicals including methylmercuric chloride\; D-glucose\; and 4-bromodiphenyl ether based on microarray and RNA-seq studies.	Enriched in pharynx, coelomocyte, ASER, intestine, sensory neuron, AS neuron, DA neuron, DB1, DB neuron, PDB, VB1, VB2 and VB neuron according to microarray, tiling array and RNA-seq. Affected by cyc-1, sma-2, clk-1, jmjd-3.1, hsf-1, chd-3, let-418, dpy-21, mir-34, glh-4, glh-1, pgl-1, pgl-3, sma-4, mir-71, nuo-6, hpl-2, alg-1, flr-4, dlc-1, eat-2, pry-1, nhl-2, pals-22, pals-25, rrf-3, daf-16, h…
WBGene00008220	641.73	0.50741	0.144537	3.51058	0.00044713	0.00717915	2.14393	C50B6.7	Predicted to enable alpha-amylase activity\; alpha-amylase activity (releasing maltohexaose)\; and metal ion binding activity. Predicted to be involved in carbohydrate metabolic process. Expressed in intestine. Is an ortholog of human AMY2A (amylase alpha 2A) and AMY2B (amylase alpha 2B).	Enriched in intestine and head mesodermal cell according to SAGE analysis, Chronogram analysis and RNA-seq. Affected by zfp-1, cyc-1, lin-15B, hpl-2, nhr-8, prg-1, daf-2, glp-1, daf-16, ham-3, tcer-1, npr-1, jmjd-3.1, jmjd-1.2, dop-1, rbr-2, mir-60, mir-34, elli-1, daf-12, dpy-21, glh-4, glh-1, pgl-1, pgl-3, mir-35, ash-2, hrde-1, alg-2, emb-4, sma-2, sma-4, lin-22, cox-5B, elt-7, elt-2, egl-9, p…
WBGene00015553	27505	0.506447	0.132337	3.82696	0.00012974	0.00301737	2.52037	trxr-1	Predicted to enable thioredoxin-disulfide reductase activity. Involved in ecdysis, collagen and cuticulin-based cuticle. Predicted to be located in cytosol and mitochondrion. Expressed in several structures, including hypodermis\; interfacial epithelial cell\; intestine\; pharynx\; and vulva. Human ortholog(s) of this gene implicated in amyotrophic lateral sclerosis. Is an ortholog of human TXNRD…	Enriched in M2 neuron according to RNA-seq. Affected by rde-4, cyc-1, lin-35, daf-12, gld-2, clk-1, cox-5B, jmjd-3.1, jmjd-1.2, mir-34, sma-4, daf-2, nuo-6, dlc-1, iff-1, sin-3, prx-5, sir-2.1, ain-2, slr-2, tax-6, nhr-23, isp-1 and hlh-25 according to microarray, tiling array, RNA-seq and proteomic study. Affected by rotenone, resveratrol, Acrylamide, paraquat, Sirolimus and silicon dioxide nano…
WBGene00019738	1392.98	0.502167	0.113205	4.43591	9.17e-06	0.00041143	3.3857	clec-265	Predicted to enable carbohydrate binding activity. Predicted to be located in external side of plasma membrane.	Enriched in PVD, OLL, intestine and head mesodermal cell according to microarray, tiling array and RNA-seq. Affected by daf-12, cyc-1, lin-15B, age-1, lec-6, hpl-2, hcf-1, atfs-1, spg-7, wdr-23, smg-2, daf-16, tatn-1, bar-1, prg-1, ubc-9, clk-1, wrn-1, lin-35, elt-2, daf-2, glp-1, mdt-15, npr-1, cox-5B, jmjd-3.1, hyl-2, chd-3, let-418, flp-6, dpy-21, glh-4, glh-1, pgl-1, pgl-3, morc-1, alg-1, alg…
WBGene00009047	293.682	0.502048	0.143773	3.49196	0.00047949	0.00750463	2.12467	F22B8.4	Is affected by several genes including daf-16\; daf-12\; and pmk-1 based on microarray and RNA-seq studies. Is affected by nine chemicals including rotenone\; Alovudine\; and stavudine based on RNA-seq and microarray studies.	Affected by lin-35, prg-1, rbr-2, dpy-21, hrpr-1, daf-12, daf-16, glh-4, glh-1, pgl-1, pgl-3, sma-2, dpy-7, nuo-6, flr-4, adr-1, uaf-1, atfs-1, atf-7, pmk-1, ceh-60, kri-1, smn-1, ints-4, sin-3, semo-1, sftb-1, daf-1, daf-3, hlh-2, hira-1, rnp-6, cat-2, tdc-1, skpo-1, spr-1, unc-30 and nhr-49 according to microarray and RNA-seq. Affected by rotenone, Alovudine, stavudine, Zidovudine, Sodium Chlor…

## Sheet: Hypo DAF-2(-) downregulated
WormBase ID	baseMean	log2FoldChange	lfcSE	stat	pvalue	padj	public name	Automated Description	Expression Cluster Summary
WBGene00021781	330.398	-0.502275	0.145006	-3.46381	0.000532586	0.00797511	Y51H7C.3	Enriched in germ line\; germline precursor cell\; neurons\; seam cell\; and ventral nerve cord based on tiling array\; microarray\; and RNA-seq studies. Is affected by several genes including daf-16\; daf-2\; and rrf-3 based on microarray and RNA-seq studies. Is affected by eight chemicals including rotenone\; stavudine\; and Zidovudine based on RNA-seq and microarray studies. Is predicted to enc…	Enriched in neuron, BAG, germline precursor cell, ventral nerve cord, FLP, AFD, seam cell, germ line, sensory neuron, ALN, AVJ, DVA, DVC, PVD, PVN, PVP, RIG, RMG and URB according to tiling array, microarray and RNA-seq. Affected by cyc-1, lin-15B, lin-35, tatn-1, drh-3, puf-8, gld-2, fog-1, fog-3, daf-2, daf-16, npr-1, jmjd-3.1, hsf-1, mir-34, mafr-1, glh-4, glh-1, pgl-1, pgl-3, emb-4, sma-2, sm…
WBGene00011432	591.989	-0.502587	0.106701	-4.71025	2.47412e-06	0.000155337	sdz-30	Predicted to be involved in autophagy. Located in cytoplasm.	Enriched in hypodermis and AB according to tiling array and RNA-seq. Affected by tatn-1, csr-1, ubc-9, puf-8, gld-2, npr-1, hyl-2, chd-3, let-418, lin-28, mir-34, glh-4, glh-1, pgl-1, pgl-3, his-69, his-70, his-72, his-74, his-71, hmg-3, daf-2, eat-2, nhl-2, hda-6, sek-1, ceh-60, adr-1, adr-2, mex-3, npr-8, tph-1, mut-16, srbc-48, rnp-6, set-2, bcat-1, tdc-1, sir-2.1, mut-2, mir-243, lin-54, tdp-…
WBGene00001239	4881.12	-0.502743	0.109479	-4.59214	4.3872e-06	0.000234448	elo-1	Predicted to enable fatty acid elongase activity. Involved in unsaturated fatty acid biosynthetic process. Predicted to be integral component of endoplasmic reticulum membrane. Is an ortholog of human ELOVL3 (ELOVL fatty acid elongase 3) and ELOVL6 (ELOVL fatty acid elongase 6).	Enriched in intestine, germline precursor cell, somatic gonad precursor and rectal gland cell according to Chronogram analysis, tiling array, RNA-seq and microarray. Affected by cgh-1, clk-1, daf-16, lin-15B, daf-12, wrn-1, htz-1, lin-35, cox-5B, jmjd-3.1, jmjd-1.2, unc-75, mir-34, mir-35, emb-4, sma-2, sma-4, isp-1, flr-4, pmt-2, nhl-2, ints-5, sek-1, aak-1, aak-2, smn-1, pid-3, cfp-1, sin-3, sf…
WBGene00012182	2027.57	-0.502928	0.0907528	-5.54173	2.99499e-08	4.67686e-06	osta-3	Predicted to be integral component of membrane. Expressed in ciliated neurons. Is an ortholog of human SLC51A (solute carrier family 51 subunit alpha).	Enriched in NSM, germ line, germline precursor cell, head mesodermal cell, I3 neuron, intestine, neuron and body wall musculature according to RNA-seq and microarray. Affected by cgh-1, cid-1, lin-15B, daf-12, tatn-1, emr-1, lem-2, bar-1, gld-2, fog-3, jmjd-3.1, jmjd-1.2, hsf-1, mir-34, glh-4, glh-1, pgl-1, pgl-3, morc-1, alg-1, alg-2, alg-5, emb-4, elt-2, elt-7, pry-1, nhl-2, sek-1, aak-1, aak-2…
WBGene00006619	1375.9	-0.503619	0.0918047	-5.48577	4.11673e-08	5.9421e-06	try-1	Predicted to enable serine-type endopeptidase activity. Predicted to be involved in proteolysis. Expressed in germ line. Human ortholog(s) of this gene implicated in several diseases, including auditory system disease (multiple)\; pancreatic ductal carcinoma\; and prostate disease (multiple). Is an ortholog of human PRSS33 (serine protease 33).	Enriched in germ line according to RNA-seq. Affected by hpl-2, eat-2, tatn-1, fbf-1, puf-8, gld-2, glp-1, skn-1, npr-1, hsf-1, dpy-21, mir-34, unc-39, mafr-1, glh-4, glh-1, pgl-1, pgl-3, hrde-1, morc-1, sma-2, sma-4, hmg-3, fbf-2, damt-1, atfs-1, nhl-2, rrf-3, hsp-6, sek-1, aak-1, aak-2, smn-1, spc-1, raga-1, iff-1, mex-3, sin-3, cfp-1, mrps-5, srbc-48, hira-1, set-2, ikb-1, nfki-1, hlh-11, sir-2…
WBGene00022402	829.993	-0.503981	0.114692	-4.3942	1.11183e-05	0.000473154	lmtr-2	Predicted to contribute to guanyl-nucleotide exchange factor activity and molecular adaptor activity. Predicted to be involved in several processes, including cellular response to amino acid stimulus\; positive regulation of TOR signaling\; and regulation of cell growth. Predicted to be part of Ragulator complex. Is an ortholog of human LAMTOR2 (late endosomal\/lysosomal adaptor, MAPK and MTOR ac…	Enriched in dopaminergic neuron, hypodermis, germ line and neuron according to tiling array, RNA-seq and microarray. Affected by let-7, gld-1, gld-2, fog-3, jmjd-3.1, jmjd-1.2, sma-2, sma-4, lin-22, daf-2, smn-1, sin-3, csr-1, mrps-5, bcat-1, unc-30 and fbf-1 according to proteomic study, RNA-seq and microarray. Affected by rotenone, Rifampin, silicon dioxide nanoparticle, Atrazine and fluoranthe…
WBGene00019922	231.742	-0.50644	0.139628	-3.62706	0.00028667	0.00524662	fbxc-28	Enriched in BAG\; germ line\; hypodermis\; and pharyngeal muscle cell based on tiling array and RNA-seq studies. Is affected by several genes including daf-2\; dpy-10\; and eat-2 based on microarray\; tiling array\; and RNA-seq studies. Is affected by fourteen chemicals including hydrogen sulfide\; methylmercuric chloride\; and rotenone based on microarray and RNA-seq studies. Is predicted to enc…	Enriched in BAG, hypodermis, pharyngeal muscle cell and germ line according to tiling array and RNA-seq. Affected by cyc-1, fer-1, rsr-2, tatn-1, puf-8, clk-1, hyl-2, chd-3, let-418, lin-28, mir-34, glh-4, glh-1, pgl-1, pgl-3, sma-4, his-69, his-70, his-72, his-74, his-71, hpl-2, alg-1, hmg-3, eat-2, daf-2, nhl-2, efa-6, ptl-1, ptrn-1, sek-1, hsb-1, meg-3, meg-4, mex-1, mex-3, sin-3, spn-4, npr-8…
WBGene00012193	933.178	-0.506898	0.110123	-4.60301	4.16423e-06	0.000228364	vps-25	Predicted to enable protein homodimerization activity and structural molecule activity. Predicted to be involved in protein transport to vacuole involved in ubiquitin-dependent protein catabolic process via the multivesicular body sorting pathway. Predicted to be part of ESCRT II complex. Expressed in body wall musculature\; pharyngeal muscle cell\; and vulval muscle. Is an ortholog of human VPS2…	Enriched in neuron, hypodermis, PVD, OLL, NSM, germ line, AVK, RIS, sensory neuron, DVC, RIA and VA neuron according to tiling array, RNA-seq and microarray. Affected by rsr-2, lem-2, emr-1, jmjd-3.1, hsf-1, mir-34, pfd-6, set-6, baz-2, egl-43, hda-1, sir-2.1, slr-2 and lin-54 according to RNA-seq, microarray and proteomic study. Affected by Rifampin, allantoin, cadmium, Diazinon, Humic Substance…
WBGene00010904	8665.49	-0.50856	0.110323	-4.60974	4.03178e-06	0.000224004	ugt-62	Predicted to enable glucuronosyltransferase activity. Predicted to be located in intracellular membrane-bounded organelle. Human ortholog(s) of this gene implicated in several diseases, including Crigler-Najjar syndrome\; Gilbert syndrome\; and female reproductive organ cancer (multiple). Is an ortholog of human UGT2B7 (UDP glucuronosyltransferase family 2 member B7).	Enriched in intestine and head mesodermal cell according to SAGE analysis, tiling array and RNA-seq. Affected by cyc-1, isp-1, cid-1, sma-2, atfs-1, spg-7, prp-8, daf-2, let-7, gld-1, bar-1, prg-1, ubc-9, clk-1, wdr-5.1, htz-1, lin-35, hpk-1, tcer-1, cox-5B, jmjd-3.1, jmjd-1.2, hsf-1, mir-60, chd-3, let-418, glp-1, daf-12, daf-16, dpy-21, set-4, glh-4, glh-1, pgl-1, pgl-3, mir-35, ash-2, alg-1, a…
WBGene00019663	298.586	-0.508669	0.134668	-3.77721	0.000158595	0.00349134	K11H12.7	Expressed in body wall musculature\; head neurons\; pharyngeal neurons\; and pharynx.	Enriched in neuron, muscle cell, AFD, ASER, PLM, head mesodermal cell, sensory neuron and cephalic sheath cell according to RNA-seq. Affected by clk-1, cyc-1, let-7, gld-1, lem-2, emr-1, prg-1, daf-2, jmjd-1.2, rbr-2, glp-1, mes-2, dpy-21, mir-34, daf-12, glh-4, glh-1, pgl-1, pgl-3, alg-1, sma-2, sma-4, damt-1, nhl-2, sek-1, aak-1, aak-2, mex-3, sin-3, sftb-1, mrps-5, egl-43, srbc-48, set-2, atfs…
WBGene00003087	777.599	-0.508704	0.115389	-4.4086	1.04039e-05	0.000450975	lsy-2	Predicted to enable DNA-binding transcription factor activity and RNA polymerase II cis-regulatory region sequence-specific DNA binding activity. Predicted to be involved in regulation of transcription by RNA polymerase II. Expressed in several structures, including ASE\; head muscle\; head neurons\; intestine\; and somatic nervous system. Is an ortholog of human ZNF148 (zinc finger protein 148).	Enriched in PVD, OLL, NSM, germ line, head mesodermal cell, sensory neuron and intestine according to microarray, tiling array and RNA-seq. Affected by sma-2, daf-12, emr-1, cox-5B, jmjd-3.1, hsf-1, glp-1, cebp-1, glh-4, glh-1, pgl-1, pgl-3, hrde-1, morc-1, dlc-1, pry-1, sek-1, aak-1, aak-2, iff-1, set-6, baz-2, lag-1, egl-43, rnp-6, smo-1, hda-1, sir-2.1, dys-1, slr-2, ain-2 and tbx-2 according …
WBGene00015167	307.635	-0.509442	0.138732	-3.67212	0.000240547	0.0047349	B0403.3	Predicted to be located in extracellular region.	Enriched in sensory neuron and neuron according to RNA-seq and microarray. Affected by cyc-1, daf-12, atfs-1, spg-7, smgl-1, pgrn-1, wrn-1, elt-2, daf-16, ham-3, tcer-1, rsks-1, npr-1, cox-5B, jmjd-3.1, jmjd-1.2, hsf-1, mir-60, chd-3, mir-34, glh-4, glh-1, pgl-1, pgl-3, vit-2, atm-1, mir-71, nuo-6, alg-1, hmg-3, spt-16, dlc-1, eat-2, daf-2, pmt-2, pals-25, nmad-1, unc-70, ints-4, raga-1, sftb-1, …
WBGene00194892	1898.81	-0.51003	0.119925	-4.25292	2.11e-05	0.000777425	dsb-2	Located in condensed chromosome. Expressed in germ cell and gonad.	Enriched in germ line and head mesodermal cell according to RNA-seq. Affected by tatn-1, glp-1, skn-1, swsn-2.2, jmjd-3.1, lsm-1, set-25, met-2, glh-4, glh-1, pgl-1, pgl-3, emb-4, sma-4, elt-2, elt-7, nuo-6, eat-2, damt-1, nhl-2, sek-1, aak-1, aak-2, spc-1, sin-3, olrn-1, srbc-48, set-2, ikb-1, nfki-1, hlh-11, atfs-1, sir-2.1, fbf-1, mir-243, lin-54, cdk-4, cyd-1, cdk-2, cye-1 and tdp-1 according…
WBGene00022280	1343.95	-0.510095	0.140244	-3.63721	0.000275608	0.00512454	Y74C10AL.2	Predicted to be involved in late endosome to vacuole transport via multivesicular body sorting pathway. Predicted to be located in membrane. Predicted to be integral component of membrane. Is an ortholog of human TMEM50A (transmembrane protein 50A) and TMEM50B (transmembrane protein 50B).	Enriched in muscle cell, PLM, germ line, somatic gonad precursor, sensory neuron, I5 neuron, DA neuron, SAB, retrovesicular ganglion, VA neuron and neuron according to RNA-seq and microarray. Affected by cyc-1, jmjd-3.1, emb-4, damt-1, pals-25, aak-1, aak-2, mrps-5, unc-30, fbf-1, spg-7, isp-1 and nuo-6 according to microarray and RNA-seq. Affected by rotenone, antimycin and silicon dioxide nanop…
WBGene00014031	392.696	-0.511451	0.118623	-4.31156	1.6211e-05	0.000633993	ZK637.14	Predicted to enable ubiquitin protein ligase activity. Predicted to be involved in ERAD pathway. Predicted to be located in endoplasmic reticulum.	Enriched in PVD, OLL, seam cell, germ line, AVK, sensory neuron and intestine according to microarray and RNA-seq. Affected by cyc-1, dapk-1, lin-15B, daf-12, gld-2, clk-1, jmjd-3.1, glp-1, glh-4, glh-1, pgl-1, pgl-3, ins-11, isp-1, nuo-6, eat-2, fbf-2, fbf-1, daf-2, sek-1, set-2, sftb-1, henn-1, mrps-5, set-6, baz-2, egl-43, bcat-1, spr-5, mep-1, sir-2.1 and lin-54 according to microarray, tilin…
WBGene00019963	204.588	-0.512534	0.151141	-3.3911	0.000696134	0.00960254	rips-1	Expressed in intestine. Is predicted to encode a protein with the following domains: Methyltransferase domain\; Methyltransferase domain\; S-adenosyl-L-methionine-dependent methyltransferase\; and Winged helix-like DNA-binding domain superfamily.	Enriched in germline precursor cell, intestine and male-specific anatomical entity according to tiling array, RNA-seq and microarray. Affected by hda-1, daf-12, lin-35, clk-1, cyc-1, isp-1, cid-1, age-1, nhr-49, hpl-2, nhr-114, smg-2, smgl-1, eat-2, ced-3, tatn-1, ubc-9, wrn-1, tdp-1, daf-2, ham-3, rsks-1, npr-1, cox-5B, jmjd-1.2, hsf-1, let-418, dpy-21, mir-34, daf-16, set-4, glh-4, glh-1, pgl-1…
WBGene00004489	3760.33	-0.513183	0.105752	-4.85271	1.21787e-06	8.95642e-05	rps-20	Predicted to be a structural constituent of ribosome. Predicted to be involved in translation. Predicted to be located in cytoplasm and ribosome. Predicted to be part of cytosolic small ribosomal subunit. Is an ortholog of human RPS20 (ribosomal protein S20).	Enriched in hypodermis, PVD, OLL, AFD, ASER, PLM, germ line, somatic gonad precursor, ADA, AVG, CAN, distal tip cell, excretory gland cell, I4 neuron, RIG, spermatheca and muscle cell according to tiling array, RNA-seq and microarray. Affected by nhr-40, aak-2, atx-3, nhr-49, daf-12, ZK1236.1, dep-1, glh-4, glh-1, pgl-1, pgl-3, emb-4, lin-22, isp-1, hmg-3, nhl-2, erh-2, pid-3, tofu-6, tost-1, nma…
WBGene00045246	327.615	-0.513594	0.139223	-3.689	0.000225139	0.0045355	C29E4.15	Predicted to be located in membrane. Predicted to be integral component of membrane.	Enriched in hypodermis, NSM, gon_male_dtc posterior, gon_male_dtc anterior, Z1.p, Z4.a, AFD, germ line, somatic gonad precursor and sensory neuron according to tiling array and RNA-seq. Affected by pgrn-1, bar-1, wrn-1, tdp-1, set-25, met-2, dpy-21, mir-34, daf-12, daf-16, glh-4, glh-1, pgl-1, pgl-3, sma-2, cox-5B, eat-2, pry-1, pfd-6, damt-1, rrf-3, ints-1, hsp-6, aak-1, aak-2, adr-1, smn-1, spc…
WBGene00013139	878.684	-0.51404	0.123147	-4.17418	2.9906e-05	0.0010049	Y53C12A.3	Predicted to be involved in cell differentiation. Predicted to be located in Golgi apparatus. Is an ortholog of human YIPF3 (Yip1 domain family member 3).	Enriched in hypodermis, NSM and germ line according to tiling array and RNA-seq. Affected by cyc-1, tatn-1, clk-1, daf-16, hsf-1, elli-1, glh-4, glh-1, pgl-1, pgl-3, emb-4, sma-2, sma-4, smo-1, daf-2, pmt-2, pals-22, unc-70, cfp-1, set-6, baz-2, hlh-11 and spr-1 according to microarray, RNA-seq and proteomic study. Affected by rotenone, Rifampin, allantoin and silicon dioxide nanoparticle accordi…
WBGene00009588	967.022	-0.514244	0.126208	-4.07457	4.60999e-05	0.00138805	F40F11.3	Enriched in germ line\; intestine\; and neurons based on RNA-seq and microarray studies. Is affected by several genes including daf-2\; daf-12\; and sir-2.1 based on tiling array\; RNA-seq\; proteomic\; and microarray studies. Is affected by ten chemicals including hydrogen sulfide\; rotenone\; and levamisole based on microarray and RNA-seq studies. Is predicted to encode a protein with the follo…	Enriched in AFD, RID, germ line, AVK, sensory neuron and intestine according to RNA-seq and microarray. Affected by daf-12, tatn-1, jmjd-3.1, unc-39, glh-4, glh-1, pgl-1, pgl-3, emb-4, sma-4, lin-22, daf-2, hpl-2, aak-1, aak-2, mex-1, mex-3, sin-3, cfp-1, set-2, mrps-5, egl-43, srbc-48, hlh-11, atfs-1, let-418, spr-1, sir-2.1, mir-243, lin-54 and tdp-1 according to tiling array, RNA-seq, proteomi…
WBGene00010870	242.137	-0.515028	0.135226	-3.80864	0.000139733	0.00318633	let-522	Predicted to be located in membrane. Predicted to be integral component of membrane. Expressed in pharynx.	Enriched in pharynx, dopaminergic neuron, intestine, PVD, OLL, hermaphrodite-specific anatomical entity, ASER and head mesodermal cell according to microarray, tiling array and RNA-seq. Affected by clk-1, cyc-1, lin-15B, eat-2, emr-1, lem-2, wrn-1, htz-1, daf-16, cox-5B, jmjd-3.1, jmjd-1.2, hsf-1, skn-1, mir-34, glh-4, glh-1, pgl-1, pgl-3, alg-2, emb-4, sma-2, sma-4, lin-22, elt-2, flr-4, daf-2, …
WBGene00007194	174.354	-0.515544	0.143031	-3.60442	0.000312855	0.0055658	dph-5	Predicted to enable diphthine synthase activity. Predicted to be involved in methylation and peptidyl-diphthamide biosynthetic process from peptidyl-histidine. Is an ortholog of human DPH5 (diphthamide biosynthesis 5).	Enriched in PVD, OLL, germ line and somatic gonad precursor according to tiling array and RNA-seq. Affected by lin-35, daf-12, eat-2, tatn-1, daf-2, glp-1, skn-1, cox-5B, hsf-1, mir-34, daf-16, dpy-21, glh-4, glh-1, pgl-1, pgl-3, sma-4, mir-71, isp-1, nuo-6, pmt-2, nhl-2, iff-1, sin-3, cfp-1, set-2, sir-2.1, slr-2 and fbf-1 according to microarray, tiling array and RNA-seq. Affected by rotenone, …
WBGene00003372	1096.58	-0.517434	0.116859	-4.42784	9.51807e-06	0.000420387	mlc-4	Predicted to enable calcium ion binding activity. Involved in several processes, including cytoskeleton-dependent cytokinesis\; embryonic body morphogenesis\; and nematode larval development. Located in cytoplasm. Part of filamentous actin. Human ortholog(s) of this gene implicated in familial hypertrophic cardiomyopathy. Is an ortholog of human MYL9 (myosin light chain 9).	Enriched in germ line, excretory cell, GABAergic neuron, rectal gland cell and spermatheca according to proteomic study, tiling array and RNA-seq. Affected by cyc-1, aak-2, nhr-49, daf-12, let-7, gld-1, htz-1, lin-35, jmjd-3.1, jmjd-1.2, atm-1, set-26, nhl-2, aak-1, sin-3, mrps-5, hlh-11, sir-2.1, alg-1, fbf-1, cdk-4 and cyd-1 according to microarray, RNA-seq, proteomic study and tiling array. Af…
WBGene00007390	1715.96	-0.517486	0.117717	-4.39602	1.10252e-05	0.00047203	lmtr-3	Predicted to be involved in cellular response to amino acid stimulus and positive regulation of TOR signaling. Predicted to be part of Ragulator complex. Is an ortholog of human LAMTOR3 (late endosomal\/lysosomal adaptor, MAPK and MTOR activator 3).	Enriched in dopaminergic neuron, hypodermis, AFD, ASER, germ line and intestine according to tiling array, RNA-seq and microarray. Affected by lin-39, daf-12, daf-16, let-7, gld-1, lem-2, emr-1, prg-1, gld-2, swsn-2.2, npr-1, jmjd-3.1, jmjd-1.2, flp-6, glh-4, glh-1, pgl-1, pgl-3, vgln-1, sma-2, sma-4, ints-5, sin-3, set-6, baz-2, egl-43, hlh-11 and sir-2.1 according to RNA-seq, tiling array, micr…
WBGene00017348	603.821	-0.517832	0.124652	-4.15423	3.26378e-05	0.0010752	F10E7.6	Predicted to be located in membrane. Predicted to be integral component of membrane.	Enriched in germline precursor cell, germ line, neuron and muscle cell according to tiling array, RNA-seq and microarray. Affected by cyc-1, lin-15B, let-7, gld-1, htz-1, bar-1, cox-5B, jmjd-3.1, jmjd-1.2, hsf-1, chd-3, let-418, glh-4, glh-1, pgl-1, pgl-3, emb-4, sma-2, sma-4, daf-2, nuo-6, pmt-2, damt-1, ints-1, smn-1, unc-70, mrps-5, atp-2, sir-2.1, fbf-1 and glp-1 according to microarray, prot…
WBGene00008922	1013.63	-0.5195	0.120479	-4.31195	1.61819e-05	0.000633993	F17C11.11	Enriched in body wall musculature\; intestine\; neurons\; and somatic gonad precursor based on RNA-seq and microarray studies. Is affected by several genes including daf-2\; rrf-3\; and daf-12 based on microarray\; tiling array\; RNA-seq\; and proteomic studies. Is affected by nineteen chemicals including 1-methylnicotinamide\; Tunicamycin\; and levamisole based on RNA-seq and microarray studies.	Enriched in NSM, AFD, intestine, somatic gonad precursor, ADF, ASH, ASI, DVB, RIS, SIA, SIB, SMB, SMD, VB1, VB2, VB neuron and body wall musculature according to RNA-seq and microarray. Affected by cyc-1, lin-15B, daf-12, hpl-2, smg-2, smgl-1, lem-2, emr-1, lin-35, npr-1, hsf-1, rbr-2, chd-3, let-418, dpy-21, kgb-1, mir-34, glh-4, glh-1, pgl-1, pgl-3, ash-2, morc-1, alg-1, alg-5, emb-4, sma-2, li…
WBGene00015789	429.043	-0.519957	0.127799	-4.06857	4.7303e-05	0.00140913	syx-6	Predicted to enable SNAP receptor activity. Predicted to be involved in endoplasmic reticulum to Golgi vesicle-mediated transport\; synaptic vesicle docking\; and vesicle fusion with Golgi apparatus. Located in Golgi trans cisterna. Predicted to be part of SNARE complex. Expressed in head. Is an ortholog of human STX10 (syntaxin 10) and STX6 (syntaxin 6).	Enriched in intestine, coelomocyte and spermatheca according to Chronogram analysis and RNA-seq. Affected by clk-1, daf-12, lem-2, emr-1, hsf-1, glh-4, glh-1, pgl-1, pgl-3, hrde-1, morc-1, alg-2, sma-4, daf-2, nuo-6, aak-1, aak-2, sin-3, set-6, baz-2, olrn-1, let-418, spr-1, ain-1, ain-2 and alg-1 according to microarray, tiling array and RNA-seq. Affected by rotenone and silicon dioxide nanopart…
WBGene00003623	137.362	-0.519981	0.150422	-3.45682	0.000546595	0.00812407	nhr-25	Enables armadillo repeat domain binding activity. Involved in molting cycle and positive regulation of nematode male tail tip morphogenesis. Acts upstream of or within positive regulation of transcription by RNA polymerase II. Located in nucleus. Predicted to be part of RNA polymerase II transcription regulator complex. Expressed in several structures, including excretory system\; gonad\; hypoder…	Enriched in body wall musculature, gon_male_dtc posterior, gon_male_dtc anterior, Z1.p, Z4.a, PLM and somatic gonad precursor according to RNA-seq. Affected by hlh-1, unc-120, wdr-23, lem-2, emr-1, prg-1, gld-2, clk-1, wrn-1, csr-1, jmjd-3.1, jmjd-1.2, daf-2, chd-3, let-418, mir-34, lin-41, let-7, glh-4, glh-1, pgl-1, pgl-3, morc-1, alg-1, alg-2, sma-2, sma-4, lin-22, set-9, set-26, hpl-2, spt-16…
WBGene00002268	2700.83	-0.521681	0.0861751	-6.05373	1.41525e-09	3.35847e-07	lec-5	Predicted to enable galactoside binding activity. Located in membrane raft. Is an ortholog of human LGALS4 (galectin 4).	Enriched in germ line, body wall muscle cell, muscle cell, PLM and gonadal sheath cell according to proteomic study, tiling array, RNA-seq and microarray. Affected by zfp-1, clk-1, cyc-1, cid-1, daf-16, lin-15B, pdf-1, pgl-1, daf-2, lem-2, emr-1, tdp-1, glp-1, jmjd-3.1, rbr-2, chd-3, let-418, mir-34, dpy-21, glh-4, glh-1, pgl-3, emb-4, elt-2, elt-7, smo-1, isp-1, pry-1, pals-22, zip-3, sek-1, pid…
WBGene00008926	1142.93	-0.522231	0.101913	-5.12431	2.98631e-07	3.05161e-05	F17H10.2	Predicted to be located in membrane. Predicted to be integral component of membrane.	Enriched in dopaminergic neuron, germline precursor cell, hypodermis and FLP according to tiling array and RNA-seq. Affected by zfp-1, cyc-1, let-7, gld-1, ubc-9, clk-1, ham-3, jmjd-3.1, jmjd-1.2, hsf-1, mir-34, glh-4, glh-1, pgl-1, pgl-3, alg-2, fog-2, sma-2, sma-4, lin-22, nuo-6, eat-2, pmt-2, pry-1, pals-22, rrf-3, sek-1, aak-1, aak-2, nmad-1, spc-1, unc-70, ints-4, mex-1, mex-3, spn-4, sftb-1…
WBGene00009531	813.33	-0.523015	0.131079	-3.99006	6.60554e-05	0.00181342	F38B2.4	Predicted to enable adenylate kinase activity. Predicted to be involved in nucleoside diphosphate phosphorylation and nucleoside triphosphate biosynthetic process. Predicted to be located in cytosol. Human ortholog(s) of this gene implicated in congenital nonspherocytic hemolytic anemia and obesity. Is an ortholog of human AK1 (adenylate kinase 1).	Enriched in BAG, body wall muscle cell, cephalic sheath cell, NSM, muscle cell, head mesodermal cell and intestine according to tiling array, RNA-seq and microarray. Affected by daf-2, clk-1, let-7, gld-1, lem-2, emr-1, mdt-15, tcer-1, npr-1, jmjd-1.2, glh-4, glh-1, pgl-1, pgl-3, emb-4, isp-1, nuo-6, flr-4, damt-1, pals-22, pals-25, pid-3, wdr-5.1, mrps-5, set-6, baz-2, malt-1, nfki-1, ilc-17.1, …
WBGene00044604	341.466	-0.524171	0.149731	-3.50075	0.000463947	0.0073481	T10F2.5	Predicted to be involved in endoplasmic reticulum to Golgi vesicle-mediated transport. Predicted to be located in cytoplasm and nucleus. Predicted to be part of TRAPP complex. Is an ortholog of human TRAPPC2L (trafficking protein particle complex subunit 2L).	Enriched in hypodermis, PVD, OLL, AFD and germ line according to tiling array and RNA-seq. Affected by smg-2, jmjd-3.1, jmjd-1.2, hsf-1, mir-34, hpl-2, damt-1, iff-1, sin-3 and set-2 according to microarray and RNA-seq. Affected by hydrogen sulfide, rotenone, allantoin, Psoralens, metformin, Sirolimus, Rifampin, antimycin and silicon dioxide nanoparticle according to microarray and RNA-seq.
WBGene00019686	1201.2	-0.524691	0.106029	-4.94854	7.47735e-07	6.10029e-05	K12H6.6	Predicted to be involved in membrane organization and phospholipid homeostasis. Predicted to be located in plasma membrane. Is an ortholog of human TLCD1 (TLC domain containing 1).	Enriched in excretory cell, GABAergic neuron and somatic gonad precursor according to tiling array and RNA-seq. Affected by cyc-1, daf-12, ham-3, npr-1, kgb-1, mir-34, glp-1, glh-4, glh-1, pgl-1, pgl-3, emb-4, daf-2, nuo-6, eat-2, nhl-2, rpl-33, rpl-5, aak-1, aak-2, iff-1, henn-1, set-6, baz-2, hlh-11, sir-2.1, dcr-1 and alg-1 according to microarray, tiling array, RNA-seq and proteomic study. Af…
WBGene00016641	255.143	-0.526898	0.127076	-4.14631	3.3787e-05	0.00110012	C44C1.1	Predicted to be located in membrane. Predicted to be integral component of membrane.	Enriched in PVD, OLL, hypodermis, germ line, somatic gonad precursor, sensory neuron, gonadal sheath cell and intestine according to microarray, tiling array and RNA-seq. Affected by clk-1, cyc-1, lem-2, emr-1, tdp-1, bar-1, npr-1, set-25, met-2, dpy-21, glh-4, glh-1, pgl-1, pgl-3, alg-1, sma-2, nhl-2, ints-9, sek-1, aak-1, aak-2, unc-70, meg-3, meg-4, sin-3, sftb-1, rnp-6, set-2, atfs-1, let-418…
WBGene00023414	201.669	-0.530748	0.151475	-3.50387	0.000458557	0.00732071	R01H2.7	Predicted to be located in membrane. Predicted to be integral component of membrane.	Enriched in neuron, dopaminergic neuron, excretory cell, ventral nerve cord, hypodermis, PVD, OLL, AFD, ASER, PLM, head mesodermal cell, sensory neuron, AVD, BAG, DB neuron, HSN, I1 neuron, MC neuron, PVC, RID, RIG, RMDR, RMDL, RMF, SAA and VA12 according to tiling array and RNA-seq. Affected by hpl-2, rsr-2, csr-1, jmjd-3.1, jmjd-1.2, mir-34, glh-4, glh-1, pgl-1, pgl-3, emb-4, daf-2, isp-1, nuo-…
WBGene00019550	1089.22	-0.531623	0.12661	-4.1989	2.68215e-05	0.00093882	K09C4.5	Predicted to enable transmembrane transporter activity. Predicted to be involved in transmembrane transport. Predicted to be located in membrane. Predicted to be integral component of membrane.	Enriched in PVD, OLL, ASER and intestine according to microarray, RNA-seq and proteomic study. Affected by clk-1, cyc-1, hpl-2, smgl-1, eat-2, nhr-62, blmp-1, csr-1, bar-1, ubc-9, daf-16, daf-2, npr-1, jmjd-3.1, jmjd-1.2, rbr-2, cec-4, dpy-27, set-25, met-2, daf-12, dpy-21, glh-4, glh-1, pgl-1, pgl-3, ash-2, emb-4, sma-2, sma-4, lin-22, ins-11, drh-3, his-69, his-70, his-72, his-74, his-71, adr-2…
WBGene00000896	1518.53	-0.532866	0.130244	-4.09129	4.28985e-05	0.00132005	dad-1	Involved in negative regulation of apoptotic process. Predicted to be located in endoplasmic reticulum membrane. Predicted to be integral component of membrane. Predicted to be part of oligosaccharyltransferase complex. Is an ortholog of human DAD1 (defender against cell death 1).	Enriched in hypodermis, AFD, ASER, germ line, sensory neuron, excretory gland cell, spermatheca, VB1 and intestine according to tiling array, RNA-seq and microarray. Affected by cgh-1, daf-12, let-7, gld-1, tatn-1, clk-1, npr-1, cox-5B, jmjd-1.2, hsf-1, set-25, met-2, mir-34, emb-4, sma-2, sma-4, lin-22, smo-1, daf-2, isp-1, nuo-6, set-26, ints-6, aak-1, aak-2, smn-1, unc-70, iff-1, sin-3, cfp-1,…
WBGene00016390	774.515	-0.533671	0.131795	-4.04924	5.13851e-05	0.00149262	ttc-1	Expressed in intestinal cell and neurons. Is predicted to encode a protein with the following domain: Tetratricopeptide-like helical domain superfamily. Is an ortholog of human TTC1 (tetratricopeptide repeat domain 1).	Enriched in intestine, germline precursor cell, AFD, germ line and muscle cell according to Chronogram analysis, tiling array, RNA-seq and microarray. Affected by hpl-2, let-7, gld-1, daf-16, hsf-1, mir-34, glh-4, glh-1, pgl-1, pgl-3, emb-4, sma-2, sma-4, daf-2, nuo-6, damt-1, adr-1, sin-3, mrps-5, set-6, baz-2, set-2, sir-2.1 and isp-1 according to tiling array, proteomic study, RNA-seq and micr…
WBGene00022334	280.477	-0.534302	0.138675	-3.85289	0.00011673	0.00278897	Y82E9BR.1	Enriched in PLM\; Z1.p\; Z4.a\; male distal tip cell\; and somatic gonad precursor based on RNA-seq studies. Is affected by several genes including daf-2\; eat-2\; and tph-1 based on microarray and RNA-seq studies. Is affected by twelve chemicals including 1-methylnicotinamide\; methylmercuric chloride\; and bisphenol S based on RNA-seq and microarray studies.	Enriched in gon_male_dtc posterior, gon_male_dtc anterior, Z1.p, Z4.a, Z4, Z1 and PLM according to RNA-seq. Affected by rsks-1, daf-2, mir-34, glh-4, glh-1, pgl-1, pgl-3, sma-2, sma-4, hmg-3, flr-4, eat-2, nhl-2, hsb-1, ceh-60, kri-1, mpk-2, meg-3, meg-4, mex-3, sin-3, tph-1, srbc-48, rnp-6, bcat-1, swsn-1, tdc-1, let-418, spr-1, unc-30, cdk-4 and cyd-1 according to proteomic study, microarray an…
WBGene00001244	15395.1	-0.534465	0.121873	-4.38542	1.15765e-05	0.000491159	elo-6	Predicted to enable fatty acid elongase activity. Predicted to be involved in fatty acid biosynthetic process and sphingolipid biosynthetic process. Predicted to be integral component of endoplasmic reticulum membrane. Expressed in amphid neurons\; intestine\; nerve ring\; and vulva. Is an ortholog of human ELOVL3 (ELOVL fatty acid elongase 3) and ELOVL6 (ELOVL fatty acid elongase 6).	Enriched in pharynx, intestine, pharyngeal muscle cell, PVD and OLL according to microarray, SAGE analysis, Chronogram analysis, tiling array, RNA-seq and proteomic study. Affected by cid-1, lin-35, atfs-1, spg-7, let-7, gld-1, ubc-9, skn-1, swsn-2.2, daf-16, npr-1, cox-5B, jmjd-1.2, hsf-1, chd-3, let-418, set-25, met-2, daf-12, dpy-21, glh-4, glh-1, pgl-1, pgl-3, vit-2, emb-4, sma-2, sma-4, flr-…
WBGene00017730	403.85	-0.534754	0.120685	-4.431	9.37976e-06	0.000418236	F22H10.6	Enriched in distal tip cell\; head mesodermal cell\; intestine\; muscle cell\; and sensory neurons based on RNA-seq and microarray studies. Is affected by several genes including daf-16\; daf-2\; and hsf-1 based on microarray and RNA-seq studies. Is affected by eight chemicals including D-glucose\; Psoralens\; and allantoin based on RNA-seq and microarray studies.	Enriched in intestine, AFD, ASER, PLM, head mesodermal cell, sensory neuron, distal tip cell and muscle cell according to RNA-seq and microarray. Affected by clk-1, pgrn-1, prg-1, tdp-1, ham-3, swsn-2.2, tcer-1, npr-1, hsf-1, chd-3, let-418, mir-34, glh-4, glh-1, pgl-1, pgl-3, vit-2, alg-2, sma-2, sma-4, daf-2, alg-1, egl-9, hmg-3, flr-4, damt-1, nhl-2, efa-6, daf-16, ints-1, hsp-6, aak-1, aak-2,…
WBGene00004822	176.96	-0.535326	0.153546	-3.48642	0.000489526	0.00756455	skr-16	Predicted to enable cullin family protein binding activity. Predicted to be involved in SCF-dependent proteasomal ubiquitin-dependent protein catabolic process. Predicted to be located in cytoplasm and nucleus.	Enriched in dopaminergic neuron, hypodermis, AFD, somatic gonad precursor, sensory neuron, intestine and neuron according to tiling array, RNA-seq and microarray. Affected by cyc-1, daf-12, gld-2, glp-1, skn-1, cox-5B, hsf-1, mes-2, mes-6, chd-3, glh-4, glh-1, pgl-1, pgl-3, vit-2, nuo-6, hpl-2, daf-2, ints-1, aak-1, aak-2, set-6, baz-2, rnp-6, set-2, alg-1, dpy-9, dpy-10, mir-243 and lin-54 accor…
WBGene00012156	1968.98	-0.535579	0.105586	-5.07242	3.92796e-07	3.79279e-05	ebp-2	Predicted to enable microtubule plus-end binding activity. Predicted to be involved in protein localization to microtubule plus-end\; regulation of microtubule polymerization or depolymerization\; and spindle assembly. Located in several cellular components, including kinetochore\; microtubule cytoskeleton\; and non-motile cilium. Expressed in several structures, including hypodermis\; nervous sy…	Enriched in germ line, PVD, OLL, FLP, NSM and neuron according to proteomic study, microarray and RNA-seq. Affected by let-7, gld-1, tatn-1, lem-2, emr-1, gld-2, fog-1, fog-3, npr-1, jmjd-3.1, jmjd-1.2, hsf-1, glp-1, morc-1, emb-4, sma-2, sma-4, nuo-6, nhl-2, mina-1, sek-1, spc-1, unc-70, mrps-5, hlh-11, mrpl-2, unc-30, hda-1, csr-1, ain-1, ain-2, alg-1 and fbf-1 according to proteomic study, RNA…
WBGene00019381	1380.74	-0.537794	0.129445	-4.15461	3.25844e-05	0.0010752	K04C2.3	Enriched in several structures, including PVW\; ciliated neurons\; dopaminergic neurons\; germ line\; and intestine based on tiling array\; RNA-seq\; and microarray studies. Is affected by several genes including daf-16\; daf-2\; and daf-12 based on microarray\; tiling array\; and RNA-seq studies. Is affected by ten chemicals including rotenone\; Zidovudine\; and Rifampin based on RNA-seq and mic…	Enriched in dopaminergic neuron, germ line, AFD, ADE, CEP, IL1 neuron, OLL, PDE, PVW, intestine and muscle cell according to tiling array, RNA-seq and microarray. Affected by cgh-1, cyc-1, daf-16, daf-12, gld-2, fog-3, swsn-2.2, daf-2, jmjd-3.1, jmjd-1.2, hsf-1, morc-1, emb-4, sma-4, lin-22, nhl-2, ints-5, unc-70, sin-3, cfp-1, lag-1, egl-43, srbc-48, cox-5B, hlh-11, atfs-1, spr-1, nhr-49, sir-2.…
WBGene00020155	770.804	-0.538439	0.120612	-4.46421	8.03645e-06	0.000370126	T02B11.3	Expressed in AMshL\; AMshR\; amphid sheath cell\; and phasmid sheath cell.	Enriched in amphid sheath cell according to RNA-seq. Affected by cyc-1, cid-1, aak-2, lin-15B, wdr-23, smg-2, smgl-1, smgl-2, tatn-1, set-2, daf-2, glp-1, hsf-1, rbr-2, mir-34, mir-35, hrde-1, alg-1, emb-4, adr-2, sma-2, sma-4, nuo-6, eat-2, pmt-2, nhl-2, atf-7, pmk-1, hsb-1, aak-1, nmad-1, mex-3, spn-4, alh-6, mrps-5, olrn-1, malt-1, nfki-1, ilc-17.1, srbc-48, hira-1, bcat-1, fhod-1, unc-30, daf…
WBGene00013516	296.205	-0.538623	0.154252	-3.49183	0.000479726	0.00750463	Y73F4A.3	Is affected by several genes including daf-16\; daf-2\; and skn-1 based on microarray\; tiling array\; RNA-seq\; and studies. Is affected by eighteen chemicals including hydrogen sulfide\; methylmercuric chloride\; and bisphenol A based on microarray and RNA-seq studies. Is predicted to encode a protein with the following domains: DOMON domain and DOMON domain.	Affected by zfp-1, cyc-1, hlh-30, ets-4, hpl-2, nhr-114, smg-2, smgl-1, smgl-2, eat-2, nhr-62, tatn-1, prg-1, clk-1, tdp-1, daf-2, rbr-2, set-25, met-2, skn-1, dpy-21, mir-34, daf-12, daf-16, mir-35, emb-4, sma-2, sma-4, mir-71, cox-5B, his-3, elt-7, elt-2, isp-1, hmg-3, spt-16, pry-1, atfs-1, sek-1, aak-1, aak-2, spc-1, unc-70, numr-1, numr-2, npr-8, mrps-5, daf-1, daf-3, ngn-1, srbc-48, hira-1,…
WBGene00007107	454.803	-0.538729	0.153837	-3.50194	0.000461877	0.00734039	pfd-4	Predicted to enable unfolded protein binding activity. Predicted to be involved in protein folding. Predicted to be located in cytoplasm. Predicted to be part of prefoldin complex. Is an ortholog of human PFDN4 (prefoldin subunit 4).	Enriched in dopaminergic neuron, hypodermis, AFD, ASER, germ line, male-specific anatomical entity and intestine according to tiling array, RNA-seq and microarray. Affected by aak-2, daf-12, let-7, gld-1, tatn-1, prg-1, clk-1, tdp-1, cox-5B, jmjd-3.1, jmjd-1.2, hsf-1, glh-4, glh-1, pgl-1, pgl-3, sma-2, sma-4, pmt-2, pry-1, aak-1, unc-70, sin-3, mrps-5, set-6, baz-2, set-2 and sir-2.1 according to…
WBGene00015695	1367.87	-0.538897	0.108018	-4.98897	6.07032e-07	5.24633e-05	ugt-26	Predicted to enable glucuronosyltransferase activity. Predicted to be located in intracellular membrane-bounded organelle. Human ortholog(s) of this gene implicated in several diseases, including Crigler-Najjar syndrome\; Gilbert syndrome\; and female reproductive organ cancer (multiple). Is an ortholog of several human genes including UGT1A10 (UDP glucuronosyltransferase family 1 member A10)\; U…	Enriched in coelomocyte, ASER, intestine, head mesodermal cell and male-specific anatomical entity according to tiling array, RNA-seq and microarray. Affected by smg-2, smgl-1, nhr-8, tatn-1, clk-1, ash-2, tdp-1, lin-35, daf-2, ham-3, swsn-2.2, daf-16, npr-1, cox-5B, jmjd-3.1, jmjd-1.2, hsf-1, rbr-2, mir-60, glh-4, glh-1, pgl-1, pgl-3, morc-1, alg-1, emb-4, sma-2, sma-4, mir-71, elt-7, elt-2, isp…
WBGene00010055	2767.72	-0.539299	0.0982047	-5.49158	3.98358e-08	5.8098e-06	dhgd-1	Predicted to enable flavin adenine dinucleotide binding activity and oxidoreductase activity. Predicted to be located in mitochondrion. Human ortholog(s) of this gene implicated in D-2-hydroxyglutaric aciduria 1. Is an ortholog of human D2HGDH (D-2-hydroxyglutarate dehydrogenase).	Enriched in intestine according to RNA-seq and microarray. Affected by cyc-1, aak-2, daf-16, spe-44, nhr-114, eat-2, daf-2, lem-2, emr-1, csr-1, prg-1, mdt-15, npr-1, hsf-1, dpy-21, glh-4, glh-1, pgl-1, pgl-3, mir-35, vgln-1, alg-1, emb-4, sma-2, sma-4, lin-22, smo-1, egl-9, thoc-5, pry-1, pals-22, sek-1, smn-1, unc-70, iff-1, mex-3, sin-3, sftb-1, nonu-1, crh-1, nfyb-1, cox-5B, sir-2.1 and tax-6…
WBGene00012829	591.261	-0.541194	0.11143	-4.8568	1.19298e-06	8.83752e-05	Y43F8C.7	Predicted to be located in endoplasmic reticulum and membrane. Predicted to be integral component of membrane. Predicted to be part of EMC complex. Is an ortholog of human EMC10 (ER membrane protein complex subunit 10).	Enriched in excretory cell, GABAergic neuron, NSM, germ line and neuron according to tiling array, RNA-seq and microarray. Affected by cyc-1, lin-39, let-7, gld-1, sma-2, sma-4, pmt-2, sin-3, mrps-5, set-6, baz-2, egl-43, set-2, let-418, spr-1, smo-1 and sir-2.1 according to microarray, RNA-seq and proteomic study. Affected by cadmium and allantoin according to microarray.
WBGene00001682	1467.34	-0.541691	0.125012	-4.33311	1.47019e-05	0.00058312	gpc-2	Predicted to enable G-protein beta-subunit binding activity. Predicted to be involved in G protein-coupled receptor signaling pathway. Predicted to be part of heterotrimeric G-protein complex. Expressed in muscle cell and neurons. Is an ortholog of human GNG13 (G protein subunit gamma 13).	Enriched in PVD, OLL, dopaminergic neuron, neuron, AFD, ASER, PLM, germ line, AVK, head mesodermal cell, sensory neuron, ADE, AIZ, AVG, CEP, DA9, DA neuron, DB1, DB neuron, HSN, I1 neuron, I4 neuron, M1 neuron, MC neuron, NSM, PDE, PVM, PVR, PVW, RIG, RIH, URA, VA12, VB1, VB neuron, VC5, VC4, VC neuron, I5 neuron, SAB, retrovesicular ganglion, intestine and VA neuron according to microarray, tili…
WBGene00010424	605.755	-0.542665	0.145827	-3.72129	0.000198211	0.00414096	lep-5	Expressed in several structures, including nervous system\; pharynx\; seam cell\; somatic gonad\; and vulva.	Enriched in Psub1, male-specific anatomical entity, Z4, Z1, gon_male_dtc posterior, gon_male_dtc anterior, Z1.p, Z4.a, neuron, muscle cell, somatic gonad precursor, AIZ, AS neuron, DA neuron, DB1, DB neuron, I4 neuron, M2 neuron, NSM, PDB, PVW, RIG, VA12, VB1, VB neuron and XXX cell according to RNA-seq. Affected by clk-1, age-1, daf-12, prp-8, eat-2, tatn-1, emr-1, lem-2, prg-1, csr-1, glh-4, gl…
WBGene00001950	95.2057	-0.546454	0.158124	-3.45586	0.000548543	0.00813576	hlh-3	Enables RNA polymerase II cis-regulatory region sequence-specific DNA binding activity and protein heterodimerization activity. Contributes to RNA polymerase II transcription regulatory region sequence-specific DNA binding activity. Involved in several processes, including regulation of axon extension involved in axon guidance\; regulation of oviposition\; and response to food. Located in nucleus…	Enriched in pharynx, GABAergic neuron, male-specific anatomical entity and germ line according to microarray, tiling array and RNA-seq. Affected by hpl-2, rsr-2, ubc-9, puf-8, clk-1, skn-1, dpy-21, mir-34, daf-16, set-4, glh-4, glh-1, pgl-1, pgl-3, hmg-3, daf-2, eat-2, nhl-2, rrf-3, spc-1, unc-70, sftb-1, swsn-1, unc-30, nhr-49 and fbf-1 according to tiling array, microarray and RNA-seq. Affected…
WBGene00017999	298.723	-0.54663	0.161079	-3.39355	0.000689939	0.0095642	emc-6	Predicted to be involved in autophagosome assembly. Predicted to be located in endoplasmic reticulum membrane. Predicted to be integral component of membrane. Predicted to be part of EMC complex. Is an ortholog of human EMC6 (ER membrane protein complex subunit 6).	Enriched in PLM, intestine and germ line according to RNA-seq. Affected by tatn-1, csr-1, npr-1, cox-5B, jmjd-3.1, jmjd-1.2, hsf-1, mir-34, glh-4, glh-1, pgl-1, pgl-3, sma-2, sma-4, lin-22, daf-2, nhl-2, aak-1, aak-2, smn-1, unc-70 and ain-2 according to RNA-seq and microarray. Affected by rotenone, Rifampin, allantoin and fluoranthene according to RNA-seq and microarray.
WBGene00009813	1651.9	-0.548628	0.101622	-5.39869	6.71293e-08	9.21449e-06	haly-1	Predicted to enable histidine ammonia-lyase activity. Involved in histidine catabolic process\; stress response to zinc ion\; and zinc ion homeostasis. Predicted to be located in cytoplasm. Human ortholog(s) of this gene implicated in histidinemia. Is an ortholog of human HAL (histidine ammonia-lyase).	Enriched in ventral nerve cord, body wall musculature, vulval muscle, nerve ring, dorsal nerve cord, somatic neuron, tail neuron, lateral nerve cord, germline precursor cell, hypodermis and PLM according to Chronogram analysis, tiling array and RNA-seq. Affected by alg-1, cyc-1, cid-1, daf-12, wdr-23, tatn-1, clk-1, tdp-1, daf-2, daf-16, tcer-1, npr-1, cox-5B, jmjd-3.1, jmjd-1.2, rbr-2, kgb-1, mi…
WBGene00013263	407.028	-0.548958	0.138949	-3.9508	7.78891e-05	0.002027	txdc-12.1	Predicted to enable oxidoreductase activity. Predicted to be involved in negative regulation of cell death. Predicted to be located in endoplasmic reticulum. Human ortholog(s) of this gene implicated in breast cancer\; pancreatic ductal adenocarcinoma\; and pancreatic ductal carcinoma. Is an ortholog of human TXNDC12 (thioredoxin domain containing 12).	Enriched in hypodermis, PLM, somatic gonad precursor and intestine according to tiling array, RNA-seq and microarray. Affected by nhr-49, rsr-2, daf-2, let-7, gld-1, lem-2, bar-1, ubc-9, clk-1, tdp-1, aak-2, crtc-1, daf-16, npr-1, hsf-1, set-25, met-2, dpy-21, mir-34, glh-4, glh-1, pgl-1, pgl-3, vgln-1, alg-1, alg-2, emb-4, nrx-1, nlg-1, sma-2, sma-4, cox-5B, smo-1, nuo-6, set-9, hpl-2, hmg-3, sp…
WBGene00013284	556.966	-0.550335	0.111907	-4.91778	8.75309e-07	6.88495e-05	daf-22	Enables propanoyl-CoA C-acyltransferase activity. Involved in several processes, including carbohydrate derivative metabolic process\; dauer larval development\; and positive regulation of developmental process. Located in peroxisome. Expressed in body wall musculature\; hypodermis\; intestine\; and neurons. Used to study obesity. Human ortholog(s) of this gene implicated in Zellweger syndrome. I…	Enriched in germ line, intestine, pharyngeal muscle cell, Psub1 and head mesodermal cell according to proteomic study, tiling array and RNA-seq. Affected by age-1, nhr-49, prp-8, let-7, gld-1, aak-2, crtc-1, htz-1, lin-35, tcer-1, daf-2, npr-1, cox-5B, jmjd-3.1, jmjd-1.2, hsf-1, rbr-2, mir-60, dpy-21, hlh-30, glh-4, glh-1, pgl-1, pgl-3, morc-1, pry-1, nhr-86, mdt-15, sek-1, aak-1, nmad-1, spc-1, …
WBGene00007609	562.074	-0.550998	0.133144	-4.13836	3.49805e-05	0.00112331	C15C8.7	Enriched in several structures, including body wall muscle cell\; distal tip cell\; germ line\; neurons\; and retrovesicular ganglion based on Chronogram\; tiling array\; RNA-seq\; and microarray studies. Is affected by several genes including elt-2\; fbf-1\; and sma-2 based on microarray and RNA-seq studies. Is affected by five chemicals including rotenone\; multi-walled carbon nanotube\; and si…	Enriched in intestine, body wall muscle cell, dopaminergic neuron, PVD, OLL, germ line, somatic gonad precursor, distal tip cell, I5 neuron, DA neuron, SAB, retrovesicular ganglion, VA neuron and neuron according to Chronogram analysis, tiling array, RNA-seq and microarray. Affected by cyc-1, jmjd-3.1, sma-2, lin-22, elt-2, nhr-86, meg-3, meg-4, sin-3, wdr-5.1, set-2, ain-2, fbf-1, tax-6 and tdp-…
WBGene00003509	225.006	-0.55551	0.140878	-3.94319	8.04042e-05	0.00207318	mxl-1	Enables protein domain specific binding activity and protein heterodimerization activity. Contributes to sequence-specific DNA binding activity. Involved in determination of adult lifespan. Located in nucleus. Part of transcription regulator complex. Expressed in tail neurons. Human ortholog(s) of this gene implicated in lung small cell carcinoma and pheochromocytoma. Is an ortholog of human MAX …	Enriched in Psub3, AFD, germ line and intestine according to RNA-seq and microarray. Affected by aak-2, unc-120, smg-2, tatn-1, swsn-2.2, jmjd-3.1, jmjd-1.2, flp-6, hlh-30, mir-34, daf-16, dpy-21, glh-4, glh-1, pgl-1, pgl-3, alg-1, alg-2, emb-4, sma-4, pals-22, aak-1, meg-3, meg-4, sin-3, mrps-5, bcat-1, hlh-11, sir-2.1, ain-2, dpy-10, fbf-1, rnp-8 and gld-1 according to RNA-seq and microarray. A…
WBGene00007506	352.121	-0.555991	0.147775	-3.76242	0.000168277	0.00364149	fbxc-58	Involved in innate immune response. Expressed in body wall musculature\; neuronal sheath cell\; pharyngeal-intestinal valve\; and vulval muscle.	Enriched in intestine, hermaphrodite-specific anatomical entity and sensory neuron according to tiling array and RNA-seq. Affected by atfs-1, spg-7, smg-2, smgl-1, smgl-2, nhr-8, blmp-1, csr-1, wrn-1, tdp-1, daf-2, mdt-15, ham-3, swsn-2.2, hpk-1, npr-1, cox-5B, jmjd-3.1, jmjd-1.2, hsf-1, dpy-21, mir-34, hrpr-1, glh-4, glh-1, pgl-1, pgl-3, mir-35, morc-1, emb-4, sid-3, sta-1, lin-22, mir-71, his-3…
WBGene00006635	149.167	-0.556127	0.156925	-3.5439	0.000394248	0.00654789	tsp-9	Predicted to be integral component of plasma membrane. Human ortholog(s) of this gene implicated in common variable immunodeficiency. Is an ortholog of human CD81 (CD81 molecule).	Enriched in pharynx, intestine and somatic gonad precursor according to microarray, RNA-seq and proteomic study. Affected by cyc-1, jmjd-3.1, jmjd-1.2, unc-39, glh-4, glh-1, pgl-1, pgl-3, vgln-1, fog-2, emb-4, sma-2, sma-4, daf-2, atfs-1, pals-22, sek-1, aak-1, aak-2, sin-3, olrn-1, set-2, let-418, spr-1, sir-2.1, dcr-1, slr-2, alg-1, tdp-1 and nuo-6 according to microarray and RNA-seq. Affected …
WBGene00001392	1046.67	-0.558508	0.114765	-4.86655	1.13563e-06	8.53495e-05	far-8	Predicted to enable lipid binding activity.	Enriched in amphid sheath cell and ASER according to RNA-seq. Affected by daf-12, smg-2, smgl-1, smgl-2, let-7, gld-1, tatn-1, clk-1, set-2, tdp-1, daf-2, daf-16, hsf-1, dpy-21, mir-34, elli-1, glh-4, glh-1, pgl-1, pgl-3, hrde-1, alg-1, emb-4, sma-2, sma-4, drh-3, eat-2, pry-1, nhl-2, pals-25, ints-6, hsb-1, aak-1, aak-2, mex-3, wdr-5.1, mrps-5, set-6, baz-2, olrn-1, mut-16, malt-1, nfki-1, ilc-1…
WBGene00004487	3230.76	-0.558916	0.117001	-4.77701	1.77917e-06	0.00011895	rps-18	Predicted to enable RNA binding activity. Predicted to be a structural constituent of ribosome. Predicted to be involved in translation. Predicted to be located in cytosol. Predicted to be part of small ribosomal subunit. Is an ortholog of human RPS18 (ribosomal protein S18).	Enriched in germ line, somatic gonad precursor, CAN, distal tip cell, excretory gland cell, gonadal sheath cell, I4 neuron, M2 neuron, NSM, RIG, spermatheca, intestine and muscle cell according to RNA-seq and microarray. Affected by aak-2, daf-16, daf-2, let-7, gld-1, alg-3, alg-4, tatn-1, jmjd-3.1, dep-1, glh-4, glh-1, pgl-1, pgl-3, atm-1, emb-4, isp-1, nuo-6, flr-4, pid-3, tofu-6, tost-1, nmad-…
WBGene00010495	234.727	-0.558965	0.128901	-4.33639	1.44845e-05	0.000576712	K02B12.2	Enriched in GABAergic neurons\; germ line\; hypodermis\; and intestine based on tiling array and RNA-seq studies. Is affected by several genes including daf-16\; daf-2\; and hsf-1 based on microarray and RNA-seq studies. Is affected by seventeen chemicals including rotenone\; bisphenol A\; and bisphenol S based on RNA-seq and microarray studies.	Enriched in hypodermis, intestine, GABAergic neuron and germ line according to tiling array and RNA-seq. Affected by cyc-1, lin-15B, smg-2, eat-2, tatn-1, ubc-9, puf-8, daf-2, hsf-1, lin-28, mir-34, glh-4, glh-1, pgl-1, pgl-3, sma-2, hpl-2, alg-1, hmg-3, pfd-6, nhl-2, ptl-1, sek-1, hsb-1, ceh-60, tph-1, wdr-23, srbc-48, rnp-6, bcat-1, swsn-1, tdc-1, mrpl-2, hda-1, sir-2.1, mir-243, lin-54, oga-1,…
WBGene00010759	470.467	-0.55956	0.13977	-4.00344	6.24274e-05	0.00173766	cysl-2	Enables L-3-cyanoalanine synthase activity and cysteine synthase activity. Involved in cysteine biosynthetic process from serine. Predicted to be located in cytoplasm. Expressed in hypodermis and pharynx. Used to study Down syndrome.	Enriched in germ line, germline precursor cell and intestine according to proteomic study, tiling array, RNA-seq and microarray. Affected by daf-2, lin-35, clk-1, cyc-1, isp-1, nhr-49, daf-12, hcf-1, nhr-114, wdr-23, eat-2, let-7, gld-1, tatn-1, hlh-30, ubc-9, wrn-1, tdp-1, skn-1, glp-1, tcer-1, cox-5B, jmjd-3.1, jmjd-1.2, hsf-1, rbr-2, skr-2, skr-1, dpy-21, mir-34, alg-1, alg-2, atm-1, emb-4, st…
WBGene00022515	405.292	-0.563419	0.140597	-4.00733	6.14093e-05	0.00171273	ttr-48	Predicted to be located in cell surface and extracellular region.	Enriched in intestine, PVD, OLL, head mesodermal cell and muscle cell according to tiling array, RNA-seq and microarray. Affected by zfp-1, clk-1, cyc-1, isp-1, sma-2, aak-2, daf-12, atfs-1, spg-7, daf-2, wrn-1, glp-1, daf-16, jmjd-1.2, hsf-1, rbr-2, chd-3, let-418, mir-34, glh-4, glh-1, pgl-1, pgl-3, morc-1, vit-2, pig-1, emb-4, sma-4, elt-2, elt-7, nuo-6, thoc-5, pry-1, nhl-2, zip-3, aak-1, ceh…
WBGene00008782	117.754	-0.564866	0.160796	-3.51295	0.000443167	0.00714836	sdz-14	Enriched in dopaminergic neurons\; hypodermis\; and pharyngeal muscle cell based on tiling array studies. Is affected by several genes including daf-2\; eat-2\; and sir-2.1 based on microarray\; tiling array\; and RNA-seq studies. Is affected by thirteen chemicals including Mercuric Chloride\; rotenone\; and stavudine based on microarray and RNA-seq studies.	Enriched in dopaminergic neuron, hypodermis and pharyngeal muscle cell according to tiling array. Affected by cyc-1, fer-1, rsr-2, smg-2, tatn-1, csr-1, chd-3, let-418, lin-28, glh-4, glh-1, pgl-1, pgl-3, emb-4, sma-4, his-69, his-70, his-72, his-74, his-71, alg-1, hmg-3, flr-4, eat-2, daf-2, nhl-2, sek-1, hsb-1, meg-3, meg-4, mex-1, mex-3, spn-4, tph-1, srbc-48, set-2, nfki-1, swsn-1, tdc-1, unc…
WBGene00010608	2140.79	-0.56492	0.122973	-4.59384	4.35172e-06	0.000233803	K07A1.1	Predicted to be located in membrane. Predicted to be integral component of membrane.	Enriched in germline precursor cell, FLP, germ line, AFD and head mesodermal cell according to tiling array, microarray and RNA-seq. Affected by cgh-1, nhr-114, tatn-1, npr-1, flp-6, mafr-1, glh-4, glh-1, pgl-1, pgl-3, emb-4, sma-4, lin-22, elt-2, elt-7, daf-2, nuo-6, pmt-2, damt-1, pals-22, hsp-6, aak-1, aak-2, spc-1, iff-1, mex-3, sin-3, spn-4, olrn-1, srbc-48, set-2, ikb-1, nfki-1, hlh-11, atf…
WBGene00000205	1250.08	-0.566965	0.112401	-5.04413	4.55601e-07	4.24179e-05	arx-7	Predicted to enable actin filament binding activity. Involved in Arp2\/3 complex-mediated actin nucleation\; epithelial cell migration\; and morphogenesis of embryonic epithelium. Located in cytoplasm. Predicted to be part of Arp2\/3 protein complex. Expressed in anchor cell\; hypodermis\; and linker cell. Human ortholog(s) of this gene implicated in lung squamous cell carcinoma. Is an ortholog o…	Enriched in germ line and neuron according to RNA-seq and microarray. Affected by hpl-2, K10D11.2, clk-1, mir-34, emb-4, sma-4, lin-22, daf-2, adr-1, adr-2, iff-1, sin-3, mrps-5, sir-2.1, fbf-1 and rnp-8 according to tiling array, proteomic study, microarray and RNA-seq. Affected by rotenone, stavudine, Zidovudine and Atrazine according to RNA-seq and microarray.
WBGene00008375	338.124	-0.567285	0.128516	-4.41413	1.01418e-05	0.000440981	D1054.8	Predicted to enable oxidoreductase activity. Is an ortholog of human HSD17B14 (hydroxysteroid 17-beta dehydrogenase 14).	Enriched in pharynx, intestine, PVD and OLL according to microarray, tiling array and RNA-seq. Affected by cyc-1, daf-12, nhr-8, let-7, gld-1, tatn-1, lem-2, emr-1, csr-1, ubc-9, lin-35, swsn-2.2, hpk-1, rsks-1, npr-1, cox-5B, jmjd-3.1, jmjd-1.2, blmp-1, hsf-1, rbr-2, set-25, met-2, glh-4, glh-1, pgl-1, pgl-3, vit-2, emb-4, sma-2, sma-4, lin-22, egl-9, eat-2, efa-6, daf-16, nmad-1, mex-1, mex-3, …
WBGene00021392	1283.46	-0.567966	0.123792	-4.58805	4.47405e-06	0.000236382	Y38A10A.7	Predicted to enable H2A histone acetyltransferase activity\; H4 histone acetyltransferase activity\; and peptide-serine-N-acetyltransferase activity. Predicted to be involved in histone H2A acetylation and histone H4 acetylation. Predicted to be located in nucleus. Is an ortholog of human NAA40 (N-alpha-acetyltransferase 40, NatD catalytic subunit).	Enriched in PVD, OLL, AFD and germ line according to tiling array and RNA-seq. Affected by cyc-1, isp-1, daf-12, let-7, gld-1, tatn-1, clk-1, npr-1, cox-5B, jmjd-3.1, hsf-1, flp-6, glh-4, glh-1, pgl-1, pgl-3, emb-4, sma-2, sma-4, daf-2, nuo-6, hpl-2, pmt-2, pals-22, ints-5, aak-1, aak-2, unc-70, iff-1, mex-3, sin-3, mrps-5, set-6, baz-2, srbc-48, set-2, bcat-1, hlh-11, spr-1, hda-1 and mir-243 ac…
WBGene00000063	1516.16	-0.568226	0.128041	-4.43785	9.08601e-06	0.000409348	act-1	Predicted to be a structural constituent of cytoskeleton. Involved in cortical actin cytoskeleton organization\; embryo development\; and mitotic cytokinesis. Located in striated muscle thin filament. Expressed in body wall musculature and gonad. Human ortholog(s) of this gene implicated in Baraitser-Winter syndrome\; autosomal dominant nonsyndromic deafness 20\; and hand, foot and mouth disease.…	Enriched in muscle cell, germ line, rectal gland cell and spermatheca according to RNA-seq. Affected by lin-39, aak-2, nhr-49, daf-12, prg-1, clk-1, lin-35, daf-16, daf-2, npr-1, jmjd-1.2, lmn-1, mir-34, dep-1, dpy-21, emb-4, sma-2, sma-4, lin-22, mir-71, ins-11, thoc-5, dlc-1, pry-1, pfd-6, nhl-2, pals-22, smn-1, erh-2, pid-3, tofu-6, tost-1, cfp-1, egl-43, olrn-1, mut-16, hira-1, rnp-6, cox-5B,…
WBGene00017459	224.467	-0.568257	0.156512	-3.63076	0.000282587	0.00521277	F14D2.11	Enriched in AFD\; germ line\; germline precursor cell\; and head mesodermal cell based on tiling array and RNA-seq studies. Is affected by several genes including hsf-1\; sir-2.1\; and pgl-1 based on microarray and RNA-seq studies. Is affected by seven chemicals including rotenone\; manganese chloride\; and Rifampin based on RNA-seq and microarray studies. Is predicted to encode a protein with th…	Enriched in germline precursor cell, germ line, AFD and head mesodermal cell according to tiling array and RNA-seq. Affected by cyc-1, sma-2, smg-2, smgl-1, tatn-1, hsf-1, chd-3, let-418, mir-34, glh-4, glh-1, pgl-1, pgl-3, hpl-2, mina-1, aak-1, aak-2, mex-3, sin-3, mrps-5, mut-16, set-2, ikb-1, nfki-1, atfs-1, sir-2.1, fbf-1, mir-243 and tdp-1 according to microarray and RNA-seq. Affected by rot…
WBGene00003771	146.232	-0.568821	0.153883	-3.69644	0.000218645	0.00446897	nlp-33	Involved in defense response to fungus and innate immune response. Predicted to be located in extracellular region.	Enriched in hypodermis, intestine, AFD and ASER according to tiling array and RNA-seq. Affected by isp-1, cid-1, sma-2, sma-4, aak-2, emr-1, lem-2, prg-1, ubc-9, wrn-1, daf-2, cox-5B, dop-1, hsf-1, mir-34, daf-12, daf-16, morc-1, alg-2, emb-4, ins-11, his-69, his-70, his-72, his-74, his-71, hmg-3, pry-1, atfs-1, nhl-2, pals-22, efa-6, ifo-1, rrf-3, zip-3, sek-1, aak-1, kri-1, mpk-2, spc-1, unc-70…
WBGene00010230	812.85	-0.569214	0.138636	-4.10581	4.02906e-05	0.00124803	rpac-19	Predicted to contribute to DNA-directed 5'-3' RNA polymerase activity. Predicted to be involved in transcription, DNA-templated. Predicted to be located in nucleus. Predicted to be part of RNA polymerase I complex and RNA polymerase III complex. Human ortholog(s) of this gene implicated in Treacher Collins syndrome 2. Is an ortholog of human POLR1D (RNA polymerase I and III subunit D).	Enriched in germ line, AVE, body wall muscle cell and intestine according to proteomic study, tiling array, RNA-seq and microarray. Affected by cgh-1, cyc-1, let-7, gld-1, tatn-1, prg-1, clk-1, hsf-1, glh-4, glh-1, pgl-1, pgl-3, emb-4, sma-4, daf-2, isp-1, nuo-6, alg-1, pmt-2, nhl-2, pals-22, aak-1, aak-2, csr-1, set-6, baz-2, mut-16, set-2, bcat-1, hda-1, sir-2.1, mir-243, daf-19, tdp-1 and lin-…
WBGene00013391	1419.28	-0.56981	0.144164	-3.95251	7.73344e-05	0.00202007	Y62H9A.3	Enriched in RIM\; interneuron\; and spermatheca based on RNA-seq studies. Is affected by several genes including daf-16\; daf-2\; and glp-1 based on microarray\; tiling array\; proteomic\; and RNA-seq studies. Is affected by seventeen chemicals including Ethanol\; 1-methylnicotinamide\; and rotenone based on RNA-seq and microarray studies.	Enriched in hermaphrodite-specific anatomical entity, AVG, RIM, PVC, AVA, AVD, AVE, AVK and spermatheca according to RNA-seq. Affected by cyc-1, cid-1, sma-2, sma-4, rsr-2, daf-2, let-7, gld-1, tatn-1, blmp-1, clk-1, tdp-1, swsn-2.2, npr-1, hsf-1, glp-1, cox-5B, mir-34, mafr-1, dep-1, elli-1, daf-12, daf-16, glh-4, glh-1, pgl-1, pgl-3, morc-1, alg-1, alg-2, atm-1, mir-71, nuo-6, set-26, hpl-2, eg…
WBGene00008016	94.0217	-0.570471	0.167177	-3.41238	0.000643992	0.00904367	C38D9.8	Enriched in hypodermis based on tiling array studies. Is affected by several genes including daf-2\; mex-3\; and mex-1 based on tiling array\; RNA-seq\; and microarray studies. Is affected by eleven chemicals including hydrogen sulfide\; methylmercuric chloride\; and Tunicamycin based on microarray and RNA-seq studies.	Enriched in hypodermis according to tiling array. Affected by hpl-2, let-418, sma-2, drh-3, his-69, his-70, his-72, his-74, his-71, daf-2, nhl-2, mex-1, mex-3, sin-3, spn-4, srbc-48, set-2, tdc-1, spr-1, lin-54 and tbx-2 according to tiling array, RNA-seq and microarray. Affected by hydrogen sulfide, methylmercuric chloride, Tunicamycin, Alovudine, Psoralens, allantoin, metformin, Sirolimus, Rifa…
WBGene00020322	792.75	-0.571411	0.114031	-5.01101	5.41456e-07	4.73808e-05	T07F12.2	Predicted to be located in membrane. Predicted to be integral component of membrane. Is an ortholog of human PRADC1 (protease associated domain containing 1).	Enriched in germ line, intestine and neuron according to RNA-seq and microarray. Affected by alg-1, npr-1, jmjd-3.1, glh-4, glh-1, pgl-1, pgl-3, morc-1, vit-2, sma-2, sma-4, daf-2, nuo-6, nhl-2, ptl-1, daf-16, aak-1, aak-2, iff-1, sin-3, cfp-1, set-2, let-418, spr-1, sir-2.1, dcr-1, ain-1, ain-2, slr-2, fbf-1 and isp-1 according to microarray and RNA-seq. Affected by rotenone, Zidovudine, Hydroly…
WBGene00014091	1416.94	-0.571986	0.0954255	-5.99406	2.04662e-09	4.54836e-07	ZK822.4	Enriched in AFD\; PLM\; and amphid sheath cell based on RNA-seq studies. Is affected by several genes including daf-16\; daf-2\; and glp-1 based on microarray and RNA-seq studies. Is affected by ten chemicals including aldicarb\; bisphenol A\; and procyanidin based on microarray and RNA-seq studies. Is predicted to encode a protein with the following domains: Domain of unknown function DUF148 and…	Enriched in amphid sheath cell, AFD and PLM according to RNA-seq. Affected by cyc-1, cid-1, smgl-1, tatn-1, set-2, tdp-1, daf-2, glp-1, daf-16, hpk-1, jmjd-3.1, jmjd-1.2, mir-34, elli-1, dpy-21, glh-4, glh-1, pgl-1, pgl-3, morc-1, hrde-1, alg-1, emb-4, adr-2, sma-2, sma-4, nuo-6, pry-1, nhl-2, pals-25, hsb-1, aak-1, aak-2, nmad-1, rsks-1, ztf-11, mex-1, mex-3, spn-4, wdr-5.1, mrps-5, srbc-48, bca…
WBGene00021960	609.29	-0.574051	0.15209	-3.77442	0.000160383	0.00352514	tmem-258	Predicted to be involved in protein N-linked glycosylation. Predicted to be located in membrane-bounded organelle and protein-containing complex. Predicted to be part of oligosaccharyltransferase I complex. Is an ortholog of human TMEM258 (transmembrane protein 258).	Enriched in hypodermis, AFD, ASER, PLM, germ line, coelomocyte, excretory gland cell and neuron according to tiling array, RNA-seq and microarray. Affected by alg-3, alg-4, jmjd-3.1, jmjd-1.2, hlh-30, mir-34, sma-2, sma-4, lin-22, nuo-6, ints-6, aak-1, aak-2, smn-1, iff-1, mrps-5, pal-1 and fbf-1 according to RNA-seq and microarray. Affected by rotenone, Cry5B, silicon dioxide nanoparticle, fluor…
WBGene00015112	749.433	-0.574645	0.131525	-4.3691	1.24762e-05	0.000516803	B0281.5	Involved in ion transport and protein folding. Is an ortholog of human KCTD10 (potassium channel tetramerization domain containing 10)\; KCTD13 (potassium channel tetramerization domain containing 13)\; and TNFAIP1 (TNF alpha induced protein 1).	Enriched in BAG, germline precursor cell, hypodermis, pharyngeal muscle cell and germ line according to tiling array and RNA-seq. Affected by cyc-1, isp-1, lin-15B, eat-2, bar-1, prg-1, puf-8, clk-1, daf-2, glp-1, skn-1, npr-1, jmjd-3.1, hsf-1, mir-34, glh-4, glh-1, pgl-1, pgl-3, hrde-1, morc-1, emb-4, his-69, his-70, his-72, his-74, his-71, hpl-2, hmg-3, atfs-1, nhl-2, ints-9, sek-1, meg-3, meg-…
WBGene00008157	147.023	-0.576436	0.160226	-3.59765	0.000321106	0.00567651	C47F8.1	Enriched in germ line and intestine based on RNA-seq studies. Is affected by several genes including rrf-3\; sir-2.1\; and clk-1 based on microarray\; tiling array\; and RNA-seq studies. Is affected by fifteen chemicals including rotenone\; Alovudine\; and stavudine based on RNA-seq and microarray studies. Is predicted to encode a protein with the following domains: F-box domain\; F-box associate…	Enriched in germ line and intestine according to RNA-seq. Affected by fer-1, hpl-2, rsr-2, tatn-1, csr-1, clk-1, rsd-2, npr-1, jmjd-3.1, mir-34, fog-2, emb-4, ins-11, alg-1, hmg-3, pmt-2, atfs-1, nhl-2, rrf-3, ints-5, iff-1, sin-3, wdr-23, srbc-48, nfki-1, swsn-1, skpo-1, unc-30, sir-2.1, dcr-1, mir-243, ash-2, lin-54, mir-35, gei-8, pmk-1 and dnj-14 according to microarray, tiling array and RNA-…
WBGene00017962	497.719	-0.576808	0.128579	-4.48603	7.25635e-06	0.00034323	fbxa-72	Enriched in several structures, including Z1.p\; Z4.a\; intestine\; male distal tip cell\; and somatic gonad precursor based on tiling array\; RNA-seq\; proteomic\; and microarray studies. Is affected by several genes including daf-16\; daf-2\; and daf-12 based on microarray\; RNA-seq\; and studies. Is affected by nineteen chemicals including Tunicamycin\; sodium arsenite\; and indole based on mi…	Enriched in hypodermis, gon_male_dtc posterior, gon_male_dtc anterior, Z1.p, Z4.a, Z4, Z1, intestine and somatic gonad precursor according to tiling array, RNA-seq, proteomic study and microarray. Affected by daf-12, cyc-1, cid-1, sma-2, aak-2, wdr-23, smgl-1, tatn-1, ubc-9, tdp-1, daf-2, hpk-1, npr-1, jmjd-1.2, dop-1, mir-34, glh-4, glh-1, pgl-1, pgl-3, alg-1, emb-4, sma-4, lin-22, mir-71, ins-1…
WBGene00017041	168.416	-0.577923	0.151113	-3.82445	0.000131066	0.0030432	D2007.1	Involved in innate immune response. Expressed in body wall musculature\; head neurons\; pharyngeal muscle cell\; and spermatheca.	Enriched in dopaminergic neuron, intestine, pharyngeal muscle cell, PVD, OLL, muscle cell, seam cell and neuron according to tiling array, RNA-seq and microarray. Affected by cyc-1, isp-1, sma-2, lin-15B, atfs-1, spg-7, smgl-1, nhr-8, lem-2, emr-1, prg-1, daf-2, npr-1, chd-3, let-418, glh-4, glh-1, pgl-1, pgl-3, morc-1, emb-4, lin-22, nuo-6, hpl-2, eat-2, pfd-6, nhl-2, pals-22, pmk-1, sek-1, aak-…
WBGene00018088	985.172	-0.57851	0.125831	-4.59753	4.27538e-06	0.000232917	trpp-4	Predicted to be involved in endoplasmic reticulum to Golgi vesicle-mediated transport. Predicted to be located in Golgi apparatus and endoplasmic reticulum. Predicted to be part of TRAPP complex. Is an ortholog of human TRAPPC4 (trafficking protein particle complex subunit 4).	Enriched in germ line and germline precursor cell according to RNA-seq. Affected by tatn-1, daf-2, hsf-1, glh-4, glh-1, pgl-1, pgl-3, alg-2, emb-4, sin-3, spr-1, sir-2.1, ain-2 and fbf-1 according to RNA-seq and microarray. Affected by mianserin, stavudine, silicon dioxide nanoparticle and resveratrol according to RNA-seq and microarray.
WBGene00007261	447.797	-0.579374	0.107185	-5.40537	6.46739e-08	8.96533e-06	lron-3	Predicted to be located in membrane. Is an ortholog of human TPBG (trophoblast glycoprotein).	Enriched in PVD, OLL, dopaminergic neuron, hypodermis, NSM, neuron, AFD, PLM, AVK, head mesodermal cell, sensory neuron, ALM, AVB, DA neuron, DB neuron, HSN, PDA, PHC and body wall musculature according to microarray, tiling array and RNA-seq. Affected by sma-2, sma-4, let-7, gld-1, lem-2, emr-1, glp-1, npr-1, dpy-21, mir-34, glh-4, glh-1, pgl-1, pgl-3, emb-4, ints-5, aak-1, aak-2, nmad-1, mex-1,…
WBGene00004448	877.941	-0.58041	0.15158	-3.82906	0.000128631	0.00300161	rpl-34	Predicted to be a structural constituent of ribosome. Predicted to be involved in ribosome biogenesis. Predicted to be located in ribosome. Predicted to be part of cytosolic large ribosomal subunit. Is an ortholog of human RPL34 (ribosomal protein L34).	Enriched in germ line, AFD, ASER, PLM, somatic gonad precursor, ADA, CAN, distal tip cell, excretory gland cell, I4 neuron, M2 neuron, MI neuron, NSM, RIG, spermatheca and URB according to proteomic study and RNA-seq. Affected by sma-2, mab-5, aak-2, atx-3, daf-2, daf-16, let-7, gld-1, tatn-1, ZK1236.1, cox-5B, jmjd-3.1, jmjd-1.2, glh-4, glh-1, pgl-1, pgl-3, emb-4, lin-22, isp-1, nuo-6, flr-4, aa…
WBGene00018071	384.703	-0.580437	0.146832	-3.95306	7.7157e-05	0.00201921	F35H10.6	Predicted to be involved in regulation of transcription, DNA-templated. Predicted to be located in cytoplasm. Predicted to be part of prefoldin complex. Is an ortholog of human UXT (ubiquitously expressed prefoldin like chaperone).	Enriched in body wall muscle cell, germ line, muscle cell, AFD, germline precursor cell, somatic gonad precursor and intestine according to tiling array, RNA-seq and microarray. Affected by cyc-1, tatn-1, prg-1, jmjd-3.1, hsf-1, pig-1, sma-2, sma-4, daf-2, pmt-2, pfd-6, pals-22, aak-1, aak-2, nmad-1, sin-3, set-2, met-2, spr-5, hda-1 and lin-54 according to microarray, RNA-seq and proteomic study…
WBGene00003990	654.989	-0.581377	0.133657	-4.34977	1.36283e-05	0.000551678	pfn-2	Predicted to enable actin monomer binding activity. Involved in muscle thin filament assembly. Predicted to be located in cell cortex. Expressed in pharynx and spermatheca.	Enriched in excretory cell, GABAergic neuron, NSM, PLM, sensory neuron, spermatheca and intestine according to tiling array, RNA-seq and microarray. Affected by clk-1, daf-16, sma-2, daf-2, jmjd-1.2, hsf-1, mir-34, glh-4, glh-1, pgl-1, pgl-3, emb-4, sma-4, lin-22, smo-1, isp-1, eat-2, nhl-2, pals-22, pals-25, atf-7, ints-5, sek-1, aak-1, aak-2, nmad-1, unc-70, sin-3, cfp-1, csr-1, mrps-5, set-6, …
WBGene00008191	298.111	-0.581576	0.140509	-4.13906	3.48734e-05	0.00112244	C49A1.10	Predicted to be located in membrane. Predicted to be integral component of membrane. Expressed in body wall musculature.	Enriched in body wall muscle cell, dopaminergic neuron, PVD, OLL, muscle cell, germ line, AVK and head mesodermal cell according to tiling array, RNA-seq, proteomic study and microarray. Affected by cyc-1, let-7, gld-1, lem-2, emr-1, tdp-1, daf-2, jmjd-3.1, jmjd-1.2, mir-34, glh-4, glh-1, pgl-1, pgl-3, alg-1, emb-4, sma-2, sma-4, smo-1, nhl-2, ifo-1, rrf-3, nmad-1, mex-1, mex-3, sin-3, spn-4, set…
WBGene00004815	215.983	-0.582109	0.136581	-4.26201	2.02594e-05	0.000754398	skr-9	Predicted to enable cullin family protein binding activity. Predicted to be involved in SCF-dependent proteasomal ubiquitin-dependent protein catabolic process. Predicted to be located in cytoplasm and nucleus. Expressed in intestine. Is an ortholog of human SKP1 (S-phase kinase associated protein 1).	Enriched in BAG, dopaminergic neuron, hypodermis and pharyngeal muscle cell according to tiling array. Affected by fer-1, hpl-2, smg-2, puf-8, gld-2, clk-1, daf-2, mys-1, mir-34, glh-4, glh-1, pgl-1, pgl-3, hrde-1, morc-1, emb-4, sma-4, ins-11, drh-3, alg-1, hmg-3, eat-2, nhl-2, hda-6, sek-1, hsb-1, mex-1, mex-3, sin-3, npr-8, tph-1, sacy-1, stt-3, hlh-2, srbc-48, set-2, swsn-1, sir-2.1, rrf-3, r…
WBGene00012686	147.747	-0.582813	0.172158	-3.38533	0.00071093	0.00973048	Y39B6A.27	Predicted to be located in membrane. Predicted to be integral component of membrane. Is an ortholog of human MFSD11 (major facilitator superfamily domain containing 11).	Enriched in excretory cell and GABAergic neuron according to tiling array. Affected by tatn-1, clk-1, csr-1, daf-16, npr-1, set-25, met-2, dpy-21, mir-34, elli-1, glh-4, glh-1, pgl-1, pgl-3, alg-1, sma-2, sma-4, lin-22, ins-11, daf-2, nuo-6, adr-1, eat-2, damt-1, nhl-2, pals-25, unc-70, numr-1, numr-2, lin-29, cec-4, rnp-6, isp-1, plp-1, unc-120, ubc-9, daf-18, dpy-9, mir-243 and nipi-3 according…
WBGene00044953	126.568	-0.585512	0.154433	-3.79136	0.000149827	0.00336173	D2096.13	Is affected by several genes including eat-2\; isp-1\; and hpl-2 based on microarray\; tiling array\; and RNA-seq studies. Is affected by twelve chemicals including rotenone\; multi-walled carbon nanotube\; and Zidovudine based on RNA-seq and microarray studies.	Affected by nhr-114, rsr-2, smgl-1, emb-4, hpl-2, hmg-3, thoc-5, eat-2, pfd-6, nhl-2, pals-22, ints-5, srbc-48, isp-1 and nfki-1 according to microarray, tiling array and RNA-seq. Affected by rotenone, multi-walled carbon nanotube, Zidovudine, metformin, Psoralens, allantoin, Sirolimus, Rifampin, cholesterol, silicon dioxide nanoparticle, 2 and 4-dinitroanisole according to RNA-seq and microarray.
WBGene00012382	1501.07	-0.585557	0.133733	-4.37854	1.19475e-05	0.000502333	ttr-16	Predicted to be located in cell surface and extracellular region.	Enriched in PLM, head mesodermal cell, ASH, ASJ, AWC-OFF, AWC-ON, PHA, PHB, intestine, muscle cell and body wall musculature according to RNA-seq and microarray. Affected by cyc-1, aak-2, atx-3, prg-1, crtc-1, glp-1, rbr-2, chd-3, mir-34, glh-4, glh-1, pgl-1, pgl-3, emb-4, sma-2, sma-4, lin-22, thoc-5, pals-22, sek-1, nmad-1, spc-1, mex-1, mex-3, sin-3, spn-4, daf-12, set-2, sftb-1, mrps-5, olrn-…
WBGene00018151	2330.26	-0.586889	0.118419	-4.95603	7.19464e-07	5.96048e-05	F37C12.3	Predicted to enable acyl binding activity and acyl carrier activity. Predicted to be involved in fatty acid biosynthetic process. Predicted to be located in mitochondrion. Predicted to be part of mitochondrial respiratory chain complex I. Is an ortholog of human NDUFAB1 (NADH:ubiquinone oxidoreductase subunit AB1).	Enriched in germ line, NSM, AFD, germline precursor cell, somatic gonad precursor and intestine according to proteomic study, RNA-seq and microarray. Affected by cid-1, lin-15B, prp-8, let-7, gld-1, csr-1, hsf-1, glh-4, glh-1, pgl-1, pgl-3, sma-2, sma-4, daf-2, isp-1, nuo-6, pmt-2, pry-1, F01D4.5, smn-1, sin-3, mrps-5, unc-30 and sir-2.1 according to microarray, RNA-seq and proteomic study. Affec…
WBGene00000779	4323.2	-0.587979	0.0970095	-6.06105	1.35233e-09	3.26448e-07	cpn-3	Located in myofibril. Expressed in anal region\; body wall musculature\; egg-laying apparatus\; enteric muscle\; and head neurons.	Enriched in body wall muscle cell, head mesodermal cell, muscle cell and body wall musculature according to tiling array, RNA-seq and microarray. Affected by daf-2, nhr-40, sma-2, daf-12, pgrn-1, let-7, gld-1, csr-1, glh-4, glh-1, pgl-1, pgl-3, daf-16, npr-1, rbr-2, mir-34, dep-1, dpy-21, ash-2, morc-1, emb-4, sma-4, lin-22, smo-1, his-69, his-70, his-72, his-74, his-71, flr-4, thoc-5, pry-1, pfd…
WBGene00008526	176.01	-0.588253	0.136072	-4.3231	1.53855e-05	0.00060851	F02D10.6	Predicted to be located in membrane. Predicted to be integral component of membrane.	Enriched in dopaminergic neuron, germline precursor cell and germ line according to tiling array and RNA-seq. Affected by cgh-1, cyc-1, isp-1, smg-2, puf-8, daf-2, chd-3, let-418, mir-34, sma-4, hpl-2, alg-1, egl-9, hmg-3, pfd-6, atfs-1, nhl-2, rrf-3, his-72, raga-1, mex-1, mex-3, cfp-1, sin-3, srbc-48, set-2, nfki-1, unc-30, sir-2.1, dcr-1, dpy-9, dpy-10, fbf-1, mir-243, rnp-8, nuo-6 and pmk-1 a…
[truncated: 150 more rows]

## Sheet: Description
WormBase Gene ID		Public Name	Species	Biotype	Sequence Name	Other Name	Transcript	Operon	WormPep	Protein Domain	UniProt	Reference UniProt ID	TreeFam	RefSeq_mRNA	RefSeq_protein	Genetic Map Position	RNAi Clone	RNAi Phenotype Observed	Allele Phenotype Observed	Coding_exon Non_silent Allele	Interacting Gene	Expr_pattern Tissue	Genomic Study Tissue	Expr_pattern LifeStage	Genomic Study LifeStage	Disease Info	Human Ortholog	Gene Ontology Association	Concise Description	Automated Description	Expression Cluster Summary	Reference
[truncated: 46,747 more rows]
